# Supplementary material for: Exploring Thiazolopyridine AV25R: Unraveling of Biological Activities, Selective Anti-Cancer Properties and In Silico Target and Binding Prediction in Hematological Neoplasms
Source: MDPI journal article supplement (doi:10.3390/molecules28248120), 2023-12-15
Supplement: s1 [file s1]

## Supplementary Materials: Figures

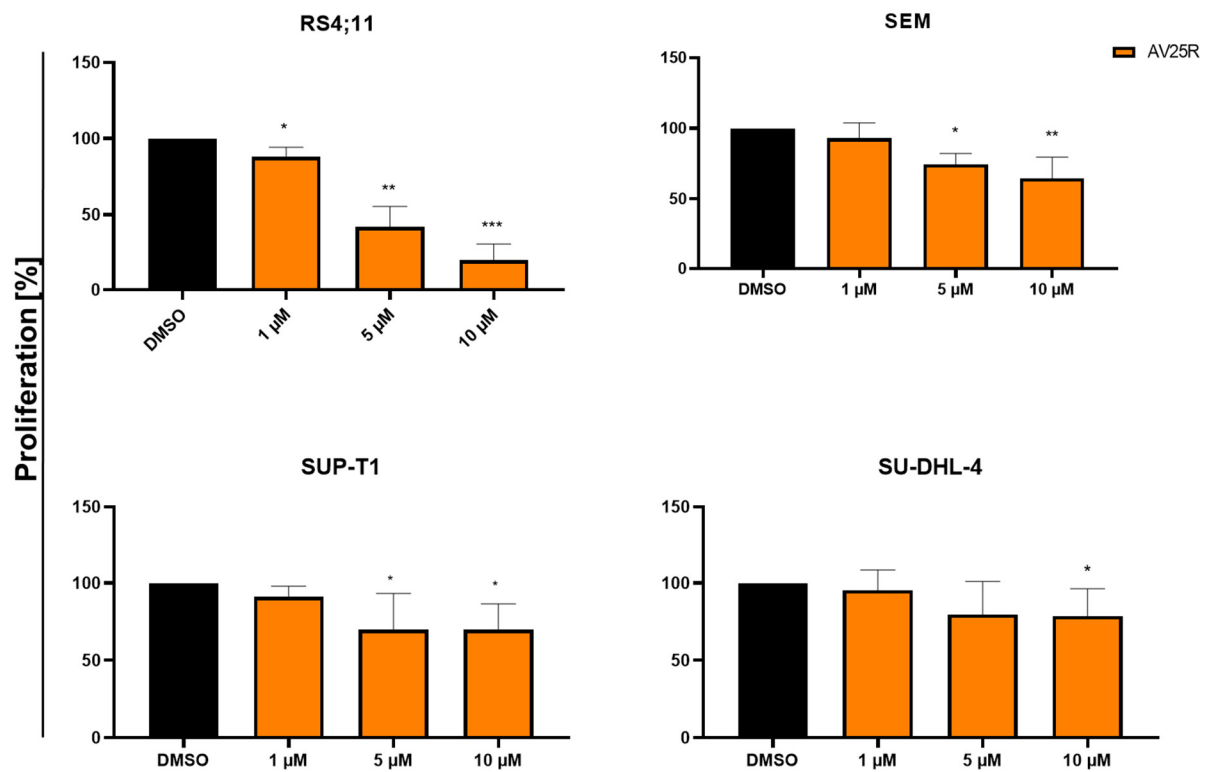

**Figure S1:** Results of cell count after 72 h of concentration-dependent AV25R exposure on B-ALL cell lines RS4;11 and SEM, as well as lymphoma cell lines SUP-T1 and SU-DHL-4. Data are presented as relative values (DMSO control was set as 100 %) as mean  $\pm$  SD ( $n \geq 3$ ).

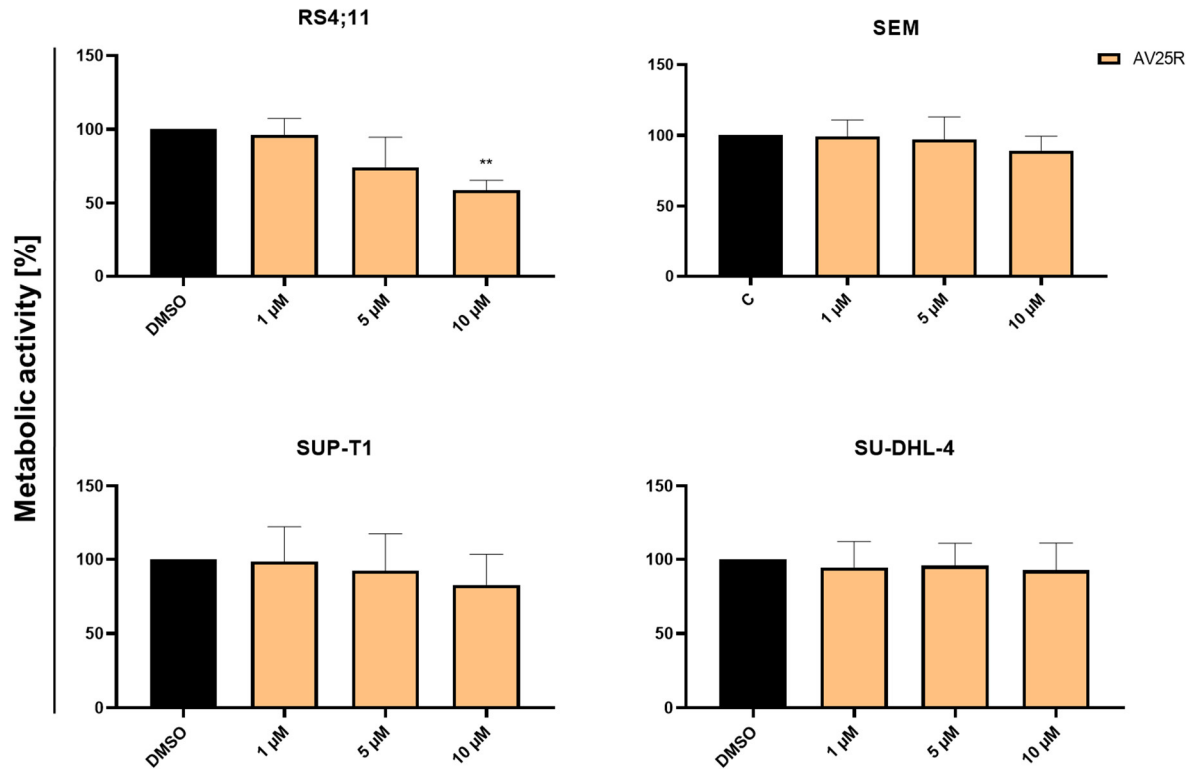

**Figure S2:** Results of WST-1 after 48 h of concentration-dependent AV25R exposure on B-ALL cell lines RS4;11 and SEM, as well as lymphoma cell lines SUP-T1 and SU-DHL-4. Data are presented as relative values (DMSO control was set as 100%) as mean  $\pm$  SD (n $\geq$ 3).

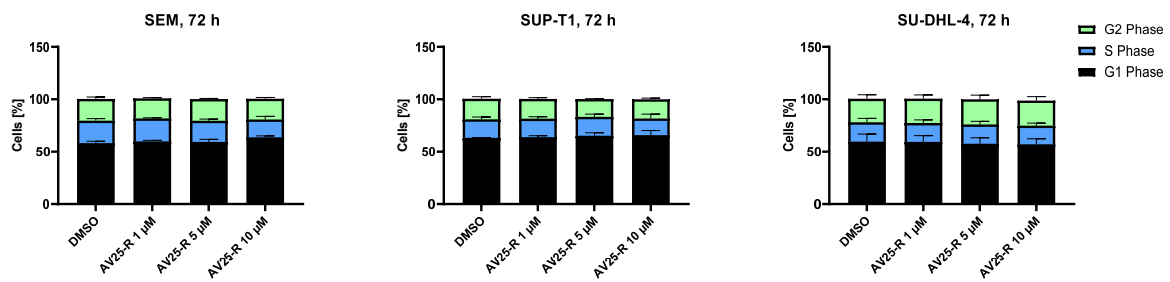

**Figure S3:** Cell cycle analysis after 72 h thiazolopyridine exposure on SEM, SUP-T1 and SU-DHL-4 cell line. The cell cycle phases are divided into sub-G1, G1, S and G2 phases. Shown is the percentage of cells in the corresponding phase in mean values with standard deviations (n = 3).
