# Supplementary material for: Exploring Thiazolopyridine AV25R: Unraveling of Biological Activities, Selective Anti-Cancer Properties and In Silico Target and Binding Prediction in Hematological Neoplasms
Source: Molecules. 2023 Dec 15;28(24):8120. doi: 10.3390/molecules28248120 (PMC10745743; doi:10.3390/molecules28248120)
Supplement: Supplementary file 1 [file molecules-28-08120-s001.zip › Supplementary Material/Supplementary Excel Files.xlsx]

## Sheet: T1
Table S1: Unique human protein tragets of AV25R identified using pharmacophore screening
PDB ID	UniProt ID	Fit Value	Selectivity	Features	Number of Features	ShapeSimilarity	UniProt Name	Protein names	Gene Names	Involvement in Pathway	Involvement in disease	Gene Ontology (cellular component)	Gene Ontology (molecular function)	Gene Ontology (GO)	Gene Ontology (biological process)	Protein families	Interacts with
2hrc	P22830	0.843442	6.3478	AHHH	4		HEMH_HUMAN	Ferrochelatase, mitochondrial (EC 4.98.1.1) (Heme synthase) (Protoheme ferro-lyase)	FECH	PATHWAY: Porphyrin-containing compound metabolism; protoheme biosynthesis; protoheme from protoporphyrin-IX: step 1/1.	DISEASE: Protoporphyria, erythropoietic, 1 (EPP1) [MIM:177000]: An autosomal recessive form of porphyria with onset usually before age 10 years. Porphyrias are inherited defects in the biosynthesis of heme, resulting in the accumulation and increased excretion of porphyrins or porphyrin precursors. They are classified as erythropoietic or hepatic, depending on whether the enzyme deficiency occurs…	mitochondrial inner membrane [GO:0005743]; mitochondrial matrix [GO:0005759]; mitochondrion [GO:0005739]	2 iron, 2 sulfur cluster binding [GO:0051537]; ferrochelatase activity [GO:0004325]; ferrous iron binding [GO:0008198]; heme binding [GO:0020037]; iron-responsive element binding [GO:0030350]; protein homodimerization activity [GO:0042803]	mitochondrial inner membrane [GO:0005743]; mitochondrial matrix [GO:0005759]; mitochondrion [GO:0005739]; 2 iron, 2 sulfur cluster binding [GO:0051537]; ferrochelatase activity [GO:0004325]; ferrous iron binding [GO:0008198]; heme binding [GO:0020037]; iron-responsive element binding [GO:0030350]; protein homodimerization activity [GO:0042803]; cholesterol metabolic process [GO:0008203]; detectio…	cholesterol metabolic process [GO:0008203]; detection of UV [GO:0009589]; erythrocyte differentiation [GO:0030218]; generation of precursor metabolites and energy [GO:0006091]; heme biosynthetic process [GO:0006783]; iron ion homeostasis [GO:0055072]; protoporphyrinogen IX metabolic process [GO:0046501]; regulation of eIF2 alpha phosphorylation by heme [GO:0010999]; regulation of hemoglobin biosy…	Ferrochelatase family	O00264
4ikr	P53582	0.769355	6.3478	HHHaromR	4	0.545098	MAP11_HUMAN	Methionine aminopeptidase 1 (MAP 1) (MetAP 1) (EC 3.4.11.18) (Peptidase M 1)	METAP1 KIAA0094			cytoplasm [GO:0005737]; cytosol [GO:0005829]	aminopeptidase activity [GO:0004177]; metal ion binding [GO:0046872]; metalloaminopeptidase activity [GO:0070006]; metalloexopeptidase activity [GO:0008235]	cytoplasm [GO:0005737]; cytosol [GO:0005829]; aminopeptidase activity [GO:0004177]; metal ion binding [GO:0046872]; metalloaminopeptidase activity [GO:0070006]; metalloexopeptidase activity [GO:0008235]; N-terminal protein amino acid modification [GO:0031365]; peptidyl-methionine modification [GO:0018206]; platelet aggregation [GO:0070527]; protein initiator methionine removal involved in protein…	N-terminal protein amino acid modification [GO:0031365]; peptidyl-methionine modification [GO:0018206]; platelet aggregation [GO:0070527]; protein initiator methionine removal involved in protein maturation [GO:0035551]; regulation of translation [GO:0006417]	Peptidase M24A family, Methionine aminopeptidase type 1 subfamily	O76003; Q0VD86; Q6FHY5; Q14596-2; Q58EX7; Q9UGI0
3ie3	P09211	0.736885	6.2792	AHHR	4	UG+G54:G5nique human protein tragets of AV25R identified using pharmacophore screening	GSTP1_HUMAN	Glutathione S-transferase P (EC 2.5.1.18) (GST class-pi) (GSTP1-1)	GSTP1 FAEES3 GST3			cytoplasm [GO:0005737]; cytosol [GO:0005829]; extracellular exosome [GO:0070062]; extracellular region [GO:0005576]; extracellular space [GO:0005615]; ficolin-1-rich granule lumen [GO:1904813]; mitochondrion [GO:0005739]; nucleus [GO:0005634]; secretory granule lumen [GO:0034774]; TRAF2-GSTP1 complex [GO:0097057]; vesicle [GO:0031982]	dinitrosyl-iron complex binding [GO:0035731]; fatty acid binding [GO:0005504]; glutathione peroxidase activity [GO:0004602]; glutathione transferase activity [GO:0004364]; JUN kinase binding [GO:0008432]; kinase regulator activity [GO:0019207]; nitric oxide binding [GO:0070026]; S-nitrosoglutathione binding [GO:0035730]	cytoplasm [GO:0005737]; cytosol [GO:0005829]; extracellular exosome [GO:0070062]; extracellular region [GO:0005576]; extracellular space [GO:0005615]; ficolin-1-rich granule lumen [GO:1904813]; mitochondrion [GO:0005739]; nucleus [GO:0005634]; secretory granule lumen [GO:0034774]; TRAF2-GSTP1 complex [GO:0097057]; vesicle [GO:0031982]; dinitrosyl-iron complex binding [GO:0035731]; fatty acid bind…	cellular response to lipopolysaccharide [GO:0071222]; central nervous system development [GO:0007417]; common myeloid progenitor cell proliferation [GO:0035726]; glutathione derivative biosynthetic process [GO:1901687]; glutathione metabolic process [GO:0006749]; hepoxilin biosynthetic process [GO:0051122]; linoleic acid metabolic process [GO:0043651]; negative regulation of acute inflammatory re…	GST superfamily, Pi family	Q6UY14-3; Q92624; Q9BWT7; A8MQ03; Q5TD97; P49639; Q15323; Q14525; O76011; P78385; Q07627; Q8IUG1; P60409; P60411; Q9BYR8; Q9BYR6; Q3LI66; Q9P2M1; Q5JR59-3; Q7Z3S9; P0DPK4; P22735; Q12933; Q8N720
1fkg	P62942	0.736476	6.2792	AAHH	4		FKB1A_HUMAN	Peptidyl-prolyl cis-trans isomerase FKBP1A (PPIase FKBP1A) (EC 5.2.1.8) (12 kDa FK506-binding protein) (12 kDa FKBP) (FKBP-12) (Calstabin-1) (FK506-binding protein 1A) (FKBP-1A) (Immunophilin FKBP12) (Rotamase)	FKBP1A FKBP1 FKBP12			cytoplasm [GO:0005737]; cytoplasmic side of membrane [GO:0098562]; cytosol [GO:0005829]; extrinsic component of organelle membrane [GO:0031312]; membrane [GO:0016020]; ryanodine receptor complex [GO:1990425]; sarcoplasmic reticulum [GO:0016529]; terminal cisterna [GO:0014802]; Z disc [GO:0030018]	activin binding [GO:0048185]; FK506 binding [GO:0005528]; macrolide binding [GO:0005527]; peptidyl-prolyl cis-trans isomerase activity [GO:0003755]; SMAD binding [GO:0046332]; transforming growth factor beta receptor binding [GO:0005160]; transmembrane transporter binding [GO:0044325]; type I transforming growth factor beta receptor binding [GO:0034713]	cytoplasm [GO:0005737]; cytoplasmic side of membrane [GO:0098562]; cytosol [GO:0005829]; extrinsic component of organelle membrane [GO:0031312]; membrane [GO:0016020]; ryanodine receptor complex [GO:1990425]; sarcoplasmic reticulum [GO:0016529]; terminal cisterna [GO:0014802]; Z disc [GO:0030018]; activin binding [GO:0048185]; FK506 binding [GO:0005528]; macrolide binding [GO:0005527]; peptidyl-p…	'de novo' protein folding [GO:0006458]; amyloid fibril formation [GO:1990000]; calcium ion transmembrane transport [GO:0070588]; chaperone-mediated protein folding [GO:0061077]; heart morphogenesis [GO:0003007]; heart trabecula formation [GO:0060347]; negative regulation of phosphoprotein phosphatase activity [GO:0032515]; negative regulation of transforming growth factor beta receptor signaling …	FKBP-type PPIase family, FKBP1 subfamily	P36896; Q9NZD4; P05067; P42345; Q92736; O15105; P36897; PRO_0000037309 [P0C6X7]; PRO_0000037312 [P0C6X7]; P11716
3byz	P28845	0.702364	6.3478	AHHH	4		DHI1_HUMAN	11-beta-hydroxysteroid dehydrogenase 1 (11-DH) (11-beta-HSD1) (EC 1.1.1.146) (7-oxosteroid reductase) (EC 1.1.1.201) (Corticosteroid 11-beta-dehydrogenase isozyme 1) (Short chain dehydrogenase/reductase family 26C member 1)	HSD11B1 HSD11 HSD11L SDR26C1	PATHWAY: Steroid metabolism. {ECO:0000305}.	DISEASE: Cortisone reductase deficiency 2 (CORTRD2) [MIM:614662]: An autosomal dominant error of cortisone metabolism characterized by a failure to regenerate cortisol from cortisone, resulting in increased cortisol clearance, activation of the hypothalamic- pituitary axis and ACTH-mediated adrenal androgen excess. Clinical features include hyperandrogenism resulting in hirsutism, oligo- amenorrh…	endoplasmic reticulum membrane [GO:0005789]; intracellular membrane-bounded organelle [GO:0043231]; membrane [GO:0016020]	11-beta-hydroxysteroid dehydrogenase (NADP+) activity [GO:0070524]; 7-beta-hydroxysteroid dehydrogenase (NADP+) activity [GO:0047022]; cortisol dehydrogenase activity [GO:0102196]; NADP binding [GO:0050661]; oxidoreductase activity [GO:0016491]; protein homodimerization activity [GO:0042803]; steroid binding [GO:0005496]	endoplasmic reticulum membrane [GO:0005789]; intracellular membrane-bounded organelle [GO:0043231]; membrane [GO:0016020]; 11-beta-hydroxysteroid dehydrogenase (NADP+) activity [GO:0070524]; 7-beta-hydroxysteroid dehydrogenase (NADP+) activity [GO:0047022]; cortisol dehydrogenase activity [GO:0102196]; NADP binding [GO:0050661]; oxidoreductase activity [GO:0016491]; protein homodimerization activ…	lung development [GO:0030324]; steroid catabolic process [GO:0006706]	Short-chain dehydrogenases/reductases (SDR) family
3et7	Q14289	0.649484	3.7823	ADHHaromHarom	5		FAK2_HUMAN	Protein-tyrosine kinase 2-beta (EC 2.7.10.2) (Calcium-dependent tyrosine kinase) (CADTK) (Calcium-regulated non-receptor proline-rich tyrosine kinase) (Cell adhesion kinase beta) (CAK-beta) (CAKB) (Focal adhesion kinase 2) (FADK 2) (Proline-rich tyrosine kinase 2) (Related adhesion focal tyrosine kinase) (RAFTK)	PTK2B FAK2 PYK2 RAFTK		DISEASE: Note=Aberrant PTK2B/PYK2 expression may play a role in cancer cell proliferation, migration and invasion, in tumor formation and metastasis. Elevated PTK2B/PYK2 expression is seen in gliomas, hepatocellular carcinoma, lung cancer and breast cancer.	apical dendrite [GO:0097440]; cell body [GO:0044297]; cell cortex [GO:0005938]; cytoplasm [GO:0005737]; cytoskeleton [GO:0005856]; cytosol [GO:0005829]; dendrite [GO:0030425]; dendritic spine [GO:0043197]; extrinsic component of cytoplasmic side of plasma membrane [GO:0031234]; focal adhesion [GO:0005925]; glutamatergic synapse [GO:0098978]; growth cone [GO:0030426]; lamellipodium [GO:0030027]; m…	3-phosphoinositide-dependent protein kinase binding [GO:0043423]; ATP binding [GO:0005524]; calmodulin-dependent protein kinase activity [GO:0004683]; NMDA glutamate receptor activity [GO:0004972]; non-membrane spanning protein tyrosine kinase activity [GO:0004715]; protein C-terminus binding [GO:0008022]; protein self-association [GO:0043621]; protein tyrosine kinase activity [GO:0004713]; prote…	apical dendrite [GO:0097440]; cell body [GO:0044297]; cell cortex [GO:0005938]; cytoplasm [GO:0005737]; cytoskeleton [GO:0005856]; cytosol [GO:0005829]; dendrite [GO:0030425]; dendritic spine [GO:0043197]; extrinsic component of cytoplasmic side of plasma membrane [GO:0031234]; focal adhesion [GO:0005925]; glutamatergic synapse [GO:0098978]; growth cone [GO:0030426]; lamellipodium [GO:0030027]; m…	activation of GTPase activity [GO:0090630]; activation of Janus kinase activity [GO:0042976]; adaptive immune response [GO:0002250]; apoptotic process [GO:0006915]; blood vessel endothelial cell migration [GO:0043534]; bone resorption [GO:0045453]; cell differentiation [GO:0030154]; cell surface receptor signaling pathway [GO:0007166]; cellular defense response [GO:0006968]; cellular response to …	Protein kinase superfamily, Tyr protein kinase family, FAK subfamily	P05067; P06241; O15259; O75161; Q7L0Q8; P12931
4nra	Q9UIF8	0.587567	6.2792	AHHaromR	4		BAZ2B_HUMAN	Bromodomain adjacent to zinc finger domain protein 2B (hWALp4)	BAZ2B KIAA1476			nucleus [GO:0005634]	DNA binding [GO:0003677]; metal ion binding [GO:0046872]	nucleus [GO:0005634]; DNA binding [GO:0003677]; metal ion binding [GO:0046872]; chromatin remodeling [GO:0006338]; regulation of transcription by RNA polymerase II [GO:0006357]	chromatin remodeling [GO:0006338]; regulation of transcription by RNA polymerase II [GO:0006357]	WAL family	Q96GX9; Q86UB2; Q8NHQ1; P56545-3; P51116; Q08379; Q6NT76; O75031; Q0VAM2-3; Q15019-3; Q9UBB9; Q12933; P56545-3; P51116; Q96MF2; O43829; Q96BR9
4oj4	P37231	0.577672	6.2792	AAHaromHarom	4		PPARG_HUMAN	Peroxisome proliferator-activated receptor gamma (PPAR-gamma) (Nuclear receptor subfamily 1 group C member 3)	PPARG NR1C3		DISEASE: Note=Defects in PPARG can lead to type 2 insulin-resistant diabetes and hyptertension. PPARG mutations may be associated with colon cancer. {ECO:0000269|PubMed:10394368}.; DISEASE: Obesity (OBESITY) [MIM:601665]: A condition characterized by an increase of body weight beyond the limitation of skeletal and physical requirements, as the result of excessive accumulation of body fat. {ECO:00…	chromatin [GO:0000785]; cytosol [GO:0005829]; intracellular membrane-bounded organelle [GO:0043231]; nucleoplasm [GO:0005654]; nucleus [GO:0005634]; receptor complex [GO:0043235]; RNA polymerase II transcription regulator complex [GO:0090575]	alpha-actinin binding [GO:0051393]; arachidonic acid binding [GO:0050544]; chromatin binding [GO:0003682]; DNA binding [GO:0003677]; DNA binding domain binding [GO:0050692]; DNA-binding transcription factor activity [GO:0003700]; DNA-binding transcription factor activity, RNA polymerase II-specific [GO:0000981]; DNA-binding transcription factor binding [GO:0140297]; DNA-binding transcription repr…	chromatin [GO:0000785]; cytosol [GO:0005829]; intracellular membrane-bounded organelle [GO:0043231]; nucleoplasm [GO:0005654]; nucleus [GO:0005634]; receptor complex [GO:0043235]; RNA polymerase II transcription regulator complex [GO:0090575]; alpha-actinin binding [GO:0051393]; arachidonic acid binding [GO:0050544]; chromatin binding [GO:0003682]; DNA binding [GO:0003677]; DNA binding domain bin…	activation of cysteine-type endopeptidase activity involved in apoptotic process [GO:0006919]; BMP signaling pathway [GO:0030509]; cell differentiation [GO:0030154]; cell fate commitment [GO:0045165]; cell maturation [GO:0048469]; cellular response to hypoxia [GO:0071456]; cellular response to insulin stimulus [GO:0032869]; cellular response to low-density lipoprotein particle stimulus [GO:007140…	Nuclear hormone receptor family, NR1 subfamily	Q8NFM4; P10909; O60869; Q9BWX5; P42858; P45984; O75376; P55055-1; Q13133; P37231; Q9UBK2; P10276; P19793; P28702; Q96EB6; Q6STE5-1; Q6STE5-2; P37231-1; P19793; Q00535
3fzm	Q99933	0.563491	6.2107	AAHaromR	4		BAG1_HUMAN	BAG family molecular chaperone regulator 1 (BAG-1) (Bcl-2-associated athanogene 1)	BAG1 HAP			cytoplasm [GO:0005737]; cytosol [GO:0005829]; membrane [GO:0016020]; nucleoplasm [GO:0005654]; nucleus [GO:0005634]	adenyl-nucleotide exchange factor activity [GO:0000774]; chaperone binding [GO:0051087]; ubiquitin protein ligase binding [GO:0031625]	cytoplasm [GO:0005737]; cytosol [GO:0005829]; membrane [GO:0016020]; nucleoplasm [GO:0005654]; nucleus [GO:0005634]; adenyl-nucleotide exchange factor activity [GO:0000774]; chaperone binding [GO:0051087]; ubiquitin protein ligase binding [GO:0031625]; apoptotic process [GO:0006915]; cell surface receptor signaling pathway [GO:0007166]; chaperone cofactor-dependent protein refolding [GO:0051085];…	apoptotic process [GO:0006915]; cell surface receptor signaling pathway [GO:0007166]; chaperone cofactor-dependent protein refolding [GO:0051085]; negative regulation of apoptotic process [GO:0043066]; protein stabilization [GO:0050821]		P11142; Q96IS6; Q15773; Q13200; Q9UNE7; P36406; P14373; Q53FC7; Q96BE0
3fzm	P11142	0.563491	6.2107	AAHaromR	4		HSP7C_HUMAN	Heat shock cognate 71 kDa protein (EC 3.6.4.10) (Heat shock 70 kDa protein 8) (Lipopolysaccharide-associated protein 1) (LAP-1) (LPS-associated protein 1)	HSPA8 HSC70 HSP73 HSPA10			autophagosome [GO:0005776]; blood microparticle [GO:0072562]; chaperone complex [GO:0101031]; clathrin-sculpted gamma-aminobutyric acid transport vesicle membrane [GO:0061202]; cytoplasm [GO:0005737]; cytosol [GO:0005829]; dendrite [GO:0030425]; extracellular exosome [GO:0070062]; extracellular region [GO:0005576]; extracellular space [GO:0005615]; ficolin-1-rich granule lumen [GO:1904813]; focal…	ATP binding [GO:0005524]; ATP hydrolysis activity [GO:0016887]; ATP-dependent protein disaggregase activity [GO:0140545]; ATP-dependent protein folding chaperone [GO:0140662]; C3HC4-type RING finger domain binding [GO:0055131]; cadherin binding [GO:0045296]; chaperone binding [GO:0051087]; clathrin-uncoating ATPase activity [GO:1990833]; enzyme binding [GO:0019899]; G protein-coupled receptor bin…	autophagosome [GO:0005776]; blood microparticle [GO:0072562]; chaperone complex [GO:0101031]; clathrin-sculpted gamma-aminobutyric acid transport vesicle membrane [GO:0061202]; cytoplasm [GO:0005737]; cytosol [GO:0005829]; dendrite [GO:0030425]; extracellular exosome [GO:0070062]; extracellular region [GO:0005576]; extracellular space [GO:0005615]; ficolin-1-rich granule lumen [GO:1904813]; focal…	ATP metabolic process [GO:0046034]; cellular response to starvation [GO:0009267]; cellular response to steroid hormone stimulus [GO:0071383]; cellular response to unfolded protein [GO:0034620]; chaperone cofactor-dependent protein refolding [GO:0051085]; chaperone-mediated autophagy [GO:0061684]; chaperone-mediated autophagy translocation complex disassembly [GO:1904764]; late endosomal microauto…	Heat shock protein 70 family	P60709; Q9GZX7; P05067; P49407; P32121; Q9NQ11; P54253; Q99933; O95816; O95429; P00533; Q9BQI3; O14976; P01893; P34932; Q9NZL4; P42858; PRO_0000015820 [P01308]; P05412; P00338; Q5S007; P10636; P10636-6; P40692; P14598; O60260-5; Q15428; Q9UNE7; P61764; Q8TDR0; O00635; Q8AZK7; P03485; PRO_0000045603 [Q99IB8]; Q9UNE7-1
3tjs	P08684	0.482263	6.2792	AAHaromHarom	4		CP3A4_HUMAN	Cytochrome P450 3A4 (EC 1.14.14.1) (1,4-cineole 2-exo-monooxygenase) (1,8-cineole 2-exo-monooxygenase) (EC 1.14.14.56) (Albendazole monooxygenase (sulfoxide-forming)) (EC 1.14.14.73) (Albendazole sulfoxidase) (CYPIIIA3) (CYPIIIA4) (Cholesterol 25-hydroxylase) (Cytochrome P450 3A3) (Cytochrome P450 HLp) (Cytochrome P450 NF-25) (Cytochrome P450-PCN1) (Nifedipine oxidase) (Quinine 3-monooxygenase) (…	CYP3A4 CYP3A3	PATHWAY: Steroid hormone biosynthesis. {ECO:0000269|PubMed:11555828, ECO:0000269|PubMed:12865317}.; PATHWAY: Cofactor metabolism; retinol metabolism. {ECO:0000269|PubMed:10681376}.; PATHWAY: Steroid metabolism; cholesterol metabolism. {ECO:0000269|PubMed:21576599}.; PATHWAY: Lipid metabolism; fatty acid metabolism. {ECO:0000269|PubMed:19965576}.	DISEASE: Vitamin D-dependent rickets 3 (VDDR3) [MIM:619073]: An autosomal dominant disorder of vitamin D metabolism resulting in early-onset rickets, reduced serum levels of the vitamin D metabolites 25-hydroxyvitamin D and 1,25-dihydroxyvitamin D, and deficient responsiveness to parent and activated forms of vitamin D. {ECO:0000269|PubMed:29461981}. Note=The gene represented in this entry is inv…	cytoplasm [GO:0005737]; endoplasmic reticulum membrane [GO:0005789]; intracellular membrane-bounded organelle [GO:0043231]	1,8-cineole 2-exo-monooxygenase activity [GO:0102320]; 1-alpha,25-dihydroxyvitamin D3 23-hydroxylase activity [GO:0062181]; anandamide 11,12 epoxidase activity [GO:0062188]; anandamide 14,15 epoxidase activity [GO:0062189]; anandamide 8,9 epoxidase activity [GO:0062187]; aromatase activity [GO:0070330]; caffeine oxidase activity [GO:0034875]; enzyme binding [GO:0019899]; estrogen 16-alpha-hydroxy…	cytoplasm [GO:0005737]; endoplasmic reticulum membrane [GO:0005789]; intracellular membrane-bounded organelle [GO:0043231]; 1,8-cineole 2-exo-monooxygenase activity [GO:0102320]; 1-alpha,25-dihydroxyvitamin D3 23-hydroxylase activity [GO:0062181]; anandamide 11,12 epoxidase activity [GO:0062188]; anandamide 14,15 epoxidase activity [GO:0062189]; anandamide 8,9 epoxidase activity [GO:0062187]; aro…	aflatoxin metabolic process [GO:0046222]; alkaloid catabolic process [GO:0009822]; androgen metabolic process [GO:0008209]; cholesterol metabolic process [GO:0008203]; estrogen metabolic process [GO:0008210]; heterocycle metabolic process [GO:0046483]; lipid hydroxylation [GO:0002933]; lipid metabolic process [GO:0006629]; long-chain fatty acid biosynthetic process [GO:0042759]; monoterpenoid met…	Cytochrome P450 family	O15287; Q6ZQX7-4
4a9o	P25440	0.462907	6.3478	AHHHarom	4		BRD2_HUMAN	Bromodomain-containing protein 2 (O27.1.1) (Really interesting new gene 3 protein)	BRD2 KIAA9001 RING3			chromatin [GO:0000785]; cytoplasm [GO:0005737]; nuclear speck [GO:0016607]; nucleoplasm [GO:0005654]; nucleus [GO:0005634]	chromatin binding [GO:0003682]; lysine-acetylated histone binding [GO:0070577]; protein serine/threonine kinase activity [GO:0004674]	chromatin [GO:0000785]; cytoplasm [GO:0005737]; nuclear speck [GO:0016607]; nucleoplasm [GO:0005654]; nucleus [GO:0005634]; chromatin binding [GO:0003682]; lysine-acetylated histone binding [GO:0070577]; protein serine/threonine kinase activity [GO:0004674]; chromatin remodeling [GO:0006338]; neural tube closure [GO:0001843]; nucleosome assembly [GO:0006334]; protein phosphorylation [GO:0006468];…	chromatin remodeling [GO:0006338]; neural tube closure [GO:0001843]; nucleosome assembly [GO:0006334]; protein phosphorylation [GO:0006468]; regulation of DNA-templated transcription [GO:0006355]; regulation of transcription by RNA polymerase II [GO:0006357]; spermatogenesis [GO:0007283]		P62805; Q13761
4hmn	P42330	0.462675	4.6959	AHHHR	5	0.508032	AK1C3_HUMAN	Aldo-keto reductase family 1 member C3 (EC 1.1.1.-) (EC 1.1.1.210) (EC 1.1.1.53) (EC 1.1.1.62) (17-beta-hydroxysteroid dehydrogenase type 5) (17-beta-HSD 5) (3-alpha-HSD type II, brain) (3-alpha-hydroxysteroid dehydrogenase type 2) (3-alpha-HSD type 2) (EC 1.1.1.357) (Chlordecone reductase homolog HAKRb) (Dihydrodiol dehydrogenase 3) (DD-3) (DD3) (Dihydrodiol dehydrogenase type I) (HA1753) (Prost…	AKR1C3 DDH1 HSD17B5 KIAA0119 PGFS	PATHWAY: Steroid metabolism. {ECO:0000269|PubMed:14672942}.		cytoplasm [GO:0005737]; cytosol [GO:0005829]; extracellular exosome [GO:0070062]; nucleus [GO:0005634]	15-hydroxyprostaglandin-D dehydrogenase (NADP+) activity [GO:0047020]; 17-beta-hydroxysteroid dehydrogenase (NAD+) activity [GO:0044594]; 5alpha-androstane-3beta,17beta-diol dehydrogenase activity [GO:0047024]; alditol:NADP+ 1-oxidoreductase activity [GO:0004032]; aldo-keto reductase (NADP) activity [GO:0004033]; androstan-3-alpha,17-beta-diol dehydrogenase activity [GO:0047044]; androsterone deh…	cytoplasm [GO:0005737]; cytosol [GO:0005829]; extracellular exosome [GO:0070062]; nucleus [GO:0005634]; 15-hydroxyprostaglandin-D dehydrogenase (NADP+) activity [GO:0047020]; 17-beta-hydroxysteroid dehydrogenase (NAD+) activity [GO:0044594]; 5alpha-androstane-3beta,17beta-diol dehydrogenase activity [GO:0047024]; alditol:NADP+ 1-oxidoreductase activity [GO:0004032]; aldo-keto reductase (NADP) act…	cellular response to cadmium ion [GO:0071276]; cellular response to calcium ion [GO:0071277]; cellular response to corticosteroid stimulus [GO:0071384]; cellular response to jasmonic acid stimulus [GO:0071395]; cellular response to prostaglandin D stimulus [GO:0071799]; cellular response to prostaglandin stimulus [GO:0071379]; cellular response to reactive oxygen species [GO:0034614]; cellular re…	Aldo/keto reductase family
1y2k	Q08499	0.380157	3.1125	AHHHHaromR	6		PDE4D_HUMAN	cAMP-specific 3',5'-cyclic phosphodiesterase 4D (EC 3.1.4.53) (DPDE3) (PDE43)	PDE4D DPDE3	PATHWAY: Purine metabolism; 3',5'-cyclic AMP degradation; AMP from 3',5'-cyclic AMP: step 1/1. {ECO:0000269|PubMed:9371713}.	DISEASE: Note=Genetic variations in PDE4D might be associated with susceptibility to stroke. PubMed:17006457 states that association with stroke has to be considered with caution. {ECO:0000269|PubMed:17006457}.; DISEASE: Acrodysostosis 2, with or without hormone resistance (ACRDYS2) [MIM:614613]: A pleiotropic disorder characterized by skeletal, endocrine, and neurological abnormalities. Skeletal…	apical plasma membrane [GO:0016324]; calcium channel complex [GO:0034704]; cytosol [GO:0005829]; membrane [GO:0016020]; microtubule organizing center [GO:0005815]; nucleus [GO:0005634]; perinuclear region of cytoplasm [GO:0048471]; plasma membrane [GO:0005886]; voltage-gated calcium channel complex [GO:0005891]	3',5'-cyclic-AMP phosphodiesterase activity [GO:0004115]; 3',5'-cyclic-nucleotide phosphodiesterase activity [GO:0004114]; ATPase binding [GO:0051117]; beta-2 adrenergic receptor binding [GO:0031698]; cAMP binding [GO:0030552]; enzyme binding [GO:0019899]; heterocyclic compound binding [GO:1901363]; metal ion binding [GO:0046872]; scaffold protein binding [GO:0097110]; transmembrane transporter b…	apical plasma membrane [GO:0016324]; calcium channel complex [GO:0034704]; cytosol [GO:0005829]; membrane [GO:0016020]; microtubule organizing center [GO:0005815]; nucleus [GO:0005634]; perinuclear region of cytoplasm [GO:0048471]; plasma membrane [GO:0005886]; voltage-gated calcium channel complex [GO:0005891]; 3',5'-cyclic-AMP phosphodiesterase activity [GO:0004115]; 3',5'-cyclic-nucleotide pho…	adenylate cyclase-activating adrenergic receptor signaling pathway involved in positive regulation of heart rate [GO:0086024]; adrenergic receptor signaling pathway [GO:0071875]; cAMP catabolic process [GO:0006198]; cAMP-mediated signaling [GO:0019933]; cellular response to cAMP [GO:0071320]; cellular response to epinephrine stimulus [GO:0071872]; establishment of endothelial barrier [GO:0061028]…	Cyclic nucleotide phosphodiesterase family, PDE4 subfamily	P32121; P38432; Q0D2H9; Q08AF8; P43360; Q13077; P32121; P26769; P38432; Q96CV9; Q8IUH5
4qkn	Q9C0B1	0.375409	6.2792	AAHaromHarom	4		FTO_HUMAN	Alpha-ketoglutarate-dependent dioxygenase FTO (Fat mass and obesity-associated protein) (U6 small nuclear RNA (2'-O-methyladenosine-N(6)-)-demethylase FTO) (EC 1.14.11.-) (U6 small nuclear RNA N(6)-methyladenosine-demethylase FTO) (EC 1.14.11.-) (mRNA (2'-O-methyladenosine-N(6)-)-demethylase FTO) (m6A(m)-demethylase FTO) (EC 1.14.11.-) (mRNA N(6)-methyladenosine demethylase FTO) (EC 1.14.11.53) (…	FTO KIAA1752		DISEASE: Growth retardation, developmental delay, and facial dysmorphism (GDFD) [MIM:612938]: A severe polymalformation syndrome characterized by postnatal growth retardation, microcephaly, severe psychomotor delay, functional brain deficits and characteristic facial dysmorphism. In some patients, structural brain malformations, cardiac defects, genital anomalies, and cleft palate are observed. E…	cytoplasm [GO:0005737]; cytosol [GO:0005829]; intracellular membrane-bounded organelle [GO:0043231]; nuclear speck [GO:0016607]; nucleoplasm [GO:0005654]; nucleus [GO:0005634]; plasma membrane [GO:0005886]	DNA-N1-methyladenine dioxygenase activity [GO:0043734]; ferrous iron binding [GO:0008198]; mRNA N6-methyladenosine dioxygenase activity [GO:1990931]; oxidative DNA demethylase activity [GO:0035516]; oxidative RNA demethylase activity [GO:0035515]; transferase activity [GO:0016740]; tRNA demethylase activity [GO:1990984]	cytoplasm [GO:0005737]; cytosol [GO:0005829]; intracellular membrane-bounded organelle [GO:0043231]; nuclear speck [GO:0016607]; nucleoplasm [GO:0005654]; nucleus [GO:0005634]; plasma membrane [GO:0005886]; DNA-N1-methyladenine dioxygenase activity [GO:0043734]; ferrous iron binding [GO:0008198]; mRNA N6-methyladenosine dioxygenase activity [GO:1990931]; oxidative DNA demethylase activity [GO:003…	adipose tissue development [GO:0060612]; DNA dealkylation involved in DNA repair [GO:0006307]; DNA demethylation [GO:0080111]; mRNA destabilization [GO:0061157]; oxidative demethylation [GO:0070989]; oxidative single-stranded DNA demethylation [GO:0035552]; oxidative single-stranded RNA demethylation [GO:0035553]; regulation of brown fat cell differentiation [GO:0090335]; regulation of lipid stor…	Fto family	X5D778; Q9NX04; Q2TAC2-2; Q92989; Q86UW9; O95967; Q9P2W3; O95872; Q14005-2; Q2WGJ6; Q9UI95; Q6PF18; Q9UBU9; Q9NQX0; Q92529; O14787-2; Q6DKK2; A0A024R8A9; Q15935
3dpd	P48736	0.374412	6.2792	AAHHarom	4	0.504329	PK3CG_HUMAN	Phosphatidylinositol 4,5-bisphosphate 3-kinase catalytic subunit gamma isoform (PI3-kinase subunit gamma) (PI3K-gamma) (PI3Kgamma) (PtdIns-3-kinase subunit gamma) (EC 2.7.1.137) (EC 2.7.1.153) (EC 2.7.1.154) (Phosphatidylinositol 4,5-bisphosphate 3-kinase 110 kDa catalytic subunit gamma) (PtdIns-3-kinase subunit p110-gamma) (p110gamma) (Phosphoinositide-3-kinase catalytic gamma polypeptide) (Seri…	PIK3CG	PATHWAY: Phospholipid metabolism; phosphatidylinositol phosphate biosynthesis. {ECO:0000305|PubMed:11277933, ECO:0000305|PubMed:15135396, ECO:0000305|PubMed:16123124}.	DISEASE: Immunodeficiency 97 with autoinflammation (IMD97) [MIM:619802]: An autosomal recessive disorder with variable features. Affected individuals have childhood-onset antibody defects, cytopenias, and T lymphocytic pneumonitis and colitis. Some patients may have features of hemophagocytic lymphohistiocytosis. {ECO:0000269|PubMed:31554793, ECO:0000269|PubMed:33054089}. Note=The disease is caus…	cytoplasm [GO:0005737]; cytosol [GO:0005829]; membrane [GO:0016020]; phosphatidylinositol 3-kinase complex [GO:0005942]; phosphatidylinositol 3-kinase complex, class IA [GO:0005943]; phosphatidylinositol 3-kinase complex, class IB [GO:0005944]; plasma membrane [GO:0005886]	1-phosphatidylinositol-3-kinase activity [GO:0016303]; 1-phosphatidylinositol-4-phosphate 3-kinase activity [GO:0035005]; ATP binding [GO:0005524]; ephrin receptor binding [GO:0046875]; identical protein binding [GO:0042802]; kinase activity [GO:0016301]; phosphatidylinositol 3-kinase activity [GO:0035004]; phosphatidylinositol kinase activity [GO:0052742]; phosphatidylinositol-3,4-bisphosphate 5…	cytoplasm [GO:0005737]; cytosol [GO:0005829]; membrane [GO:0016020]; phosphatidylinositol 3-kinase complex [GO:0005942]; phosphatidylinositol 3-kinase complex, class IA [GO:0005943]; phosphatidylinositol 3-kinase complex, class IB [GO:0005944]; plasma membrane [GO:0005886]; 1-phosphatidylinositol-3-kinase activity [GO:0016303]; 1-phosphatidylinositol-4-phosphate 3-kinase activity [GO:0035005]; AT…	adaptive immune response [GO:0002250]; angiogenesis [GO:0001525]; cell migration [GO:0016477]; cellular response to cAMP [GO:0071320]; dendritic cell chemotaxis [GO:0002407]; endocytosis [GO:0006897]; G protein-coupled receptor signaling pathway [GO:0007186]; hepatocyte apoptotic process [GO:0097284]; immune response [GO:0006955]; inflammatory response [GO:0006954]; innate immune response [GO:004…	PI3/PI4-kinase family	P05067; Q13370; P48736; O02696; Q3U6Q4; P68404-2
3fhx	O00764	0.331162	6.2107	AAAH	4		PDXK_HUMAN	Pyridoxal kinase (EC 2.7.1.35) (Pyridoxine kinase)	PDXK C21orf124 C21orf97 PKH PNK PRED79	PATHWAY: Cofactor metabolism; pyridoxal 5'-phosphate salvage; pyridoxal 5'-phosphate from pyridoxal: step 1/1. {ECO:0000269|PubMed:31187503, ECO:0000305|PubMed:17766369}.; PATHWAY: Cofactor metabolism; pyridoxal 5'-phosphate salvage; pyridoxine 5'-phosphate from pyridoxine: step 1/1. {ECO:0000305|PubMed:17766369}.; PATHWAY: Cofactor metabolism; pyridoxal 5'-phosphate salvage; pyridoxamine 5'-phos…	DISEASE: Neuropathy, hereditary motor and sensory, 6C, with optic atrophy (HMSN6C) [MIM:618511]: An autosomal recessive neurologic disorder characterized by childhood onset of axonal, sensorimotor polyneuropathy affecting mainly the lower limbs, and adult-onset optic atrophy. Clinical features include progressive distal muscle weakness and atrophy, significant standing and walking difficulties, a…	cytosol [GO:0005829]; extracellular exosome [GO:0070062]; extracellular region [GO:0005576]; nucleoplasm [GO:0005654]; nucleus [GO:0005634]; secretory granule lumen [GO:0034774]; specific granule lumen [GO:0035580]	ATP binding [GO:0005524]; lithium ion binding [GO:0031403]; magnesium ion binding [GO:0000287]; potassium ion binding [GO:0030955]; protein homodimerization activity [GO:0042803]; pyridoxal kinase activity [GO:0008478]; pyridoxal phosphate binding [GO:0030170]; sodium ion binding [GO:0031402]; zinc ion binding [GO:0008270]	cytosol [GO:0005829]; extracellular exosome [GO:0070062]; extracellular region [GO:0005576]; nucleoplasm [GO:0005654]; nucleus [GO:0005634]; secretory granule lumen [GO:0034774]; specific granule lumen [GO:0035580]; ATP binding [GO:0005524]; lithium ion binding [GO:0031403]; magnesium ion binding [GO:0000287]; potassium ion binding [GO:0030955]; protein homodimerization activity [GO:0042803]; pyr…	phosphorylation [GO:0016310]; pyridoxal 5'-phosphate salvage [GO:0009443]	Pyridoxine kinase family
4btm	Q5TCY1	0.328157	5.3657	ADHaromHarom	4		TTBK1_HUMAN	Tau-tubulin kinase 1 (EC 2.7.11.1) (Brain-derived tau kinase)	TTBK1 BDTK KIAA1855			cytosol [GO:0005829]; microtubule associated complex [GO:0005875]; neuronal cell body [GO:0043025]; nucleoplasm [GO:0005654]; nucleus [GO:0005634]; perinuclear region of cytoplasm [GO:0048471]	ATP binding [GO:0005524]; protein serine kinase activity [GO:0106310]; protein serine/threonine kinase activity [GO:0004674]; protein tyrosine kinase activity [GO:0004713]; tau protein binding [GO:0048156]; tau-protein kinase activity [GO:0050321]	cytosol [GO:0005829]; microtubule associated complex [GO:0005875]; neuronal cell body [GO:0043025]; nucleoplasm [GO:0005654]; nucleus [GO:0005634]; perinuclear region of cytoplasm [GO:0048471]; ATP binding [GO:0005524]; protein serine kinase activity [GO:0106310]; protein serine/threonine kinase activity [GO:0004674]; protein tyrosine kinase activity [GO:0004713]; tau protein binding [GO:0048156]…	learning or memory [GO:0007611]; negative regulation of gene expression [GO:0010629]; negative regulation of protein binding [GO:0032091]; peptidyl-serine phosphorylation [GO:0018105]; peptidyl-threonine phosphorylation [GO:0018107]; peptidyl-tyrosine phosphorylation [GO:0018108]; positive regulation of astrocyte activation [GO:0061890]; positive regulation of cyclin-dependent protein kinase acti…	Protein kinase superfamily, CK1 Ser/Thr protein kinase family
3rm6	P24941	0.313786	5.2971	AADHarom	4		CDK2_HUMAN	Cyclin-dependent kinase 2 (EC 2.7.11.22) (Cell division protein kinase 2) (p33 protein kinase)	CDK2 CDKN2			Cajal body [GO:0015030]; centrosome [GO:0005813]; chromosome, telomeric region [GO:0000781]; condensed chromosome [GO:0000793]; cyclin A1-CDK2 complex [GO:0097123]; cyclin A2-CDK2 complex [GO:0097124]; cyclin E1-CDK2 complex [GO:0097134]; cyclin E2-CDK2 complex [GO:0097135]; cyclin-dependent protein kinase holoenzyme complex [GO:0000307]; cytoplasm [GO:0005737]; cytosol [GO:0005829]; endosome [GO…	ATP binding [GO:0005524]; cyclin binding [GO:0030332]; cyclin-dependent protein kinase activity [GO:0097472]; cyclin-dependent protein serine/threonine kinase activity [GO:0004693]; magnesium ion binding [GO:0000287]; protein domain specific binding [GO:0019904]; protein serine kinase activity [GO:0106310]; protein serine/threonine kinase activity [GO:0004674]	Cajal body [GO:0015030]; centrosome [GO:0005813]; chromosome, telomeric region [GO:0000781]; condensed chromosome [GO:0000793]; cyclin A1-CDK2 complex [GO:0097123]; cyclin A2-CDK2 complex [GO:0097124]; cyclin E1-CDK2 complex [GO:0097134]; cyclin E2-CDK2 complex [GO:0097135]; cyclin-dependent protein kinase holoenzyme complex [GO:0000307]; cytoplasm [GO:0005737]; cytosol [GO:0005829]; endosome [GO…	cell division [GO:0051301]; cellular response to nitric oxide [GO:0071732]; cellular senescence [GO:0090398]; centriole replication [GO:0007099]; centrosome duplication [GO:0051298]; DNA repair [GO:0006281]; DNA replication [GO:0006260]; DNA-templated transcription [GO:0006351]; G1/S transition of mitotic cell cycle [GO:0000082]; G2/M transition of mitotic cell cycle [GO:0000086]; histone modific…	Protein kinase superfamily, CMGC Ser/Thr protein kinase family, CDC2/CDKX subfamily	P20248; O95067; P24385; P24864; O96020; P51946; P50613; P38936; P46527; Q16667; P61024; Q09472; Q969H0-4; P22607; Q14957; P06396; P01112; Q9Y6K9; O95835; Q8TD08; P06400; Q9BY12; Q9UQR0; Q9UQR0-1; Q9UBI4; Q96PU4; P30274; P51943; P03129; Q08619
4bek	P56817	0.287879	3.7823	DHHHR	5		BACE1_HUMAN	Beta-secretase 1 (EC 3.4.23.46) (Aspartyl protease 2) (ASP2) (Asp 2) (Beta-site amyloid precursor protein cleaving enzyme 1) (Beta-site APP cleaving enzyme 1) (Memapsin-2) (Membrane-associated aspartic protease 2)	BACE1 BACE KIAA1149			axon [GO:0030424]; cell surface [GO:0009986]; dendrite [GO:0030425]; early endosome [GO:0005769]; endoplasmic reticulum lumen [GO:0005788]; endosome [GO:0005768]; endosome membrane [GO:0010008]; Golgi apparatus [GO:0005794]; Golgi-associated vesicle lumen [GO:0070931]; hippocampal mossy fiber to CA3 synapse [GO:0098686]; late endosome [GO:0005770]; lysosome [GO:0005764]; membrane [GO:0016020]; me…	amyloid-beta binding [GO:0001540]; aspartic-type endopeptidase activity [GO:0004190]; beta-aspartyl-peptidase activity [GO:0008798]; endopeptidase activity [GO:0004175]; enzyme binding [GO:0019899]; peptidase activity [GO:0008233]	axon [GO:0030424]; cell surface [GO:0009986]; dendrite [GO:0030425]; early endosome [GO:0005769]; endoplasmic reticulum lumen [GO:0005788]; endosome [GO:0005768]; endosome membrane [GO:0010008]; Golgi apparatus [GO:0005794]; Golgi-associated vesicle lumen [GO:0070931]; hippocampal mossy fiber to CA3 synapse [GO:0098686]; late endosome [GO:0005770]; lysosome [GO:0005764]; membrane [GO:0016020]; me…	amyloid fibril formation [GO:1990000]; amyloid precursor protein catabolic process [GO:0042987]; amyloid-beta formation [GO:0034205]; amyloid-beta metabolic process [GO:0050435]; cellular response to amyloid-beta [GO:1904646]; cellular response to copper ion [GO:0071280]; cellular response to manganese ion [GO:0071287]; detection of mechanical stimulus involved in sensory perception of pain [GO:0…	Peptidase A1 family	O14672; P05067; Q9UJY5; Q9UJY4; Q9NZ52; P10997; Q9Y287; Q03721; P49768; Q9UNH7; Q8BNX1; O95197-3; Q9NQC3-2; Q9NQC3-3
4fv0	P28482	0.280023	4.6959	AAHHaromHarom	5		MK01_HUMAN	Mitogen-activated protein kinase 1 (MAP kinase 1) (MAPK 1) (EC 2.7.11.24) (ERT1) (Extracellular signal-regulated kinase 2) (ERK-2) (MAP kinase isoform p42) (p42-MAPK) (Mitogen-activated protein kinase 2) (MAP kinase 2) (MAPK 2)	MAPK1 ERK2 PRKM1 PRKM2		DISEASE: Noonan syndrome 13 (NS13) [MIM:619087]: A form of Noonan syndrome, a disease characterized by short stature, facial dysmorphic features such as hypertelorism, a downward eyeslant and low-set posteriorly rotated ears, and a high incidence of congenital heart defects and hypertrophic cardiomyopathy. Other features can include a short neck with webbing or redundancy of skin, deafness, motor…	azurophil granule lumen [GO:0035578]; caveola [GO:0005901]; cytoplasm [GO:0005737]; cytoskeleton [GO:0005856]; cytosol [GO:0005829]; early endosome [GO:0005769]; endoplasmic reticulum lumen [GO:0005788]; extracellular region [GO:0005576]; ficolin-1-rich granule lumen [GO:1904813]; focal adhesion [GO:0005925]; Golgi apparatus [GO:0005794]; late endosome [GO:0005770]; microtubule organizing center …	ATP binding [GO:0005524]; DNA binding [GO:0003677]; identical protein binding [GO:0042802]; MAP kinase activity [GO:0004707]; MAP kinase kinase activity [GO:0004708]; phosphatase binding [GO:0019902]; phosphotyrosine residue binding [GO:0001784]; protein serine kinase activity [GO:0106310]; protein serine/threonine kinase activity [GO:0004674]; RNA polymerase II CTD heptapeptide repeat kinase act…	azurophil granule lumen [GO:0035578]; caveola [GO:0005901]; cytoplasm [GO:0005737]; cytoskeleton [GO:0005856]; cytosol [GO:0005829]; early endosome [GO:0005769]; endoplasmic reticulum lumen [GO:0005788]; extracellular region [GO:0005576]; ficolin-1-rich granule lumen [GO:1904813]; focal adhesion [GO:0005925]; Golgi apparatus [GO:0005794]; late endosome [GO:0005770]; microtubule organizing center …	apoptotic process [GO:0006915]; B cell receptor signaling pathway [GO:0050853]; Bergmann glial cell differentiation [GO:0060020]; cardiac neural crest cell development involved in heart development [GO:0061308]; caveolin-mediated endocytosis [GO:0072584]; cell cycle [GO:0007049]; cell surface receptor signaling pathway [GO:0007166]; cellular response to amino acid starvation [GO:0034198]; cellula…	Protein kinase superfamily, CMGC Ser/Thr protein kinase family, MAP kinase subfamily	P05067; P53004; P15882; Q7L5N1; P28562; Q13115; Q16690; Q16828; Q99956; Q9BRK4; Q02750; P28482; Q16539-3; Q99750; Q9BUB5; P35548; Q15121; Q9UPG8; P62487; P35813; Q6NYC8; P25786; A2A3K4; P35236; Q12913; Q15256; Q15256-5; O76064; Q15418; Q15349; P51812; P29353-2; P61764; Q08117-2; Q9Y296; B2RXF5; A0A384NQ31; Q9U1H0; Q05922; P02687; Q8VSP9; P0A2M9; Q69559
4hvi	P52333	0.26604	3.7823	ADHHHarom	5	0.530651	JAK3_HUMAN	Tyrosine-protein kinase JAK3 (EC 2.7.10.2) (Janus kinase 3) (JAK-3) (Leukocyte janus kinase) (L-JAK)	JAK3		DISEASE: Severe combined immunodeficiency autosomal recessive T-cell-negative/B-cell-positive/NK-cell-negative (T(-)B(+)NK(-) SCID) [MIM:600802]: A form of severe combined immunodeficiency (SCID), a genetically and clinically heterogeneous group of rare congenital disorders characterized by impairment of both humoral and cell-mediated immunity, leukopenia, and low or absent antibody levels. Patie…	cytoskeleton [GO:0005856]; cytosol [GO:0005829]; endosome [GO:0005768]; plasma membrane [GO:0005886]	ATP binding [GO:0005524]; cytokine receptor binding [GO:0005126]; growth hormone receptor binding [GO:0005131]; non-membrane spanning protein tyrosine kinase activity [GO:0004715]; protein phosphatase binding [GO:0019903]; protein tyrosine kinase activity [GO:0004713]	cytoskeleton [GO:0005856]; cytosol [GO:0005829]; endosome [GO:0005768]; plasma membrane [GO:0005886]; ATP binding [GO:0005524]; cytokine receptor binding [GO:0005126]; growth hormone receptor binding [GO:0005131]; non-membrane spanning protein tyrosine kinase activity [GO:0004715]; protein phosphatase binding [GO:0019903]; protein tyrosine kinase activity [GO:0004713]; adaptive immune response [G…	adaptive immune response [GO:0002250]; B cell differentiation [GO:0030183]; cell differentiation [GO:0030154]; cytokine-mediated signaling pathway [GO:0019221]; enzyme-linked receptor protein signaling pathway [GO:0007167]; erythrocyte differentiation [GO:0030218]; growth hormone receptor signaling pathway via JAK-STAT [GO:0060397]; innate immune response [GO:0045087]; interleukin-2-mediated sign…	Protein kinase superfamily, Tyr protein kinase family, JAK subfamily	Q07666; Q9UNF1; P55209
4c67	O60885	0.241637	6.3478	AHHaromHarom	4		BRD4_HUMAN	Bromodomain-containing protein 4 (Protein HUNK1)	BRD4 HUNK1		DISEASE: Note=A chromosomal aberration involving BRD4 is found in a rare, aggressive, and lethal carcinoma arising in midline organs of young people. Translocation t(15;19)(q14;p13) with NUTM1 which produces a BRD4-NUTM1 fusion protein. {ECO:0000269|PubMed:11733348, ECO:0000269|PubMed:12543779}.	chromatin [GO:0000785]; chromosome [GO:0005694]; condensed nuclear chromosome [GO:0000794]; nucleoplasm [GO:0005654]; nucleus [GO:0005634]	chromatin binding [GO:0003682]; enzyme binding [GO:0019899]; histone reader activity [GO:0140566]; lysine-acetylated histone binding [GO:0070577]; P-TEFb complex binding [GO:0106140]; p53 binding [GO:0002039]; RNA polymerase II C-terminal domain binding [GO:0099122]; RNA polymerase II CTD heptapeptide repeat kinase activity [GO:0008353]; transcription cis-regulatory region binding [GO:0000976]; t…	chromatin [GO:0000785]; chromosome [GO:0005694]; condensed nuclear chromosome [GO:0000794]; nucleoplasm [GO:0005654]; nucleus [GO:0005634]; chromatin binding [GO:0003682]; enzyme binding [GO:0019899]; histone reader activity [GO:0140566]; lysine-acetylated histone binding [GO:0070577]; P-TEFb complex binding [GO:0106140]; p53 binding [GO:0002039]; RNA polymerase II C-terminal domain binding [GO:0…	cellular response to DNA damage stimulus [GO:0006974]; chromatin remodeling [GO:0006338]; negative regulation by host of viral transcription [GO:0043922]; negative regulation of DNA damage checkpoint [GO:2000002]; positive regulation of DNA-templated transcription [GO:0045893]; positive regulation of G2/M transition of mitotic cell cycle [GO:0010971]; positive regulation of I-kappaB kinase/NF-kap…		Q86YD7; P62993; Q6NYC1; P16333; Q04206; A6NLX3; Q15672; P03120; P04015; P06790; P17383; P10275; O60563; P50750; P62805; Q15672; P03120; P03122
2yej	P07900	0.231097	6.3478	AHHHarom	4		HS90A_HUMAN	Heat shock protein HSP 90-alpha (EC 3.6.4.10) (Heat shock 86 kDa) (HSP 86) (HSP86) (Lipopolysaccharide-associated protein 2) (LAP-2) (LPS-associated protein 2) (Renal carcinoma antigen NY-REN-38)	HSP90AA1 HSP90A HSPC1 HSPCA			apical plasma membrane [GO:0016324]; axonal growth cone [GO:0044295]; basolateral plasma membrane [GO:0016323]; brush border membrane [GO:0031526]; cell surface [GO:0009986]; collagen-containing extracellular matrix [GO:0062023]; cytoplasm [GO:0005737]; cytosol [GO:0005829]; dendritic growth cone [GO:0044294]; endocytic vesicle lumen [GO:0071682]; extracellular exosome [GO:0070062]; extracellular…	ATP binding [GO:0005524]; ATP hydrolysis activity [GO:0016887]; ATP-dependent protein folding chaperone [GO:0140662]; CTP binding [GO:0002135]; dATP binding [GO:0032564]; disordered domain specific binding [GO:0097718]; DNA polymerase binding [GO:0070182]; GTP binding [GO:0005525]; GTPase binding [GO:0051020]; histone deacetylase binding [GO:0042826]; identical protein binding [GO:0042802]; MHC c…	apical plasma membrane [GO:0016324]; axonal growth cone [GO:0044295]; basolateral plasma membrane [GO:0016323]; brush border membrane [GO:0031526]; cell surface [GO:0009986]; collagen-containing extracellular matrix [GO:0062023]; cytoplasm [GO:0005737]; cytosol [GO:0005829]; dendritic growth cone [GO:0044294]; endocytic vesicle lumen [GO:0071682]; extracellular exosome [GO:0070062]; extracellular…	activation of innate immune response [GO:0002218]; axon extension [GO:0048675]; cardiac muscle cell apoptotic process [GO:0010659]; cellular response to heat [GO:0034605]; cellular response to virus [GO:0098586]; central nervous system neuron axonogenesis [GO:0021955]; chaperone-mediated autophagy [GO:0061684]; chaperone-mediated protein complex assembly [GO:0051131]; establishment of cell polari…	Heat shock protein 90 family	Q6UY14-3; O95433; P05067; Q9H0C5; Q9UQM7; Q8IWD4; Q9BV29; Q16543; Q7L3B6; P50750; Q96G23; Q9UHD1; O15111; Q6QEF8-4; Q14194; P35222; Q15438; Q9NR20; P00533; P04626; Q02790; Q13451; Q14318; P06241; Q96LI6-3; P07900; Q6PK50; Q9Y6K9; Q9UHH9; P05412; Q92993-2; Q6VAB6; P06239; Q99558; O43318-2; P00540; P04150; Q8WVJ2; P43034; P53041; P17612; Q8WUY3; Q96QS6; Q15185; P04049; Q13127; Q9H6T3; P61247; P1293…
4jvn	P49888	0.226411	3.1125	AHHHHaromR	6	0.571429	ST1E1_HUMAN	Sulfotransferase 1E1 (ST1E1) (EC 2.8.2.4) (EST-1) (Estrogen sulfotransferase) (Sulfotransferase, estrogen-preferring)	SULT1E1 STE			cytoplasm [GO:0005737]; cytosol [GO:0005829]; nuclear membrane [GO:0031965]	aryl sulfotransferase activity [GO:0004062]; estrone sulfotransferase activity [GO:0004304]; flavonol 3-sulfotransferase activity [GO:0047894]; steroid binding [GO:0005496]; steroid sulfotransferase activity [GO:0050294]; sulfotransferase activity [GO:0008146]	cytoplasm [GO:0005737]; cytosol [GO:0005829]; nuclear membrane [GO:0031965]; aryl sulfotransferase activity [GO:0004062]; estrone sulfotransferase activity [GO:0004304]; flavonol 3-sulfotransferase activity [GO:0047894]; steroid binding [GO:0005496]; steroid sulfotransferase activity [GO:0050294]; sulfotransferase activity [GO:0008146]; 3'-phosphoadenosine 5'-phosphosulfate metabolic process [GO:…	3'-phosphoadenosine 5'-phosphosulfate metabolic process [GO:0050427]; estrogen catabolic process [GO:0006711]; estrogen metabolic process [GO:0008210]; ethanol catabolic process [GO:0006068]; positive regulation of fat cell differentiation [GO:0045600]; steroid metabolic process [GO:0008202]; sulfation [GO:0051923]	Sulfotransferase 1 family	O76083; O76083-2
2h6i	P49354	0.206776	6.2107	AAAH	4		FNTA_HUMAN	Protein farnesyltransferase/geranylgeranyltransferase type-1 subunit alpha (EC 2.5.1.58) (EC 2.5.1.59) (CAAX farnesyltransferase subunit alpha) (FTase-alpha) (Ras proteins prenyltransferase subunit alpha) (Type I protein geranyl-geranyltransferase subunit alpha) (GGTase-I-alpha)	FNTA			CAAX-protein geranylgeranyltransferase complex [GO:0005953]; cytoplasm [GO:0005737]; cytosol [GO:0005829]; microtubule associated complex [GO:0005875]; plasma membrane [GO:0005886]; protein farnesyltransferase complex [GO:0005965]	acetylcholine receptor regulator activity [GO:0030548]; alpha-tubulin binding [GO:0043014]; CAAX-protein geranylgeranyltransferase activity [GO:0004662]; microtubule binding [GO:0008017]; molecular adaptor activity [GO:0060090]; protein farnesyltransferase activity [GO:0004660]; protein geranylgeranyltransferase activity [GO:0004661]; Rab geranylgeranyltransferase activity [GO:0004663]; receptor …	CAAX-protein geranylgeranyltransferase complex [GO:0005953]; cytoplasm [GO:0005737]; cytosol [GO:0005829]; microtubule associated complex [GO:0005875]; plasma membrane [GO:0005886]; protein farnesyltransferase complex [GO:0005965]; acetylcholine receptor regulator activity [GO:0030548]; alpha-tubulin binding [GO:0043014]; CAAX-protein geranylgeranyltransferase activity [GO:0004662]; microtubule b…	neurotransmitter receptor metabolic process [GO:0045213]; positive regulation of deacetylase activity [GO:0090045]; positive regulation of tubulin deacetylation [GO:0090044]; protein farnesylation [GO:0018343]; protein geranylgeranylation [GO:0018344]; skeletal muscle acetylcholine-gated channel clustering [GO:0071340]; transforming growth factor beta receptor signaling pathway [GO:0007179]	Protein prenyltransferase subunit alpha family	O00189; P49356; P53609
2h6i	P49356	0.206776	6.2107	AAAH	4		FNTB_HUMAN	Protein farnesyltransferase subunit beta (FTase-beta) (EC 2.5.1.58) (CAAX farnesyltransferase subunit beta) (Ras proteins prenyltransferase subunit beta)	FNTB			cytosol [GO:0005829]; microtubule associated complex [GO:0005875]; protein farnesyltransferase complex [GO:0005965]	protein farnesyltransferase activity [GO:0004660]; zinc ion binding [GO:0008270]	cytosol [GO:0005829]; microtubule associated complex [GO:0005875]; protein farnesyltransferase complex [GO:0005965]; protein farnesyltransferase activity [GO:0004660]; zinc ion binding [GO:0008270]; lipid metabolic process [GO:0006629]; protein farnesylation [GO:0018343]; protein prenylation [GO:0018342]	lipid metabolic process [GO:0006629]; protein farnesylation [GO:0018343]; protein prenylation [GO:0018342]	Protein prenyltransferase subunit beta family	P21549; Q9BWW8; Q8N5M1; Q8N4L8; G5E9A7; P49354; P31273; A5PL33-2; Q9H0W8; Q7Z699; O43711
2wmu	O14757	0.203407	5.3657	ADHHarom	4		CHK1_HUMAN	Serine/threonine-protein kinase Chk1 (EC 2.7.11.1) (CHK1 checkpoint homolog) (Cell cycle checkpoint kinase) (Checkpoint kinase-1)	CHEK1 CHK1			centrosome [GO:0005813]; chromatin [GO:0000785]; condensed nuclear chromosome [GO:0000794]; cytoplasm [GO:0005737]; cytosol [GO:0005829]; extracellular space [GO:0005615]; intracellular membrane-bounded organelle [GO:0043231]; nucleoplasm [GO:0005654]; nucleus [GO:0005634]; protein-containing complex [GO:0032991]; replication fork [GO:0005657]	ATP binding [GO:0005524]; histone H3T11 kinase activity [GO:0035402]; protein domain specific binding [GO:0019904]; protein kinase activity [GO:0004672]; protein serine kinase activity [GO:0106310]; protein serine/threonine kinase activity [GO:0004674]	centrosome [GO:0005813]; chromatin [GO:0000785]; condensed nuclear chromosome [GO:0000794]; cytoplasm [GO:0005737]; cytosol [GO:0005829]; extracellular space [GO:0005615]; intracellular membrane-bounded organelle [GO:0043231]; nucleoplasm [GO:0005654]; nucleus [GO:0005634]; protein-containing complex [GO:0032991]; replication fork [GO:0005657]; ATP binding [GO:0005524]; histone H3T11 kinase activ…	apoptotic process [GO:0006915]; apoptotic process involved in development [GO:1902742]; cellular response to caffeine [GO:0071313]; cellular response to DNA damage stimulus [GO:0006974]; cellular response to mechanical stimulus [GO:0071260]; DNA damage checkpoint signaling [GO:0000077]; DNA repair [GO:0006281]; DNA replication [GO:0006260]; G2/M transition of mitotic cell cycle [GO:0000086]; inne…	Protein kinase superfamily, CAMK Ser/Thr protein kinase family, NIM1 subfamily	P38398; P30307; Q9HAW4; Q9UJM3; P08238; O00255; Q06609; P06400; Q9HCE7-2; Q9UNS1; P61981
3ac1	P06239	0.201897	5.3657	ADHaromHarom	4		LCK_HUMAN	Tyrosine-protein kinase Lck (EC 2.7.10.2) (Leukocyte C-terminal Src kinase) (LSK) (Lymphocyte cell-specific protein-tyrosine kinase) (Protein YT16) (Proto-oncogene Lck) (T cell-specific protein-tyrosine kinase) (p56-LCK)	LCK		DISEASE: Note=A chromosomal aberration involving LCK is found in leukemias. Translocation t(1;7)(p34;q34) with TCRB.; DISEASE: Immunodeficiency 22 (IMD22) [MIM:615758]: A primary immunodeficiency characterized by T-cell dysfunction. Affected individuals present with lymphopenia, recurrent infections, severe diarrhea, and failure to thrive. {ECO:0000269|PubMed:22985903}. Note=The disease is caused…	cytosol [GO:0005829]; extracellular exosome [GO:0070062]; extrinsic component of cytoplasmic side of plasma membrane [GO:0031234]; immunological synapse [GO:0001772]; membrane raft [GO:0045121]; pericentriolar material [GO:0000242]; plasma membrane [GO:0005886]	ATP binding [GO:0005524]; ATPase binding [GO:0051117]; CD4 receptor binding [GO:0042609]; CD8 receptor binding [GO:0042610]; identical protein binding [GO:0042802]; non-membrane spanning protein tyrosine kinase activity [GO:0004715]; phosphatidylinositol 3-kinase binding [GO:0043548]; phospholipase activator activity [GO:0016004]; phospholipase binding [GO:0043274]; phosphotyrosine residue bindin…	cytosol [GO:0005829]; extracellular exosome [GO:0070062]; extrinsic component of cytoplasmic side of plasma membrane [GO:0031234]; immunological synapse [GO:0001772]; membrane raft [GO:0045121]; pericentriolar material [GO:0000242]; plasma membrane [GO:0005886]; ATP binding [GO:0005524]; ATPase binding [GO:0051117]; CD4 receptor binding [GO:0042609]; CD8 receptor binding [GO:0042610]; identical p…	activation of cysteine-type endopeptidase activity involved in apoptotic process [GO:0006919]; B cell receptor signaling pathway [GO:0050853]; cell differentiation [GO:0030154]; cellular zinc ion homeostasis [GO:0006882]; Fc-gamma receptor signaling pathway [GO:0038094]; hemopoiesis [GO:0030097]; innate immune response [GO:0045087]; intracellular signal transduction [GO:0035556]; leukocyte migrat…	Protein kinase superfamily, Tyr protein kinase family, SRC subfamily	O14672; Q13444; P10275; P20749; P01730; Q5VV42; P36888; Q13480; P23771; P07900; P08238; Q07666; P10721; O43561; P06239; Q9BRK4; Q9H204; P08581; P04150; Q04759; Q9Y2R2; P29350; P08575; Q9NP31; P43405; Q8N1K5-1; P0CG48; P43403; P22575; Q9YJQ8; Q96DX5; Q9BXJ5; Q9GZU7; A8MTA8-2; Q8NI38; I6L996; Q92753-1; Q9UPQ4-2; Q5T6F2
1n4s	P01116	0.197968	6.2792	AAHH	4		RASK_HUMAN	GTPase KRas (EC 3.6.5.2) (K-Ras 2) (Ki-Ras) (c-K-ras) (c-Ki-ras) [Cleaved into: GTPase KRas, N-terminally processed]	KRAS KRAS2 RASK2		DISEASE: Leukemia, acute myelogenous (AML) [MIM:601626]: A subtype of acute leukemia, a cancer of the white blood cells. AML is a malignant disease of bone marrow characterized by maturational arrest of hematopoietic precursors at an early stage of development. Clonal expansion of myeloid blasts occurs in bone marrow, blood, and other tissue. Myelogenous leukemias develop from changes in cells th…	cytoplasm [GO:0005737]; cytosol [GO:0005829]; endoplasmic reticulum membrane [GO:0005789]; extrinsic component of cytoplasmic side of plasma membrane [GO:0031234]; focal adhesion [GO:0005925]; Golgi membrane [GO:0000139]; membrane [GO:0016020]; mitochondrial outer membrane [GO:0005741]; plasma membrane [GO:0005886]	G protein activity [GO:0003925]; GDP binding [GO:0019003]; GTP binding [GO:0005525]; GTPase activity [GO:0003924]; identical protein binding [GO:0042802]; protein serine/threonine kinase activator activity [GO:0043539]; protein-containing complex binding [GO:0044877]; protein-membrane adaptor activity [GO:0043495]	cytoplasm [GO:0005737]; cytosol [GO:0005829]; endoplasmic reticulum membrane [GO:0005789]; extrinsic component of cytoplasmic side of plasma membrane [GO:0031234]; focal adhesion [GO:0005925]; Golgi membrane [GO:0000139]; membrane [GO:0016020]; mitochondrial outer membrane [GO:0005741]; plasma membrane [GO:0005886]; G protein activity [GO:0003925]; GDP binding [GO:0019003]; GTP binding [GO:000552…	actin cytoskeleton organization [GO:0030036]; endocrine signaling [GO:0038002]; epithelial tube branching involved in lung morphogenesis [GO:0060441]; forebrain astrocyte development [GO:0021897]; glial cell proliferation [GO:0014009]; homeostasis of number of cells within a tissue [GO:0048873]; MAPK cascade [GO:0000165]; negative regulation of epithelial cell differentiation [GO:0030857]; negati…	Small GTPase superfamily, Ras family	Q96II5; Q99755; P04049; P50749; P05067; P01116-2; P04049; Q04631
4bbx	Q9Y233	0.191922	4.6959	AHHHaromR	5		PDE10_HUMAN	cAMP and cAMP-inhibited cGMP 3',5'-cyclic phosphodiesterase 10A (EC 3.1.4.17)	PDE10A	PATHWAY: Purine metabolism; 3',5'-cyclic AMP degradation; AMP from 3',5'-cyclic AMP: step 1/1. {ECO:0000269|PubMed:10373451, ECO:0000269|PubMed:10393245, ECO:0000269|PubMed:16330539, ECO:0000269|PubMed:17389385, ECO:0000269|PubMed:27058447}.; PATHWAY: Purine metabolism; 3',5'-cyclic GMP degradation; GMP from 3',5'-cyclic GMP: step 1/1. {ECO:0000269|PubMed:10373451, ECO:0000269|PubMed:10393245, EC…	DISEASE: Dyskinesia, limb and orofacial, infantile-onset (IOLOD) [MIM:616921]: An autosomal recessive, early-onset hyperkinetic movement disorder characterized by axial hypotonia, dyskinesia of the limbs and trunk, orofacial dyskinesia, drooling, and dysarthria. The severity of the hyperkinesis is variable. {ECO:0000269|PubMed:27058446}. Note=The disease is caused by variants affecting the gene r…	cytosol [GO:0005829]	3',5'-cyclic-AMP phosphodiesterase activity [GO:0004115]; 3',5'-cyclic-GMP phosphodiesterase activity [GO:0047555]; 3',5'-cyclic-nucleotide phosphodiesterase activity [GO:0004114]; cAMP binding [GO:0030552]; cGMP binding [GO:0030553]; cGMP-stimulated cyclic-nucleotide phosphodiesterase activity [GO:0004118]; metal ion binding [GO:0046872]	cytosol [GO:0005829]; 3',5'-cyclic-AMP phosphodiesterase activity [GO:0004115]; 3',5'-cyclic-GMP phosphodiesterase activity [GO:0047555]; 3',5'-cyclic-nucleotide phosphodiesterase activity [GO:0004114]; cAMP binding [GO:0030552]; cGMP binding [GO:0030553]; cGMP-stimulated cyclic-nucleotide phosphodiesterase activity [GO:0004118]; metal ion binding [GO:0046872]; cAMP catabolic process [GO:0006198]…	cAMP catabolic process [GO:0006198]; cGMP catabolic process [GO:0046069]; negative regulation of cGMP-mediated signaling [GO:0010754]; signal transduction [GO:0007165]	Cyclic nucleotide phosphodiesterase family
2w98	Q8N8N7	0.162024	6.2792	AHHaromR	4		PTGR2_HUMAN	Prostaglandin reductase 2 (PRG-2) (EC 1.3.1.48) (15-oxoprostaglandin 13-reductase) (Zinc-binding alcohol dehydrogenase domain-containing protein 1)	PTGR2 ZADH1			cytoplasm [GO:0005737]	13-prostaglandin reductase activity [GO:0036132]; 15-oxoprostaglandin 13-oxidase activity [GO:0047522]	cytoplasm [GO:0005737]; 13-prostaglandin reductase activity [GO:0036132]; 15-oxoprostaglandin 13-oxidase activity [GO:0047522]; prostaglandin metabolic process [GO:0006693]	prostaglandin metabolic process [GO:0006693]	NADP-dependent oxidoreductase L4BD family	Q7L4P6
4ach	P49841	0.143205	5.4343	DHHaromHarom	4		GSK3B_HUMAN	Glycogen synthase kinase-3 beta (GSK-3 beta) (EC 2.7.11.26) (Serine/threonine-protein kinase GSK3B) (EC 2.7.11.1)	GSK3B			axon [GO:0030424]; beta-catenin destruction complex [GO:0030877]; centrosome [GO:0005813]; cytoplasm [GO:0005737]; cytosol [GO:0005829]; dendrite [GO:0030425]; glutamatergic synapse [GO:0098978]; mitochondrion [GO:0005739]; nucleoplasm [GO:0005654]; nucleus [GO:0005634]; plasma membrane [GO:0005886]; postsynapse [GO:0098794]; presynapse [GO:0098793]; Wnt signalosome [GO:1990909]	ATP binding [GO:0005524]; beta-catenin binding [GO:0008013]; dynactin binding [GO:0034452]; kinase activity [GO:0016301]; NF-kappaB binding [GO:0051059]; p53 binding [GO:0002039]; protease binding [GO:0002020]; protein kinase A catalytic subunit binding [GO:0034236]; protein kinase activity [GO:0004672]; protein kinase binding [GO:0019901]; protein serine kinase activity [GO:0106310]; protein ser…	axon [GO:0030424]; beta-catenin destruction complex [GO:0030877]; centrosome [GO:0005813]; cytoplasm [GO:0005737]; cytosol [GO:0005829]; dendrite [GO:0030425]; glutamatergic synapse [GO:0098978]; mitochondrion [GO:0005739]; nucleoplasm [GO:0005654]; nucleus [GO:0005634]; plasma membrane [GO:0005886]; postsynapse [GO:0098794]; presynapse [GO:0098793]; Wnt signalosome [GO:1990909]; ATP binding [GO:…	beta-catenin destruction complex disassembly [GO:1904886]; cellular response to amyloid-beta [GO:1904646]; cellular response to interleukin-3 [GO:0036016]; cellular response to retinoic acid [GO:0071300]; circadian rhythm [GO:0007623]; dopamine receptor signaling pathway [GO:0007212]; epithelial to mesenchymal transition [GO:0001837]; ER overload response [GO:0006983]; establishment of cell polar…	Protein kinase superfamily, CMGC Ser/Thr protein kinase family, GSK-3 subfamily	P31749; P31751; PRO_0000000093 [P05067]; O15169; Q96G01; O75952-3; O75952-5; P35222; Q5VWQ8; Q5VWQ8-2; Q9NYF0; O75398; Q13144; Q92837; P13807; O75581; Q5S007; P10636; P10636-8; Q14596; Q8N4C6; P17612; Q01201; O95863; P37840; Q6J9G0; P04637; Q14134; O95071; P63104; Q8IX07; O35625; Q14DJ8; Q02248; Q811T9; P63085; P0DTC9; P05067; P35637; P01106; Q8BMD2-1
3cgf	P53779	0.143185	6.3478	AHHaromHarom	4		MK10_HUMAN	Mitogen-activated protein kinase 10 (MAP kinase 10) (MAPK 10) (EC 2.7.11.24) (MAP kinase p49 3F12) (Stress-activated protein kinase 1b) (SAPK1b) (Stress-activated protein kinase JNK3) (c-Jun N-terminal kinase 3)	MAPK10 JNK3 JNK3A PRKM10 SAPK1B		DISEASE: Note=A chromosomal aberration involving MAPK10 has been found in a single patient with pharmacoresistant epileptic encephalopathy. Translocation t(Y;4)(q11.2;q21) which causes MAPK10 truncation. {ECO:0000269|PubMed:16249883}.	cytoplasm [GO:0005737]; cytosol [GO:0005829]; mitochondrion [GO:0005739]; nucleoplasm [GO:0005654]; nucleus [GO:0005634]; plasma membrane [GO:0005886]	ATP binding [GO:0005524]; JUN kinase activity [GO:0004705]; MAP kinase activity [GO:0004707]; MAP kinase kinase activity [GO:0004708]; protein serine kinase activity [GO:0106310]; protein serine/threonine kinase activity [GO:0004674]	cytoplasm [GO:0005737]; cytosol [GO:0005829]; mitochondrion [GO:0005739]; nucleoplasm [GO:0005654]; nucleus [GO:0005634]; plasma membrane [GO:0005886]; ATP binding [GO:0005524]; JUN kinase activity [GO:0004705]; MAP kinase activity [GO:0004707]; MAP kinase kinase activity [GO:0004708]; protein serine kinase activity [GO:0106310]; protein serine/threonine kinase activity [GO:0004674]; cellular sen…	cellular senescence [GO:0090398]; Fc-epsilon receptor signaling pathway [GO:0038095]; intracellular signal transduction [GO:0035556]; JNK cascade [GO:0007254]; protein phosphorylation [GO:0006468]; regulation of circadian rhythm [GO:0042752]; regulation of DNA-binding transcription factor activity [GO:0051090]; response to light stimulus [GO:0009416]; rhythmic process [GO:0048511]; signal transdu…	Protein kinase superfamily, CMGC Ser/Thr protein kinase family, MAP kinase subfamily	P49407; P05412; P17535; Q04206
4lu3	Q9ULX7	0.1419	6.1421	AAAA	4		CAH14_HUMAN	Carbonic anhydrase 14 (EC 4.2.1.1) (Carbonate dehydratase XIV) (Carbonic anhydrase XIV) (CA-XIV)	CA14 UNQ690/PRO1335			membrane [GO:0016020]; plasma membrane [GO:0005886]	carbonate dehydratase activity [GO:0004089]; hydro-lyase activity [GO:0016836]; zinc ion binding [GO:0008270]	membrane [GO:0016020]; plasma membrane [GO:0005886]; carbonate dehydratase activity [GO:0004089]; hydro-lyase activity [GO:0016836]; zinc ion binding [GO:0008270]; one-carbon metabolic process [GO:0006730]	one-carbon metabolic process [GO:0006730]	Alpha-carbonic anhydrase family
4jfi	Q13451	0.135747	3.0439	AAAHHHarom	6		FKBP5_HUMAN	Peptidyl-prolyl cis-trans isomerase FKBP5 (PPIase FKBP5) (EC 5.2.1.8) (51 kDa FK506-binding protein) (51 kDa FKBP) (FKBP-51) (54 kDa progesterone receptor-associated immunophilin) (Androgen-regulated protein 6) (FF1 antigen) (FK506-binding protein 5) (FKBP-5) (FKBP54) (p54) (HSP90-binding immunophilin) (Rotamase)	FKBP5 AIG6 FKBP51			cytoplasm [GO:0005737]; cytosol [GO:0005829]; extracellular exosome [GO:0070062]; membrane [GO:0016020]; nucleoplasm [GO:0005654]	FK506 binding [GO:0005528]; heat shock protein binding [GO:0031072]; peptidyl-prolyl cis-trans isomerase activity [GO:0003755]	cytoplasm [GO:0005737]; cytosol [GO:0005829]; extracellular exosome [GO:0070062]; membrane [GO:0016020]; nucleoplasm [GO:0005654]; FK506 binding [GO:0005528]; heat shock protein binding [GO:0031072]; peptidyl-prolyl cis-trans isomerase activity [GO:0003755]; chaperone-mediated protein folding [GO:0061077]; protein folding [GO:0006457]; protein peptidyl-prolyl isomerization [GO:0000413]; response …	chaperone-mediated protein folding [GO:0061077]; protein folding [GO:0006457]; protein peptidyl-prolyl isomerization [GO:0000413]; response to bacterium [GO:0009617]		Q96Q40; P50750; O15111; P00533; P07900; P08238; Q6VAB6; P10636-8; Q9BTE3-2; P00540; Q15831; Q70CQ1; PRO_0000037552 [Q9WMX2]
4lay	Q02790	0.114819	2.9753	AAAHHR	6		FKBP4_HUMAN	Peptidyl-prolyl cis-trans isomerase FKBP4 (PPIase FKBP4) (EC 5.2.1.8) (51 kDa FK506-binding protein) (FKBP51) (52 kDa FK506-binding protein) (52 kDa FKBP) (FKBP-52) (59 kDa immunophilin) (p59) (FK506-binding protein 4) (FKBP-4) (FKBP59) (HSP-binding immunophilin) (HBI) (Immunophilin FKBP52) (Rotamase) [Cleaved into: Peptidyl-prolyl cis-trans isomerase FKBP4, N-terminally processed]	FKBP4 FKBP52			axonal growth cone [GO:0044295]; cytoplasm [GO:0005737]; cytosol [GO:0005829]; extracellular exosome [GO:0070062]; microtubule [GO:0005874]; mitochondrion [GO:0005739]; neuronal cell body [GO:0043025]; nucleoplasm [GO:0005654]; perinuclear region of cytoplasm [GO:0048471]; protein-containing complex [GO:0032991]	ATP binding [GO:0005524]; copper-dependent protein binding [GO:0032767]; FK506 binding [GO:0005528]; GTP binding [GO:0005525]; heat shock protein binding [GO:0031072]; nuclear glucocorticoid receptor binding [GO:0035259]; peptidyl-prolyl cis-trans isomerase activity [GO:0003755]; phosphoprotein binding [GO:0051219]; protein-macromolecule adaptor activity [GO:0030674]; RNA binding [GO:0003723]; ta…	axonal growth cone [GO:0044295]; cytoplasm [GO:0005737]; cytosol [GO:0005829]; extracellular exosome [GO:0070062]; microtubule [GO:0005874]; mitochondrion [GO:0005739]; neuronal cell body [GO:0043025]; nucleoplasm [GO:0005654]; perinuclear region of cytoplasm [GO:0048471]; protein-containing complex [GO:0032991]; ATP binding [GO:0005524]; copper-dependent protein binding [GO:0032767]; FK506 bindi…	androgen receptor signaling pathway [GO:0030521]; chaperone-mediated protein folding [GO:0061077]; copper ion transport [GO:0006825]; embryo implantation [GO:0007566]; male sex differentiation [GO:0046661]; negative regulation of microtubule polymerization [GO:0031115]; negative regulation of microtubule polymerization or depolymerization [GO:0031111]; negative regulation of neuron projection dev…		Q9UKV8; P10275; Q16543; Q92990; P07900; P08238; P04792; P29034; P06703; P35467
3o56	Q07343	0.109799	4.6273	AAHHR	5		PDE4B_HUMAN	cAMP-specific 3',5'-cyclic phosphodiesterase 4B (EC 3.1.4.53) (DPDE4) (PDE32)	PDE4B DPDE4	PATHWAY: Purine metabolism; 3',5'-cyclic AMP degradation; AMP from 3',5'-cyclic AMP: step 1/1. {ECO:0000305|PubMed:15260978, ECO:0000305|PubMed:8392015, ECO:0000305|PubMed:9371714}.		centrosome [GO:0005813]; cytosol [GO:0005829]; dendritic spine [GO:0043197]; excitatory synapse [GO:0060076]; gamma-tubulin complex [GO:0000930]; nucleus [GO:0005634]; perinuclear region of cytoplasm [GO:0048471]; postsynaptic density [GO:0014069]; synaptic vesicle [GO:0008021]; voltage-gated calcium channel complex [GO:0005891]; Z disc [GO:0030018]	3',5'-cyclic-AMP phosphodiesterase activity [GO:0004115]; 3',5'-cyclic-nucleotide phosphodiesterase activity [GO:0004114]; cAMP binding [GO:0030552]; gamma-tubulin binding [GO:0043015]; metal ion binding [GO:0046872]; transmembrane transporter binding [GO:0044325]	centrosome [GO:0005813]; cytosol [GO:0005829]; dendritic spine [GO:0043197]; excitatory synapse [GO:0060076]; gamma-tubulin complex [GO:0000930]; nucleus [GO:0005634]; perinuclear region of cytoplasm [GO:0048471]; postsynaptic density [GO:0014069]; synaptic vesicle [GO:0008021]; voltage-gated calcium channel complex [GO:0005891]; Z disc [GO:0030018]; 3',5'-cyclic-AMP phosphodiesterase activity [G…	cAMP catabolic process [GO:0006198]; cellular response to epinephrine stimulus [GO:0071872]; cellular response to lipopolysaccharide [GO:0071222]; cellular response to xenobiotic stimulus [GO:0071466]; leukocyte migration [GO:0050900]; negative regulation of adenylate cyclase-activating adrenergic receptor signaling pathway involved in heart process [GO:0140199]; negative regulation of relaxation…	Cyclic nucleotide phosphodiesterase family, PDE4 subfamily
1rw8	P36897	0.0942779	3.0439	AAAHHHarom	6		TGFR1_HUMAN	TGF-beta receptor type-1 (TGFR-1) (EC 2.7.11.30) (Activin A receptor type II-like protein kinase of 53kD) (Activin receptor-like kinase 5) (ALK-5) (ALK5) (Serine/threonine-protein kinase receptor R4) (SKR4) (TGF-beta type I receptor) (Transforming growth factor-beta receptor type I) (TGF-beta receptor type I) (TbetaR-I)	TGFBR1 ALK5 SKR4		DISEASE: Loeys-Dietz syndrome 1 (LDS1) [MIM:609192]: An aortic aneurysm syndrome with widespread systemic involvement, characterized by arterial tortuosity and aneurysms, hypertelorism, and bifid uvula or cleft palate. Physical findings include prominent joint laxity, easy bruising, wide and atrophic scars, velvety and translucent skin with easily visible veins, spontaneous rupture of the spleen …	activin receptor complex [GO:0048179]; bicellular tight junction [GO:0005923]; cell surface [GO:0009986]; endosome [GO:0005768]; membrane [GO:0016020]; membrane raft [GO:0045121]; nucleus [GO:0005634]; plasma membrane [GO:0005886]; receptor complex [GO:0043235]; transforming growth factor beta ligand-receptor complex [GO:0070021]	activin binding [GO:0048185]; activin receptor activity, type I [GO:0016361]; ATP binding [GO:0005524]; I-SMAD binding [GO:0070411]; metal ion binding [GO:0046872]; protein kinase activity [GO:0004672]; protein serine/threonine kinase activity [GO:0004674]; SMAD binding [GO:0046332]; transforming growth factor beta binding [GO:0050431]; transforming growth factor beta receptor activity [GO:000502…	activin receptor complex [GO:0048179]; bicellular tight junction [GO:0005923]; cell surface [GO:0009986]; endosome [GO:0005768]; membrane [GO:0016020]; membrane raft [GO:0045121]; nucleus [GO:0005634]; plasma membrane [GO:0005886]; receptor complex [GO:0043235]; transforming growth factor beta ligand-receptor complex [GO:0070021]; activin binding [GO:0048185]; activin receptor activity, type I [G…	activin receptor signaling pathway [GO:0032924]; angiogenesis involved in coronary vascular morphogenesis [GO:0060978]; anterior/posterior pattern specification [GO:0009952]; apoptotic process [GO:0006915]; artery morphogenesis [GO:0048844]; blastocyst development [GO:0001824]; cardiac epithelial to mesenchymal transition [GO:0060317]; cell motility [GO:0048870]; cellular response to growth facto…	Protein kinase superfamily, TKL Ser/Thr protein kinase family, TGFB receptor subfamily	P62942; P01137; P63104; PRO_0000045599 [Q99IB8]; P02750
1re0	P84077	0.0843964	4.6959	AAHHH	5	0.504115	ARF1_HUMAN	ADP-ribosylation factor 1 (EC 3.6.5.2)	ARF1		DISEASE: Periventricular nodular heterotopia 8 (PVNH8) [MIM:618185]: A form of periventricular nodular heterotopia, a disorder resulting from a defect in the pattern of neuronal migration in which ectopic collections of neurons lie along the lateral ventricles of the brain or just beneath, contiguously or in isolated patches. PVNH8 is an autosomal dominant disease characterized by developmental d…	cell leading edge [GO:0031252]; cytoplasm [GO:0005737]; cytosol [GO:0005829]; extracellular exosome [GO:0070062]; focal adhesion [GO:0005925]; Golgi membrane [GO:0000139]; neuron projection [GO:0043005]; plasma membrane [GO:0005886]; postsynaptic density [GO:0014069]; protein-containing complex [GO:0032991]; sarcomere [GO:0030017]	GTP binding [GO:0005525]; GTPase activity [GO:0003924]; magnesium ion binding [GO:0000287]; protein domain specific binding [GO:0019904]; RNA binding [GO:0003723]	cell leading edge [GO:0031252]; cytoplasm [GO:0005737]; cytosol [GO:0005829]; extracellular exosome [GO:0070062]; focal adhesion [GO:0005925]; Golgi membrane [GO:0000139]; neuron projection [GO:0043005]; plasma membrane [GO:0005886]; postsynaptic density [GO:0014069]; protein-containing complex [GO:0032991]; sarcomere [GO:0030017]; GTP binding [GO:0005525]; GTPase activity [GO:0003924]; magnesium…	cellular copper ion homeostasis [GO:0006878]; cellular response to virus [GO:0098586]; dendritic spine organization [GO:0097061]; intracellular protein transport [GO:0006886]; long-term synaptic depression [GO:0060292]; mitotic cleavage furrow ingression [GO:1990386]; regulation of Arp2/3 complex-mediated actin nucleation [GO:0034315]; regulation of receptor internalization [GO:0002090]; vesicle-…	Small GTPase superfamily, Arf family	P53367; Q99418; O60271
2q8i	P10515	0.0831673	3.7823	ADHHHarom	5		ODP2_HUMAN	Dihydrolipoyllysine-residue acetyltransferase component of pyruvate dehydrogenase complex, mitochondrial (EC 2.3.1.12) (70 kDa mitochondrial autoantigen of primary biliary cirrhosis) (PBC) (Dihydrolipoamide acetyltransferase component of pyruvate dehydrogenase complex) (M2 antigen complex 70 kDa subunit) (Pyruvate dehydrogenase complex component E2) (PDC-E2) (PDCE2)	DLAT DLTA		DISEASE: Note=Primary biliary cirrhosis is a chronic, progressive cholestatic liver disease characterized by the presence of antimitochondrial autoantibodies in patients' serum. It manifests with inflammatory obliteration of intra-hepatic bile duct, leading to liver cell damage and cirrhosis. Patients with primary biliary cirrhosis show autoantibodies against the E2 component of pyruvate dehydrog…	intracellular membrane-bounded organelle [GO:0043231]; mitochondrial matrix [GO:0005759]; mitochondrial pyruvate dehydrogenase complex [GO:0005967]; mitochondrion [GO:0005739]; pyruvate dehydrogenase complex [GO:0045254]	dihydrolipoyllysine-residue acetyltransferase activity [GO:0004742]; identical protein binding [GO:0042802]	intracellular membrane-bounded organelle [GO:0043231]; mitochondrial matrix [GO:0005759]; mitochondrial pyruvate dehydrogenase complex [GO:0005967]; mitochondrion [GO:0005739]; pyruvate dehydrogenase complex [GO:0045254]; dihydrolipoyllysine-residue acetyltransferase activity [GO:0004742]; identical protein binding [GO:0042802]; acetyl-CoA biosynthetic process from pyruvate [GO:0006086]; glucose …	acetyl-CoA biosynthetic process from pyruvate [GO:0006086]; glucose metabolic process [GO:0006006]; tricarboxylic acid cycle [GO:0006099]	2-oxoacid dehydrogenase family	P10515; P11177; Q15120; Q9Y6E7
2q8i	Q15120	0.0831673	3.7823	ADHHHarom	5		PDK3_HUMAN	[Pyruvate dehydrogenase (acetyl-transferring)] kinase isozyme 3, mitochondrial (EC 2.7.11.2) (Pyruvate dehydrogenase kinase isoform 3)	PDK3 PDHK3		DISEASE: Charcot-Marie-Tooth disease, X-linked dominant, 6 (CMTX6) [MIM:300905]: A form of Charcot-Marie-Tooth disease, a disorder of the peripheral nervous system, characterized by progressive weakness and atrophy, initially of the peroneal muscles and later of the distal muscles of the arms. Charcot-Marie-Tooth disease is classified in two main groups on the basis of electrophysiologic properti…	mitochondrial matrix [GO:0005759]; mitochondrion [GO:0005739]; nucleolus [GO:0005730]	ATP binding [GO:0005524]; protein kinase activity [GO:0004672]; protein serine/threonine kinase activity [GO:0004674]; pyruvate dehydrogenase (acetyl-transferring) kinase activity [GO:0004740]	mitochondrial matrix [GO:0005759]; mitochondrion [GO:0005739]; nucleolus [GO:0005730]; ATP binding [GO:0005524]; protein kinase activity [GO:0004672]; protein serine/threonine kinase activity [GO:0004674]; pyruvate dehydrogenase (acetyl-transferring) kinase activity [GO:0004740]; cellular response to fatty acid [GO:0071398]; cellular response to glucose stimulus [GO:0071333]; glucose metabolic pr…	cellular response to fatty acid [GO:0071398]; cellular response to glucose stimulus [GO:0071333]; glucose metabolic process [GO:0006006]; hypoxia-inducible factor-1alpha signaling pathway [GO:0097411]; peptidyl-serine phosphorylation [GO:0018105]; peroxisome proliferator activated receptor signaling pathway [GO:0035357]; protein phosphorylation [GO:0006468]; regulation of acetyl-CoA biosynthetic …	PDK/BCKDK protein kinase family	P10515
4c2p	P12821	0.0747369	5.2971	AADH	4		ACE_HUMAN	Angiotensin-converting enzyme (ACE) (EC 3.4.15.1) (Dipeptidyl carboxypeptidase I) (Kininase II) (CD antigen CD143) [Cleaved into: Angiotensin-converting enzyme, soluble form]	ACE DCP DCP1		DISEASE: Ischemic stroke (ISCHSTR) [MIM:601367]: A stroke is an acute neurologic event leading to death of neural tissue of the brain and resulting in loss of motor, sensory and/or cognitive function. Ischemic strokes, resulting from vascular occlusion, is considered to be a highly complex disease consisting of a group of heterogeneous disorders with multiple genetic and environmental risk factor…	basal plasma membrane [GO:0009925]; brush border membrane [GO:0031526]; endosome [GO:0005768]; external side of plasma membrane [GO:0009897]; extracellular exosome [GO:0070062]; extracellular region [GO:0005576]; extracellular space [GO:0005615]; lysosome [GO:0005764]; plasma membrane [GO:0005886]; sperm midpiece [GO:0097225]	actin binding [GO:0003779]; bradykinin receptor binding [GO:0031711]; calmodulin binding [GO:0005516]; carboxypeptidase activity [GO:0004180]; chloride ion binding [GO:0031404]; endopeptidase activity [GO:0004175]; exopeptidase activity [GO:0008238]; heterocyclic compound binding [GO:1901363]; metallodipeptidase activity [GO:0070573]; metalloendopeptidase activity [GO:0004222]; metallopeptidase a…	basal plasma membrane [GO:0009925]; brush border membrane [GO:0031526]; endosome [GO:0005768]; external side of plasma membrane [GO:0009897]; extracellular exosome [GO:0070062]; extracellular region [GO:0005576]; extracellular space [GO:0005615]; lysosome [GO:0005764]; plasma membrane [GO:0005886]; sperm midpiece [GO:0097225]; actin binding [GO:0003779]; bradykinin receptor binding [GO:0031711]; …	aging [GO:0007568]; amyloid-beta metabolic process [GO:0050435]; angiogenesis involved in coronary vascular morphogenesis [GO:0060978]; angiotensin maturation [GO:0002003]; animal organ regeneration [GO:0031100]; antigen processing and presentation of peptide antigen via MHC class I [GO:0002474]; arachidonic acid secretion [GO:0050482]; blood vessel diameter maintenance [GO:0097746]; blood vessel…	Peptidase M2 family	P05556
1n4p	P61225	0.0742661	6.2792	AAHH	4		RAP2B_HUMAN	Ras-related protein Rap-2b (EC 3.6.5.2)	RAP2B			bicellular tight junction [GO:0005923]; cell-cell contact zone [GO:0044291]; cytosol [GO:0005829]; extracellular exosome [GO:0070062]; membrane [GO:0016020]; membrane raft [GO:0045121]; plasma membrane [GO:0005886]; recycling endosome membrane [GO:0055038]; specific granule membrane [GO:0035579]; tertiary granule membrane [GO:0070821]	G protein activity [GO:0003925]; GDP binding [GO:0019003]; GTP binding [GO:0005525]; GTPase activity [GO:0003924]; protein domain specific binding [GO:0019904]	bicellular tight junction [GO:0005923]; cell-cell contact zone [GO:0044291]; cytosol [GO:0005829]; extracellular exosome [GO:0070062]; membrane [GO:0016020]; membrane raft [GO:0045121]; plasma membrane [GO:0005886]; recycling endosome membrane [GO:0055038]; specific granule membrane [GO:0035579]; tertiary granule membrane [GO:0070821]; G protein activity [GO:0003925]; GDP binding [GO:0019003]; GT…	negative regulation of cell migration [GO:0030336]; platelet activation [GO:0030168]; platelet aggregation [GO:0070527]; positive regulation of protein autophosphorylation [GO:0031954]; Rap protein signal transduction [GO:0032486]; regulation of protein tyrosine kinase activity [GO:0061097]; signal transduction [GO:0007165]	Small GTPase superfamily, Ras family	Q13554; Q13554-3; P52306-5; Q8WWW0; Q59EK9; Q59EK9-3
3nup	Q00534	0.0675752	3.7137	AADHH	5		CDK6_HUMAN	Cyclin-dependent kinase 6 (EC 2.7.11.22) (Cell division protein kinase 6) (Serine/threonine-protein kinase PLSTIRE)	CDK6 CDKN6		DISEASE: Microcephaly 12, primary, autosomal recessive (MCPH12) [MIM:616080]: A form of microcephaly, a disease defined as a head circumference more than 3 standard deviations below the age-related mean. Brain weight is markedly reduced and the cerebral cortex is disproportionately small. {ECO:0000269|PubMed:23918663}. Note=The disease is caused by variants affecting the gene represented in this …	centrosome [GO:0005813]; cyclin D2-CDK6 complex [GO:0097132]; cyclin-dependent protein kinase holoenzyme complex [GO:0000307]; cytoplasm [GO:0005737]; cytosol [GO:0005829]; mediator complex [GO:0016592]; nucleoplasm [GO:0005654]; nucleus [GO:0005634]; ruffle [GO:0001726]	ATP binding [GO:0005524]; cyclin binding [GO:0030332]; cyclin-dependent protein serine/threonine kinase activity [GO:0004693]; FBXO family protein binding [GO:0098770]; protein serine kinase activity [GO:0106310]	centrosome [GO:0005813]; cyclin D2-CDK6 complex [GO:0097132]; cyclin-dependent protein kinase holoenzyme complex [GO:0000307]; cytoplasm [GO:0005737]; cytosol [GO:0005829]; mediator complex [GO:0016592]; nucleoplasm [GO:0005654]; nucleus [GO:0005634]; ruffle [GO:0001726]; ATP binding [GO:0005524]; cyclin binding [GO:0030332]; cyclin-dependent protein serine/threonine kinase activity [GO:0004693];…	astrocyte development [GO:0014002]; cell dedifferentiation [GO:0043697]; cell division [GO:0051301]; dentate gyrus development [GO:0021542]; G1/S transition of mitotic cell cycle [GO:0000082]; generation of neurons [GO:0048699]; gliogenesis [GO:0042063]; hematopoietic stem cell differentiation [GO:0060218]; lateral ventricle development [GO:0021670]; negative regulation of cell cycle [GO:0045786]…	Protein kinase superfamily, CMGC Ser/Thr protein kinase family, CDC2/CDKX subfamily	P41238; P24385; P30281; P51946; Q14094; Q16543; P38936; P42771; P42772; P42773; P55273; Q08050-1; P08238; Q5XKR4; Q01196; Q9C019
3dej	P42574	0.0629069	5.2971	ADHaromR	4		CASP3_HUMAN	Caspase-3 (CASP-3) (EC 3.4.22.56) (Apopain) (Cysteine protease CPP32) (CPP-32) (Protein Yama) (SREBP cleavage activity 1) (SCA-1) [Cleaved into: Caspase-3 subunit p17; Caspase-3 subunit p12]	CASP3 CPP32			caspase complex [GO:0008303]; cytoplasm [GO:0005737]; cytosol [GO:0005829]; death-inducing signaling complex [GO:0031264]; membrane raft [GO:0045121]; neuronal cell body [GO:0043025]; nucleoplasm [GO:0005654]; nucleus [GO:0005634]	aspartic-type endopeptidase activity [GO:0004190]; cyclin-dependent protein serine/threonine kinase inhibitor activity [GO:0004861]; cysteine-type endopeptidase activity [GO:0004197]; cysteine-type endopeptidase activity involved in apoptotic process [GO:0097153]; cysteine-type endopeptidase activity involved in apoptotic signaling pathway [GO:0097199]; cysteine-type endopeptidase activity involv…	caspase complex [GO:0008303]; cytoplasm [GO:0005737]; cytosol [GO:0005829]; death-inducing signaling complex [GO:0031264]; membrane raft [GO:0045121]; neuronal cell body [GO:0043025]; nucleoplasm [GO:0005654]; nucleus [GO:0005634]; aspartic-type endopeptidase activity [GO:0004190]; cyclin-dependent protein serine/threonine kinase inhibitor activity [GO:0004861]; cysteine-type endopeptidase activi…	anterior neural tube closure [GO:0061713]; apoptotic process [GO:0006915]; apoptotic signaling pathway [GO:0097190]; axonal fasciculation [GO:0007413]; B cell homeostasis [GO:0001782]; cell fate commitment [GO:0045165]; cellular response to DNA damage stimulus [GO:0006974]; cellular response to staurosporine [GO:0072734]; epithelial cell apoptotic process [GO:1904019]; erythrocyte differentiation…	Peptidase C14A family	O43823; Q9Y243; P05067; P54252; P55212; P55211; Q14203-5; P42858; Q00987; O60551; P09874; Q5JUK2; P10599; Q9BYP7; P98170
3vey	P35557	0.0604936	3.6451	AADHR	5		HXK4_HUMAN	Hexokinase-4 (HK4) (EC 2.7.1.1) (Glucokinase) (Hexokinase type IV) (HK IV) (Hexokinase-D)	GCK	PATHWAY: Carbohydrate metabolism; hexose metabolism. {ECO:0000305|PubMed:7742312}.; PATHWAY: Carbohydrate degradation; glycolysis; D-glyceraldehyde 3-phosphate and glycerone phosphate from D-glucose: step 1/4. {ECO:0000305|PubMed:7742312}.	DISEASE: Maturity-onset diabetes of the young 2 (MODY2) [MIM:125851]: A form of diabetes that is characterized by an autosomal dominant mode of inheritance, onset in childhood or early adulthood (usually before 25 years of age), a primary defect in insulin secretion and frequent insulin-independence at the beginning of the disease. {ECO:0000269|PubMed:10588527, ECO:0000269|PubMed:10694920, ECO:00…	cytosol [GO:0005829]; mitochondrion [GO:0005739]; nucleoplasm [GO:0005654]	ATP binding [GO:0005524]; fructokinase activity [GO:0008865]; glucokinase activity [GO:0004340]; glucose binding [GO:0005536]; mannokinase activity [GO:0019158]	cytosol [GO:0005829]; mitochondrion [GO:0005739]; nucleoplasm [GO:0005654]; ATP binding [GO:0005524]; fructokinase activity [GO:0008865]; glucokinase activity [GO:0004340]; glucose binding [GO:0005536]; mannokinase activity [GO:0019158]; calcium ion import [GO:0070509]; canonical glycolysis [GO:0061621]; carbohydrate phosphorylation [GO:0046835]; cellular glucose homeostasis [GO:0001678]; cellula…	calcium ion import [GO:0070509]; canonical glycolysis [GO:0061621]; carbohydrate phosphorylation [GO:0046835]; cellular glucose homeostasis [GO:0001678]; cellular response to insulin stimulus [GO:0032869]; cellular response to leptin stimulus [GO:0044320]; detection of glucose [GO:0051594]; glucose 6-phosphate metabolic process [GO:0051156]; glucose homeostasis [GO:0042593]; glucose metabolic pro…	Hexokinase family	Q14397; P16118; A6NLX3
3cav	P51857	0.0470367	6.3478	AHHH	4		AK1D1_HUMAN	Aldo-keto reductase family 1 member D1 (EC 1.3.1.3) (3-oxo-5-beta-steroid 4-dehydrogenase) (Delta(4)-3-ketosteroid 5-beta-reductase) (Delta(4)-3-oxosteroid 5-beta-reductase)	AKR1D1 SRD5B1		DISEASE: Congenital bile acid synthesis defect 2 (CBAS2) [MIM:235555]: A condition characterized by jaundice, intrahepatic cholestasis and hepatic failure. Patients with this liver disease show absence or low levels of chenodeoxycholic acid and cholic acid in plasma and urine. {ECO:0000269|PubMed:12970144, ECO:0000269|PubMed:15030995, ECO:0000269|PubMed:19175828, ECO:0000269|PubMed:20522910}. Not…	cytosol [GO:0005829]	alditol:NADP+ 1-oxidoreductase activity [GO:0004032]; aldo-keto reductase (NADP) activity [GO:0004033]; delta4-3-oxosteroid 5beta-reductase activity [GO:0047787]; ketosteroid monooxygenase activity [GO:0047086]; steroid binding [GO:0005496]; steroid dehydrogenase activity [GO:0016229]	cytosol [GO:0005829]; alditol:NADP+ 1-oxidoreductase activity [GO:0004032]; aldo-keto reductase (NADP) activity [GO:0004033]; delta4-3-oxosteroid 5beta-reductase activity [GO:0047787]; ketosteroid monooxygenase activity [GO:0047086]; steroid binding [GO:0005496]; steroid dehydrogenase activity [GO:0016229]; androgen metabolic process [GO:0008209]; bile acid biosynthetic process [GO:0006699]; bile…	androgen metabolic process [GO:0008209]; bile acid biosynthetic process [GO:0006699]; bile acid catabolic process [GO:0030573]; C21-steroid hormone metabolic process [GO:0008207]; cholesterol catabolic process [GO:0006707]; digestion [GO:0007586]; steroid metabolic process [GO:0008202]	Aldo/keto reductase family
2g72	P11086	0.040598	5.3657	DHHR	4		PNMT_HUMAN	Phenylethanolamine N-methyltransferase (PNMTase) (EC 2.1.1.28) (Noradrenaline N-methyltransferase)	PNMT PENT	PATHWAY: Catecholamine biosynthesis; (R)-adrenaline biosynthesis; (R)-adrenaline from (R)-noradrenaline: step 1/1. {ECO:0000269|PubMed:20496117}.		cytosol [GO:0005829]	N-methyltransferase activity [GO:0008170]; phenylethanolamine N-methyltransferase activity [GO:0004603]	cytosol [GO:0005829]; N-methyltransferase activity [GO:0008170]; phenylethanolamine N-methyltransferase activity [GO:0004603]; catecholamine biosynthetic process [GO:0042423]; epinephrine biosynthetic process [GO:0042418]; methylation [GO:0032259]	catecholamine biosynthetic process [GO:0042423]; epinephrine biosynthetic process [GO:0042418]; methylation [GO:0032259]	Class I-like SAM-binding methyltransferase superfamily, NNMT/PNMT/TEMT family	Q9P2G9-2; Q8TBB1
4p0a	Q96EP0	0.0391501	4.5587	AAAHR	5		RNF31_HUMAN	E3 ubiquitin-protein ligase RNF31 (EC 2.3.2.31) (HOIL-1-interacting protein) (HOIP) (RING finger protein 31) (RING-type E3 ubiquitin transferase RNF31) (Zinc in-between-RING-finger ubiquitin-associated domain protein)	RNF31 ZIBRA	PATHWAY: Protein modification; protein ubiquitination. {ECO:0000269|PubMed:17006537, ECO:0000269|PubMed:19136968, ECO:0000269|PubMed:20005846, ECO:0000269|PubMed:28481331}.		CD40 receptor complex [GO:0035631]; cytoplasmic side of plasma membrane [GO:0009898]; cytosol [GO:0005829]; LUBAC complex [GO:0071797]	identical protein binding [GO:0042802]; K48-linked polyubiquitin modification-dependent protein binding [GO:0036435]; K63-linked polyubiquitin modification-dependent protein binding [GO:0070530]; linear polyubiquitin binding [GO:1990450]; metal ion binding [GO:0046872]; ubiquitin binding [GO:0043130]; ubiquitin protein ligase activity [GO:0061630]; ubiquitin protein ligase binding [GO:0031625]; u…	CD40 receptor complex [GO:0035631]; cytoplasmic side of plasma membrane [GO:0009898]; cytosol [GO:0005829]; LUBAC complex [GO:0071797]; identical protein binding [GO:0042802]; K48-linked polyubiquitin modification-dependent protein binding [GO:0036435]; K63-linked polyubiquitin modification-dependent protein binding [GO:0070530]; linear polyubiquitin binding [GO:1990450]; metal ion binding [GO:00…	CD40 signaling pathway [GO:0023035]; defense response to bacterium [GO:0042742]; negative regulation of necroptotic process [GO:0060546]; positive regulation of I-kappaB kinase/NF-kappaB signaling [GO:0043123]; positive regulation of NF-kappaB transcription factor activity [GO:0051092]; positive regulation of protein targeting to mitochondrion [GO:1903955]; positive regulation of xenophagy [GO:19…	RBR family	P54253; P54252; O14645; Q9UMF0; Q9Y6K9; O14901; Q9BVL2; Q9BYM8; Q96EP0; Q9H0F6; P84022; P62837; Q9QYP6; Q4VA12; Q8N4L8; Q9BYQ4; Q5TAL4; Q08117; Q9Y5U2; Q6EMK4
4p0a	P55072	0.0391501	4.5587	AAAHR	5		TERA_HUMAN	Transitional endoplasmic reticulum ATPase (TER ATPase) (EC 3.6.4.6) (15S Mg(2+)-ATPase p97 subunit) (Valosin-containing protein) (VCP)	VCP		DISEASE: Inclusion body myopathy with early-onset Paget disease with or without frontotemporal dementia 1 (IBMPFD1) [MIM:167320]: An autosomal dominant disease characterized by disabling muscle weakness clinically resembling to limb girdle muscular dystrophy, osteolytic bone lesions consistent with Paget disease, and premature frontotemporal dementia. Clinical features show incomplete penetrance.…	ATPase complex [GO:1904949]; azurophil granule lumen [GO:0035578]; cytoplasm [GO:0005737]; cytoplasmic stress granule [GO:0010494]; cytosol [GO:0005829]; Derlin-1 retrotranslocation complex [GO:0036513]; endoplasmic reticulum [GO:0005783]; endoplasmic reticulum membrane [GO:0005789]; extracellular exosome [GO:0070062]; extracellular region [GO:0005576]; ficolin-1-rich granule lumen [GO:1904813]; …	ADP binding [GO:0043531]; ATP binding [GO:0005524]; ATP hydrolysis activity [GO:0016887]; BAT3 complex binding [GO:1904288]; deubiquitinase activator activity [GO:0035800]; identical protein binding [GO:0042802]; K48-linked polyubiquitin modification-dependent protein binding [GO:0036435]; lipid binding [GO:0008289]; MHC class I protein binding [GO:0042288]; polyubiquitin modification-dependent p…	ATPase complex [GO:1904949]; azurophil granule lumen [GO:0035578]; cytoplasm [GO:0005737]; cytoplasmic stress granule [GO:0010494]; cytosol [GO:0005829]; Derlin-1 retrotranslocation complex [GO:0036513]; endoplasmic reticulum [GO:0005783]; endoplasmic reticulum membrane [GO:0005789]; extracellular exosome [GO:0070062]; extracellular region [GO:0005576]; ficolin-1-rich granule lumen [GO:1904813]; …	activation of cysteine-type endopeptidase activity involved in apoptotic process [GO:0006919]; aggresome assembly [GO:0070842]; ATP metabolic process [GO:0046034]; autophagosome maturation [GO:0097352]; autophagy [GO:0006914]; cellular response to arsenite ion [GO:1903843]; cellular response to DNA damage stimulus [GO:0006974]; cellular response to heat [GO:0034605]; DNA repair [GO:0006281]; doub…	AAA ATPase family	Q9UKV5; Q9BZE9; P54253; P54252; P54252-1; Q96LK0; O96017; O75175; Q13619; O60941-5; P26378-2; Q96J88-3; Q9UNN5-1; Q96CS3; Q969W3; O94868; P09471; P62993; P42858; Q8TBB1; Q8WZA0; Q9H7H0-2; Q8TAT6; Q9UNZ2; Q96HA8; Q9Y263; Q07869; P62136; P07602-1; P25786; P62191; P26045; Q9Y4L5; P32969; Q9H0K1; Q8NBI5; Q16560-2; P46977; P51668; B1AQ61; O94941; Q96LJ8; Q5T124-6; P68543; Q14CS0; Q92575; Q9BZV1; O9488…
4bdi	O96017	0.0342388	5.3657	ADHH	4		CHK2_HUMAN	Serine/threonine-protein kinase Chk2 (EC 2.7.11.1) (CHK2 checkpoint homolog) (Cds1 homolog) (Hucds1) (hCds1) (Checkpoint kinase 2)	CHEK2 CDS1 CHK2 RAD53		DISEASE: Li-Fraumeni syndrome 2 (LFS2) [MIM:609265]: A highly penetrant familial cancer syndrome that in its classic form is defined by the existence of a proband affected by a sarcoma before 45 years with a first degree relative affected by any tumor before 45 years and another first degree relative with any tumor before 45 years or a sarcoma at any age. Other clinical definitions for LFS have b…	cytoplasm [GO:0005737]; Golgi apparatus [GO:0005794]; nucleoplasm [GO:0005654]; nucleus [GO:0005634]; PML body [GO:0016605]	ATP binding [GO:0005524]; identical protein binding [GO:0042802]; metal ion binding [GO:0046872]; protein homodimerization activity [GO:0042803]; protein kinase binding [GO:0019901]; protein serine kinase activity [GO:0106310]; protein serine/threonine kinase activity [GO:0004674]; ubiquitin protein ligase binding [GO:0031625]	cytoplasm [GO:0005737]; Golgi apparatus [GO:0005794]; nucleoplasm [GO:0005654]; nucleus [GO:0005634]; PML body [GO:0016605]; ATP binding [GO:0005524]; identical protein binding [GO:0042802]; metal ion binding [GO:0046872]; protein homodimerization activity [GO:0042803]; protein kinase binding [GO:0019901]; protein serine kinase activity [GO:0106310]; protein serine/threonine kinase activity [GO:0…	cell division [GO:0051301]; cellular response to bisphenol A [GO:1903926]; cellular response to DNA damage stimulus [GO:0006974]; cellular response to gamma radiation [GO:0071480]; cellular response to xenobiotic stimulus [GO:0071466]; DNA damage checkpoint signaling [GO:0000077]; DNA damage response, signal transduction by p53 class mediator resulting in cell cycle arrest [GO:0006977]; DNA damag…	Protein kinase superfamily, CAMK Ser/Thr protein kinase family, CHK2 subfamily	Q9NY61; Q9UQ88-1; O96017; Q9Y248; Q13007; Q96KN1; P56645; P53350; O15355; Q15172; Q15173; Q13362-1; Q13362-2; Q13362-3; Q16537; P06400; Q5VTR2; P55072; P18887; PRO_0000037319 [P0C6X7]; P06725; PRO_0000037577 [P27958]
2wd9	Q08AH3	0.0326513	6.3478	AHHHarom	4		ACS2A_HUMAN	Acyl-coenzyme A synthetase ACSM2A, mitochondrial (EC 6.2.1.2) (Acyl-CoA synthetase medium-chain family member 2A) (Benzoate--CoA ligase) (EC 6.2.1.25) (Butyrate--CoA ligase 2A) (Butyryl-coenzyme A synthetase 2A) (Middle-chain acyl-CoA synthetase 2A)	ACSM2A ACSM2 MACS2			mitochondrial matrix [GO:0005759]; mitochondrion [GO:0005739]	ATP binding [GO:0005524]; benzoate-CoA ligase activity [GO:0018858]; butyrate-CoA ligase activity [GO:0047760]; decanoate-CoA ligase activity [GO:0102391]; fatty acid ligase activity [GO:0015645]; fatty-acyl-CoA synthase activity [GO:0004321]; metal ion binding [GO:0046872]	mitochondrial matrix [GO:0005759]; mitochondrion [GO:0005739]; ATP binding [GO:0005524]; benzoate-CoA ligase activity [GO:0018858]; butyrate-CoA ligase activity [GO:0047760]; decanoate-CoA ligase activity [GO:0102391]; fatty acid ligase activity [GO:0015645]; fatty-acyl-CoA synthase activity [GO:0004321]; metal ion binding [GO:0046872]; acyl-CoA metabolic process [GO:0006637]; fatty acid biosynth…	acyl-CoA metabolic process [GO:0006637]; fatty acid biosynthetic process [GO:0006633]; glucose homeostasis [GO:0042593]; medium-chain fatty-acyl-CoA metabolic process [GO:0036112]; triglyceride homeostasis [GO:0070328]	ATP-dependent AMP-binding enzyme family
3n0n	P00918	0.0267658	6.2792	AAHaromHarom	4		CAH2_HUMAN	Carbonic anhydrase 2 (EC 4.2.1.1) (Carbonate dehydratase II) (Carbonic anhydrase C) (CAC) (Carbonic anhydrase II) (CA-II) (Cyanamide hydratase CA2) (EC 4.2.1.69)	CA2		DISEASE: Osteopetrosis, autosomal recessive 3 (OPTB3) [MIM:259730]: A rare genetic disease characterized by abnormally dense bone, due to defective resorption of immature bone. Osteopetrosis occurs in two forms: a severe autosomal recessive form occurring in utero, infancy, or childhood, and a benign autosomal dominant form occurring in adolescence or adulthood. Recessive osteopetrosis commonly m…	apical part of cell [GO:0045177]; cytoplasm [GO:0005737]; cytosol [GO:0005829]; extracellular exosome [GO:0070062]; myelin sheath [GO:0043209]; plasma membrane [GO:0005886]	arylesterase activity [GO:0004064]; carbonate dehydratase activity [GO:0004089]; cyanamide hydratase activity [GO:0018820]; hydro-lyase activity [GO:0016836]; zinc ion binding [GO:0008270]	apical part of cell [GO:0045177]; cytoplasm [GO:0005737]; cytosol [GO:0005829]; extracellular exosome [GO:0070062]; myelin sheath [GO:0043209]; plasma membrane [GO:0005886]; arylesterase activity [GO:0004064]; carbonate dehydratase activity [GO:0004089]; cyanamide hydratase activity [GO:0018820]; hydro-lyase activity [GO:0016836]; zinc ion binding [GO:0008270]; angiotensin-activated signaling pat…	angiotensin-activated signaling pathway [GO:0038166]; carbon dioxide transport [GO:0015670]; morphogenesis of an epithelium [GO:0002009]; neuron cellular homeostasis [GO:0070050]; one-carbon metabolic process [GO:0006730]; positive regulation of cellular pH reduction [GO:0032849]; positive regulation of dipeptide transmembrane transport [GO:2001150]; positive regulation of synaptic transmission, …	Alpha-carbonic anhydrase family
2itx	P00533	0.0260273	5.2971	AADHarom	4		EGFR_HUMAN	Epidermal growth factor receptor (EC 2.7.10.1) (Proto-oncogene c-ErbB-1) (Receptor tyrosine-protein kinase erbB-1)	EGFR ERBB ERBB1 HER1		DISEASE: Lung cancer (LNCR) [MIM:211980]: A common malignancy affecting tissues of the lung. The most common form of lung cancer is non-small cell lung cancer (NSCLC) that can be divided into 3 major histologic subtypes: squamous cell carcinoma, adenocarcinoma, and large cell lung cancer. NSCLC is often diagnosed at an advanced stage and has a poor prognosis. {ECO:0000269|PubMed:15118125, ECO:000…	basal plasma membrane [GO:0009925]; basolateral plasma membrane [GO:0016323]; cell junction [GO:0030054]; cell surface [GO:0009986]; clathrin-coated endocytic vesicle membrane [GO:0030669]; cytoplasm [GO:0005737]; early endosome membrane [GO:0031901]; endoplasmic reticulum membrane [GO:0005789]; endosome [GO:0005768]; endosome membrane [GO:0010008]; extracellular space [GO:0005615]; focal adhesio…	actin filament binding [GO:0051015]; ATP binding [GO:0005524]; ATPase binding [GO:0051117]; cadherin binding [GO:0045296]; chromatin binding [GO:0003682]; double-stranded DNA binding [GO:0003690]; enzyme binding [GO:0019899]; epidermal growth factor binding [GO:0048408]; epidermal growth factor receptor activity [GO:0005006]; identical protein binding [GO:0042802]; kinase binding [GO:0019900]; MA…	basal plasma membrane [GO:0009925]; basolateral plasma membrane [GO:0016323]; cell junction [GO:0030054]; cell surface [GO:0009986]; clathrin-coated endocytic vesicle membrane [GO:0030669]; cytoplasm [GO:0005737]; early endosome membrane [GO:0031901]; endoplasmic reticulum membrane [GO:0005789]; endosome [GO:0005768]; endosome membrane [GO:0010008]; extracellular space [GO:0005615]; focal adhesio…	activation of phospholipase C activity [GO:0007202]; cell morphogenesis [GO:0000902]; cell surface receptor signaling pathway [GO:0007166]; cell-cell adhesion [GO:0098609]; cellular response to amino acid stimulus [GO:0071230]; cellular response to cadmium ion [GO:0071276]; cellular response to epidermal growth factor stimulus [GO:0071364]; cellular response to estradiol stimulus [GO:0071392]; ce…	Protein kinase superfamily, Tyr protein kinase family, EGF receptor subfamily	P00519; P42684; Q15109; Q9UKV8; Q09666; O00170; Q02952; Q92625; P04083; P07355; Q10567; Q96CW1; O00213; Q92870; O95704; Q9UKG1; O14965; P30530; Q9UQB8; Q9BXH1; Q14457; P51451; P62158; P49069; Q03135; P51636; P22681; Q16543; P12830; P06493; P23528; Q9BZP6; Q9NSE2; Q7Z7G1; P46108; P46108-1; P46109; O60716; Q14247; Q6PKX4; P01133; P00533; Q6UW88; Q12929; P04626; P21860; Q15303; P07992; O14944; Q9UJM…
4f9y	Q16539	0.0218082	5.3657	ADHaromHarom	4		MK14_HUMAN	Mitogen-activated protein kinase 14 (MAP kinase 14) (MAPK 14) (EC 2.7.11.24) (Cytokine suppressive anti-inflammatory drug-binding protein) (CSAID-binding protein) (CSBP) (MAP kinase MXI2) (MAX-interacting protein 2) (Mitogen-activated protein kinase p38 alpha) (MAP kinase p38 alpha) (Stress-activated protein kinase 2a) (SAPK2a)	MAPK14 CSBP CSBP1 CSBP2 CSPB1 MXI2 SAPK2A			cytoplasm [GO:0005737]; cytosol [GO:0005829]; extracellular region [GO:0005576]; ficolin-1-rich granule lumen [GO:1904813]; glutamatergic synapse [GO:0098978]; mitochondrion [GO:0005739]; nuclear speck [GO:0016607]; nucleoplasm [GO:0005654]; nucleus [GO:0005634]; secretory granule lumen [GO:0034774]; spindle pole [GO:0000922]	ATP binding [GO:0005524]; enzyme binding [GO:0019899]; MAP kinase activity [GO:0004707]; MAP kinase kinase activity [GO:0004708]; mitogen-activated protein kinase p38 binding [GO:0048273]; NFAT protein binding [GO:0051525]; phosphatase activator activity [GO:0019211]; protein phosphatase binding [GO:0019903]; protein serine kinase activity [GO:0106310]; protein serine/threonine kinase activity [G…	cytoplasm [GO:0005737]; cytosol [GO:0005829]; extracellular region [GO:0005576]; ficolin-1-rich granule lumen [GO:1904813]; glutamatergic synapse [GO:0098978]; mitochondrion [GO:0005739]; nuclear speck [GO:0016607]; nucleoplasm [GO:0005654]; nucleus [GO:0005634]; secretory granule lumen [GO:0034774]; spindle pole [GO:0000922]; ATP binding [GO:0005524]; enzyme binding [GO:0019899]; MAP kinase acti…	3'-UTR-mediated mRNA stabilization [GO:0070935]; angiogenesis [GO:0001525]; apoptotic process [GO:0006915]; bone development [GO:0060348]; cartilage condensation [GO:0001502]; cell morphogenesis [GO:0000902]; cell surface receptor signaling pathway [GO:0007166]; cellular response to ionizing radiation [GO:0071479]; cellular response to lipopolysaccharide [GO:0071222]; cellular response to lipotei…	Protein kinase superfamily, CMGC Ser/Thr protein kinase family, MAP kinase subfamily	P48730-2; P28562; Q99956; P68104; P46734; P52564; P27361; P49137; Q16644; Q9BUB5; Q9HBH9; P35813; Q15256; P06400; O75676; Q8NEM7; Q92574; Q07352; O43257; P22736-1; Q15256-1; P54830-1; P28482; P49790
2bxm	P02768	0.0209064	4.6959	AHHHaromR	5		ALBU_HUMAN	Albumin	ALB GIG20 GIG42 PRO0903 PRO1708 PRO2044 PRO2619 PRO2675 UNQ696/PRO1341		DISEASE: Hyperthyroxinemia, familial dysalbuminemic (FDAH) [MIM:615999]: A disorder characterized by abnormally elevated levels of total serum thyroxine (T4) in euthyroid patients. It is due to abnormal serum albumin that binds T4 with enhanced affinity. {ECO:0000269|PubMed:7852505, ECO:0000269|PubMed:8048949, ECO:0000269|PubMed:9329347, ECO:0000269|PubMed:9589637}. Note=The disease is caused by …	blood microparticle [GO:0072562]; cytoplasm [GO:0005737]; endoplasmic reticulum [GO:0005783]; endoplasmic reticulum lumen [GO:0005788]; extracellular exosome [GO:0070062]; extracellular region [GO:0005576]; extracellular space [GO:0005615]; Golgi apparatus [GO:0005794]; nucleus [GO:0005634]; platelet alpha granule lumen [GO:0031093]; protein-containing complex [GO:0032991]	antioxidant activity [GO:0016209]; chaperone binding [GO:0051087]; copper ion binding [GO:0005507]; DNA binding [GO:0003677]; enterobactin binding [GO:1903981]; exogenous protein binding [GO:0140272]; fatty acid binding [GO:0005504]; identical protein binding [GO:0042802]; pyridoxal phosphate binding [GO:0030170]; toxic substance binding [GO:0015643]; zinc ion binding [GO:0008270]	blood microparticle [GO:0072562]; cytoplasm [GO:0005737]; endoplasmic reticulum [GO:0005783]; endoplasmic reticulum lumen [GO:0005788]; extracellular exosome [GO:0070062]; extracellular region [GO:0005576]; extracellular space [GO:0005615]; Golgi apparatus [GO:0005794]; nucleus [GO:0005634]; platelet alpha granule lumen [GO:0031093]; protein-containing complex [GO:0032991]; antioxidant activity […	cellular response to starvation [GO:0009267]; maintenance of mitochondrion location [GO:0051659]; negative regulation of apoptotic process [GO:0043066]; negative regulation of programmed cell death [GO:0043069]; retina homeostasis [GO:0001895]	ALB/AFP/VDB family	P02768; P02786; Q8N5Z5; Q6GQQ9-2; Q07869; Q09028; Q86WT6-2; O76024
1kdk	P04278	0.0175212	6.2792	AAHH	4		SHBG_HUMAN	Sex hormone-binding globulin (SHBG) (Sex steroid-binding protein) (SBP) (Testis-specific androgen-binding protein) (ABP) (Testosterone-estradiol-binding globulin) (TeBG) (Testosterone-estrogen-binding globulin)	SHBG			extracellular exosome [GO:0070062]; extracellular region [GO:0005576]	androgen binding [GO:0005497]; steroid binding [GO:0005496]	extracellular exosome [GO:0070062]; extracellular region [GO:0005576]; androgen binding [GO:0005497]; steroid binding [GO:0005496]
3egk	P00734	0.0140579	6.3478	AHHHarom	4		THRB_HUMAN	Prothrombin (EC 3.4.21.5) (Coagulation factor II) [Cleaved into: Activation peptide fragment 1; Activation peptide fragment 2; Thrombin light chain; Thrombin heavy chain]	F2		DISEASE: Factor II deficiency (FA2D) [MIM:613679]: A very rare blood coagulation disorder characterized by mucocutaneous bleeding symptoms. The severity of the bleeding manifestations correlates with blood factor II levels. {ECO:0000269|PubMed:1349838, ECO:0000269|PubMed:1354985, ECO:0000269|PubMed:1421398, ECO:0000269|PubMed:14962227, ECO:0000269|PubMed:2719946, ECO:0000269|PubMed:3242619, ECO:0…	blood microparticle [GO:0072562]; collagen-containing extracellular matrix [GO:0062023]; endoplasmic reticulum lumen [GO:0005788]; extracellular exosome [GO:0070062]; extracellular region [GO:0005576]; extracellular space [GO:0005615]; Golgi lumen [GO:0005796]; plasma membrane [GO:0005886]; serine-type endopeptidase complex [GO:1905370]	calcium channel regulator activity [GO:0005246]; calcium ion binding [GO:0005509]; channel activator activity [GO:0099103]; growth factor activity [GO:0008083]; GTPase activator activity [GO:0005096]; heparin binding [GO:0008201]; ion channel regulator activity involved in G protein-coupled receptor signaling pathway [GO:0099107]; lipopolysaccharide binding [GO:0001530]; phospholipase activator a…	blood microparticle [GO:0072562]; collagen-containing extracellular matrix [GO:0062023]; endoplasmic reticulum lumen [GO:0005788]; extracellular exosome [GO:0070062]; extracellular region [GO:0005576]; extracellular space [GO:0005615]; Golgi lumen [GO:0005796]; plasma membrane [GO:0005886]; serine-type endopeptidase complex [GO:1905370]; calcium channel regulator activity [GO:0005246]; calcium io…	acute-phase response [GO:0006953]; antimicrobial humoral immune response mediated by antimicrobial peptide [GO:0061844]; blood coagulation [GO:0007596]; blood coagulation, common pathway [GO:0072377]; cell surface receptor signaling pathway [GO:0007166]; cytolysis by host of symbiont cells [GO:0051838]; fibrinolysis [GO:0042730]; ion channel modulating, G protein-coupled receptor signaling pathwa…	Peptidase S1 family	P05067; P07204; Q846V4; PRO_0000032489 [P01008]
3b2t	P21802	0.00542365	5.2971	AADHarom	4		FGFR2_HUMAN	Fibroblast growth factor receptor 2 (FGFR-2) (EC 2.7.10.1) (K-sam) (KGFR) (Keratinocyte growth factor receptor) (CD antigen CD332)	FGFR2 BEK KGFR KSAM		DISEASE: Crouzon syndrome (CS) [MIM:123500]: An autosomal dominant syndrome characterized by craniosynostosis, hypertelorism, exophthalmos and external strabismus, parrot-beaked nose, short upper lip, hypoplastic maxilla, and a relative mandibular prognathism. {ECO:0000269|PubMed:10574673, ECO:0000269|PubMed:11173845, ECO:0000269|PubMed:11380921, ECO:0000269|PubMed:11781872, ECO:0000269|PubMed:17…	cell cortex [GO:0005938]; cell surface [GO:0009986]; cytoplasm [GO:0005737]; cytoplasmic vesicle [GO:0031410]; excitatory synapse [GO:0060076]; extracellular region [GO:0005576]; Golgi apparatus [GO:0005794]; membrane [GO:0016020]; nucleus [GO:0005634]; plasma membrane [GO:0005886]; receptor complex [GO:0043235]	ATP binding [GO:0005524]; fibroblast growth factor binding [GO:0017134]; fibroblast growth factor receptor activity [GO:0005007]; heparin binding [GO:0008201]; identical protein binding [GO:0042802]; protein homodimerization activity [GO:0042803]; protein tyrosine kinase activity [GO:0004713]; transmembrane receptor protein tyrosine kinase activity [GO:0004714]	cell cortex [GO:0005938]; cell surface [GO:0009986]; cytoplasm [GO:0005737]; cytoplasmic vesicle [GO:0031410]; excitatory synapse [GO:0060076]; extracellular region [GO:0005576]; Golgi apparatus [GO:0005794]; membrane [GO:0016020]; nucleus [GO:0005634]; plasma membrane [GO:0005886]; receptor complex [GO:0043235]; ATP binding [GO:0005524]; fibroblast growth factor binding [GO:0017134]; fibroblast …	angiogenesis [GO:0001525]; animal organ morphogenesis [GO:0009887]; apoptotic process [GO:0006915]; axonogenesis [GO:0007409]; bone development [GO:0060348]; bone mineralization [GO:0030282]; bone morphogenesis [GO:0060349]; branch elongation involved in salivary gland morphogenesis [GO:0060667]; branching involved in labyrinthine layer morphogenesis [GO:0060670]; branching involved in prostate g…	Protein kinase superfamily, Tyr protein kinase family, Fibroblast growth factor receptor subfamily	P05230; PRO_0000008908 [P05230]; O15520; P09038; P09038-2; P11362; P62993; P03968; P05230-1; P09038; P21802-1; P19174; P21781; P03968
1hak	P08758	0.00465218	6.3478	AHHHarom	4		ANXA5_HUMAN	Annexin A5 (Anchorin CII) (Annexin V) (Annexin-5) (Calphobindin I) (CPB-I) (Endonexin II) (Lipocortin V) (Placental anticoagulant protein 4) (PP4) (Placental anticoagulant protein I) (PAP-I) (Thromboplastin inhibitor) (Vascular anticoagulant-alpha) (VAC-alpha)	ANXA5 ANX5 ENX2 PP4		DISEASE: Pregnancy loss, recurrent, 3 (RPRGL3) [MIM:614391]: A common complication of pregnancy, resulting in spontaneous abortion before the fetus has reached viability. The term includes all miscarriages from the time of conception until 24 weeks of gestation. Recurrent pregnancy loss is defined as 3 or more consecutive spontaneous abortions. {ECO:0000269|PubMed:17339269}. Note=Disease suscepti…	collagen-containing extracellular matrix [GO:0062023]; cytoplasm [GO:0005737]; cytosol [GO:0005829]; endothelial microparticle [GO:0072563]; external side of plasma membrane [GO:0009897]; extracellular exosome [GO:0070062]; extracellular region [GO:0005576]; focal adhesion [GO:0005925]; membrane [GO:0016020]	calcium ion binding [GO:0005509]; calcium-dependent phospholipid binding [GO:0005544]; phosphatidylserine binding [GO:0001786]; phospholipase inhibitor activity [GO:0004859]; phospholipid binding [GO:0005543]	collagen-containing extracellular matrix [GO:0062023]; cytoplasm [GO:0005737]; cytosol [GO:0005829]; endothelial microparticle [GO:0072563]; external side of plasma membrane [GO:0009897]; extracellular exosome [GO:0070062]; extracellular region [GO:0005576]; focal adhesion [GO:0005925]; membrane [GO:0016020]; calcium ion binding [GO:0005509]; calcium-dependent phospholipid binding [GO:0005544]; p…	blood coagulation [GO:0007596]; negative regulation of apoptotic process [GO:0043066]; negative regulation of coagulation [GO:0050819]; response to organic substance [GO:0010033]; signal transduction [GO:0007165]	Annexin family	O15499; P04792; Q96CV9; Q9BSI4; O76024
4kp5	O43570	0.00326704	6.2107	AAAHarom	4		CAH12_HUMAN	Carbonic anhydrase 12 (EC 4.2.1.1) (Carbonate dehydratase XII) (Carbonic anhydrase XII) (CA-XII) (Tumor antigen HOM-RCC-3.1.3)	CA12		DISEASE: Hyperchlorhidrosis, isolated (HYCHL) [MIM:143860]: An autosomal recessive disorder characterized by excessive sweating and increased sweat chloride levels. Affected individuals suffer from episodes of hyponatremic dehydration and report increased amounts of visible salt precipitates in sweat. {ECO:0000269|PubMed:21035102, ECO:0000269|PubMed:21184099, ECO:0000269|PubMed:26911677}. Note=Th…	apical plasma membrane [GO:0016324]; basolateral plasma membrane [GO:0016323]; membrane [GO:0016020]; plasma membrane [GO:0005886]	carbonate dehydratase activity [GO:0004089]; hydro-lyase activity [GO:0016836]; zinc ion binding [GO:0008270]	apical plasma membrane [GO:0016324]; basolateral plasma membrane [GO:0016323]; membrane [GO:0016020]; plasma membrane [GO:0005886]; carbonate dehydratase activity [GO:0004089]; hydro-lyase activity [GO:0016836]; zinc ion binding [GO:0008270]; chloride ion homeostasis [GO:0055064]; estrous cycle [GO:0044849]; one-carbon metabolic process [GO:0006730]	chloride ion homeostasis [GO:0055064]; estrous cycle [GO:0044849]; one-carbon metabolic process [GO:0006730]	Alpha-carbonic anhydrase family
2cjm	P20248	0.0016715	1.9932	AAAADHarom	6		CCNA2_HUMAN	Cyclin-A2 (Cyclin-A) (Cyclin A)	CCNA2 CCN1 CCNA			cyclin A2-CDK2 complex [GO:0097124]; cyclin-dependent protein kinase holoenzyme complex [GO:0000307]; cytoplasm [GO:0005737]; cytosol [GO:0005829]; female pronucleus [GO:0001939]; male pronucleus [GO:0001940]; nucleoplasm [GO:0005654]; nucleus [GO:0005634]	cyclin-dependent protein serine/threonine kinase regulator activity [GO:0016538]; protein domain specific binding [GO:0019904]; protein kinase binding [GO:0019901]	cyclin A2-CDK2 complex [GO:0097124]; cyclin-dependent protein kinase holoenzyme complex [GO:0000307]; cytoplasm [GO:0005737]; cytosol [GO:0005829]; female pronucleus [GO:0001939]; male pronucleus [GO:0001940]; nucleoplasm [GO:0005654]; nucleus [GO:0005634]; cyclin-dependent protein serine/threonine kinase regulator activity [GO:0016538]; protein domain specific binding [GO:0019904]; protein kinas…	animal organ regeneration [GO:0031100]; cell cycle G1/S phase transition [GO:0044843]; cell division [GO:0051301]; cellular response to cocaine [GO:0071314]; cellular response to estradiol stimulus [GO:0071392]; cellular response to hypoxia [GO:0071456]; cellular response to insulin-like growth factor stimulus [GO:1990314]; cellular response to leptin stimulus [GO:0044320]; cellular response to l…	Cyclin family, Cyclin AB subfamily	P31749; P24941; P38936; P46527; Q96PU4; P03129; P03070
3gph	P05181	0.000769974	6.3478	AHHH	4		CP2E1_HUMAN	Cytochrome P450 2E1 (EC 1.14.14.1) (4-nitrophenol 2-hydroxylase) (EC 1.14.13.n7) (CYPIIE1) (Cytochrome P450-J)	CYP2E1 CYP2E	PATHWAY: Lipid metabolism; fatty acid metabolism. {ECO:0000269|PubMed:10553002, ECO:0000269|PubMed:18577768}.		cytoplasm [GO:0005737]; endoplasmic reticulum membrane [GO:0005789]; Golgi membrane [GO:0000139]; intracellular membrane-bounded organelle [GO:0043231]; mitochondrial inner membrane [GO:0005743]	4-nitrophenol 2-monooxygenase activity [GO:0018601]; arachidonic acid epoxygenase activity [GO:0008392]; aromatase activity [GO:0070330]; enzyme binding [GO:0019899]; heme binding [GO:0020037]; Hsp70 protein binding [GO:0030544]; Hsp90 protein binding [GO:0051879]; iron ion binding [GO:0005506]; long-chain fatty acid omega-1 hydroxylase activity [GO:0120319]; monooxygenase activity [GO:0004497]; …	cytoplasm [GO:0005737]; endoplasmic reticulum membrane [GO:0005789]; Golgi membrane [GO:0000139]; intracellular membrane-bounded organelle [GO:0043231]; mitochondrial inner membrane [GO:0005743]; 4-nitrophenol 2-monooxygenase activity [GO:0018601]; arachidonic acid epoxygenase activity [GO:0008392]; aromatase activity [GO:0070330]; enzyme binding [GO:0019899]; heme binding [GO:0020037]; Hsp70 pro…	4-nitrophenol metabolic process [GO:0018960]; benzene metabolic process [GO:0018910]; carbon tetrachloride metabolic process [GO:0018885]; epoxygenase P450 pathway [GO:0019373]; halogenated hydrocarbon metabolic process [GO:0042197]; heterocycle metabolic process [GO:0046483]; lipid hydroxylation [GO:0002933]; long-chain fatty acid biosynthetic process [GO:0042759]; long-chain fatty acid metaboli…	Cytochrome P450 family
4hlk	Q9H2K2	0.000346216	6.2792	AHHaromR	4		TNKS2_HUMAN	Poly [ADP-ribose] polymerase tankyrase-2 (EC 2.4.2.30) (ADP-ribosyltransferase diphtheria toxin-like 6) (ARTD6) (Poly [ADP-ribose] polymerase 5B) (Protein poly-ADP-ribosyltransferase tankyrase-2) (EC 2.4.2.-) (TNKS-2) (TRF1-interacting ankyrin-related ADP-ribose polymerase 2) (Tankyrase II) (Tankyrase-2) (TANK2) (Tankyrase-like protein) (Tankyrase-related protein)	TNKS2 PARP5B TANK2 TNKL			chromosome, telomeric region [GO:0000781]; cytoplasm [GO:0005737]; cytosol [GO:0005829]; Golgi membrane [GO:0000139]; nuclear envelope [GO:0005635]; nucleus [GO:0005634]; pericentriolar material [GO:0000242]; perinuclear region of cytoplasm [GO:0048471]	enzyme binding [GO:0019899]; metal ion binding [GO:0046872]; NAD+ ADP-ribosyltransferase activity [GO:0003950]; NAD+-protein ADP-ribosyltransferase activity [GO:1990404]; nucleotidyltransferase activity [GO:0016779]; protein N-terminus binding [GO:0047485]	chromosome, telomeric region [GO:0000781]; cytoplasm [GO:0005737]; cytosol [GO:0005829]; Golgi membrane [GO:0000139]; nuclear envelope [GO:0005635]; nucleus [GO:0005634]; pericentriolar material [GO:0000242]; perinuclear region of cytoplasm [GO:0048471]; enzyme binding [GO:0019899]; metal ion binding [GO:0046872]; NAD+ ADP-ribosyltransferase activity [GO:0003950]; NAD+-protein ADP-ribosyltransfer…	multicellular organism growth [GO:0035264]; negative regulation of telomere maintenance via telomere lengthening [GO:1904357]; positive regulation of canonical Wnt signaling pathway [GO:0090263]; positive regulation of telomere capping [GO:1904355]; positive regulation of telomere maintenance via telomerase [GO:0032212]; protein auto-ADP-ribosylation [GO:0070213]; protein localization to chromoso…	ARTD/PARP family	O15084; Q7Z6K5-1; O15169; Q9NWV8; P11274; Q13698; Q9NRI5; Q6V0I7; Q9NWT6; P14652; Q9UIQ6; Q14980; Q9BZL4; Q92698; P78314; O43815; P54274; Q9C0C2; Q06649
4qna	Q9Y6E0	0.000234317	5.2971	AADHarom	4		STK24_HUMAN	Serine/threonine-protein kinase 24 (EC 2.7.11.1) (Mammalian STE20-like protein kinase 3) (MST-3) (STE20-like kinase MST3) [Cleaved into: Serine/threonine-protein kinase 24 36 kDa subunit (Mammalian STE20-like protein kinase 3 N-terminal) (MST3/N); Serine/threonine-protein kinase 24 12 kDa subunit (Mammalian STE20-like protein kinase 3 C-terminal) (MST3/C)]	STK24 MST3 STK3			cytoplasm [GO:0005737]; cytosol [GO:0005829]; extracellular exosome [GO:0070062]; Golgi apparatus [GO:0005794]; Golgi membrane [GO:0000139]; nucleolus [GO:0005730]; nucleoplasm [GO:0005654]; nucleus [GO:0005634]	ATP binding [GO:0005524]; cadherin binding [GO:0045296]; metal ion binding [GO:0046872]; protein kinase activity [GO:0004672]; protein serine kinase activity [GO:0106310]; protein serine/threonine kinase activity [GO:0004674]	cytoplasm [GO:0005737]; cytosol [GO:0005829]; extracellular exosome [GO:0070062]; Golgi apparatus [GO:0005794]; Golgi membrane [GO:0000139]; nucleolus [GO:0005730]; nucleoplasm [GO:0005654]; nucleus [GO:0005634]; ATP binding [GO:0005524]; cadherin binding [GO:0045296]; metal ion binding [GO:0046872]; protein kinase activity [GO:0004672]; protein serine kinase activity [GO:0106310]; protein serine…	cellular response to starvation [GO:0009267]; execution phase of apoptosis [GO:0097194]; intrinsic apoptotic signaling pathway in response to oxidative stress [GO:0008631]; negative regulation of cell migration [GO:0030336]; positive regulation of axon regeneration [GO:0048680]; protein autophosphorylation [GO:0046777]; protein phosphorylation [GO:0006468]; regulation of axon regeneration [GO:004…	Protein kinase superfamily, STE Ser/Thr protein kinase family, STE20 subfamily	Q9P2B4; Q9BUL8; Q5VSL9; O43815; Q9Y228; Q9Y376; Q9BUL8
4gfo	P29597	6.52846e-05	5.3657	ADHaromHarom	4		TYK2_HUMAN	Non-receptor tyrosine-protein kinase TYK2 (EC 2.7.10.2)	TYK2		DISEASE: Immunodeficiency 35 (IMD35) [MIM:611521]: A primary immunodeficiency characterized by recurrent skin abscesses, pneumonia, and highly elevated serum IgE. {ECO:0000269|PubMed:17088085}. Note=The disease is caused by variants affecting the gene represented in this entry.	cytoplasm [GO:0005737]; cytoskeleton [GO:0005856]; cytosol [GO:0005829]; extracellular exosome [GO:0070062]; interleukin-12 receptor complex [GO:0042022]; interleukin-23 receptor complex [GO:0072536]; nucleus [GO:0005634]	ATP binding [GO:0005524]; cytokine receptor binding [GO:0005126]; growth hormone receptor binding [GO:0005131]; non-membrane spanning protein tyrosine kinase activity [GO:0004715]; protein tyrosine kinase activity [GO:0004713]; type 1 angiotensin receptor binding [GO:0031702]	cytoplasm [GO:0005737]; cytoskeleton [GO:0005856]; cytosol [GO:0005829]; extracellular exosome [GO:0070062]; interleukin-12 receptor complex [GO:0042022]; interleukin-23 receptor complex [GO:0072536]; nucleus [GO:0005634]; ATP binding [GO:0005524]; cytokine receptor binding [GO:0005126]; growth hormone receptor binding [GO:0005131]; non-membrane spanning protein tyrosine kinase activity [GO:00047…	cell differentiation [GO:0030154]; cellular response to virus [GO:0098586]; cytokine-mediated signaling pathway [GO:0019221]; growth hormone receptor signaling pathway via JAK-STAT [GO:0060397]; immune response [GO:0006955]; intracellular signal transduction [GO:0035556]; positive regulation of interleukin-17 production [GO:0032740]; positive regulation of natural killer cell proliferation [GO:00…	Protein kinase superfamily, Tyr protein kinase family, JAK subfamily	O95994; Q9ULX6; A8MQ03; Q13643; A6NEM1; P61978; P61978-2; P08238; P17181-1; O60674; Q5VWX1; O75525; Q15323; Q6A162; Q9NQX1-2; P52630; Q05BL1; Q9BUZ4
5dsg	P08173	4.61735e-05	3.7823	ADHHaromHarom	5		ACM4_HUMAN	Muscarinic acetylcholine receptor M4	CHRM4			dendrite [GO:0030425]; plasma membrane [GO:0005886]; postsynaptic membrane [GO:0045211]; synapse [GO:0045202]	G protein-coupled acetylcholine receptor activity [GO:0016907]; G protein-coupled serotonin receptor activity [GO:0004993]; neurotransmitter receptor activity [GO:0030594]	dendrite [GO:0030425]; plasma membrane [GO:0005886]; postsynaptic membrane [GO:0045211]; synapse [GO:0045202]; G protein-coupled acetylcholine receptor activity [GO:0016907]; G protein-coupled serotonin receptor activity [GO:0004993]; neurotransmitter receptor activity [GO:0030594]; adenylate cyclase-inhibiting G protein-coupled acetylcholine receptor signaling pathway [GO:0007197]; cell surface …	adenylate cyclase-inhibiting G protein-coupled acetylcholine receptor signaling pathway [GO:0007197]; cell surface receptor signaling pathway [GO:0007166]; chemical synaptic transmission [GO:0007268]; G protein-coupled acetylcholine receptor signaling pathway [GO:0007213]; G protein-coupled receptor signaling pathway, coupled to cyclic nucleotide second messenger [GO:0007187]; regulation of locom…	G-protein coupled receptor 1 family, Muscarinic acetylcholine receptor subfamily, CHRM4 sub-subfamily
2c3i	P11309	4.4584e-05	6.3478	AHHaromHarom	4		PIM1_HUMAN	Serine/threonine-protein kinase pim-1 (EC 2.7.11.1)	PIM1			cytoplasm [GO:0005737]; cytosol [GO:0005829]; nucleolus [GO:0005730]; nucleoplasm [GO:0005654]; nucleus [GO:0005634]; plasma membrane [GO:0005886]	ATP binding [GO:0005524]; manganese ion binding [GO:0030145]; protein serine kinase activity [GO:0106310]; protein serine/threonine kinase activator activity [GO:0043539]; protein serine/threonine kinase activity [GO:0004674]; ribosomal small subunit binding [GO:0043024]; transcription factor binding [GO:0008134]	cytoplasm [GO:0005737]; cytosol [GO:0005829]; nucleolus [GO:0005730]; nucleoplasm [GO:0005654]; nucleus [GO:0005634]; plasma membrane [GO:0005886]; ATP binding [GO:0005524]; manganese ion binding [GO:0030145]; protein serine kinase activity [GO:0106310]; protein serine/threonine kinase activator activity [GO:0043539]; protein serine/threonine kinase activity [GO:0004674]; ribosomal small subunit …	apoptotic process [GO:0006915]; cell cycle [GO:0007049]; cellular detoxification [GO:1990748]; negative regulation of apoptotic process [GO:0043066]; negative regulation of DNA-binding transcription factor activity [GO:0043433]; positive regulation of brown fat cell differentiation [GO:0090336]; positive regulation of cardiac muscle cell proliferation [GO:0060045]; positive regulation of cardiobl…	Protein kinase superfamily, CAMK Ser/Thr protein kinase family, PIM subfamily	Q8N9N5; Q8N7W2-2; P51813; P07954; P51116; Q96MH2; Q5T203; P39019; P0C1Z6-2; Q9Y2K1; P46527; O43524; Q9BZS1-1; Q9UNQ0; P51813; P17252
4bbe	O60674	3.83911e-05	3.7137	AADHaromHarom	5		JAK2_HUMAN	Tyrosine-protein kinase JAK2 (EC 2.7.10.2) (Janus kinase 2) (JAK-2)	JAK2		DISEASE: Note=Chromosomal aberrations involving JAK2 are found in both chronic and acute forms of eosinophilic, lymphoblastic and myeloid leukemia. Translocation t(8;9)(p22;p24) with PCM1 links the protein kinase domain of JAK2 to the major portion of PCM1. Translocation t(9;12)(p24;p13) with ETV6.; DISEASE: Budd-Chiari syndrome (BDCHS) [MIM:600880]: A syndrome caused by obstruction of hepatic ve…	caveola [GO:0005901]; cytoplasm [GO:0005737]; cytoskeleton [GO:0005856]; cytosol [GO:0005829]; endosome lumen [GO:0031904]; euchromatin [GO:0000791]; focal adhesion [GO:0005925]; glutamatergic synapse [GO:0098978]; granulocyte macrophage colony-stimulating factor receptor complex [GO:0030526]; interleukin-12 receptor complex [GO:0042022]; interleukin-23 receptor complex [GO:0072536]; membrane raf…	acetylcholine receptor binding [GO:0033130]; ATP binding [GO:0005524]; cytokine receptor binding [GO:0005126]; growth hormone receptor binding [GO:0005131]; heme binding [GO:0020037]; histone binding [GO:0042393]; histone H3Y41 kinase activity [GO:0035401]; identical protein binding [GO:0042802]; insulin receptor substrate binding [GO:0043560]; interleukin-12 receptor binding [GO:0005143]; metal …	caveola [GO:0005901]; cytoplasm [GO:0005737]; cytoskeleton [GO:0005856]; cytosol [GO:0005829]; endosome lumen [GO:0031904]; euchromatin [GO:0000791]; focal adhesion [GO:0005925]; glutamatergic synapse [GO:0098978]; granulocyte macrophage colony-stimulating factor receptor complex [GO:0030526]; interleukin-12 receptor complex [GO:0042022]; interleukin-23 receptor complex [GO:0072536]; membrane raf…	actin filament polymerization [GO:0030041]; activation of cysteine-type endopeptidase activity involved in apoptotic process [GO:0006919]; activation of cysteine-type endopeptidase activity involved in apoptotic signaling pathway [GO:0097296]; activation of Janus kinase activity [GO:0042976]; adaptive immune response [GO:0002250]; apoptotic process [GO:0006915]; axon regeneration [GO:0031103]; ce…	Protein kinase superfamily, Tyr protein kinase family, JAK subfamily	P32927; Q01344; P23458; O60674; P40238; P16333; P18031; O75116; P29597; Q9JHI9
1gg5	P15559	3.44038e-05	6.2107	AHRR	4		NQO1_HUMAN	NAD(P)H dehydrogenase [quinone] 1 (EC 1.6.5.2) (Azoreductase) (DT-diaphorase) (DTD) (Menadione reductase) (NAD(P)H:quinone oxidoreductase 1) (Phylloquinone reductase) (Quinone reductase 1) (QR1)	NQO1 DIA4 NMOR1			cytoplasm [GO:0005737]; cytosol [GO:0005829]; dendrite [GO:0030425]; neuronal cell body [GO:0043025]; nucleus [GO:0005634]; synapse [GO:0045202]	cytochrome-b5 reductase activity, acting on NAD(P)H [GO:0004128]; identical protein binding [GO:0042802]; NAD(P)H dehydrogenase (quinone) activity [GO:0003955]; NADH dehydrogenase (quinone) activity [GO:0050136]; NADPH dehydrogenase (quinone) activity [GO:0008753]; RNA binding [GO:0003723]; superoxide dismutase activity [GO:0004784]	cytoplasm [GO:0005737]; cytosol [GO:0005829]; dendrite [GO:0030425]; neuronal cell body [GO:0043025]; nucleus [GO:0005634]; synapse [GO:0045202]; cytochrome-b5 reductase activity, acting on NAD(P)H [GO:0004128]; identical protein binding [GO:0042802]; NAD(P)H dehydrogenase (quinone) activity [GO:0003955]; NADH dehydrogenase (quinone) activity [GO:0050136]; NADPH dehydrogenase (quinone) activity […	aging [GO:0007568]; cell redox homeostasis [GO:0045454]; cellular response to hydrogen peroxide [GO:0070301]; cellular response to metal ion [GO:0071248]; cellular response to oxidative stress [GO:0034599]; innate immune response [GO:0045087]; NADH oxidation [GO:0006116]; NADPH oxidation [GO:0070995]; negative regulation of apoptotic process [GO:0043066]; negative regulation of catalytic activity…	NAD(P)H dehydrogenase (quinone) family	P07902; Q9UK53; P15559
4ih3	Q8TDX5	2.9363e-05	5.2285	AAAD	4		ACMSD_HUMAN	2-amino-3-carboxymuconate-6-semialdehyde decarboxylase (EC 4.1.1.45) (Picolinate carboxylase)	ACMSD	PATHWAY: Secondary metabolite metabolism; quinolate metabolism. {ECO:0000305|PubMed:12140278}.		cytoplasm [GO:0005737]; cytosol [GO:0005829]	aminocarboxymuconate-semialdehyde decarboxylase activity [GO:0001760]; carboxy-lyase activity [GO:0016831]; hydrolase activity [GO:0016787]; zinc ion binding [GO:0008270]	cytoplasm [GO:0005737]; cytosol [GO:0005829]; aminocarboxymuconate-semialdehyde decarboxylase activity [GO:0001760]; carboxy-lyase activity [GO:0016831]; hydrolase activity [GO:0016787]; zinc ion binding [GO:0008270]; negative regulation of quinolinate biosynthetic process [GO:1904985]; picolinic acid biosynthetic process [GO:1905004]; regulation of 'de novo' NAD biosynthetic process from tryptop…	negative regulation of quinolinate biosynthetic process [GO:1904985]; picolinic acid biosynthetic process [GO:1905004]; regulation of 'de novo' NAD biosynthetic process from tryptophan [GO:1905012]; secondary metabolic process [GO:0019748]; tryptophan catabolic process [GO:0006569]	Metallo-dependent hydrolases superfamily, ACMSD family	P43364-2; Q9Y4H4; Q8N6Y0
4im0	Q9UHD2	2.57204e-05	2.1303	AADHHHarom	6		TBK1_HUMAN	Serine/threonine-protein kinase TBK1 (EC 2.7.11.1) (NF-kappa-B-activating kinase) (T2K) (TANK-binding kinase 1)	TBK1 NAK		DISEASE: Glaucoma 1, open angle, P (GLC1P) [MIM:177700]: A form of primary open angle glaucoma (POAG). POAG is characterized by a specific pattern of optic nerve and visual field defects. The angle of the anterior chamber of the eye is open, and usually the intraocular pressure is increased. However, glaucoma can occur at any intraocular pressure. The disease is generally asymptomatic until the l…	cytoplasm [GO:0005737]; cytosol [GO:0005829]; intracellular membrane-bounded organelle [GO:0043231]; nucleoplasm [GO:0005654]; serine/threonine protein kinase complex [GO:1902554]	ATP binding [GO:0005524]; identical protein binding [GO:0042802]; nucleic acid binding [GO:0003676]; phosphoprotein binding [GO:0051219]; protein kinase activity [GO:0004672]; protein phosphatase binding [GO:0019903]; protein serine kinase activity [GO:0106310]; protein serine/threonine kinase activity [GO:0004674]	cytoplasm [GO:0005737]; cytosol [GO:0005829]; intracellular membrane-bounded organelle [GO:0043231]; nucleoplasm [GO:0005654]; serine/threonine protein kinase complex [GO:1902554]; ATP binding [GO:0005524]; identical protein binding [GO:0042802]; nucleic acid binding [GO:0003676]; phosphoprotein binding [GO:0051219]; protein kinase activity [GO:0004672]; protein phosphatase binding [GO:0019903]; …	activation of innate immune response [GO:0002218]; defense response to Gram-positive bacterium [GO:0050830]; defense response to virus [GO:0051607]; dendritic cell proliferation [GO:0044565]; I-kappaB kinase/NF-kappaB signaling [GO:0007249]; inflammatory response [GO:0006954]; innate immune response [GO:0045087]; negative regulation of gene expression [GO:0010629]; peptidyl-serine phosphorylation…	Protein kinase superfamily, Ser/Thr protein kinase family, I-kappa-B kinase subfamily	Q9UKV8; Q7Z3C6; Q9H6S1; Q13137; Q6DT37; P08238; Q9Y6W8; Q14164; Q9Y6K9; Q14653; Q92985; Q7Z434; Q86YT6; Q96AX9; Q9NVV4; Q96CV9; O14730; P42226; Q86WV6; Q92844; A7MCY6; Q8IUC6; Q12933; Q13114; O95801; P40222; Q62167; O41932; P0DTC5; P59596; PRO_0000449630 [P0DTD1]; Q60803; Q8BHN1; Q05127; I0DF37; I6W9F2; K7Y1A2; PRO_0000037572 [P27958]; PRO_0000037573 [P27958]
3t3q	P11509	1.04364e-05	6.2792	AAHH	4		CP2A6_HUMAN	Cytochrome P450 2A6 (EC 1.14.14.-) (1,4-cineole 2-exo-monooxygenase) (CYPIIA6) (Coumarin 7-hydroxylase) (Cytochrome P450 IIA3) (Cytochrome P450(I))	CYP2A6 CYP2A3			cytoplasm [GO:0005737]; cytoplasmic microtubule [GO:0005881]; endoplasmic reticulum membrane [GO:0005789]; intracellular membrane-bounded organelle [GO:0043231]	arachidonic acid epoxygenase activity [GO:0008392]; coumarin 7-hydroxylase activity [GO:0008389]; enzyme binding [GO:0019899]; heme binding [GO:0020037]; iron ion binding [GO:0005506]; oxidoreductase activity, acting on paired donors, with incorporation or reduction of molecular oxygen, reduced flavin or flavoprotein as one donor, and incorporation of one atom of oxygen [GO:0016712]; steroid hydr…	cytoplasm [GO:0005737]; cytoplasmic microtubule [GO:0005881]; endoplasmic reticulum membrane [GO:0005789]; intracellular membrane-bounded organelle [GO:0043231]; arachidonic acid epoxygenase activity [GO:0008392]; coumarin 7-hydroxylase activity [GO:0008389]; enzyme binding [GO:0019899]; heme binding [GO:0020037]; iron ion binding [GO:0005506]; oxidoreductase activity, acting on paired donors, wi…	coumarin catabolic process [GO:0046226]; coumarin metabolic process [GO:0009804]; epoxygenase P450 pathway [GO:0019373]; organic acid metabolic process [GO:0006082]; steroid metabolic process [GO:0008202]; xenobiotic catabolic process [GO:0042178]; xenobiotic metabolic process [GO:0006805]	Cytochrome P450 family
1u3w	P00326	3.24327e-06	6.3478	AHHH	4		ADH1G_HUMAN	Alcohol dehydrogenase 1C (EC 1.1.1.1) (Alcohol dehydrogenase subunit gamma)	ADH1C ADH3			cytosol [GO:0005829]; nucleoplasm [GO:0005654]; plasma membrane [GO:0005886]	alcohol dehydrogenase (NAD+) activity [GO:0004022]; alcohol dehydrogenase activity, zinc-dependent [GO:0004024]; NAD-retinol dehydrogenase activity [GO:0004745]; zinc ion binding [GO:0008270]	cytosol [GO:0005829]; nucleoplasm [GO:0005654]; plasma membrane [GO:0005886]; alcohol dehydrogenase (NAD+) activity [GO:0004022]; alcohol dehydrogenase activity, zinc-dependent [GO:0004024]; NAD-retinol dehydrogenase activity [GO:0004745]; zinc ion binding [GO:0008270]; ethanol oxidation [GO:0006069]; retinoic acid metabolic process [GO:0042573]; retinol metabolic process [GO:0042572]	ethanol oxidation [GO:0006069]; retinoic acid metabolic process [GO:0042573]; retinol metabolic process [GO:0042572]	Zinc-containing alcohol dehydrogenase family
4hg7	Q00987	7.41769e-09	4.7644	HHHHaromR	5		MDM2_HUMAN	E3 ubiquitin-protein ligase Mdm2 (EC 2.3.2.27) (Double minute 2 protein) (Hdm2) (Oncoprotein Mdm2) (RING-type E3 ubiquitin transferase Mdm2) (p53-binding protein Mdm2)	MDM2		DISEASE: Note=Seems to be amplified in certain tumors (including soft tissue sarcomas, osteosarcomas and gliomas). A higher frequency of splice variants lacking p53 binding domain sequences was found in late-stage and high-grade ovarian and bladder carcinomas. Four of the splice variants show loss of p53 binding.; DISEASE: Lessel-Kubisch syndrome (LSKB) [MIM:618681]: An autosomal recessive proger…	cytoplasm [GO:0005737]; cytosol [GO:0005829]; endocytic vesicle membrane [GO:0030666]; nucleolus [GO:0005730]; nucleoplasm [GO:0005654]; nucleus [GO:0005634]; plasma membrane [GO:0005886]; protein-containing complex [GO:0032991]; transcription repressor complex [GO:0017053]	5S rRNA binding [GO:0008097]; disordered domain specific binding [GO:0097718]; enzyme binding [GO:0019899]; identical protein binding [GO:0042802]; ligase activity [GO:0016874]; NEDD8 ligase activity [GO:0061663]; p53 binding [GO:0002039]; protein domain specific binding [GO:0019904]; protein N-terminus binding [GO:0047485]; ribonucleoprotein complex binding [GO:0043021]; SUMO transferase activit…	cytoplasm [GO:0005737]; cytosol [GO:0005829]; endocytic vesicle membrane [GO:0030666]; nucleolus [GO:0005730]; nucleoplasm [GO:0005654]; nucleus [GO:0005634]; plasma membrane [GO:0005886]; protein-containing complex [GO:0032991]; transcription repressor complex [GO:0017053]; 5S rRNA binding [GO:0008097]; disordered domain specific binding [GO:0097718]; enzyme binding [GO:0019899]; identical prote…	amyloid fibril formation [GO:1990000]; apoptotic process [GO:0006915]; atrial septum development [GO:0003283]; atrioventricular valve morphogenesis [GO:0003181]; blood vessel development [GO:0001568]; blood vessel remodeling [GO:0001974]; cardiac septum morphogenesis [GO:0060411]; cellular response to actinomycin D [GO:0072717]; cellular response to gamma radiation [GO:0071480]; cellular response…	MDM2/MDM4 family	P31749; P10275; P49407; Q9Y297; P42574; Q8N726; P48729; P48729-2; P48730; P49674; Q13616; Q9UER7; P78352; P68104; P03372; P15311; Q9UKB1; Q00688; Q9BVP2; Q9NVN8; Q5T7V8; P25098; P61978; Q8N9B5; P05412; P17535; Q00987; O15151; P19338; P06748; Q15466; P49757; Q96FW1; P53350; P29590; P29590-5; O15297; Q13362; P25788; P61289; Q9NS23; P06400; Q6PCD5; Q9Y4L5; P62913; P62829; P46777; P42677; Q71UM5; P23…

## Sheet: T2
Table S2: WikiPathway Analysis: 12 h vs. DMSO control
Pathway	#Total	#Up	Up List	#Down	Down List	Significance	p-value
VEGFA-VEGFR2 signaling	87	23	GAB1,TPCN2,NRP1,PTPN11,CDC42,LIMK1,VAV2,PTPRJ,RPS6KB1,CAMKK2,EEA1,PTPN1,NFATC2,SRF,ENG,TMEM170A,IER5,EIF4G1,HYOU1,RPL7,FSCN1,PTPN14,RPL27	64	MAP2K6,FAF1,RAC1,CAPN2,ROCK1,MAP2K1,RAF1,HSP90AA1,PAK1,CFL1,ACP1,TXN,EIF2AK3,EIF2A,ATF4,CTNND1,STAM,MYO6,EIF4E,IGFBP7,BIRC5,GPX1,CYCS,TRAF3IP2,PNP,APOLD1,SIAH2,LARP7,SDCBP,ALDOA,ARF4,ATP6V0D1,CSRP2,DECR1,DNAJA1,DPM1,EIF3H,IDH2,LDHA,PABPC1,PGK1,PPP1CA,PRDX2,PRDX6,PRKRA,SARS,SPIRE1,SRP54,ATP6V1E1,CAPZB,CCT7,CSRP1,EPRS,FARSB,MOV10,NAPA,NEXN,PSMD4,RCN1,TMSB10,TPM3,TRIP4,TXNDC5,ZC3H15	32.71	0.000000
Ciliary landscape	56	5	ERF,DGKE,IFT172,COX6C,PSMC6	51	DYNLL1,COPS4,GLA,IFT52,MFAP1,NDUFA9,LZTFL1,TSSC1,CEP170,COPS2,CTBP2,SNRPB2,WEE1,COPS8,LSM4,COPS6,MCM10,IFT74,MSH2,COPS3,ARL8B,MCM6,CLUAP1,AIMP1,ECHS1,EXOSC9,RB1,IFT22,EXOC6,EXOC1,BBS2,BBS4,DYNLRB1,MAPRE2,DYNC1I2,VIM,GLB1,RANBP9,PGRMC2,HTRA2,IQGAP2,LRPPRC,RAC1,EIF5B,PSMD13,AAR2,DOCK5,SMC4,PSMD7,RNGTT,PSMC4	27.85	0.000000
Electron transport chain: OXPHOS system in mitochondria	39	5	ATP5I,COX6C,ND6,NDUFA1,ATP5G3	34	COX6B1,ATP5J2,ATP5B,NDUFA3,SLC25A14,NDUFA6,NDUFB9,NDUFS6,NDUFA2,UQCRC2,COX11,ATP5J,SDHB,COX7A2L,COX6A1,COX4I1,ATP5L,NDUFB1,NDUFA9,ATP5G1,NDUFB4,SDHA,SLC25A4,SDHD,UQCRC1,NDUFS3,COX8A,NDUFA7,NDUFC2,ATP5D,NDUFB10,ATP5F1,ATP5C1,NDUFS8	45286	0.000000
Nonalcoholic fatty liver disease	44	7	PIK3CD,IL1B,ADIPOR2,CDC42,NDUFA1,NDUFA13,COX6C	37	ADIPOR1,RAC1,CASP3,CASP7,NDUFA2,NDUFA3,NDUFA6,NDUFA7,NDUFA9,NDUFA11,NDUFB1,NDUFB4,NDUFB9,NDUFB10,NDUFB11,NDUFS3,NDUFS6,NDUFS8,NDUFC2,NDUFC2-KCTD14,SDHA,SDHB,SDHD,UQCRC1,UQCRC2,UQCR10,COX4I1,COX6A1,COX6B1,COX7A2L,COX8A,CYCS,EIF2AK3,XBP1,ATF4,EIF2S1,BID	23.63	0.000000
Retinoblastoma gene in cancer	32	0		32	RAF1,FAF1,SMC2,PLK4,RRM2,TYMS,POLA1,CDK1,RFC5,RFC4,CCNE2,MCM6,CDK4,CDK2,MIR21,CCNB1,POLE2,RBBP7,WEE1,SKP2,H2AFZ,TTK,CHEK1,RB1,HMGB2,PRKDC,HLTF,PCNA,CCNA2,STMN1,RRM1,RFC3	20.74	0.000000
miR-targeted genes in lymphocytes	75	18	NOTCH2,PDLIM5,IPO4,KRAS,FNDC3B,NRP1,PTPRJ,GFPT1,PPP3R1,LUZP1,ADAR,FADS1,METTL7A,BRI3BP,NUFIP2,MYLIP,MIR17,MIR20A	57	TYMS,IFRD1,POLR2C,RCN2,RTN4,CSRP1,RHOG,RB1,DHX40,RAB34,ANP32B,ATP6V1C1,CDK5RAP1,HARS,MLLT11,GALNT7,MTX1,BET1,SLC25A13,RARS,TXN2,PPIF,AURKB,GOLGA7,NARS,ACAA2,TDG,ARFIP1,TMEM59,CHD1,CHMP2A,TRIP13,ANXA2,TPM3,SDCBP,DHX15,ATG3,EIF4E,RHEB,MOV10,PWP1,ATP6V1F,CARHSP1,PGRMC1,ARF4,GSTM4,TAF9B,IDH1,ARFIP2,AP3B1,YWHAQ,MATR3,PPP1R7,DOCK5,GEMIN7,MIR196B,MIR21	20.32	0.000000
Proteasome degradation	27	1	PSMC6	26	UBC,PSMA2,PSME1,PSMD9,PSMB8,PSMD7,PSMB4,UBE2D3,PSMC3,H2AFZ,PSMB9,PSMD10,HLA-J,PSMD13,PSMA1,PSMA6,PSMB5,PSMC1,UBE2D1,PSMC4,PSMD4,PSMA4,PSME2,PSMB7,PSMC2,PSMB3	19.70	0.000000
Alzheimer's disease	51	10	ATG14,PPP3R1,PLCB2,IL1B,MCU,PIK3CD,KRAS,FZD8,LRP6,PSMC6	41	NAE1,RTN3,PSENEN,BID,CYCS,CASP3,EIF2AK3,CAPN2,CDK5,CASP7,RTN4,RAF1,ATG101,PIK3R4,NRBF2,WIPI1,EIF2S1,ATF4,XBP1,PSMA2,PSMB4,PSMA1,PSMA6,PSMB5,PSMA4,PSMB7,PSMB3,PSMC4,PSMC3,PSMC2,PSMC1,PSMD7,PSMD4,PSMD14,PSMD13,PSMD9,PPIF,SLC25A4,VDAC2,VDAC3,MAP2K1	18.50	0.000000
miR-targeted genes in epithelium	57	13	GFPT1,MIR17,NRP1,ADAR,IPO4,PDLIM5,FNDC3B,NUFIP2,MIR20A,KRAS,FADS1,BRI3BP,NOTCH2	44	IFRD1,GALNT7,TXN2,TRIP13,TMEM59,HARS,GOLGA7,IDH1,DOCK5,POLR2C,DHX40,ATG3,TPM3,MATR3,MTX1,ACAA2,CSRP1,NARS,AURKB,MIR21,CHD1,RCN2,ANP32B,CHMP2A,RAB34,ARFIP2,CDK5RAP1,TDG,DHX15,YWHAQ,TYMS,RB1,GEMIN7,ARF4,RARS,RTN4,PPIF,PGRMC1,PPP1R7,GSTM4,ANXA2,RHEB,SDCBP,MIR196B	17.46	0.000000
EGF/EGFR signaling pathway	37	19	ELK4,ERRFI1,KRAS,SP1,RPS6KA3,VAV2,GAB2,CDC42,RPS6KB1,ASAP1,ERBB2,RICTOR,GAB1,RPS6KA1,JUND,PTPN11,MAP3K2,PIK3C2B,CBLB	18	STMN1,ATF1,PCNA,NCK2,MAP2K1,RAF1,STAMBP,AURKA,EIF4EBP1,RAC1,ABI1,PLSCR1,ROCK1,STAM,MAP2K5,PAK1,CFL1,AP2M1	16.55	0.000000
Cell cycle	31	1	YWHAG	30	CDK7,MAD2L2,PCNA,CDK2,CCNA2,RB1,CDK1,CDC20,CDC25C,CCNE2,SKP1,GADD45A,CDC6,SKP2,BUB3,YWHAH,YWHAQ,WEE1,CDK4,MCM6,PRKDC,ORC3,ORC4,CCNB1,E2F5,TTK,RAD21,ANAPC13,ANAPC5,CDC23	15.49	0.000000
Alzheimer's disease and miRNA effects	52	10	ATG14,PPP3R1,PLCB2,IL1B,MCU,PIK3CD,KRAS,FZD8,LRP6,PSMC6	42	NAE1,RTN3,PSENEN,BID,CYCS,CASP3,EIF2AK3,CAPN2,CDK5,CASP7,MIR21,RTN4,RAF1,ATG101,PIK3R4,NRBF2,WIPI1,EIF2S1,ATF4,XBP1,PSMA2,PSMB4,PSMA1,PSMA6,PSMB5,PSMA4,PSMB7,PSMB3,PSMC4,PSMC3,PSMC2,PSMC1,PSMD7,PSMD4,PSMD14,PSMD13,PSMD9,PPIF,SLC25A4,VDAC2,VDAC3,MAP2K1	14.99	0.000000
RNA pol II transcription - Initiation and elongation	26	5	GTF2A1,TAF8,TAF13,MED22,AFF4	21	SUPT4H1,NELFCD,NELFE,LEO1,LARP7,CDK7,GTF2F2,GTF2E2,GTF2A2,GTF2B,TAF2,TAF5,TAF9,TAF9B,TAF10,TAF12,MED8,MED19,MED20,MED30,CDK8	14.74	0.000000
miR-targeted genes in muscle cell	57	16	FNDC3B,PDLIM5,NRP1,ERBB2,NOTCH2,SRF,METTL7A,PTPRJ,IPO4,KRAS,NUFIP2,GFPT1,ADAR,LUZP1,MIR17,MIR20A	41	DHX15,PPIF,ATP6V1C1,RHOG,IFRD1,CARHSP1,SDCBP,TPM3,GEMIN7,CHD1,TDG,ACAA2,TXN2,CSRP1,GALNT7,MOV10,EIF4E,GSTM4,RAB34,TYMS,PGRMC1,ANP32B,PWP1,YWHAQ,SLC25A13,RB1,DOCK5,BET1,AP3B1,RCN2,CHMP2A,PPP1R7,CDK5RAP1,POLR2C,RTN4,MATR3,RARS,RHEB,DHX40,ARF4,MIR21	13.96	0.000000
Eukaryotic transcription initiation	18	2	TAF13,POLR1A	16	CDK7,GTF2A2,ILK,GTF2F2,GTF2B,POLR2K,TAF12,POLR2B,POLR2E,POLR2C,TAF5,POLR2I,POLR2H,TAF9,GTF2E2,POLR2F	13.88	0.000000
Mitochondrial complex I assembly model OXPHOS system	21	2	NDUFA1,NDUFA13	19	NDUFB9,NDUFAF2,NDUFS3,TIMMDC1,NDUFAF3,NDUFA6,NDUFA3,NDUFA2,NDUFA7,NDUFS6,NDUFB10,NDUFB11,NDUFB1,NDUFB4,TMEM70,NDUFC2,NDUFAF1,NDUFS8,NDUFAF4	13.70	0.000000
B cell receptor signaling pathway	26	13	IRF4,SH3BP2,VAV2,NFATC2,RPS6KA1,GAB2,PTPN11,GAB1,CDC42,PDPK2,TEC,PIP5K1B,CD22	13	ILF2,RAF1,MAP3K7,MAP2K6,RASGRP3,CD79B,LYN,CD79A,RAC1,CD81,BLNK,BLK,MAP2K1	13.28	0.000000
miR-targeted genes in squamous cell	32	5	MIR20A,NRP1,FNDC3B,ADAR,GFPT1	27	GOLGA7,TMEM59,GALNT7,ATP6V1C1,RAB34,TPM3,BET1,PWP1,ARF4,ARFIP1,POLR2C,ANXA2,SDCBP,PPP1R7,IDH1,MOV10,ANP32B,ATP6V1F,DHX40,ACAA2,RTN4,CHMP2A,YWHAQ,RHEB,RARS,MIR21,MIR196B	34639	0.000000
Pyrimidine metabolism	24	1	POLR1A	23	NUDT2,TYMS,CTPS1,DUT,RRM2,DCTPP1,RRM1,UCK1,TK1,RRM2B,NME4,PNP,PRIM2,POLA1,POLR2K,POLR2B,POLR2C,POLR2E,POLR2H,POLR2L,POLR2I,POLD4,POLE2	15646	0.000000
DNA repair pathways, full network	26	0		26	MSH2,RFC2,RFC3,RFC4,EXO1,PCNA,POLE2,POLD4,RAD23A,CETN2,CDK7,XRCC4,PRKDC,APEX1,POLB,PARP2,SMUG1,TDG,FEN1,RAD54B,FANCI,USP1,CHEK1,RAD51C,REV3L,POLI	47423	0.000000
Oxidative phosphorylation	19	3	ATP5G3,ATP5I,ND6	16	ATP5D,NDUFB4,ATP5G1,NDUFS6,NDUFA9,ATP5F1,ATP5L,NDUFB10,NDUFS3,NDUFA2,NDUFS8,ATP5B,ATP5J,ATP6AP2,ATP5J2,NDUFA11	47058	0.000000
Amino acid metabolism	22	1	ACSS1	21	MDH1,EPRS,DLD,ACADM,IARS,ADH5,LDHA,SDHA,FARSB,ASNS,ALDH7A1,SUCLG1,HMGCL,MUT,IDH1,GLUL,RARS,GOT1,SRM,HADH,ARG2	13789	0.000000
Collagen biosynthesis and modifying enzymes	1	1	SERPINH1	0		44470	0.000000
Nuclear receptors meta-pathway	41	13	SLC26A2,SRGN,TNFAIP3,SP1,ABCB4,IL1B,PDE4B,ABCC5,AKAP13,SLC2A3,JUND,CPT1A,SLC39A7	28	HSP90AA1,KTN1,CBR1,TXN,NFE2L2,MGST3,FTL,GSTA4,MT1IP,SULT1A1,FTH1,NQO1,PRDX6,ALOX5AP,BIRC2,GSTP1,AIP,SCP2,PLTP,ACADM,CDK4,CDK1,GSTM5,GSTM1,GSTM2,GSTM4,SLC5A3,SLC39A4	15220	0.000000
Brain-derived neurotrophic factor (BDNF) signaling pathway	26	8	PTPN11,SORT1,RPS6KB1,VAV2,CDC42,RPS6KA3,RPS6KA1,MAP3K2	18	CYFIP1,NCK2,RANBP9,RAC1,MAP2K1,EIF4EBP1,CAMK4,RAF1,CDK5,EIF4E,CASP3,YBX1,DPYSL2,RHOG,CFL1,MAP2K5,EIF2S1,EIF2S2	11202	0.000000
DNA replication	14	0		14	RFC4,PCNA,GMNN,UBC,POLD4,MCM6,RFC5,CDK2,RFC3,MCM10,POLE2,UBA52,CDC6,RFC2	44994	0.000000
Fragile X syndrome	23	12	DUSP3,EIF4G1,ALDH5A1,CPT1A,PTPN11,AGO2,GAB1,DICER1,DAG1,SYNGAP1,RPS6KB1,KRAS	11	CAMK4,AP2M1,CLTA,PPP1CA,CYFIP1,MAP2K1,RAF1,EIF4E,RHEB,ABCD3,EIF4A1	35278	0.000000
Translation factors	15	2	ETF1,EIF4G1	13	EIF2B2,EIF2B4,EIF2AK3,EIF4A1,EIF4E,PAIP1,EIF4EBP1,EEF1D,PABPC1,EIF2S1,EIF2S2,EIF5B,EIF1AX	33086	0.000000
Metabolic Epilepsies	20	4	SLC25A15,PFKL,HK2,SLC2A3	16	SPCS1,ALDH7A1,DLD,ECHS1,HADH,DLAT,MPC2,MPC1,FBP1,ALDOA,GOT1,PGK1,MDH1,LDHA,PHGDH,MOCS2	29068	0.000000
TNF-alpha signaling pathway	20	4	KRAS,MADD,TNFRSF1B,TNFAIP3	16	MAP2K6,GLUL,DIABLO,RAF1,HSP90AA1,BID,TANK,TXN,RAC1,BIRC2,CASP7,CASP3,RFK,MAP3K7,NSMAF,SKP1	29068	0.000000
Zinc homeostasis	13	1	SLC39A7	12	SLC39A4,MT1A,MT1B,MT1E,MT1F,MT1G,MT1H,MT1M,MT1X,MT2A,MT1L,SLC30A9	27607	0.000000
JAK/STAT pathway	21	9	PTPN1,RPS6KA1,VAV2,RPS6KB1,PTPN11,IL1B,TEC,CDC42,SP1	12	MAP2K1,PRL,RAC1,EIF4E,PAK1,PPIA,EIF4EBP1,RAF1,SOCS2,ISOC1,ROCK1,AURKA	15919	0.000000
miRNA regulation of DNA damage response	20	3	MIR17,MIR330,MIR20A	17	RAD51,RB1,CDK2,GADD45A,RAD17,CHEK1,BID,CDK5,CCNE2,PRKDC,CASP3,CDK4,CYCS,RRM2B,CDK1,CDC25C,CCNB1	13728	0.000000
Copper homeostasis	15	3	SP1,STEAP3,XIAP	12	MT1A,MT1B,MT1E,MT1F,MT1G,MT1H,MT1JP,MT1L,MT1X,MT2A,CASP3,COX11	46600	0.000000
Ferroptosis	16	1	STEAP3	15	CHMP5,FDFT1,ACSL1,PHKG2,VDAC2,AKR1C3,SLC3A2,CISD1,PCBP2,FTH1,GPX4,SAT2,FTL,NCOA4,VDAC3	45115	0.000000
Smith-Magenis and Potocki-Lupski syndrome copy number variation	28	8	RAI1,LIMK1,CLOCK,IL1B,snoU13,IFT172,ETV5,FNIP1	20	LDHA,WDR41,CLTA,ARG2,PEMT,COPS3,ROCK1,RMI2,BIRC2,ATG101,RAB10,IFT74,IFT22,IFT52,CLUAP1,RANBP9,COPS6,COPS8,COPS2,COPS4	32325	0.000000
7q11.23 copy number variation syndrome	21	3	MIR590,LIMK1,HDAC6	18	SMARCA5,ATP5B,ATPAF1,ATP5D,ATF4,RFC2,RB1,TSG101,DLD,UBE2L6,PCNA,RFC5,EIF2A,CFL1,EIF2AK3,UBE2E3,VPS28,VPS37A	31229	0.000000
TCA cycle (aka Krebs or citric acid cycle)	9	0		9	SDHA,SUCLG1,IDH3G,IDH2,SDHD,SDHB,IDH3A,DLD,SUCLA2	31229	0.000000
DNA damage response	16	0		16	RB1,CDC25C,CCNB1,CHEK1,CASP3,BID,GADD45A,CYCS,CDK5,RAD51,RRM2B,CDK2,CDK4,RAD17,PRKDC,CCNE2	27942	0.000000
mRNA processing	22	6	SNRPD2,DICER1,CSTF2T,U2AF2,SNRPE,SNRPG	16	SNRPD3,DNAJC8,RNGTT,SPOP,SNRPB2,PCBP2,DDX1,SRP54,METTL3,CPSF3,CPSF1,SF3A3,NONO,SNRPB,SNRPA,DHX15	27576	0.000000
Insulin signaling	25	12	PIK3CD,PRKCH,SRF,MAP3K2,RPS6KA3,PFKL,RPS6KA1,RPS6KB1,PTPN1,CBLB,PTPN11,GAB1	13	RAC1,RHEB,XBP1,EIF4EBP1,MAP2K6,MAP3K7,STXBP3,PIK3R4,EIF4E,RAF1,MAP2K5,FLOT1,MAP2K1	24289	0.000000
Endothelin pathway	35	9	ARRB1,GAB1,ZNF136,FNDC3B,MAP3K2,IL1B,DAG1,RPS6KB1,RPS6KA3	26	YWHAQ,ABHD3,DNAJC12,ARL6IP5,RAC1,EIF5B,MYO1B,NQO1,VIM,ANXA7,MYL12B,ACTR3,DLAT,CREG1,CCNB1,CAPZB,HTATSF1,PAK1,MAP2K1,ILK,ATF1,CFL1,CTNND1,TCF4,GNAS,CDK2	21732	0.000000
Glycolysis and gluconeogenesis	13	3	PFKL,HK2,SLC2A3	10	FBP1,ALDOA,GOT1,DLD,PGK1,MDH1,LDHA,DLAT,MPC2,MPC1	16619	0.000000
O-linked glycosylation	2	2	B4GALT5,ST6GAL1	0		15523	0.000000
Integrated breast cancer pathway	25	5	KRAS,TFPI,SP1,DAG1,CDC42	20	RPP38,WEE1,BMPR2,RASGRP3,MIR21,RAC1,BLM,RAD51,CASP3,MSH2,CDK2,ATF1,RHEB,BID,PHB,AURKA,GADD45A,CDK4,CDK7,PAK1	14427	0.000000
Cholesterol metabolism with Bloch and Kandutsch-Russell pathways	13	6	DHCR24,HMGCS1,MVD,LSS,MYLIP,FADS1	7	NSDHL,SQLE,IDI1,FDFT1,GGPS1,ACSL1,ACOT2	12236	0.000000
PodNet: protein-protein interactions in the podocyte	35	15	PIK3CD,NOTCH2,CRIM1,SMURF1,ANGPT1,DICER1,NOTCH1,JUP,VASP,SP1,HIF1AN,CDC42,DAG1,NRP1,VAV2	20	TCF3,TSG101,ARPC5,RAB4B,PSENEN,IGFBP7,CFL1,ARPC2,PAK1,ACTR3,BIRC5,IGFBP2,CAPZB,ILK,CAPZA1,RAC1,ADIPOR1,CDK5,PALLD,NCK2	45114	0.000000
Prolactin signaling pathway	16	7	GAB2,VAV2,PTPN11,PTPN1,RPS6KB1,YWHAG,TEC	9	PRL,CASP3,PAK1,SOCS2,PPIA,RAC1,EIF4EBP1,RAF1,MAP2K1	34851	0.000000
Glycosaminoglycan metabolism	1	1	ABCC5	0		34121	0.000000
Mitochondrial complex IV assembly	11	2	COX6C,COX18	9	HIGD1A,COX6B1,COX16,COA3,COX6A1,COX11,COX8A,COX4I1,COX20	34121	0.000000
Metallothioneins bind metals	9	0		9	MT1B,MT1X,MT1G,MT1F,MT1A,MT1H,MT1M,MT2A,MT1E	33390	0.000000
Cytoplasmic ribosomal proteins	17	9	RPL9,RPL7,RPL27,RPL39,RPS14,RPS29,RPS6KA1,RPS6KA3,RPS6KB1	8	RPL35,RPL6,RPL15,RPL19,UBA52,RPS15,RPS17,RPS26	31199	0.000000
Gastrin signaling pathway	20	8	SP1,CDC42,RPS6KB1,CD44,PTPN11,PRKCH,KRAS,ARRB1	12	ROCK1,RAC1,MAP2K1,LAMTOR3,PAK1,TCF4,BIRC5,CASP3,RAF1,BIRC2,EIF4EBP1,ANXA2	27912	0.000000
Class A/1 (rhodopsin-like receptors)	2	1	P2RY11	1	GPR18	27181	0.000000
MAPK signaling pathway	30	16	SRF,RPS6KA3,ELK4,ARRB1,MAP3K2,PTPN7,IL1B,TAOK1,CDC42,JUND,RASGRP2,DUSP3,PPP3R1,MKNK2,KRAS,CACNB1	14	MAP3K7,STMN1,CASP3,GADD45A,MAP2K5,MAP2K1,RAC1,MAP2K6,ATF4,PPM1B,RASGRP3,STK3,RAF1,PAK1	26085	0.000000
DNA mismatch repair	9	0		9	EXO1,POLD4,MSH2,PCNA,RFC2,RFC3,RFC4,RFC5,POLE2	19146	0.000000
Cholesterol metabolism	15	7	SORT1,LDLR,DHCR24,MYLIP,HMGCS1,MVD,LSS	8	PLTP,LRPAP1,VAPA,LIPC,NSDHL,SQLE,IDI1,FDFT1	18050	0.000000
DNA IR-damage and cellular response via ATR	17	2	UPF1,SP1	15	RBBP8,MCPH1,RAD51,FANCI,MSH2,PRKDC,PCNA,USP1,BLM,RAD17,POLB,EXO1,CDC25C,RECQL,FEN1	14763	0.000000
Glycolysis and Gluconeogenesis - for workshop	11	3	PFKL,HK2,SLC2A3	8	FBP1,ALDOA,GOT1,PGK1,MDH1,LDHA,MPC2,MPC1	14397	0.000000
miR-targeted genes in leukocytes	23	3	FADS1,PDLIM5,ADAR	20	ATP6V1F,IFRD1,POLR2C,RHOG,TYMS,RAB34,CDK5RAP1,MLLT11,PPIF,RTN4,TPM3,TXN2,ANXA2,ARF4,CSRP1,GOLGA7,YWHAQ,IDH1,ACAA2,MATR3	12571	0.000000
Head and neck squamous cell carcinoma	15	6	GAB1,RICTOR,NOTCH1,KRAS,NOTCH2,ERBB2	9	FKBP1A,EIF4E,RB1,BIRC2,RHEB,CDK4,EIF4EBP1,CUL3,NFE2L2	12206	0.000000
Nucleotide metabolism	8	0		8	RRM1,OAZ1,RRM2,PRPS1,POLB,RRM2B,ADSL,SRM	11475	0.000000
Exercise-induced circadian regulation	12	2	ETV6,CLOCK	10	SF3A3,PSMA4,ZFR,SUMO1,PPP2CB,NCOA4,DNAJA1,GSTP1,VAPA,IDI1	47270	0.000001
Angiogenesis overview	14	7	DAG1,CDC42,NRP1,PTPN11,PIK3CD,VHL,ANGPT1	7	RAC1,MAP2K1,RAF1,PAK1,MAP2K6,MAP3K7,TIMP2	46905	0.000001
WikiPathways Academy: met-1-last	7	3	HMGCS1,MVD,LSS	4	NSDHL,SQLE,IDI1,FDFT1	44348	0.000001
WikiPathways Academy: met-1-last	7	3	HMGCS1,MVD,LSS	4	NSDHL,SQLE,IDI1,FDFT1	44348	0.000001
WikiPathways Academy: met-1-last	7	3	HMGCS1,MVD,LSS	4	NSDHL,SQLE,IDI1,FDFT1	44348	0.000001
DNA IR-double strand breaks and cellular response via ATM	13	1	UPF1	12	MCPH1,RAD51,EXO1,STK3,PCNA,ACTL6A,CDK5,BLM,RAD17,BID,CASP3,CDC25C	42887	0.000001
Genes related to primary cilium development (based on CRISPR)	17	2	TXNDC15,IFT172	15	BBS2,IFT52,CLUAP1,IFT74,CEP192,DYNLL1,DYNC2H1,BBS4,LZTFL1,KIFAP3,TRAPPC11,FOPNL,PIBF1,CEP162,SASS6	45175	0.000001
Fatty acid beta-oxidation	10	1	CPT1A	9	HADHA,ACADM,HADHB,ECHS1,ACADVL,DLD,ACSL1,DECR1,LIPC	45052	0.000001
Metabolic reprogramming in pancreatic cancer	11	5	PFKL,HK2,KRAS,GFPT1,LDLR	6	MDH1,LDHA,GOT1,DLD,DLAT,PDHB	44991	0.000001
WikiPathways Academy: met-1-indirect	6	3	HMGCS1,MVD,LSS	3	SQLE,IDI1,FDFT1	6.00	0.000001
WikiPathways Academy: met-1-indirect	6	3	HMGCS1,MVD,LSS	3	SQLE,IDI1,FDFT1	6.00	0.000001
Class I MHC mediated antigen processing and presentation	2	2	TAPBP,PDIA3	0		35186	0.000001
WikiPathways Academy: wp-publish test	7	3	HMGCS1,MVD,LSS	4	NSDHL,SQLE,IDI1,FDFT1	34820	0.000001
Cholesterol biosynthesis pathway	7	3	HMGCS1,MVD,LSS	4	NSDHL,SQLE,IDI1,FDFT1	34820	0.000001
Fas ligand pathway and stress induction of heat shock proteins	11	1	LMNB1	10	FAF1,CASP7,RIPK2,PAK1,ARHGDIB,CYCS,RB1,MAP3K7,CASP3,PRKDC	33725	0.000001
Androgen receptor network in prostate cancer	18	4	SP1,PTPN11,GAB1,RICTOR	14	MIR21,HSD17B4,ATF1,BLM,CASP3,MSH2,PRKDC,CDK2,ACTL6A,MAP2K1,RAF1,PAK1,RHEB,EIF4EBP1	33359	0.000001
Target of rapamycin signaling	10	4	CDC42,RPS6KB1,ULK3,RICTOR	6	RRAGC,RAC1,RHEB,FKBP1A,IDI1,EIF4EBP1	28976	0.000002
Measles virus infection	20	6	TNFAIP3,CBLB,ADAR,MAVS,IL1B,PIK3CD	14	TLR7,OAS1,EIF2S1,EIF2AK3,BID,EIF3H,CYCS,CDK2,MAP3K7,CASP3,CDK4,CCNE2,IL2RG,FCGR2B	28611	0.000002
Circadian rhythm genes	25	8	CLOCK,PER3,AHCY,GFPT1,DYRK1A,JUND,RAI1,CPT1A	17	ADA,CDK4,TYMS,METTL3,ID3,MAGED1,EZH2,PPP1CC,SKP1,OPN3,ATF4,PRKDC,NONO,UBA52,PPP1CA,RBM4B,UBC	26054	0.000002
Spinal cord injury	18	4	CSPG4,CDC42,ZFP36,IL1B	14	APEX1,TNFSF13B,FCGR2A,CDK2,RTN4,CDK4,E2F5,RB1,GADD45A,VIM,FKBP1A,CDK1,RAC1,CASP3	25324	0.000002
Photodynamic therapy-induced HIF-1 survival signaling	10	4	PFKL,HIF1AN,SLC2A3,ANGPT1	6	LDHA,PGK1,IGFBP2,BIRC5,BNIP3L,BID	24593	0.000002
Glioblastoma signaling pathways	15	7	PIK3C2B,ERRFI1,PIK3CD,GAB1,ERBB2,KRAS,PRKCH	8	MAP2K1,RB1,MIR21,RAF1,MAP2K5,MAP2K6,CDK2,CDK4	24593	0.000002
NRF2 pathway	20	3	ABCC5,SLC2A3,SLC39A7	17	MGST3,NFE2L2,TXN,CBR1,GSTP1,PRDX6,HSP90AA1,GSTA4,NQO1,FTL,FTH1,GSTM5,GSTM1,GSTM2,GSTM4,SLC5A3,SLC39A4	21306	0.000003
G1 to S cell cycle control	13	0		13	RB1,PCNA,CDK4,CDK1,CDK2,CDK7,CREB3,CCNB1,MCM6,POLE2,WEE1,GADD45A,CCNE2	20941	0.000003
G13 signaling pathway	10	4	PIK3CD,LIMK1,CDC42,RPS6KB1	6	CYFIP1,IQGAP2,ARHGDIB,RAC1,ROCK1,CFL1	20576	0.000003
Endoderm differentiation	20	7	MBTD1,KDM4A,NOTCH1,ZNF462,ZIC5,ELK4,TOX	13	UBR5,C1QBP,LRPPRC,LEO1,CTBP2,WDHD1,PABPC1,TAF5,MAD2L2,ELP4,TCF4,EZH2,SIAH2	18019	0.000003
Base excision repair	9	0		9	APEX1,POLB,SMUG1,TDG,POLE2,POLD4,PCNA,FEN1,PARP2	16558	0.000004
8p23.1 copy number variation syndrome	12	0		12	LYN,TERF1,MTMR9,BLK,CD79A,MSRA,FDFT1,CTSB,ERI1,PINX1,CD79B,SLBP	16558	0.000004
TGF-beta signaling pathway	19	5	SP1,SMURF1,ZFYVE9,CDC42,JUND	14	E2F5,CDK1,MAP3K7,STRAP,UCHL5,TGIF1,MAP2K1,RAF1,SNW1,SKP1,RAC1,MAP2K6,SUMO1,ROCK1	14001	0.000004
Leptin signaling pathway	14	7	SP1,PTPN11,ERBB2,PTPN1,RPS6KB1,IL1B,CDC42	7	RAF1,SOCS2,EIF4E,EIF4EBP1,MAP2K1,ROCK1,RAC1	13271	0.000004
Cholesterol synthesis disorders	7	4	HMGCS1,MVD,DHCR24,LSS	3	SQLE,FDFT1,IDI1	11444	0.000005
Senescence and autophagy in cancer	17	4	LAMP1,IL1B,CD44,ATG14	13	IGFBP7,CDK4,CREG1,MAP2K1,ATG3,ATG10,RB1,GABARAP,MAP2K6,SLC39A4,RAF1,CDK2,PCNA	42856	0.000007
Mevalonate arm of cholesterol biosynthesis pathway	6	2	HMGCS1,MVD	4	FDFT1,HMGCL,IDI1,GGPS1	41395	0.000007
Axon Guidance	18	6	NRP1,PTCH1,LIMK1,CDC42,PTPN11,NFATC2	12	CFL1,CDK5,DPYSL2,RAC1,RAF1,ILK,RYK,BMPR2,NCK2,ROCK1,MYL12B,CXCR4	41395	0.000007
Chemokine signaling pathway	21	12	VAV2,CDC42,PREX1,RASGRP2,PIK3CD,PRKX,KRAS,PLCB2,TIAM2,GNB4,ARRB1,ADCY6	9	RAC1,RAF1,GNG5,LYN,PAK1,CXCR4,ROCK1,ELMO1,MAP2K1	45265	0.000008
Fluoropyrimidine activity	9	1	ABCC5	8	TK1,TDG,SMUG1,TYMS,RRM1,UCK1,GGH,RRM2	45143	0.000008
Nucleotide excision repair	10	0		10	CDK7,POLD4,POLE2,PCNA,RFC2,RFC3,RFC4,RFC5,RAD23A,CETN2	44990	0.000009
Photodynamic therapy-induced unfolded protein response	8	0		8	XBP1,NFE2L2,ATF4,EIF2A,EIF2AK3,HSP90B1,ASNS,NARS	35521	0.000011
Vasopressin-regulated water reabsorption	10	1	ADCY6	9	RAB11A,GNAS,DCTN2,CREB3,DYNC2H1,DYNLL1,DYNC1I2,DCTN6,ARHGDIB	34425	0.000012
NF1 copy number variation syndrome	17	3	EZH1,LIMK1,EED	14	SUZ12,RFC2,PCNA,RAD51,HOXA9,USP1,RFC3,RFC5,RFC4,CTD-2349P21.1,CCNE2,RBBP7,CCNA2,EXOC6	30042	0.000015
Enterocyte cholesterol metabolism	9	5	HMGCS1,MVD,LSS,DHCR24,LDLR	4	IDI1,SQLE,FDFT1,NSDHL	27851	0.000018
Thyroid stimulating hormone (TSH) signaling pathway	12	2	RPS6KB1,RPS6KA1	10	MAP2K1,RAF1,TTF2,CDK2,MAP2K6,RB1,MYL12B,GNAS,CDK4,APEX1	27120	0.000018
Integrin-mediated cell adhesion	15	6	CDC42,VAV2,ZYX,ITGA4,ITGB2,VASP	9	RAF1,RAC1,ROCK1,CAPN2,MAP2K5,MAP2K6,MAP2K1,ILK,PAK1	24198	0.000022
17p13.3 (YWHAE) copy number variation	7	1	YWHAG	6	CDK5,YWHAH,YWHAQ,DCTN2,DCTN3,DCTN6	23468	0.000023
Methionine de novo and salvage pathway	7	1	AHCY	6	MAT2B,MSRA,MSRB2,SRM,ADI1,ENOPH1	23468	0.000023
Malignant pleural mesothelioma	39	17	ASXL1,EED,MCU,CD44,SP1,LATS2,RPS6KA1,ITGA4,ITGB2,ANGPT1,FZD8,LRP6,PIK3CD,RPS6KB1,MAP3K2,MKNK2,RPS6KA3	22	SUZ12,CYCS,LGALS9,EZH2,SLC3A2,YY1,CDK4,CDK7,CDK2,RHEB,MAP2K1,MAP2K6,PAK1,CDH11,FLT3,EFNA4,STK3,RYK,CTBP2,HMGN1,MAD2L1,MDK	21641	0.000025
PI3K-Akt signaling pathway	32	8	COL6A3,IL4R,PIK3CD,ITGA4,ANGPT1,GNB4,KRAS,RPS6KB1	24	CCNE2,IL2RG,EFNA4,PRL,GNG5,RHEB,PPP2CB,PPP2R2A,PPP2R5E,PPP2R5A,PPP2R3C,HSP90AA1,HSP90B1,RAF1,MAP2K1,CREB3,ATF4,EIF4EBP1,EIF4E,RAC1,FLT3,CDK2,CDK4,G6PC3	19085	0.000030
T-cell receptor signaling pathway	14	8	CBLB,CDC42,GAB2,PTPN11,NFATC2,IL1B,TNFRSF9,IRF4	6	PAK1,RAF1,MAP2K1,MAP3K7,VIM,RIPK2	18719	0.000031
nsp1 from SARS-CoV-2 inhibits translation initiation in the host cell	6	0		6	EIF3H,EIF3I,EIF3G,EIF3E,EIF2S2,EIF2S1	18719	0.000031
TCA cycle and deficiency of pyruvate dehydrogenase complex (PDHc)	6	0		6	DLD,MDH1,IDH1,IDH3A,SDHA,DLAT	18719	0.000031
Rett syndrome causing genes	10	5	TAF1B,TBL1X,GABBR2,CHD4,SYNGAP1	5	EIF2B2,TCF4,GPS2,IMPDH2,RHOBTB2	18354	0.000031
Tumor suppressor activity of SMARCB1	8	2	PTCH1,EED	6	RB1,SUZ12,EZH2,CDK4,ACTL6A,SMARCE1	17989	0.000032
Host-pathogen interaction of human coronaviruses - MAPK signaling	9	2	RPS6KA3,RPS6KA1	7	MAP2K1,EIF4E,MAP2K6,RAF1,IFITM2,IFITM3,IFITM1	16893	0.000034
Focal adhesion: PI3K-Akt-mTOR-signaling pathway	29	10	ITGB2,IL4R,PIK3CD,ITGA4,ANGPT1,GNB4,KRAS,SLC2A3,RPS6KB1,PIK3C2B	19	PIK3R4,IL2RG,EFNA4,PRL,GNG5,RHEB,PPP2CB,PPP2R5E,PPP2R5A,PPP2R3C,HSP90AA1,HSP90B1,RAF1,MAP2K1,CREB3,ATF4,RAB10,EIF4EBP1,EIF4E	14702	0.000040
Gastric cancer network 2	8	0		8	UBE2T,FANCI,RAD17,RFC3,CACYBP,ATAD2,BRIX1,RFC4	13971	0.000042
Nucleotide-binding oligomerization domain (NOD) pathway	9	3	NDUFA13,IL1B,XIAP	6	COPS6,RIPK2,RAC1,SUGT1,PYCARD,CASP7	13606	0.000042
Mitochondrial long chain fatty acid beta-oxidation	6	1	CPT1A	5	SCP2,ACSL1,HADHA,ACADM,ACADVL	12510	0.000046
Angiopoietin-like protein 8 regulatory pathway	17	7	PIK3CD,RPS6KB1,THRA,MAP3K2,RPS6KA1,RPS6KA3,CBLB	10	RHEB,PIK3R4,RAF1,EIF4E,EIF4EBP1,FLOT1,MAP2K1,MAP3K7,MAP2K5,MAP2K6	12145	0.000047
Metapathway biotransformation Phase I and II	21	2	CYP20A1,KCNAB2	19	GSTA4,NAT1,GPX1,TPMT,GSTM4,AKR1B1,GSTM2,AKR1C3,GSTK1,GSTM5,GPX4,CYP2R1,GSTM1,SULT1A1,SULT1A4,SULT1A3,GSTP1,COMT,MGST3	11049	0.000050
Parkin-ubiquitin proteasomal system pathway	12	1	PSMC6	11	SIAH2,PSMD10,PSMC4,PSMC3,PSMC2,PSMC1,PSMD7,PSMD4,PSMD14,PSMD13,PSMD9	47209	0.000051
Apoptosis modulation and signaling	15	3	MADD,TNFRSF1B,XIAP	12	BIRC5,AIFM1,CASP3,CASP4,BLK,CYCS,BID,CASP7,PTRH2,HTRA2,DIABLO,BIRC2	46844	0.000053
Purine metabolism and related disorders	7	0		7	RRM2B,ADA,ADSL,PRPS1,DGUOK,PNP,TPMT	45383	0.000057
Hepatitis B infection	18	4	PIK3CD,NFATC2,KRAS,MAVS	14	CREB3,YWHAQ,BID,CASP3,CYCS,BIRC5,VDAC3,RAF1,MAP2K1,ATF4,PCNA,MAP3K7,MAP2K6,TLR3	41730	0.000072
Pancreatic adenocarcinoma pathway	13	5	KRAS,CDC42,PIK3CD,ERBB2,RPS6KB1	8	RAC1,PAK1,RAF1,MAP2K1,RAD51,GADD45A,CDK4,RB1	45050	0.000090
Androgen receptor signaling pathway	13	4	FKBP4,CDC42,SP1,ETV5	9	SMARCE1,PSMC3IP,SUMO1,RAC1,ROCK1,RB1,TGIF1,RNF14,NCOA4	45050	0.000090
Oncostatin M signaling pathway	11	6	JUND,KRAS,PRKCH,PTPN11,RICTOR,LDLR	5	MAP2K1,CASP3,RAF1,CDK2,CASP7	45020	0.000092
Mesodermal commitment pathway	18	8	ELK4,ZNF462,ARID5B,MBTD1,TOX,SRF,FZD8,ZIC5	10	CSRP2,BMPR2,MACF1,ELP4,TCF4,NFE2L2,UBR5,C1QBP,WDHD1,CTBP2	44989	0.000093
Focal adhesion	21	8	ZYX,ITGA4,ERBB2,CDC42,VASP,XIAP,PIK3CD,VAV2	13	CAPN2,RAC1,ILK,ROCK1,RAF1,MAP2K1,BLK,BIRC2,PAK1,PPP1CA,PPP1CC,MYL12A,MYL12B	35855	0.000105
Translation inhibitors in chronically activated PDGFRA cells	9	3	RPS6KA1,RPS6KB1,EIF4G1	6	MAP2K1,MAP2K5,MAP2K6,EIF4EBP1,EIF4E,EIF4A1	35125	0.000110
Purine metabolism	5	0		5	ADA,ADSL,PRPS1,DGUOK,PNP	32568	0.000128
2q37 copy number variation syndrome	19	5	COL6A3,CYTH1,RNA5SP122,DGKD,IL1B	14	GABARAP,MYEOV2,CXCR4,RAB27A,RRAGC,PRL,TMSB10P1,RAC1,CENPA,THAP4,COPS8,PPP1R7,ILK,SEPT2	32568	0.000129
Human cytomegalovirus infection	1	0		1	DUT	31107	0.000141
Genetic causes of porto-sinusoidal vascular disease	8	3	NOTCH1,CDC42,SP1	5	CHCHD2,SBDS,DGUOK,IBTK,RAC1	29646	0.000154
Nucleotide excision repair in xeroderma pigmentosum	10	0		10	HMGN1,POLD4,POLE2,PCNA,RFC2,RFC3,RFC4,RFC5,RAD23A,CETN2	28550	0.000164
MET in type 1 papillary renal cell carcinoma	10	5	GAB1,KRAS,PTPN11,CDC42,PIK3CD	5	RAF1,RAC1,PAK1,MAP2K1,PRCC	28550	0.000164
Mitochondrial fatty acid oxidation disorders	6	1	CPT1A	5	SCP2,HADHA,ACADM,ACSL1,ACADVL	27820	0.000174
Non-small cell lung cancer	11	3	KRAS,ERBB2,PIK3CD	8	RB1,CDK4,RAF1,MAP2K1,GADD45A,BID,CASP3,CYCS	27089	0.000180
Aryl hydrocarbon receptor pathway	9	1	KRAS	8	NQO1,HSP90AA1,AIP,NFE2L2,RAF1,MAP2K1,CDK2,RB1	27089	0.000184
Mitochondrial complex II assembly	4	0		4	SDHD,SDHAF2,SDHB,SDHA	26359	0.000192
Gene and protein expression by JAK-STAT signaling after Interleukin-12 stimulation	11	2	LMNB1,CDC42	9	HNRNPDL,TALDO1,CAPZA1,BOLA2,PPIA,CFL1,AIP,ANXA2,PSME2	23071	0.000232
Ebola virus infection in host	16	6	ITGA4,TPCN2,CDC42,VAV2,PIK3CD,HLA-DOA	10	ICAM2,CTSB,C1QBP,TSG101,RAC1,PRKRA,EIF2S1,PAK1,CLTA,HLA-DPA1	22341	0.000245
Generic transcription pathway	6	0		6	MED20,MED30,MED8,SNW1,CCNC,CDK8	20880	0.000267
Fatty acid biosynthesis	6	0		6	ECHS1,ECHDC1,ACSL1,ACAA2,DECR1,ECH1	19054	0.000301
Ciliopathies	19	3	ADCY6,NEK9,IFT172	16	PIK3R4,DDX59,PLK4,PIBF1,NEK2,ATXN10,POC1B,BBS4,TMEM138,C21orf59,BBS2,LZTFL1,CLUAP1,PDE6D,IFT52,DYNC2H1	18688	0.000309
Ras signaling	19	12	GNB4,RASGRP2,GAB1,GAB2,PTPN11,KRAS,RASA3,SYNGAP1,RGL1,RGL2,CDC42,PIK3CD	7	FLT3,GNG5,RASGRP3,RAC1,PAK1,RAF1,MAP2K1	18688	0.000309
Immunoregulatory interactions between lymphoid and non-lymphoid cells	2	1	NCR3LG1	1	SELL	18323	0.000314
Metabolic reprogramming in colon cancer	8	1	PFKL	7	PGK1,LDHA,PDHB,IDH2,SDHB,IDH3A,TALDO1	17958	0.000321
Myometrial relaxation and contraction pathways	17	8	PRKCH,IL1B,GNB4,SP1,ADCY6,ARRB1,YWHAG,PDE4B	9	ATF4,ATF1,YWHAH,IGFBP2,GNG5,PKIA,YWHAQ,CREB3,GNAS	17593	0.000334
Apoptosis-related network due to altered Notch3 in ovarian cancer	9	2	RPS6KB1,JUND	7	NET1,RIPK2,ANXA5,VIM,NQO1,BIRC5,CASP7	17227	0.000340
Vitamin D receptor pathway	19	8	LPGAT1,IRF4,TNFAIP3,ADGRE5,MYO9B,S100A4,SALL4,NFATC2	11	STAM,SLC34A2,BGLAP,SATB1,NINJ1,CD9,TIMP2,LGALS9,GADD45A,CDK2,CCNC	16497	0.000354
Alstrom syndrome	7	2	IFT172,PTCH1	5	NSFL1C,CEP192,IFT74,BLOC1S1,SNAPIN	15401	0.000379
Oxidative stress response	7	1	SP1	6	MT1X,NFE2L2,CAT,GPX1,TXN2,NQO1	15401	0.000379
Cholesterol biosynthesis pathway in hepatocytes	14	6	LSS,DHCR24,HMGCS1,MVD,FADS1,MYLIP	8	GGPS1,FDFT1,SQLE,NSDHL,IDI1,ACSL1,ACOT1,ACOT2	15036	0.000388
11p11.2 copy number variation syndrome	17	6	ITGB2,RPS29,HYOU1,NEK9,ITGA4,ATXN1	11	GSKIP,CD9,DDX39A,ANXA7,ACP1,TK1,BIRC2,RAB11A,CREB3,PFDN1,CHCHD2P9	15036	0.000388
Iron-sulfur cluster biogenesis	5	0		5	LYRM4,ISCU,GLRX5,NUBP1,NARF	15036	0.000390
Mitochondrial complex III assembly	5	1	LYRM7	4	UQCRC2,UQCRC1,BCS1L,UQCR10	15036	0.000390
Interactome of polycomb repressive complex 2 (PRC2)	5	2	EED,EZH1	3	RBBP7,EZH2,SUZ12	15036	0.000390
Extrafollicular and follicular B cell activation by SARS-CoV-2	11	3	CD22,IRF4,NEAT1	8	IFITM1,BLNK,XBP1,TMSB10,CD79A,TLR7,CXCR4,SELL	13940	0.000419
Regulation of IGF transport and uptake by IGF binding proteins	1	0		1	IGFBP2	13575	0.000430
RAF/MAP kinase cascade	3	1	PTPN7	2	PHB,PAQR3	13210	0.000433
DNA damage response (only ATM dependent)	13	6	CDC42,PIK3CD,ERBB2,KRAS,LDLR,PIK3C2B	7	RAC1,PIK3R4,CAT,PPP2R5E,MAP3K7,SCP2,MLKL	13210	0.000438
Neurodegeneration with brain iron accumulation (NBIA) subtypes pathway	8	1	ATG14	7	ATG10,RHEB,PIK3R4,WIPI1,ATG101,ATG3,FTL	12844	0.000447
Interleukin-11 signaling pathway	8	3	PTPN11,RPS6KA1,RPS6KB1	5	RAF1,ATF1,BIRC5,BGLAP,MAP2K1	12844	0.000447
Epithelial to mesenchymal transition in colorectal cancer	17	9	NOTCH1,JUP,KRAS,NOTCH2,LATS2,EED,FZD8,LRP6,PIK3CD	8	MAP2K1,RAF1,TUSC3,STRAP,MAP2K6,PAK1,SUZ12,EZH2	11749	0.000483
ErbB signaling pathway	12	6	ERBB2,GAB1,KRAS,CBLB,PIK3CD,RPS6KB1	6	MIR21,EIF4EBP1,NCK2,PAK1,RAF1,MAP2K1	11383	0.000485
Unfolded protein response	6	1	IL1B	5	NFE2L2,EIF2S1,ATF4,XBP1,BID	11383	0.000492
N-glycan biosynthesis	9	2	ST6GAL1,MGAT5	7	DAD1,ALG8,ALG6,TUSC3,DPAGT1,ALG14,DPM1	46813	0.000519
Iron metabolism disorders	5	1	STEAP3	4	FTL,CYBRD1,FTH1,BCS1L	46447	0.000534
Ethanol metabolism production of ROS by CYP2E1	4	2	SP1,MAFK	2	MAP2K1,NFE2L2	46447	0.000537
10q11.21q11.23 copy number variation syndrome	16	1	ZNF646	15	MFF,MAGED1,NUDT5,PCNA,BGLAP,CCDC167,ACAA2,MCM6,DLD,PARP2,PSMG2,SSB,VPS26A,CAPZA1,RAB11A	46447	0.000539
PPAR-alpha pathway	6	1	CPT1A	5	SCP2,PLTP,ACADM,CDK4,CDK1	44256	0.000617
Regulation of actin cytoskeleton	16	6	PIP5K1B,SSH2,LIMK1,CDC42,KRAS,PIK3CD	10	PAK1,RAC1P4,MAP2K1,RAC1P2,ARPC5,ROCK1,RAC1,PIK3R4,RAF1,CFL1	42795	0.000671
Complement system in neuronal development and plasticity	13	2	XIAP,ITGB2	11	HTRA2,DIABLO,DLGAP5,MARK1,CASP7,CYCS,BID,PLSCR1,ATP11C,SUSD4,CASP3	42430	0.000689
Sialylation	3	0		3	NANS,CMAS,SLC35A1	42430	0.000700
Serotonin receptor 4/6/7 and NR3C signaling	5	2	SRF,ELK4	3	GNAS,MAP2K1,ATF1	42064	0.000713
Estrogen metabolism	5	1	ARSD	4	COMT,SULT1A1,NQO1,GSTM1	42064	0.000713
Interactions between LOXL4 and oxidative stress pathway	5	0		5	NQO1,NFE2L2,EXOC6,ANXA5,IGFBP7	42064	0.000713
Glucocorticoid receptor pathway	10	5	PDE4B,SLC26A2,TNFAIP3,SRGN,AKAP13	5	HSP90AA1,KTN1,ALOX5AP,BIRC2,MT1IP	45263	0.000764
Kit receptor signaling pathway	9	6	RPS6KA1,RPS6KA3,GAB2,TEC,PTPN11,RPS6KB1	3	LYN,RAF1,MAP2K1	45233	0.000769
New SOTOS	10	3	NSD1,GAB1,COX6C	7	PRELID1,HIGD2A,COX6A1,COX8A,COX4I1,FAM193B,COX6B1	45172	0.000820
Breast cancer pathway	16	9	ERBB2,RPS6KB1,KRAS,PIK3CD,NOTCH1,NOTCH2,LRP6,SP1,FZD8	7	SKP1,CDK4,RAD51,RAF1,GADD45A,RB1,MAP2K1	45141	0.000831
Neuroinflammation and glutamatergic signaling	15	6	TNFRSF1B,IL4R,IL1B,CAMKK2,PLCB2,SLC2A3	9	PPP1CC,CAMK4,PHGDH,GOT1,SRR,PPP1CA,DLAT,DLD,CFL1	45080	0.000868
TYROBP causal network in microglia	9	6	ITGB2,TMEM106A,RPS6KA1,CD84,TNFRSF1B,SFT2D2	3	GPX1,LGALS9C,PYCARD	45080	0.000872
Serotonin receptor 2 and ELK-SRF/GATA4 signaling	5	3	KRAS,ELK4,SRF	2	RAF1,MAP2K1	44988	0.000935
Host-pathogen interaction of human coronaviruses - autophagy	5	0		5	PIK3R4,WIPI1,ATG10,ATG3,ATG4A	44988	0.000935
Phosphoinositides metabolism	8	5	PLCB2,PIP4K2B,PIK3CD,MTMR12,MTMR3	3	MTMR2,MTMR9,PIK3R4	44960	0.000944
IL-3 signaling pathway	8	4	CSF2RB,GAB2,PTPN11,PIK3CD	4	LYN,MAP2K1,YWHAQ,RAF1	44960	0.000944
Cytosolic DNA-sensing pathway	10	4	ADAR,IL1B,RNF125,MAVS	6	POLR2E,POLR2K,POLR2H,POLR2F,POLR2L,PYCARD	44960	0.000952
Fc epsilon receptor (FCERI) signaling	2	1	GAB2	1	LYN	44960	0.000958
Clear cell renal cell carcinoma pathways	11	3	VHL,HK2,PFKL	8	MIR21,RHEB,MDH1,ALDOA,PGK1,PHGDH,LDHA,SSPN	35462	0.001068
Apoptosis	11	2	TNFRSF1B,IRF4	9	BIRC2,DIABLO,CASP4,CASP3,BID,CYCS,CASP7,BIRC5,BNIP3L	35462	0.001068
Kisspeptin/kisspeptin receptor system in the ovary	7	5	PLCB2,PIK3CD,PRKCH,ARRB1,KRAS	2	MAP2K1,RAF1	35096	0.001095
COVID-19 structural coverage map	6	2	NRP1,UPF1	4	UBA52,PAIP1,PARP9,UBC	34366	0.001142
Gastric cancer network 1	6	1	NOTCH1	5	KIF15,AURKA,KIF20B,ACTL6A,CEP192	34366	0.001142
Chromatin organization	3	2	CLOCK,BRWD1	1	RBBP7	34001	0.001170
Glutathione metabolism	5	0		5	GPX1,GSTM2,IDH1,GPX4,GSTM1	33635	0.001203
Wnt signaling pathway	8	3	LRP6,PIP5K1B,NFATC2	5	TCF3,RYK,MAP3K7,RAC1,TCF4	33270	0.001238
Sudden infant death syndrome (SIDS) susceptibility pathways	16	4	SP1,YWHAG,CPT1A,IL1B	12	ALDOA,ACADM,HADHA,PLP1,TCF3,YBX1,YWHAQ,YWHAH,CASP3,HADHB,SLC25A4,HSP90B1	32905	0.001250
Interleukin-1 family signaling	1	0		1	MAP2K6	32905	0.001264
Oxidative damage response	7	2	TNFRSF1B,CDC42	5	PCNA,TDP2,CYCS,GADD45A,CASP3	32540	0.001280
Joubert syndrome	10	0		10	ATF4,MYO6,PIBF1,BBS4,TMEM138,PCM1,RHEB,CETN2,BBS2,PDE6D	32174	0.001305
Neddylation	2	1	UBXN7	1	BIRC5	31809	0.001342
Mitochondrial beta-oxidation	3	0		3	ECHS1,DECR1,ACAA2	31809	0.001355
exRNA mechanism of action and biogenesis	3	2	DICER1,AGO2	1	ERI1	31809	0.001355
Endoplasmic reticulum stress response in coronavirus infection	8	1	PPP1R16B	7	XBP1,ATF4,EIF2A,PPP1R14B,PPP1R7,PPP1CC,PPP1CA	31079	0.001409
Type II interferon signaling	7	4	PTPN11,IRF4,CIITA,IL1B	3	GBP1,PSMB9,OAS1	30348	0.001488
IL-5 signaling pathway	7	4	RPS6KB1,RPS6KA1,PTPN11,CSF2RB	3	LYN,RAF1,MAP2K1	30348	0.001488
Glycolysis pathway	5	2	HK2,PFKL	3	ALDOA,PGK1,LDHA	29983	0.001525
Pathways affected in adenoid cystic carcinoma	9	5	NSD1,ARID5B,MGA,ERBB2,NOTCH1	4	SMARCE1,PRKDC,MYCBP,RAF1	29618	0.001562
A network map of Macrophage-stimulating protein (MSP) signaling	13	7	RPS6KB1,RPS6KA1,RPS6KA3,HK2,IL1B,CPT1A,GAB1	6	PCNA,VIM,LDHA,BGLAP,RAF1,MAP2K1	29618	0.001562
Familial hyperlipidemia type 3	4	1	LDLR	3	VLDLR,LIPC,PLTP	28522	0.001652
WikiPathways Academy: fig-met-1-last	4	0		4	IDH2,LDHA,SUCLA2,SDHA	28522	0.001652
Initiation of transcription and translation elongation at the HIV-1 LTR	6	3	NFATC2,PPP3R1,SP1	3	SUPT4H1,NELFCD,NELFE	25965	0.001956
Thermogenesis	12	6	RPS6KA1,CPT1A,RPS6KB1,RPS6KA3,ADCY6,KRAS	6	RHEB,CREB3,ACSL1,GNAS,SMARCE1,ACTL6A	25600	0.002015
fig-met-1-last-solution	4	0		4	IDH2,LDHA,SUCLA2,SDHA	23774	0.002236
Mitochondrial immune response to SARS-CoV-2	7	1	MAVS	6	NDUFAF1,BCS1L,NDUFB9,TLR3,PHB,TLR7	23408	0.002272
Hepatitis C and hepatocellular carcinoma	9	4	VAV2,PTPN11,CD44,MIR92A1	5	RRM2,RAC1,BIRC5,CASP3,CASP7	23408	0.002293
Cohesin complex - Cornelia de Lange syndrome	6	0		6	PPP2R5A,PPP2CB,PPP2R5E,CDK1,RAD21,ESCO2	23408	0.002307
MAPK cascade	6	3	RASA3,KRAS,MAP3K2	3	MAP2K6,RAF1,MAP2K1	23408	0.002307
Glycolysis pathway D (2)	5	2	PFKL,HK2	3	ALDOA,PGK1,LDHA	23043	0.002351
Glycolysis pathway D (2)	5	2	PFKL,HK2	3	ALDOA,PGK1,LDHA	23043	0.002351
Melanoma	9	2	KRAS,PIK3CD	7	RAC1,PAK1,RAF1,MAP2K1,GADD45A,RB1,CDK4	22678	0.002384
Small cell lung cancer	11	1	PIK3CD	10	BID,GADD45A,CYCS,CASP3,CCNE2,CDK2,RB1,CDK4,SKP1,BIRC2	22678	0.002386
2q13 copy number variation syndrome	9	2	IL1B,POLR1A	7	RPL5P9,POLR2L,POLR2K,POLR2H,POLR2F,POLR2E,RAC1	21217	0.002635
Mammary gland development pathway - Pregnancy and lactation (Stage 3 of 4)	6	2	ERBB2,PTPN1	4	YY1,PRL,TPM3,EIF4E	20852	0.002702
Ectoderm differentiation	14	6	FZD8,CCDC88C,JUP,SMURF1,TBL1X,HDAC6	8	GLB1,SOCS2,ARHGAP15,CCDC130,SDCBP,HMGB2,TSC22D1,TCF3	20486	0.002784
Interferon type I signaling pathways	8	4	GAB2,RPS6KB1,PIK3CD,PTPN11	4	EIF4E,EIF4EBP1,EIF4A1,MAP2K6	19756	0.002874
RAC1/PAK1/p38/MMP2 pathway	9	2	ERBB2,KRAS	7	RAC1,PAK1,STMN1,RAD51,EIF4EBP1,MSH2,CASP7	19756	0.002907
7-oxo-C and 7-beta-HC pathways	4	0		4	ACOT1,ACOT2,ACOT7,ACOT13	19391	0.002948
Biomarkers for pyrimidine metabolism disorders	4	1	PUS1	3	RRM1,RRM2,RRM2B	19391	0.002948
Regulation of sister chromatid separation at the metaphase-anaphase transition	4	0		4	CDC20,MAD2L1,BUB3,RAD21	19391	0.002948
H19 action Rb-E2F1 signaling and CDK-Beta-catenin activity	4	0		4	CDK4,CDK8,CSRP2,RB1	19391	0.002948
Signaling by NOTCH1	1	1	NOTCH1	0		17930	0.003236
Chromosomal and microsatellite instability in colorectal cancer	9	1	KRAS	8	MAP2K1,BIRC5,CYCS,CASP3,MSH2,RAF1,RAC1,GADD45A	16469	0.003516
Wnt signaling pathway and pluripotency	11	5	FZD8,LRP6,LDLR,PRKCH,CD44	6	PPP2CB,CTBP2,PPP2R5E,PPP2R2A,CTNND1,MAP3K7	16469	0.003556
Hijack of ubiquitination by SARS-CoV-2	3	0		3	NAE1,UBA3,CUL2	16469	0.003561
Influenza Infection	1	0		1	HSP90AA1	15373	0.003769
Bardet-Biedl syndrome	10	2	IFT172,PTCH1	8	IFT74,BBS2,BBS4,LZTFL1,PDE6D,DYNC2H1,CLUAP1,IFT52	15008	0.003922
Cholesterol biosynthesis	5	3	HMGCS1,DHCR24,LSS	2	NSDHL,ARV1	13912	0.004139
MTOR signaling	7	3	RPS6KB1,EIF4G1,LAMTOR4	4	LAMTOR3,EIF4E,SLC38A9,LAMTOR5	13547	0.004245
Clock-controlled autophagy in bone metabolism	10	4	CLOCK,SEMA4D,EFNB2,NOTCH1	6	ATG101,DRAM2,BMPR2,ATG10,ATG4C,ATG3	12451	0.004610
Synaptic signaling pathways associated with autism spectrum disorder	7	4	PIK3CD,SYNGAP1,KRAS,RPS6KB1	3	EIF4EBP1,RHEB,CAMK4	11720	0.004760
Modulators of TCR signaling and T cell activation	8	4	CBLB,TNFAIP3,ZFP36L1,AGO1	4	TMEM222,TCEB2,PCBP2,NDUFB10	11720	0.004827
Intracellular trafficking proteins involved in CMT neuropathy	5	1	MFN2	4	RAB11A,PMP22,MTMR2,RAB4B	11355	0.004906
Intraflagellar transport proteins binding to dynein	5	0		5	IFT22,DYNLRB1,DYNC2H1,DYNLL1,DYNC1I2	11355	0.004906
Deubiquitination	7	1	TNFAIP3	6	UCHL5,PSMD14,STAM,SIAH2,STAMBP,CDK1	10990	0.005015
Direct reversal repair	2	0		2	ALKBH2,ALKBH3	47150	0.005168
Methylation pathways	3	0		3	TPMT,MAT2B,COMT	47150	0.005174
Cytosine methylation	3	0		3	IDH1,TDG,IDH2	47150	0.005174
Signaling by FGFR2	1	1	PTPN11	0		46054	0.005483
TCR signaling	1	0		1	RIPK2	45689	0.005648
Sphingolipid metabolism in senescence	5	0		5	CDK4,RB1,CDK2,ASAH1,GLB1	45323	0.005768
Sulfation biotransformation reaction	4	0		4	SULT1A1,PAPSS1,SULT1A4,SULT1A3	44593	0.005975
Cori cycle	4	0		4	LDHA,ALDOA,PGK1,TALDO1	44593	0.005975
Bladder cancer	6	2	ERBB2,KRAS	4	RB1,CDK4,RAF1,MAP2K1	44228	0.006225
AGE/RAGE pathway	8	2	CDC42,SP1	6	RAC1,CASP3,ROCK1,MAP2K1,RAF1,CYCS	43497	0.006410
22q11.2 copy number variation syndrome	14	4	RANGAP1,TNPO1,SRF,CDC42	10	NPRL3,CUL3,RTN4,RAF1,RANBP1,ASF1A,MRPL40,USP41,COMT,BCRP7	42767	0.006812
ATM signaling pathway	6	0		6	GADD45A,CDC25C,CDK1,RAD51,CDK2,BID	42036	0.007037
Calcium regulation in cardiac cells	14	7	CACNB1,STIM2,GNB4,PRKCH,ARRB1,YWHAG,ADCY6	7	CAMK4,YWHAH,PKIA,FKBP1A,GNG5,YWHAQ,GNAS	42036	0.007071
Transcriptional regulation by RUNX1	2	1	SOCS4	1	BLK	42036	0.007083
Signaling by the B Cell Receptor (BCR)	2	1	CD22	1	MAP3K7	42036	0.007083
TCA cycle in senescence	3	1	PDP2	2	MDH1,GOT1	41671	0.007162
Leptin and adiponectin	3	2	ADIPOR2,CPT1A	1	ADIPOR1	41671	0.007162
Trans-sulfuration pathway	3	1	AHCY	2	MAT2B,GOT1	41671	0.007162
PPAR signaling pathway	8	2	CPT1A,FABP5	6	ACADM,SLC27A2,PLTP,ACSL1,SCP2,ILK	45262	0.007665
Acute viral myocarditis	10	2	ITGB2,EIF4G1	8	ILK,CASP7,TLR3,CYCS,PYCARD,CXCR4,CASP3,PABPC1	45232	0.007791
Cell migration and invasion through p75NTR	5	1	EFNB2	4	EFNA4,RAC1,PAK1,CDH11	45232	0.007803
IL-2 signaling pathway	6	3	GAB2,PTPN11,RPS6KB1	3	IL2RG,RAF1,MAP2K1	45201	0.007923
PTEN Regulation	1	1	SALL4	0		45201	0.007959
RANKL/RANK signaling pathway	7	2	GAB2,CDC42	5	RAC1,MAP2K1,LYN,MAP2K6,MAP3K7	45171	0.008065
p53 transcriptional gene network	10	2	NOTCH1,DRAM1	8	CDK2,PCNA,AURKA,CDC25C,GADD45A,MSH2,RRM2B,GPX1	45140	0.008357
Acute myeloid leukemia	8	4	KRAS,PIK3CD,RPS6KB1,JUP	4	RAF1,MAP2K1,EIF4EBP1,CCNA2	45140	0.008357
Hypertrophy model	4	1	JUND	3	EIF4EBP1,EIF4E,IFRD1	45048	0.008848
Lung pathology of COVID-19	4	2	MAVS,IL1B	2	TLR7,TLR3	45048	0.008848
Hereditary leiomyomatosis and renal cell carcinoma pathway	4	0		4	NFE2L2,LDHA,PDHB,CUL3	45048	0.008848
Apoptosis modulation by HSP70	4	0		4	CASP3,CYCS,BID,CASP7	45048	0.008848
Glycogen synthesis and degradation	6	0		6	PPP2CB,PHKG2,PPP2R5E,PPP2R5A,PHKA2,PPP2R2A	45048	0.008886
IL6 signaling pathway	6	3	GAB1,RPS6KB1,PTPN11	3	MAP2K1,RAC1,MAP3K7	45048	0.008886
Statin inhibition of cholesterol production	5	1	LDLR	4	PLTP,SQLE,LIPC,FDFT1	45048	0.008986
Ethanol effects on histone modifications	5	2	AHCY,HDAC6	3	ELP3,TYMS,HAT1	45048	0.008986
TROP2 regulatory signaling	8	1	NOTCH1	7	MDK,CASP3,RAC1,RB1,VIM,CDK4,CDK2	45018	0.009095
EGFR tyrosine kinase inhibitor resistance	9	5	KRAS,ERBB2,GAB1,RPS6KB1,PIK3CD	4	EIF4E,EIF4EBP1,MAP2K1,RAF1	44959	0.009539
Arsenic metabolism and reactive oxygen species generation	3	0		3	SDHA,COA3,CAT	44959	0.009542
Pathogenic Escherichia coli infection	8	2	ARHGEF2,CDC42	6	ARPC5,ROCK1,ARPC1A,ARPC2,NCK2,YWHAQ	44928	0.009881
Neural crest cell migration in cancer	6	2	PIK3CD,SORT1	4	CDH11,PIK3R4,RAC1,PAK1	2.00	0.009930
WikiPathways Tutorial: demo_step3	2	0		2	FDFT1,SQLE	2.00	0.010047
Male infertility	13	4	CLOCK,ETV5,CCNT1,AGO2	9	CAT,GPX1,NFE2L2,NQO1,PEMT,XRCC4,POLB,CTCFL,TRIP13	35796	0.010455
Imatinib and chronic myeloid leukemia	4	2	SPRED2,GAB2	2	SKP2,GADD45A	35796	0.010571
Parkinson's disease pathway	8	1	MIR18A	7	EPRS,HTRA2,CYCS,UBE2L6,CCNE2,CASP7,CASP3	35431	0.010717
DDR1-mediated signaling	8	3	IL1B,SP1,PTPN11	5	CDK1,CD9,NCK2,SEC61B,VIM	35431	0.010722
Integrated lung cancer pathway	7	1	ERBB2	6	CASP3,RAC1,MIR21,CASP7,RAF1,PAK1	35065	0.011059
Degradation of the extracellular matrix	1	1	CD44	0		34700	0.011348
Sterol regulatory element-binding proteins (SREBP) signaling	8	4	SP1,LSS,MVD,LDLR	4	CDK8,INSIG2,YY1,SQLE	34335	0.011603
Prostaglandin synthesis and regulation	6	0		6	ANXA5,PRL,TBXAS1,ANXA2,AKR1C3,CBR1	33239	0.012275
Envelope proteins and their potential roles in EDMD physiopathology	6	3	ADCY6,SRF,KRAS	3	MAP2K1,BANF1,LEMD3	33239	0.012275
mRNA vaccine activation of dendritic cell and induction of IFN-1	3	1	MAVS	2	TLR3,TLR7	33239	0.012328
Glycolysis in senescence	3	0		3	RB1,LDHA,PGK1	33239	0.012328
RalA downstream regulated genes	3	2	CDC42,KRAS	1	RAC1	33239	0.012328
Novel intracellular components of RIG-I-like receptor pathway	7	2	MAVS,RNF125	5	TANK,AZI2,PIN1,MAP3K7,SNW1	32509	0.012813
CAMKK2 pathway	11	5	FIS1,NFATC2,HK2,RPS6KB1,CAMKK2	6	ASNS,CAMK4,SELL,EIF4EBP1,RAC1,SPIRE1	32143	0.013267
p38 MAPK signaling pathway	5	1	CDC42	4	MAP2K6,RAC1,MAP3K7,HMGN1	32143	0.013267
Hepatocyte growth factor receptor signaling	5	2	PTPN11,GAB1	3	PAK1,RAF1,MAP2K1	32143	0.013267
Network map of SARS-CoV-2 signaling pathway	40	8	NEK9,UPF1,MDN1,MAVS,IL1B,RPS6KB1,STEAP3,CTSZ	32	SIGMAR1,ERLEC1,TLE1,GTF2F2,MOV10,SRP72,SRP54,GGH,RTN4,PITRM1,PMPCB,CASP3,BID,TANK,IFI6,IFITM1,IFITM3,TAX1BP1,RHEB,EIF4E,EIF4EBP1,CAMK4,WDR74,BIRC5,C1QBP,CTSB,RAC1,CDK1,RRM2,IGLC2,IGLL1,CCNB1	31778	0.013596
Notch signaling pathway	7	3	NOTCH1,NOTCH2,SPEN	4	PSENEN,SNW1,SKP1,TLE1	31413	0.013962
Photodynamic therapy-induced NFE2L2 (NRF2) survival signaling	4	0		4	GSTP1,NFE2L2,NQO2,NQO1	30317	0.014632
Prion disease pathway	5	2	PDIA3,IRF4	3	HSP90B1,RAD21,CASP3	30317	0.014953
Trans-sulfuration pathway	6	1	AHCY	5	GOT1,MAT2B,MDH1,LDHA,DLD	29952	0.014984
Aryl hydrocarbon receptor pathway	6	2	IL1B,JUND	4	HSP90AA1,AIP,NQO1,NFE2L2	29952	0.014984
Thymic stromal lymphopoietin (TSLP) signaling pathway	6	3	PTPN11,TEC,GAB2	3	MAP2K1,EIF4EBP1,LYN	29952	0.014984
Dopamine metabolism	3	0		3	NQO1,PPP2CB,COMT	29587	0.015531
Homologous recombination	3	0		3	RAD51,POLD4,RAD54B	29587	0.015531
TCF dependent signaling in response to WNT	5	3	PIP5K1B,CCDC88C,XIAP	2	LEO1,RYK	29221	0.015812
Disorders in ketone body synthesis	2	0		2	HMGCL,OXCT1	28856	0.016279
Endometrial cancer	7	3	KRAS,PIK3CD,ERBB2	4	RAF1,MAP2K1,ILK,GADD45A	28491	0.016477
Post-translational modification: synthesis of GPI-anchored proteins	1	1	GPLD1	0		28491	0.016649
Sphingolipid metabolism	1	0		1	ASAH1	28491	0.016748
Osteoblast differentiation and related diseases	11	8	LRP6,NOTCH1,PTCH1,NOTCH2,FZD8,PRKCH,PIK3CD,PIK3C2B	3	BMPR2,PRKDC,PIK3R4	27760	0.017472
Hippo-Merlin signaling dysregulation	11	5	ITGA4,ITGB2,LATS2,CD44,KRAS	6	CDH11,STK3,FLT3,PAK1,PPP1CA,PPP1CC	27395	0.017666
Genotoxicity pathway	7	3	RBM12B,AEN,CBLB	4	USP41,GADD45A,RRM2B,TRIM22	27395	0.017848
Photodynamic therapy-induced AP-1 survival signaling	6	0		6	HSP90AA1,MAP2K6,CCNA2,RB1,BID,NFE2L2	27030	0.018081
Burn wound healing	11	4	SERPINH1,IL1B,TNFAIP3,NOTCH2	7	TPM3,VIM,CXCR4,TIMP2,TLR3,TLR7,CASP3	26299	0.018876
Omega-9 fatty acid synthesis	3	1	FADS1	2	ACSL1,ACOT2	26299	0.019157
Omega-3 / omega-6 fatty acid synthesis	3	1	FADS1	2	ACSL1,ACOT2	26299	0.019157
Eicosanoid synthesis	4	0		4	ALOX5AP,TBXAS1,LTA4H,PNPLA8	25934	0.019561
Interleukin-4 and Interleukin-13 signaling	3	1	IL4R	2	IL2RG,HSP90B1	24838	0.020686
Amyotrophic lateral sclerosis (ALS)	5	0		5	CAT,RAC1,GPX1,CASP3,BID	24838	0.020855
Effect of progerin on genes involved in Hutchinson-Gilford progeria syndrome	4	1	CHD4	3	MBD2,RBBP7,RB1	23743	0.022365
Histone modifications	7	4	EZH1,NSD1,PRDM2,EED	3	EZH2,SMYD2,SMYD3	23743	0.022436
AXL signaling pathway	16	6	SP1,CPT1A,IL1B,RPS6KB1,PTPN11,KRAS	10	ANXA2,CDK4,LYN,BIRC5,CHEK1,VIM,CASP3,MAP2K1,PAK1,ELMO1	23743	0.022557
Hippo signaling regulation pathways	9	4	PRKCH,PLCB2,CDC42,LATS2	5	CDH11,GNAS,STK3,FLT3,RAC1	23743	0.022557
MAPK6/MAPK4 signaling	1	0		1	2007-09-01	23377	0.023056
Neural crest cell migration during development	5	1	PIK3CD	4	CDH11,PIK3R4,RAC1,PAK1	23377	0.023116
Familial hyperlipidemia type 5	3	1	LDLR	2	LIPC,PLTP	23012	0.023209
ERK pathway in Huntington's disease	3	0		3	CASP7,CASP3,RAF1	23012	0.023209
Demo_complete	2	0		2	FDFT1,SQLE	22647	0.023740
Pilocytic astrocytoma	2	1	PTPN11	1	RAF1	22647	0.023740
Orexin receptor pathway	24	11	TOX,ARRB1,VHL,PTPN11,CAMKK2,RPS6KB1,RPS6KA1,LDLR,LUZP1,SRF,IL1B	13	NSMAF,MAP2K1,GNAS,BGLAP,CASP7,CASP3,LDHA,PDHB,RRAGC,EIF4EBP1,NFE2L2,OPN3,ID3	21916	0.024986
NAD metabolism in oncogene-induced senescence and mitochondrial dysfunction-associated senescence	4	1	IL1B	3	GOT1,SIRT2,MDH1	21916	0.025401
Follicle stimulating hormone (FSH) signaling pathway	4	1	RPS6KB1	3	RAF1,EIF4EBP1,RHEB	21916	0.025401
Microglia pathogen phagocytosis pathway	5	3	ITGB2,VAV2,PIK3CD	2	LYN,RAC1	21551	0.025529
Beta-catenin independent WNT signaling	2	0		2	MAP3K7,RYK	20821	0.026850
Cell cycle checkpoints	6	0		6	WEE1,BUB3,CDC20,MAD2L1,CDC25C,CHEK1	20821	0.027026
TAR	6	0		6	GPR89A,SUMO1,CXCR4,FLT3,TXN,PEX11B	20455	0.027669
Netrin-UNC5B signaling pathway	6	1	PTPN11	5	PPP1CA,RAC1,RAF1,MAP2K1,CASP3	20455	0.027669
IL-1 signaling pathway	6	3	MAP3K2,PTPN11,IL1B	3	MAP2K1,MAP2K6,MAP3K7	20455	0.027669
ID signaling pathway	3	0		3	RB1,ID3,CDK2	20455	0.027688
Familial hyperlipidemia type 2	3	1	LDLR	2	LIPC,PLTP	20455	0.027688
Tryptophan metabolism	5	0		5	DLD,CAT,AFMID,ECHS1,HADH	20090	0.028097
Activation of gene expression by SREBF (SREBP)	8	4	HMGCS1,SP1,MVD,LSS	4	GGPS1,IDI1,FDFT1,SQLE	19725	0.028527
Progeria-associated lipodystrophy	4	1	LMNB1	3	RECQL,BANF1,FNTA	19725	0.028673
GPCRs, class A rhodopsin-like	4	1	P2RY11	3	OPN3,GPR18,CXCR4	19725	0.029101
Hedgehog signaling pathway	5	3	ARRB1,PTCH1,SMURF1	2	SPOP,CUL3	18629	0.030823
Wnt signaling	10	6	PPP3R1,FZD8,LRP6,PLCB2,NFATC2,PRICKLE2	4	RAC1,RYK,MAP3K7,CTBP2	18264	0.031661
Embryonic stem cell pluripotency pathways	10	5	PIK3CD,FZD8,PTPN11,GAB1,LRP6	5	MAP2K1,BMPR2,RAF1,MAP2K5,MAP2K6	18264	0.031661
Proximal tubule transport	6	0		6	ATP6V0E1,SLC3A2,ATP6V1G1,ATP6V1F,ATP6V1C1,ATP6V1E1	17899	0.032293
Arylamine metabolism	2	0		2	NAT1,SULT1A1	17899	0.032318
Cholesterol biosynthesis with skeletal dysplasias	2	1	DHCR24	1	NSDHL	17899	0.032318
Mevalonate pathway	2	2	MVD,HMGCS1	0		17899	0.032318
mRNA, protein, and metabolite inducation pathway by cyclosporin A	2	0		2	SLC3A2,ATF4	17899	0.032318
Protein repair	2	0		2	TXN,MSRA	17899	0.032318
Riboflavin and CoQ disorders	4	0		4	ETFDH,ETFA,ETFB,PHB	17899	0.032591
Pyrimidine metabolism and related diseases	3	0		3	RRM1,RRM2,RRM2B	17899	0.032591
Hedgehog 'off' state	1	1	PTCH1	0		17899	0.032592
Cardiac conduction	1	0		1	RANGRF	17899	0.032700
Signaling by FGFR1	1	1	PTPN11	0		17533	0.033267
Deregulated CDK5 triggers multiple neurodegenerative pathways in Alzheimer's disease models	5	2	LMNB1,GOLGA2	3	CDK5,PRDX2,CDC25C	17168	0.033710
TNF-related weak inducer of apoptosis (TWEAK) signaling pathway	5	0		5	RAC1,BIRC2,MAP3K7,CASP3,CASP7	17168	0.033710
Selenium micronutrient network	8	3	PRDX5,LDLR,IL1B	5	RFK,PRDX4,PRDX3,PRDX2,FLAD1	17168	0.034064
GPR143 in melanocytes and retinal pigment epithelium cells	4	3	GNA15,ARRB1,PLCB2	1	GNAS	16072	0.035935
Autophagy	4	1	ATG14	3	PIK3R4,ATG3,ATG101	16072	0.035935
Signaling by VEGF	2	1	NRP1	1	HSP90AA1	15707	0.036939
Warburg effect modulated by deubiquitinating enzymes and their substrates	6	3	HK2,VHL,U2AF2	3	PGK1,LDHA,FBP1	15342	0.037914
Familial hyperlipidemia type 1	3	1	LDLR	2	LIPC,PLTP	15342	0.037914
Genes associated with the development of rheumatoid arthritis	3	2	PHF19,CIITA	1	BLK	15342	0.037914
Inhibition of exosome biogenesis and secretion by Manumycin A in CRPC cells	3	1	KRAS	2	RAB27A,RAF1	15342	0.037914
Processing of Capped Intron-Containing Pre-mRNA	22	2	U2AF2,POLDIP3	20	SNRNP27,CWC27,SNW1,PPWD1,SRSF11,PRCC,CRNKL1,EIF4E,WBP4,DNAJC8,UPF3B,CWC22,HNRNPC,YBX1,SRSF2,SRSF3,PRPF38A,CCAR1,PCBP2,SYF2	14977	0.038687
SARS-CoV-2 mitochondrial chronic oxidative stress and endothelial dysfunction	4	1	MAVS	3	NDUFAF2,TERF2IP,NDUFAF1	14611	0.039927
Trans-sulfuration, one-carbon metabolism and related pathways	4	1	AHCY	3	PHGDH,MAT2B,TYMS	14611	0.039927
test pathway	2	1	SPTLC2	1	ASAH1	13881	0.041903
Biosynthesis and turnover of 1-deoxy-sphingoid bases	2	1	SPTLC2	1	ASAH1	13881	0.041903
Peroxiredoxin 2 induced ovarian failure	2	0		2	CASP3,PARP2	13881	0.041903
Ketogenesis and ketolysis	2	0		2	OXCT1,CAT	13881	0.041903
Serine metabolism	2	0		2	PHGDH,TYMS	13881	0.041903
Cholesterol biosynthesis, regulation and transport	3	1	LSS	2	FDFT1,SQLE	13881	0.041903
CYP2E1 activation leading to neurodegeneration	2	0		2	NFE2L2,EIF2AK3	13881	0.041903
Krebs cycle disorders	2	0		2	SUCLA2,SUCLG1	13881	0.041903
WikiPathways Academy: met-1-second	1	1	HMGCS1	0		13881	0.042105
Deadenylation-dependent mRNA decay	6	1	EIF4G1	5	EIF4E,PAIP1,PABPC1,DCPS,NT5C3B	13516	0.042976
Regucalcin in proximal tubule epithelial kidney cells	5	2	PPP3R1,MCU	3	CASP3,MAP2K1,RAF1	13150	0.043348
CKAP4 signaling pathway map	10	2	CD44,NOTCH1	8	FBXO3,VIM,CASP3,CASP4,BIRC5,MAP2K1,CCNB1,CDK1	13150	0.043385
Fatty Acids and Lipoproteins Transport in Hepatocytes	8	4	SORT1,MYLIP,LDLR,FABP5	4	LRPAP1,VAPA,ACSL1,SLC27A2	13150	0.043651
Cholestasis	3	3	TJP2,ABCB4,LDLR	0		13150	0.043651
Pathways of nucleic acid metabolism and innate immune sensing	3	2	ADAR,MAVS	1	OAS1	13150	0.043651
Interconversion of nucleotide di- and triphosphates	4	0		4	TXN,AK6,GUK1,GLRX	12785	0.044161
Signaling by FGFR3	1	1	PTPN11	0		12055	0.046565
Clathrin-mediated endocytosis	1	0		1	REPS1	12055	0.046719
Heart development	5	4	PTPN11,NOTCH1,SRF,NFATC2	1	BMPR2	12055	0.046892
RHO GTPases activate formins	2	2	EVL,SRF	0		12055	0.046946
Response to elevated platelet cytosolic Ca ions	1	0		1	STXBP3	12055	0.047246
Serotonin HTR1 group and FOS pathway	4	2	SRF,ELK4	2	MAP2K6,MAP2K1	11324	0.048637
16p11.2 distal deletion syndrome	4	2	VAV2,NFATC2	2	CD81,IFITM1	11324	0.048637
16p11.2 proximal deletion syndrome	4	2	VAV2,NFATC2	2	CD81,IFITM1	11324	0.048637
Disruption of postsynaptic signaling by CNV	4	3	NLGN4X,SYNGAP1,YWHAG	1	CYFIP1	11324	0.048637
Type I interferon induction and signaling during SARS-CoV-2 infection	4	1	MAVS	3	TLR3,OAS1,TLR7	11324	0.048637
Type I collagen synthesis in the context of osteogenesis imperfecta	4	2	LRP6,SERPINH1	2	P3H1,MIA3	11324	0.048637
BDNF-TrkB signaling	4	3	GAB1,GAB2,KRAS	1	RHEB	11324	0.048637
Alpha 6 beta 4 signaling pathway	4	2	GAB1,PTPN11	2	EIF4EBP1,RAC1	11324	0.048637
DYRK1A involvement regarding cell proliferation in brain development	6	2	LATS2,NOTCH1	4	PSENEN,CASP3,GMNN,E2F5	11324	0.049057
Autophagy in pancreatic ductal adenocarcinoma	3	1	KRAS	2	NFE2L2,VMP1	10959	0.049792
Ether lipid biosynthesis	3	1	LPIN2	2	GNPAT,PEX1	10959	0.049792
Disorders of bile acid synthesis and biliary transport	3	1	ABCB4	2	SCP2,HSD17B4	10959	0.049792
Hematopoietic stem cell gene regulation by GABP alpha/beta complex	3	2	ETV6,ZFX	1	FLT3	10959	0.049792
Overlap between signal transduction pathways contributing to LMNA laminopathies	6	3	NOTCH1,AGO2,DICER1	3	TLE1,RB1,CDK4	46753	0.052285
Heme biosynthesis	2	0		2	UROS,UROD	46753	0.052397
Hemesynthesis defects and porphyrias	2	0		2	UROS,UROD	46753	0.052397
Glycine metabolism, including IMDs	3	0		3	GLRX5,BOLA3,ISCU	46753	0.052397
Nanomaterial-induced inflammasome activation	2	1	IL1B	1	CTSB	46753	0.052397
Tgif disruption of Shh signaling	2	1	TGIF2	1	TGIF1	46753	0.052397
JAK-STAT signaling in the regulation of Beta-cells	4	1	KRAS	3	SOCS2,PRL,CDK4	44927	0.058308
FBXL10 enhancement of MAP/ERK signaling in diffuse large B-cell lymphoma	4	1	EED	3	EZH2,SUZ12,H2AFZ	44927	0.058308
G protein signaling pathways	8	6	PRKCH,ADCY6,AKAP13,GNA15,PDE4B,KRAS	2	GNAS,GNG5	44927	0.059357
Synaptic vesicle pathway	5	1	SYT1	4	NAPA,CLTA,AP2M1,SLC25A4	43831	0.062734
Familial hyperlipidemia type 4	3	1	LDLR	2	LIPC,PLTP	43831	0.063250
NAD+ biosynthetic pathways	3	1	TNKS2	2	SIRT2,PARP2	43831	0.063250
Globo sphingolipid metabolism	3	3	ST6GALNAC6,ST6GAL1,GCNT1	0		43831	0.063250
Oxysterols derived from cholesterol	4	0		4	ACOT1,ACOT2,ACOT7,ACOT13	43831	0.063499
Linoleic acid metabolism affected by SARS-CoV-2	2	1	FADS1	1	ACOT2	43831	0.063706
Non-homologous end joining	2	0		2	PRKDC,XRCC4	43831	0.063706
Nifedipine activity	2	0		2	PCNA,MAP2K1	43831	0.063706
Corticotropin-releasing hormone signaling pathway	8	3	SP1,JUND,ARRB1	5	TCF4,HSP90AA1,GNAS,MAP2K1,CASP3	43466	0.063983
Selenoamino acid metabolism	1	1	AHCY	0		43101	0.066219
ABC-family proteins mediated transport	1	1	ABCB4	0		43101	0.066663
Formation of Fibrin Clot and the Clotting Cascade	1	1	TFPI	0		42736	0.067032
Cardiomyocyte signaling pathways converging on Titin	4	2	GUCD1,SRF	2	MAP2K1,RAF1	42370	0.068924
lncRNA in canonical Wnt signaling and colorectal cancer	8	2	FZD8,LRP6	6	TCF3,EZH2,RYK,MAP3K7,CDK8,CTBP2	42370	0.069624
Hippo-YAP signaling	3	1	LATS2	2	YWHAQ,STK3	42005	0.070543
Extracellular vesicles in the crosstalk of cardiac cells	3	1	PDLIM5	2	BIRC5,CD81	42005	0.070543
Immune response to tuberculosis	3	0		3	PSMB8,OAS1,IFITM1	42005	0.070543
Nanoparticle triggered autophagic cell death	3	0		3	VMP1,ATG10,ATG3	42005	0.070543
Resolution of Abasic Sites (AP sites)	5	0		5	POLB,APEX1,SMUG1,TDG,FEN1	41640	0.071653
Nucleotide Excision Repair	2	0		2	HMGN1,CETN2	41275	0.073828
Sleep regulation	4	2	AHCY,PER3	2	ADA,DLAT	41275	0.074579
NF-kB signalling pathways in COVID-19	2	0		2	MAP3K7,TLR7	45261	0.075742
Cellular proteostasis	2	0		2	PFDN1,PFDN6	45261	0.075742
Degradation pathway of sphingolipids, including diseases	2	0		2	HEXB,GLB1	45261	0.075742
Cell surface interactions at the vascular wall	6	4	CD58,PTPN11,ANGPT1,CD84	2	PPIA,JAM2	45231	0.077417
Triacylglyceride synthesis	3	0		3	GNPAT,AGPAT5,LIPC	45231	0.078194
Toll-like receptor signaling pathway	8	2	IL1B,PIK3CD	6	TLR7,MAP3K7,MAP2K1,RAC1,TLR3,MAP2K6	45170	0.081231
Lac-Phe pathway	1	1	ABCC5	0		45139	0.082438
Mevalonate arm of cholesterol biosynthesis pathway with inhibitors	5	2	HMGCS1,MVD	3	FDFT1,IDI1,GGPS1	45139	0.082438
WikiPathways Academy: draw-complex	1	0		1	SUCLG1	45139	0.082438
Evolocumab mechanism to reduce LDL cholesterol	1	1	LDLR	0		45139	0.082438
Hypoxia-mediated EMT and stemness	1	1	DICER1	0		45139	0.082438
PCSK9-mediated LDL receptor degradation	1	1	LDLR	0		45139	0.082438
MTHFR deficiency	3	0		3	CASP3,PEMT,COMT	45078	0.086190
S1P receptor signal transduction	3	2	PLCB2,PIK3C2B	1	ASAH1	45078	0.086190
PDGF pathway	4	2	SRF,CDC42	2	RAF1,PAK1	45078	0.086564
Methionine metabolism leading to sulfur amino acids and related disorders	2	1	AHCY	1	MAT2B	45047	0.088425
Bone morphogenic protein signaling and regulation	2	1	SMURF1	1	BMPR2	45047	0.088425
Alanine and aspartate metabolism	2	0		2	DARS,GOT1	45047	0.088425
C-type lectin receptors	4	0		4	UBA3,RAF1,ICAM2,PYCARD	45047	0.089406
IL-4 signaling pathway	5	4	PTPN11,RPS6KB1,IL4R,PIK3CD	1	IL2RG	45017	0.091448
RNA Polymerase I Transcription	8	2	TAF1B,POLR1A	6	TAF1D,POLR2H,POLR2L,POLR2E,POLR2F,POLR2K	44986	0.092449
Common pathways underlying drug addiction	4	0		4	CAMK4,PPP1CA,PPP1CC,RAF1	44986	0.092885
Cytosolic sensors of pathogen-associated DNA	1	0		1	PRKDC	44986	0.093947
Protein methylation	3	0		3	N6AMT2,CAMKMT,ETFB	44958	0.094515
3q29 copy number variation syndrome	7	2	PIGM,UBXN7	5	MCRS1,CASP7,DYNC2H1,DYNLRB1,DYNLL1	44958	0.095329
Senescence-Associated Secretory Phenotype (SASP)	1	0		1	IGFBP7	44958	0.096258
Interferon gamma signaling	3	1	CIITA	2	SUMO1,MT2A	44927	0.097207
Protein folding	2	0		2	TBCB,TBCE	44927	0.097457
Costimulation by the CD28 family	1	1	PTPN11	0		44927	0.098039
Splicing factor NOVA regulated synaptic proteins	4	1	GABBR2	3	EPB41L2,SNW1,TERF2IP	1.00	0.099418
Disorders of galactose metabolism	2	0		2	GYG1,AKR1B1	0.99	0.101679
Spina bifida	2	1	AHCY	1	MAT2B	0.99	0.101679
Mitochondrial fatty acid synthesis and respiration	2	2	FIS1,MFN2	0		0.99	0.101679
Valproic acid pathway	2	0		2	HADHB,HADHA	0.99	0.101679
Uptake and function of diphtheria toxin	2	0		2	CD9,HSP90AA1	0.99	0.101679
Mammary gland development pathway - Puberty (Stage 2 of 4)	2	1	ERBB2	1	VIM	0.99	0.101679
Estrogen metabolism	3	0		3	COMT,HSD17B4,AKR1C3	0.99	0.103154
FGFR3 signaling in chondrocyte proliferation and terminal differentiation	3	1	THRA	2	RAF1,MAP2K1	0.99	0.103154
Wnt/beta-catenin signaling pathway in leukemia	3	2	LRP6,SALL4	1	FLT3	0.99	0.103154
Host-pathogen interaction of human coronaviruses - interferon induction	4	1	MAVS	3	TLR7,OAS1,MAP3K7	0.97	0.106157
Growth factors and hormones in Beta-cell proliferation	3	0		3	EZH2,CDK2,CDK4	0.95	0.112092
Growth factors and hormones in Beta-cell proliferation	3	0		3	EZH2,CDK2,CDK4	0.95	0.112092
Kleefstra syndrome	3	1	ASXL1	2	ACTL6A,DPY30	0.95	0.112092
Cell interactions of the pancreatic cancer microenvironment	3	1	NRP1	2	IFITM2,CXCR4	0.95	0.112092
Homologous recombination	3	0		3	RAD51,SSB,BLM	0.95	0.112092
Angiotensin II receptor type 1 pathway	3	3	SP1,JUND,PTPN11	0		0.95	0.112092
Genes controlling nephrogenesis	4	1	NOTCH2	3	ILK,CXCR4,NCK2	0.95	0.113097
Rubinstein-Taybi syndrome 1	2	1	CLOCK	1	PCNA	0.94	0.115432
Glucocorticoid biosynthesis	2	0		2	CBR1,AKR1C3	0.94	0.115432
Disorders of fructose metabolism	2	1	PFKL	1	FBP1	0.94	0.115432
Alpha-linolenic (omega-3) and linoleic (omega-6) acid metabolism	3	1	FADS1	2	SCP2,ACSL1	0.94	0.115432
Fcgamma receptor (FCGR) dependent phagocytosis	4	1	LIMK1	3	CFL1,PAK1,FCGR2A	0.93	0.117225
Signaling by NOTCH2	2	1	NOTCH2	1	MDK	0.93	0.118682
Allograft rejection	7	2	IL1B,HLA-DOA	5	HARS,VIM,CASP7,CASP3,HLA-DPA1	0.92	0.119207
One-carbon metabolism	3	1	AHCY	2	MAT2B,TYMS	0.92	0.121312
Mechanoregulation and pathology of YAP/TAZ via Hippo and non-Hippo mechanisms	4	1	ITGB2	3	STK3,PAK1,YWHAQ	0.89	0.127553
Primary ovarian insufficiency	3	0		3	EXO1,RAD51,BLM	0.89	0.128334
Rubinstein-Taybi syndrome 1	2	1	CLOCK	1	PCNA	0.89	0.129621
ATF6 (ATF6-alpha) activates chaperone genes	2	0		2	ATF4,HSP90B1	0.89	0.129621
Growth factors and hormones in Beta-cell proliferation	3	0		3	EZH2,CDK2,CDK4	0.88	0.130798
Growth factors and hormones in Beta-cell proliferation	3	0		3	EZH2,CDK2,CDK4	0.88	0.130798
Extracellular vesicle-mediated signaling in recipient cells	3	2	ERBB2,KRAS	1	RAF1	0.88	0.130798
Eukaryotic translation elongation	1	0		1	EEF1D	0.87	0.133401
Glucose metabolism	1	0		1	G6PC3	0.87	0.133787
Signaling by PTK6	1	1	PTPN1	0		0.87	0.135934
DNA Double Strand Break Response	2	0		2	KPNA2,BABAM1	0.87	0.135941
Regulation of RUNX2 expression and activity	1	1	SMURF1	0		0.86	0.136971
Signaling by ERBB4	1	0		1	STMN1	0.86	0.136971
Cellular response to hypoxia	1	0		1	HIGD1A	0.86	0.136971
Transport of inorganic cations/anions and amino acids/oligopeptides	1	0		1	SLC7A3	0.86	0.139517
WHS	3	1	GAB1	2	SLBP,NELFE	0.85	0.140535
PI3K-AKT-mTOR signaling pathway and therapeutic opportunities	3	2	RICTOR,KRAS	1	RHEB	0.85	0.140535
Microtubule cytoskeleton regulation	4	1	CDC42	3	RAC1,AURKB,CDK1	0.85	0.142734
Mitotic Metaphase and Anaphase	8	1	CHMP4B	7	CHMP2A,RAD21,BANF1,SIRT2,CHMP2B,CHMP7,FBXO5	0.85	0.142869
Hedgehog signaling pathway	2	1	PTCH1	1	SAP18	0.84	0.144183
Cancer immunotherapy by CTLA4 blockade	2	2	PTPN11,PIK3CD	0		0.84	0.144183
Quercetin and Nf-kB / AP-1 induced apoptosis	2	1	MAFK	1	NFE2L2	0.84	0.144183
Deregulation of Rab and Rab effector genes in bladder cancer	2	1	MADD	1	RAB27A	0.84	0.144183
Regulation of toll-like receptor signaling pathway	10	3	IL1B,PIK3CD,TNFAIP3	7	CUEDC2,TLR7,MAP3K7,MAP2K6,MAP2K1,RAC1,TLR3	0.83	0.146623
Monoamine transport	3	1	IL1B	2	CDC25C,PPP2CB	0.82	0.150504
Prostaglandin and leukotriene metabolism in senescence	3	0		3	ALOX5AP,LTA4H,RB1	0.82	0.150504
15q13.3 copy number variation syndrome	3	3	RN7SL628P,RN7SL82P,SERPINH1	0		0.82	0.150504
Host-pathogen interaction of human coronaviruses - apoptosis	3	0		3	BID,CASP3,CASP7	0.82	0.150504
Constitutive androstane receptor pathway	3	1	SP1	2	HSP90AA1,SULT1A1	0.82	0.150504
IL-17 signaling pathway	3	1	SP1	2	TRAF3IP2,MAP3K7	0.82	0.150504
Interactions between immune cells and microRNAs in tumor microenvironment	4	1	IL4R	3	MIR21,IL2RG,TLR7	0.82	0.150579
Detoxification of reactive oxygen species	4	1	PRDX5	3	NUDT2,TXN2,TXN	0.82	0.150579
Mitotic G1 phase and G1/S transition	15	1	DYRK1A	14	PCNA,WEE1,RB1,GMNN,TK1,POLA1,MCM10,FBXO5,CCNA2,CDK2,CDC6,TYMS,CDK1,RRM2	0.81	0.153324
Primary focal segmental glomerulosclerosis (FSGS)	6	3	NOTCH1,LRP6,DAG1	3	VIM,PCNA,ILK	0.80	0.156929
Arachidonic acid (AA, ARA) oxylipin metabolism	1	0		1	TBXAS1	0.80	0.158081
Malate-aspartate shuttle	1	0		1	MDH1	0.80	0.158081
WikiPathways Academy: fig-met-1-third	1	0		1	LDHA	0.80	0.158081
Cell division cycle 27	1	0		1	CDK1	0.80	0.158081
Glycosaminoglycan degradation	2	0		2	GLB1,HEXB	0.80	0.159062
Cells and molecules involved in local acute inflammatory response	2	2	ITGB2,ITGA4	0		0.80	0.159062
Amplification and expansion of oncogenic pathways as metastatic traits	2	1	VHL	1	CXCR4	0.80	0.159062
Regulation of Wnt / B-catenin signaling by small molecule compounds	2	1	FZD8	1	TCF4	0.80	0.159062
Trafficking and processing of endosomal TLR	2	1	CNPY3	1	TLR3	0.80	0.159062
IL-9 signaling pathway	2	0		2	IL2RG,MAP2K1	0.80	0.159062
Antiviral and anti-inflammatory effects of Nrf2 on SARS-CoV-2 pathway	3	0		3	NFE2L2,NQO1,GUCY1B3	0.79	0.160691
Purinergic signaling	3	2	P2RY8,P2RY11	1	GNAS	0.79	0.160691
Inflammatory response pathway	3	2	TNFRSF1B,IL4R	1	IL2RG	0.79	0.160691
Signal transduction through IL1R	3	1	IL1B	2	MAP3K7,MAP2K6	0.79	0.160691
Telomere Maintenance	8	0		8	NOP10,RFC2,RFC5,RFC4,DNA2,POT1,FEN1,RFC3	0.78	0.166986
SARS-CoV-1 Infection	3	1	VHL	2	ZCRB1,RB1	0.77	0.170691
Familial partial lipodystrophy	3	1	LMNB1	2	BANF1,FNTA	0.77	0.171079
Type 2 papillary renal cell carcinoma	3	1	VHL	2	PRCC,CUL2	0.77	0.171079
WHS	3	1	GAB1	2	SLBP,NELFE	0.76	0.174205
Acquired partial lipodystrophy / Barraquer-Simons syndrome	2	1	LMNB1	1	FNTA	0.76	0.174205
Fatty acid transporters	2	1	FABP5	1	ACSL1	0.76	0.174205
Transcription co-factors SKI and SKIL protein partners	2	1	LATS2	1	STK3	0.76	0.174205
Platelet-mediated interactions with vascular and circulating cells	2	1	IL1B	1	TLR7	0.76	0.174205
OAS antiviral response	2	0		2	ABCE1,OAS1	0.76	0.174205
4-hydroxytamoxifen, dexamethasone, and retinoic acids regulation of p27 expression	2	0		2	EIF4EBP1,PBK	0.76	0.174205
MYD88 distinct input-output pathway	2	0		2	TLR7,TLR10	0.76	0.174205
SREBF and miR33 in cholesterol and lipid homeostasis	2	2	HMGCS1,LDLR	0		0.76	0.174205
Nucleotide-binding domain, leucine rich repeat containing receptor (NLR) signaling pathways	6	1	TNFAIP3	5	PYCARD,SUGT1,RIPK2,MAP2K6,TXN	0.76	0.174447
Signaling by ROBO receptors	7	4	EIF4G1,MYO9B,NRP1,ETF1	3	NELL2,NCK2,PABPC1	0.74	0.179989
Regulation of TP53 Activity through Phosphorylation	2	1	DYRK2	1	AURKB	0.74	0.181072
Photodynamic therapy-induced NF-kB survival signaling	3	1	IL1B	2	BIRC2,BIRC5	0.74	0.181651
Hedgehog 'on' state	2	2	ULK3,PTCH1	0		0.74	0.183066
Signaling by NTRK1	2	0		2	MAP2K5,ATF1	0.74	0.183931
Overview of proinflammatory and profibrotic mediators	2	1	IL1B	1	TNFSF13B	0.73	0.184940
S Phase	2	0		2	CDK2,WEE1	0.73	0.184940
NoRC negatively regulates rRNA expression	1	0		1	MBD2	0.73	0.188170
COPII-mediated vesicle transport	1	0		1	BET1	0.73	0.188208
TNF signaling	1	0		1	NSMAF	0.73	0.188208
NIK -&gt; non-canonical NF-kB signaling	1	0		1	UBA3	0.72	0.188462
Signaling by FGFR4	1	1	PTPN11	0		0.72	0.188462
Perturbations to host-cell autophagy, induced by SARS-CoV-2 proteins	5	0		5	TAX1BP1,ATG4A,ATG3,RHEB,TMEM59	0.72	0.189564
Mitochondrial gene expression	2	1	SP1	1	CAMK4	0.72	0.189564
Platelet homeostasis	1	1	PTPN11	0		0.72	0.190491
Protein ubiquitination	1	0		1	UBC	0.71	0.192861
Gamma carboxylation, hypusine formation and arylsulfatase activation	1	0		1	DPH6	0.71	0.192861
Sebaleic acid formation and metabolism	1	1	FADS1	0		0.71	0.193532
Ultraconserved region 339 modulation of tumor suppressor microRNAs in cancer	1	0		1	CCNE2	0.71	0.193532
miR-517 relationship with ARCN1 and USP1	1	0		1	USP1	0.71	0.193532
TET1,2,3 and TDG demethylate DNA	1	0		1	TDG	0.71	0.193532
RAB GEFs exchange GTP for GDP on RABs	1	1	MADD	0		0.71	0.194341
Transcriptional regulation by E2F6	5	1	EPC1	4	RRM2,UXT,RBBP8,RAD51	0.71	0.195677
TP53 Regulates Transcription of DNA Repair Genes	1	0		1	MSH2	0.71	0.196012
Visual phototransduction	1	0		1	CAMKMT	0.71	0.196012
Activation of Matrix Metalloproteinases	1	0		1	TIMP2	0.71	0.196012
SARS-CoV-2 Infection	4	2	VHL,MGAT5	2	ZCRB1,RB1	0.70	0.199486
Metabolism of water-soluble vitamins and cofactors	7	0		7	FLAD1,MOCS2,BTD,SLC25A19,LMBRD1,MMADHC,AASDHPPT	0.70	0.199911
Prostaglandin and leukotriene metabolism in senescence	3	0		3	ALOX5AP,LTA4H,RB1	0.69	0.203286
Neural crest differentiation	7	4	NOTCH1,NOTCH2,ZIC5,HDAC6	3	TCF4,PMP22,CTBP2	0.69	0.204530
Lactate shuttle in glial cells	2	1	SLC2A3	1	LDHA	0.69	0.205094
Calcium mediated T-cell apoptosis involved in inclusion body myositis	2	1	NFATC2	1	CAPN2	0.69	0.205094
Congenital generalized lipodystrophy	2	1	LPIN2	1	BSCL2	0.69	0.205094
Nanomaterial induced apoptosis	2	0		2	CASP7,CASP3	0.69	0.205094
AMP-activated protein kinase signaling	5	2	CAMKK2,ADIPOR2	3	CCNB1,STRADB,ADIPOR1	0.67	0.211840
Factors and pathways affecting insulin-like growth factor (IGF1)-Akt signaling	3	1	RICTOR	2	EIF2B2,ILK	0.67	0.214318
tRNA modification in the nucleus and cytosol	3	0		3	NSUN2,FTSJ1,TRMT10A	0.67	0.214318
Urea cycle and metabolism of amino groups	2	0		2	SRM,ARG2	0.66	0.220754
STING pathway in Kawasaki-like disease and COVID-19	2	1	IL1B	1	FCGR2A	0.66	0.220754
TYSND1 cleaves peroxisomal proteins	2	0		2	SCP2,PHYH	0.66	0.220754
Mismatch Repair	2	0		2	EXO1,MSH2	0.66	0.220754
Nicotine effect on dopaminergic neurons	2	0		2	CDK5,PPP1CA	0.66	0.220754
Leukocyte-intrinsic Hippo pathway functions	3	1	LATS2	2	YWHAQ,RAB13	0.65	0.225473
Melatonin metabolism and effects	3	2	CLOCK,PER3	1	SULT1A1	0.65	0.225473
miR-targeted genes in adipocytes	3	2	MIR20A,FADS1	1	CSRP1	0.65	0.225473
Folate metabolism	5	3	AHCY,LDLR,IL1B	2	RFK,FLAD1	0.65	0.226295
Estradiol regulation in porto-sinusoidal vascular disease	1	1	SP1	0		0.64	0.227491
SARS-CoV-2 altering angiogenesis via NRP1	1	1	NRP1	0		0.64	0.227491
Proline and hydroxyproline pathways	1	0		1	PEPD	0.64	0.227491
Metabolism of alpha-linolenic acid	1	1	FADS1	0		0.64	0.227491
Gamma-glutamyl cycle for the biosynthesis and degradation of glutathione, including diseases	1	0		1	GGCT	0.64	0.227491
Choline catabolism	1	0		1	ALDH7A1	0.64	0.227491
Intestinal absorption	1	1	RSC1A1	0		0.64	0.227491
Robo4 and VEGF signaling pathways crosstalk	1	0		1	RAC1	0.64	0.227491
Benzene metabolism	1	0		1	NQO1	0.64	0.227491
mir-124 predicted interactions with cell cycle and differentiation	1	0		1	STRADB	0.64	0.227491
Synthesis of wybutosine at G37 of tRNA(Phe)	1	0		1	TYW3	0.64	0.227491
miRNA biogenesis	1	1	DICER1	0		0.64	0.227491
PKC-gamma calcium signaling pathway in ataxia	2	2	PLCB2,GNA15	0		0.63	0.236504
Vitamin D in inflammatory diseases	2	1	PPP3R1	1	MAP2K6	0.63	0.236504
MECP2 and associated Rett syndrome	5	1	SP1	4	EZH2,CSRP1,TARDBP,PSIP1	0.62	0.242501
Meiotic recombination	5	0		5	RAD51C,RAD51,CDK4,BLM,CDK2	0.62	0.242501
Mitochondrial biogenesis	2	0		2	CYCS,ATP5B	0.61	0.245351
Transcriptional regulation of white adipocyte differentiation	2	0		2	CDK4,ZNF638	0.61	0.245351
Extra-nuclear estrogen signaling	2	2	UHMK1,SRF	0		0.61	0.245537
Circadian Clock	2	2	RAI1,CLOCK	0		0.61	0.245903
miRNA in muscle cell differentiation	3	2	SRF,PRKCH	1	EZH2	0.61	0.248093
Glycosphingolipid metabolism	2	1	B4GALT5	1	GLA	0.60	0.252310
Roles of ceramides in development of insulin resistance	2	1	RPS6KB1	1	ACSL1	0.60	0.252310
Sphingolipid metabolism overview	2	1	SPTLC2	1	ASAH1	0.60	0.252310
NRF2-ARE regulation	2	0		2	NQO1,CUL3	0.60	0.252310
Processing of SMDT1	2	1	MCU	1	MICU1	0.60	0.252310
Acetylcholine synthesis	1	0		1	PEMT	0.58	0.260019
Cytokine storm syndrome	1	1	IL1B	0		0.58	0.260019
Amino acid metabolism in triple-negative breast cancer cells	1	0		1	PHGDH	0.58	0.260019
SARS-CoV-2 replication organelle formation	1	1	ATG14	0		0.58	0.260019
Fructose metabolism	1	0		1	AKR1B1	0.58	0.260019
MTF1 activates gene expression	1	0		1	CSRP1	0.58	0.260019
WikiPathways Academy: fig-met-1-fourth	1	0		1	LDHA	0.58	0.260019
Wax and plasmalogen biosynthesis	1	0		1	DHRS7B	0.58	0.260019
MicroRNA for targeting cancer growth and vascularization in glioblastoma	1	1	HIF1AN	0		0.58	0.260019
DDX1 as a regulatory component of the Drosha microprocessor	1	0		1	DDX1	0.58	0.260019
Pentose phosphate metabolism	1	0		1	TALDO1	0.58	0.260019
Meiotic synapsis	1	1	SUN2	0		0.58	0.265486
PPAR Beta/Delta pathway	2	2	CPT1A,IL1B	0		0.57	0.268139
IL1 and megakaryocytes in obesity	2	1	IL1B	1	TIMP2	0.57	0.268139
Peroxisomal protein import	1	0		1	ZFAND6	0.56	0.274660
Prader-Willi and Angelman syndrome	6	0		6	RB1,CDC6,CDK4,CYFIP1,PCM1,BBS4	0.56	0.276895
Mitotic G2-G2/M phases	7	0		7	WEE1,AURKA,CDC25C,CCNB1,HMMR,CDK1,SKP1	0.56	0.277790
One-carbon metabolism and related pathways	4	0		4	GPX4,GPX1,TYMS,PEMT	0.55	0.281763
ncRNAs involved in Wnt signaling in hepatocellular carcinoma	7	3	FZD8,LRP6,MIR18A	4	UFC1,RYK,EZH2,CTBP2	0.55	0.281997
Cancer immunotherapy by PD-1 blockade	2	2	PTPN11,NFATC2	0		0.55	0.283960
IL-7 signaling pathway	2	0		2	MAP2K1,IL2RG	0.55	0.283960
Phosphodiesterases in neuronal function	4	2	ADCY6,PDE4B	2	PDE6D,GUCY1B3	0.54	0.285707
Hair follicle development: induction - Part 1 of 3	4	2	LRP6,PTCH1	2	TCF3,TCF4	0.54	0.285707
Hematopoietic stem cell differentiation	7	4	NFATC2,IL1B,MIR17,NOTCH1	3	HMGN5,CXCR4,MXI1	0.54	0.287905
Aflatoxin B1 metabolism	1	0		1	GSTM1	0.54	0.291179
Glucose metabolism in triple-negative breast cancer cells	1	0		1	LDHA	0.54	0.291179
Cerebral organic acidurias, including diseases	1	0		1	IDH2	0.54	0.291179
FTO obesity variant mechanism	1	1	ARID5B	0		0.54	0.291179
NAD biosynthesis II (from tryptophan)	1	0		1	AFMID	0.54	0.291179
HIF1A and PPARG regulation of glycolysis	1	0		1	LDHA	0.54	0.291179
Glial cell differentiation	1	0		1	PLP1	0.54	0.291179
Phase I biotransformations, non P450	1	0		1	ESD	0.54	0.291179
Transcriptional regulation by MECP2	3	2	SLC2A3,PTPN1	1	AURKB	0.53	0.291979
XBP1(S) activates chaperone genes	6	2	HYOU1,GFPT1	4	ATP6V0D1,SULT1A3,WIPI1,ACADVL	0.53	0.298172
Sphingolipid metabolism: integrated pathway	2	1	SPTLC2	1	ASAH1	0.52	0.299748
Glycosylation and related congenital defects	2	0		2	DPAGT1,ALG14	0.52	0.299748
Twelve loci associated with ADHD	2	1	KDM4A	1	POC1B	0.52	0.299748
Steatosis adverse outcome pathway	2	1	RICTOR	1	HSD17B4	0.52	0.299748
trans-Golgi Network Vesicle Budding	6	2	ARRB1,GBF1	4	TXNDC5,BLOC1S1,CHMP2A,NAPA	0.51	0.305884
Benzo(a)pyrene metabolism	1	0		1	AKR1C3	0.49	0.321027
Biotin metabolism, including IMDs	1	0		1	PCCB	0.49	0.321027
Somitogenesis in the context of spondylocostal dysostosis	1	1	NOTCH1	0		0.49	0.321027
Thiamine metabolic pathways	1	0		1	SLC25A19	0.49	0.321027
Folate-alcohol and cancer pathway hypotheses	1	0		1	ADH5	0.49	0.321027
Development of ureteric collection system	4	1	CRIM1	3	ILK,CTDNEP1,BMPR2	0.48	0.327480
Signaling by NOTCH3	2	0		2	YBX1,DLGAP5	0.48	0.330609
Nanoparticle-mediated activation of receptor signaling	2	1	KRAS	1	MAP2K1	0.48	0.331120
NR1H2 and NR1H3-mediated signaling	3	1	MYLIP	2	PLTP,GPS2	0.48	0.331462
TP53 Regulates Metabolic Genes	2	0		2	RRM2B,TXN	0.47	0.338390
Regulation of lipid metabolism by PPARalpha	10	7	CPT1A,HMGCS1,FADS1,RGL1,TIAM2,ABCB4,TBL1X	3	FDFT1,ACSL1,ACADM	0.47	0.340728
SARS-CoV-2 and COVID-19 pathway	2	1	NRP1	1	TLR7	0.46	0.346661
Selective expression of chemokine receptors during T-cell polarization	2	1	IL4R	1	CXCR4	0.46	0.346661
PDGFR-beta pathway	2	1	SRF	1	RAF1	0.46	0.346661
Canonical and non-canonical Notch signaling	2	2	NOTCH1,NOTCH2	0		0.46	0.346661
GABA synthesis, release, reuptake and degradation	2	2	SYT1,DNAJC5	0		0.46	0.346661
Lung fibrosis	4	1	IL1B	3	OBFC1,NFE2L2,MT2A	0.46	0.346883
Steroid biosynthesis	1	0		1	HSD17B4	0.46	0.349618
15q11.2 copy number variation syndrome	1	0		1	CYFIP1	0.46	0.349618
Activation of NLRP3 inflammasome by SARS-CoV-2	1	1	IL1B	0		0.46	0.349618
Reelin signaling pathway	1	0		1	VLDLR	0.46	0.349618
Lipid particles composition	1	1	LDLR	0		0.46	0.349618
Abacavir transport and metabolism	1	0		1	GUK1	0.46	0.349618
miRNA role in immune response in sepsis	4	1	MIR19A	3	TLR7,MAP3K7,MIR21	0.45	0.353698
Factors involved in megakaryocyte development and platelet production	7	0		7	CDK2,CDK5,RAD51C,CAPZB,WEE1,AK3,VPS45	0.44	0.360246
Endochondral ossification with skeletal dysplasias	4	4	PTCH1,HMGCS1,SERPINH1,THRA	0		0.44	0.360667
Endochondral ossification	4	4	PTCH1,HMGCS1,SERPINH1,THRA	0		0.44	0.360667
Pathogenesis of SARS-CoV-2 mediated by nsp9-nsp10 complex	2	0		2	IGLC2,IGLL1	0.44	0.362080
CCL18 signaling pathway	11	5	RAD51-AS1,ASAP1,SP1,CD44,ITGB2	6	VIM,ANXA2,TIMP2,CXCR4,CDC25C,LDHA	0.43	0.367778
Metabolism of non-coding RNA	4	3	SNRPE,SNRPG,SNRPD2	1	SNRPB	0.43	0.367778
B-WICH complex positively regulates rRNA expression	1	0		1	SMARCA5	0.43	0.375704
Neurotoxicity of clostridium toxins	1	1	SYT1	0		0.43	0.375704
SMC1/SMC3 role in DNA damage - Cornelia de Lange Syndrome	1	0		1	RAD21	0.42	0.377005
Autosomal recessive osteopetrosis pathways	1	1	CLCN7	0		0.42	0.377005
Aspirin and miRNAs	1	1	MVD	0		0.42	0.377005
PTF1A related regulatory pathway	1	1	NOTCH1	0		0.42	0.377005
Serotonin transporter activity	1	1	IL1B	0		0.42	0.377005
Nicotinate metabolism	2	0		2	NMRK1,NUDT12	0.42	0.377359
Toll-like receptor signaling related to MyD88	2	0		2	TLR7,TLR3	0.42	0.377359
T cell receptor and co-stimulatory signaling	2	2	DYRK1A,DYRK2	0		0.42	0.377359
TNFR2 non-canonical NF-kB pathway	1	1	TNFRSF1B	0		0.42	0.379081
Peptide GPCRs	1	0		1	CXCR4	0.42	0.379081
SARS-CoV-2 innate immunity evasion and cell-specific immune response	5	1	MAVS	4	RAE1,TLR7,IFITM1,TANK	0.41	0.388826
Asparagine N-linked glycosylation	8	5	ST6GAL1,MLEC,MGAT5,PDIA3,ENGASE	3	ALG6,ALG8,DPAGT1	0.41	0.391290
SARS coronavirus and innate immunity	2	1	MAVS	1	TLR3	0.41	0.392483
Eicosanoid metabolism via cyclooxygenases (COX)	2	0		2	AKR1B1,TBXAS1	0.41	0.392483
miRNA regulation of p53 pathway in prostate cancer	2	0		2	BID,CASP3	0.41	0.392483
Development and heterogeneity of the ILC family	2	2	IL1B,TOX	0		0.41	0.392483
Non-genomic actions of 1,25 dihydroxyvitamin D3	8	6	PLCB2,PRKCH,PIK3CD,PIK3C2B,SP1,KRAS	2	PIK3R4,OAS1	0.40	0.395057
Glyoxylate metabolism	1	0		1	GRHPR	0.39	0.403240
Inclusion body myositis	1	0		1	PSENEN	0.39	0.403240
Bile acids synthesis and enterohepatic circulation	1	1	LDLR	0		0.39	0.403240
Gene regulatory network modelling somitogenesis	1	1	NOTCH1	0		0.39	0.403240
Neurotransmitter clearance	1	0		1	COMT	0.39	0.403240
Disturbed pathways in Duchenne Muscular Dystrophy	1	1	MCU	0		0.39	0.403468
RAF-independent MAPK1/3 activation	1	0		1	MAP2K1	0.39	0.404866
Oxidative Stress Induced Senescence	4	1	EED	3	EZH2,RBBP7,SUZ12	0.38	0.421439
EPH-Ephrin signaling	4	0		4	CFL1,SDCBP,MYL12A,NCK2	0.38	0.421685
Mitotic Prophase	4	0		4	RB1,MASTL,MCPH1,ENSA	0.38	0.421685
Opioid receptor pathways	23	12	KRAS,RPS6KB1,CDC42,EEA1,RPS6KA1,ARRB1,IL1B,NRP1,SYT1,SP1,JUP,NOTCH1	11	MAP2K1,RAF1,FKBP1A,EIF4EBP1,GPX1,CASP3,RAC1,FTH1,YY1,YWHAQ,PYCARD	0.37	0.428239
Influence of laminopathies on Wnt signaling	3	2	AGO2,DICER1	1	TLE1	0.37	0.428239
Ganglio series sphingolipid metabolism	1	0		1	HEXB	0.37	0.428370
Resolvin E1 and resolvin D1 signaling pathways promoting inflammation resolution	1	1	PIK3CD	0		0.37	0.428370
Leukotriene metabolic pathway	1	0		1	LTA4H	0.37	0.428370
Modular map of bradykinin signaling network	14	4	CLCN7,NOTCH1,PRKCH,IL1B	10	BGLAP,RAC1,MAP2K1,TRPM7,CASP3,CASP7,GNAS,ROCK1,RAF1,VIM	0.37	0.428370
SARS-CoV-2 B.1.1.7 variant antagonises innate immune activation	1	1	MAVS	0		0.37	0.428370
ACE inhibitor pathway - for workshop	1	0		1	ATP6AP2	0.37	0.428370
rRNA modification in the mitochondrion	1	0		1	FTSJ2	0.37	0.428370
EDA signaling in hair follicle development	1	1	PTCH1	0		0.37	0.428370
Development of pulmonary dendritic cells and macrophage subsets	1	1	IRF4	0		0.37	0.428370
HDR through MMEJ (alt-NHEJ)	1	0		1	FEN1	0.37	0.428370
Estrogen receptor pathway	1	1	SP1	0		0.37	0.428370
mRNA Editing	1	1	ADAR	0		0.37	0.428370
Interferon alpha/beta signaling	9	3	PTPN1,ADAR,PTPN11	6	IFI6,ABCE1,IFITM3,IFITM1,PSMB8,IFITM2	0.37	0.429604
RNA Polymerase III Transcription	3	0		3	ZNF143,SSB,GTF3A	0.36	0.433173
tRNA aminoacylation	3	0		3	HARS,IARS2,NARS	0.36	0.433173
miRNA regulation of prostate cancer signaling pathways	3	1	KRAS	2	MAP2K1,RAF1	0.36	0.438426
Macroautophagy	2	0		2	ATG10,ATG3	0.35	0.442611
Transcriptional regulation of granulopoiesis	2	0		2	CDK4,CDK2	0.35	0.443026
Notch signaling	3	2	NOTCH2,NOTCH1	1	CTBP2	0.35	0.443975
Transcriptional regulation by RUNX2	2	1	HDAC6	1	RB1	0.35	0.448129
Mitochondrial protein import	2	0		2	PITRM1,TIMM22	0.35	0.448129
Amyloid fiber formation	2	1	SORL1	1	UBE2L6	0.35	0.449721
Mitochondrial translation	2	0		2	MRRF,MTIF3	0.35	0.449721
ATM signaling in development and disease	3	0		3	HMGN1,CEP63,CDK5	0.35	0.449797
Octadecanoid formation from linoleic acid	1	0		1	GPX4	0.34	0.452442
Mineralocorticoid biosynthesis	1	0		1	AKR1C3	0.34	0.452442
Tryptophan catabolism	1	0		1	AFMID	0.34	0.452442
Kennedy pathway from sphingolipids	1	0		1	PEMT	0.34	0.452442
Mitochondrial iron-sulfur cluster biogenesis	1	0		1	GLRX5	0.34	0.452442
Cell recruitment (pro-inflammatory response)	3	0		3	SUGT1,PYCARD,TXN	0.34	0.462172
Urotensin-II-mediated signaling pathway	8	3	IL1B,PTPN11,FSCN1	5	CAT,CASP3,PCNA,CDK1,CDK2	0.33	0.468684
Biogenic amine synthesis	1	0		1	COMT	0.32	0.475501
COVID-19 adverse outcome pathway	1	1	IL1B	0		0.32	0.475501
GPR40 pathway	1	1	PLCB2	0		0.32	0.475501
Transcriptional activation by NRF2 in response to phytochemicals	1	0		1	NQO1	0.32	0.475501
Iron metabolism in placenta	1	1	STEAP3	0		0.32	0.475501
GP1b-IX-V activation signaling	1	0		1	RAF1	0.32	0.475501
Ganglio sphingolipid metabolism	1	1	ST6GALNAC6	0		0.32	0.475501
17q12 copy number variation syndrome	10	8	TAF15,MYO19,CACNB1,PIP4K2B,TEC,ERBB2,MLLT6,SLFN5	2	MIEN1,AATF	0.32	0.476063
Kinesins	3	1	KIF9	2	KIF15,KIFAP3	0.32	0.482259
Vitamin B12 metabolism	3	2	LDLR,IL1B	1	MUT	0.32	0.482259
Intra-Golgi and retrograde Golgi-to-ER traffic	6	1	GBF1	5	STX10,ARFIP2,SCOC,USE1,STX18	0.32	0.483000
ESR-mediated signaling	6	2	FKBP4,SP1	4	CHD1,EBAG9,YY1,KPNA2	0.32	0.483631
Unfolded Protein Response	3	0		3	EIF2AK3,CREB3,ATF4	0.31	0.489286
Regulation of mitotic cell cycle	6	0		6	CDC20,BUB3,SKP2,NEK2,RB1,FBXO5	0.31	0.492286
TP53 Regulates Transcription of Cell Death Genes	3	1	STEAP3	2	BNIP3L,BIRC5	0.31	0.492990
Response of EIF2AK4 (GCN2) to amino acid deficiency	3	0		3	IMPACT,ASNS,ATF4	0.31	0.494457
Phase II - Conjugation of compounds	4	0		4	COMT,TPMT,PNP,NAT1	0.31	0.494457
Pathophysiological roles of DUX4 in FSHD1	1	1	UPF1	0		0.30	0.497589
Vitamin B12 disorders	1	0		1	MUT	0.30	0.497589
Vitamin D (calciferol) metabolism	1	0		1	CYP2R1	0.30	0.497589
NAD+ metabolism	1	0		1	SIRT2	0.30	0.497589
Rap1 signaling	1	0		1	RAF1	0.30	0.497589
Major pathway of rRNA processing in the nucleolus and cytosol	11	2	RPS14,NOL9	9	DIS3,ERI1,EXOSC10,LTV1,RIOK2,NOL11,PNO1,RIOK1,EXOSC5	0.30	0.501242
TGF-beta receptor signaling	3	2	ENG,ZFYVE9	1	FKBP1A	0.30	0.503736
NRP1-triggered signaling pathways in pancreatic cancer	3	1	NRP1	2	RAC1,CDK2	0.30	0.503736
Adipogenesis	7	2	SP1,LPIN2	5	ID3,GTF3A,RB1,GADD45A,BSCL2	0.29	0.508350
ACE inhibitor pathway	1	0		1	ATP6AP2	0.29	0.518747
PPAR-gamma pathway	1	1	IL1B	0		0.29	0.518747
Airway smooth muscle cell contraction	1	0		1	ROCK1	0.29	0.518747
MAPK pathway in congenital thyroid cancer	1	0		1	MAP2K1	0.29	0.518747
MAP3K1 role in promoting and blocking gonadal determination	1	0		1	ROCK1	0.29	0.518747
Leptin-insulin signaling overlap	1	0		1	SOCS2	0.29	0.518747
Canonical and non-canonical TGF-B signaling	1	0		1	BMPR2	0.29	0.518747
SRF and miRs in smooth muscle differentiation and proliferation	1	1	SRF	0		0.29	0.518747
Platelet adhesion to exposed collagen	1	0		1	LYN	0.29	0.518747
Markers of kidney cell lineage	1	1	NOTCH1	0		0.28	0.520443
Complement and coagulation cascades	1	1	TFPI	0		0.28	0.521000
Dengue-2 interactions with complement and coagulation cascades	1	1	TFPI	0		0.28	0.521858
EGR2 and SOX10-mediated initiation of Schwann cell myelination	1	0		1	PMP22	0.28	0.524428
Neurexins and neuroligins	1	1	PDLIM5	0		0.28	0.524428
Apoptotic execution phase	7	2	TJP2,LMNB1	5	BIRC2,VIM,ROCK1,SATB1,STK24	0.28	0.525415
Signaling by PDGF	1	1	PTPN11	0		0.28	0.528067
p75 NTR receptor-mediated signaling	4	0		4	RIPK2,MAGED1,AATF,ITGB3BP	0.27	0.531775
Complement system	4	1	GNA15	3	ICAM2,TXN,SELL	0.27	0.532101
FOXO-mediated transcription of oxidative stress, metabolic and neuronal genes	1	0		1	CAT	0.27	0.532688
Cell differentiation - expanded index	4	3	SRF,MIR20A,MIR17	1	EZH2	0.27	0.535340
Proteoglycan biosynthesis	1	1	SLC26A2	0		0.27	0.539014
Major receptors targeted by epinephrine and norepinephrine	1	1	ADCY6	0		0.27	0.539014
ncRNAs involved in STAT3 signaling in hepatocellular carcinoma	1	0		1	MIR21	0.27	0.539014
Tryptophan catabolism leading to NAD+ production	1	0		1	AFMID	0.27	0.539014
NOTCH1 regulation of endothelial cell calcification	1	1	NOTCH1	0		0.27	0.539014
Genes targeted by miRNAs in adipocytes	1	1	SRF	0		0.27	0.539014
Th17 cell differentiation pathway	4	4	IL1B,IRF4,IL4R,CLOCK	0		0.26	0.544535
Th17 cell differentiation pathway	4	4	IL1B,IRF4,IL4R,CLOCK	0		0.26	0.551598
Arrhythmogenic right ventricular cardiomyopathy	4	4	JUP,CACNB1,DAG1,ITGA4	0		0.26	0.555379
Nephrogenesis	1	1	NOTCH2	0		0.25	0.558428
Metabolic pathway of LDL, HDL and TG, including diseases	1	1	LDLR	0		0.25	0.558428
LTF danger signal response pathway	1	1	IL1B	0		0.25	0.558428
TGF-beta signaling in thyroid cells for epithelial-mesenchymal transition	1	0		1	VIM	0.25	0.558428
Farnesoid X receptor pathway	1	1	ABCB4	0		0.25	0.558428
Interleukin-3, Interleukin-5 and GM-CSF signaling	4	3	CSF2RB,TEC,PTPN11	1	BLNK	0.25	0.559314
DNA Damage/Telomere Stress Induced Senescence	4	1	LMNB1	3	ASF1A,RB1,POT1	0.25	0.563394
Male steroid hormones in cardiomyocyte energy metabolism	1	0		1	AKR1C3	0.24	0.577024
Dravet syndrome	1	1	RICTOR	0		0.24	0.577024
RHOBTB GTPase Cycle	1	0		1	RHOBTB2	0.24	0.577024
BMP signaling in eyelid development	1	1	NOTCH1	0		0.24	0.577024
Olfactory bulb development and olfactory learning	1	0		1	DPYSL2	0.24	0.577024
Iron uptake and transport	2	0		2	SKP1,GLRX3	0.23	0.588011
Tamoxifen metabolism	1	0		1	SULT1A1	0.23	0.594838
COPI-mediated anterograde transport	2	1	GBF1	1	BET1	0.23	0.594966
SUMOylation of chromatin organization proteins	2	0		2	SATB1,SUZ12	0.22	0.596702
T-cell activation SARS-CoV-2	5	2	PIK3CD,RICTOR	3	RAF1,MAP2K1,RHEB	0.22	0.598590
RNA polymerase II transcribes snRNA genes	5	2	SP1,PCF11	3	ZNF143,GTF2B,CDK7	0.22	0.605101
Synthesis of ceramides and 1-deoxyceramides	1	0		1	ASAH1	0.21	0.611901
FOXA2 pathway	1	0		1	GSTM2	0.21	0.611901
Glycerolipids and glycerophospholipids	1	0		1	PEMT	0.21	0.611901
Interleukin-9 signaling	1	0		1	IL2RG	0.21	0.611901
PI3K/AKT/mTOR - vitamin D3 signaling	1	0		1	LDHA	0.21	0.611901
Regulation of apoptosis by parathyroid hormone-related protein	1	0		1	BID	0.21	0.611901
Signaling by MET	5	4	GAB1,LRIG1,PTPRJ,PTPN11	1	RANBP9	0.20	0.624560
E3 ubiquitin ligases ubiquitinate target proteins	3	0		3	PRKDC,HLTF,RNF181	0.20	0.632997
Regulatory circuits of the STAT3 signaling pathway	4	2	CSF2RB,RICTOR	2	IL2RG,STMN1	0.20	0.633825
Plasma lipoprotein assembly, remodeling, and clearance	4	1	LDLR	3	LIPC,PLTP,VLDLR	0.20	0.634428
TP53 network	2	0		2	BID,GADD45A	0.19	0.649191
OSX and miRNAs in tooth development	2	2	NOTCH1,NOTCH2	0		0.18	0.653781
Sialic acid metabolism	2	0		2	NANS,SLC35A1	0.18	0.653781
IL-18 signaling pathway	14	6	RASA3,SP1,IL1B,RANGAP1,CPT1A,RPS6KB1	8	CYCS,PRCC,UCK1,MAP3K7,RAF1,BID,CASP3,BPGM	0.18	0.654724
Nuclear receptors in lipid metabolism and toxicity	2	1	ABCB4	1	ABCD3	0.18	0.658606
SUMOylation of DNA damage response and repair proteins	4	0		4	BLM,CETN2,TDG,XRCC4	0.18	0.664524
Wnt signaling in kidney disease	2	2	LRP6,FZD8	0		0.17	0.668854
ATF4 activates genes in response to endoplasmic reticulum stress	2	0		2	ATF4,ASNS	0.17	0.668854
Striated muscle contraction pathway	2	0		2	VIM,TPM3	0.17	0.674226
Metabolism of steroid hormones	2	0		2	AKR1B1,HSD17B11	0.17	0.674226
Immune infiltration in pancreatic cancer	2	1	IL1B	1	LGALS9	0.17	0.679733
Response of EIF2AK1 (HRI) to heme deficiency	2	0		2	ATF4,ASNS	0.17	0.679733
Glyoxylate metabolism and glycine degradation	2	0		2	GCSH,GRHPR	0.17	0.679733
Respiratory electron transport, ATP synthesis by chemiosmotic coupling, and heat production by uncoupling proteins.	7	0		7	ETFDH,NDUFAF4,NDUFAF3,NDUFAF2,NDUFS6,NDUFS3,TIMMDC1	0.17	0.680748
RHO GTPases activate PAKs	2	1	LIMK1	1	PAK1	0.16	0.685354
2q21.1 copy number variation syndrome	2	1	FAM168B	1	RAC1	0.16	0.696862
G-protein beta:gamma signaling	2	1	CDC42	1	PAK1	0.16	0.696862
Insulin processing	2	0		2	EXOC6,EXOC1	0.15	0.702715
Selenium metabolism and selenoproteins	2	0		2	GPX4,GPX1	0.15	0.708612
Growth hormone receptor signaling	2	1	PTPN1	1	LYN	0.15	0.708612
Interleukin-7 signaling	2	1	BRWD1	1	IL2RG	0.14	0.720486
Integrin signaling	1	1	PTPN1	0		0.14	0.723359
TNFs bind their physiological receptors	1	1	TNFRSF9	0		0.14	0.723359
Pluripotent stem cell differentiation pathway	1	1	NOTCH1	0		0.14	0.723486
Syndecan interactions	1	0		1	TRAPPC4	0.14	0.723486
Signaling by NTRK2 (TRKB)	1	1	PTPN11	0		0.14	0.723858
SUMOylation of ubiquitinylation proteins	1	1	VHL	0		0.14	0.724463
MAPK targets/ Nuclear events mediated by MAP kinases	1	0		1	ATF1	0.14	0.724463
Bile acid and bile salt metabolism	1	0		1	SLC27A2	0.14	0.724463
Cargo concentration in the ER	1	0		1	MIA3	0.14	0.726334
Interleukin-1 (IL-1) structural pathway	1	1	IL1B	0		0.14	0.726334
Interleukin-6 family signaling	1	1	PTPN11	0		0.14	0.729012
RET signaling	1	1	PTPN11	0		0.14	0.729012
Interleukin-20 family signaling	1	1	PTPN11	0		0.14	0.732413
Smooth Muscle Contraction	1	0		1	ANXA2	0.14	0.732413
TGF-beta receptor signaling in skeletal dysplasias	3	2	ENG,ZFYVE9	1	FKBP1A	0.13	0.738699
Pre-implantation embryo	3	2	IRF4,ZFP36	1	E2F5	0.13	0.738699
Cell differentiation - index	3	3	SRF,MIR20A,MIR17	0		0.13	0.738699
HIV Life Cycle	8	1	RANGAP1	7	GTF2B,PSIP1,PPIA,FEN1,RANBP1,BANF1,RNGTT	0.13	0.740840
rRNA modification in the nucleus and cytosol	3	0		3	TSR3,DIMT1,PNO1	0.13	0.741072
Oxidation by cytochrome P450	3	1	CYP20A1	2	CYB5A,CYP2R1	0.12	0.751712
Oncogene Induced Senescence	3	2	SP1,ERF	1	RB1	0.12	0.751712
SUMOylation of DNA replication proteins	3	0		3	AURKA,PCNA,TOP2B	0.11	0.770245
Fanconi Anemia Pathway	2	0		2	FANCI,UBE2T	0.11	0.770993
RIPK1-mediated regulated necrosis	2	0		2	SDCBP,MLKL	0.11	0.771339
Nonhomologous End-Joining	2	0		2	PRKDC,BABAM1	0.11	0.772213
Netrin-1 signaling	2	1	PTPN11	1	SIAH2	0.11	0.772213
DNA Damage Bypass	2	0		2	MAD2L2,REV3L	0.11	0.773581
Transcriptional activity of SMAD2/SMAD3:SMAD4 heterotrimer	2	1	SP1	1	SNW1	0.11	0.776484
Transcriptional regulation by the AP-2 (TFAP2) family of transcription factors	4	1	ERBB2	3	YY1,ATAD2,YEATS4	0.10	0.788399
Hair follicle development: cytodifferentiation - part 3 of 3	5	3	S100A4,NOTCH1,LRIG1	2	TCF3,TCF4	0.10	0.796134
Intrinsic Pathway for Apoptosis	3	1	XIAP	2	CYCS,DIABLO	0.10	0.800826
DNA Replication Pre-Initiation	5	0		5	ORC4,GMNN,CDC6,ORC3,MCM10	0.09	0.805850
MicroRNAs in cardiomyocyte hypertrophy	5	2	PIK3CD,LRP6	3	RAC1,ROCK1,RAF1	0.09	0.806804
Signaling by EGFR	5	4	LRIG1,GAB1,PTPN11,PAG1	1	PTPRK	0.09	0.813797
DDX58/IFIH1-mediated induction of interferon-alpha/beta	5	2	MAVS,RNF125	3	PIN1,TANK,PCBP2	0.09	0.819501
Cell junction organization	4	1	VASP	3	CTNND1,RSU1,ILK	0.09	0.820596
Nonsense-Mediated Decay (NMD)	4	2	EIF4G1,UPF1	2	PNRC2,PABPC1	0.09	0.822047
L1CAM interactions	6	2	NRP1,VAV2	4	PAK1,LYPLA2,SDCBP,RANBP9	0.08	0.831888
Synthesis of DNA	5	0		5	DNA2,FEN1,GINS2,GINS3,CDC6	0.08	0.835850
HDR through Homologous Recombination or Single Strand Annealing	6	0		6	RHNO1,BABAM1,RAD51AP1,CHEK1,RAD51C,RAD51	0.07	0.847713
Host Interactions of HIV factors	7	2	CCNT1,RANGAP1	5	ELMO1,SKP1,RAC1,RANBP1,AP2M1	0.07	0.857227
Cilium Assembly	10	4	HDAC6,TNPO1,IFT172,GBF1	6	PDE6D,IFT52,SEPT2,BBS4,BBS2,IFT74	0.06	0.870713
Assembly of the primary cilium	10	4	IFT172,HDAC6,GBF1,TNPO1	6	IFT74,IFT52,BBS2,BBS4,PDE6D,SEPT2	0.06	0.870713
Estrogen signaling pathway	1	1	SP1	0		0.00	1000000
Glucose homeostasis	1	0		1	GCA	0.00	1000000
EPO receptor signaling	1	0		1	RAF1	0.00	1000000
Role of hypoxia, angiogenesis, and FGF pathway in OA chondrocyte hypertrophy	2	2	JUND,VHL	0		0.00	1000000
IL-26 signaling pathways	2	1	IL1B	1	CASP3	0.00	1000000
1p36 copy number variation syndrome	5	2	CDK11B,SLC35E2B	3	CUL3,PHKG2,INTS10	0.00	1000000
Female steroid hormones in cardiomyocyte energy metabolism	1	0		1	HADHB	0.00	1000000
Metabolic pathways of fibroblasts	1	0		1	PHGDH	0.00	1000000
Cytokines and inflammatory response	1	1	IL1B	0		0.00	1000000
Sildenafil treatment	1	1	PDE4B	0		0.00	1000000
Chronic hyperglycemia impairment of neuron function	1	1	PRKCH	0		0.00	1000000
LDL- influence on CD14 and TLR4	1	0		1	CREB3	0.00	1000000
Neurogenesis regulation in the olfactory epithelium	2	0		2	RTN4,CDK5	0.00	1000000
Hippocampal synaptogenesis and neurogenesis	1	0		1	PRL	0.00	1000000
2q11.2 copy number variation syndrome	2	1	ERBB2	1	COX11	0.00	1000000
Diet-dependent trimethylamine/trimethylamine N-oxide metabolism	1	0		1	ALDH7A1	0.00	1000000
GDNF signaling	19	9	GAB1,GAB2,PTPN11,LRIG1,SORL1,VAV2,SP1,ETV5,RPS6KB1	10	RAF1,ATF1,ROCK1,MAP2K5,MAP2K1,RAC1,CCNA2,CCNB1,LYN,AP2M1	0.00	1000000
Elabela signaling pathway	9	3	IL1B,RPS6KB1,ARRB1	6	CASP3,ATP6AP2,CYCS,VIM,CHEK1,EIF4EBP1	0.00	1000000
Interactions of natural killer cells in pancreatic cancer	1	1	NCR3LG1	0		0.00	1000000
Prostaglandin signaling	1	1	IL1B	0		0.00	1000000
Kallmann syndrome	1	1	PTPN11	0		0.00	1000000
FOXP3 in COVID-19	1	0		1	IL2RG	0.00	1000000
Kynurenine pathway and links to cell senescence	1	0		1	AFMID	0.00	1000000
Amino acid transport defects (IEMs)	1	0		1	SLC3A2	0.00	1000000
FLT3 Signaling	5	3	PTPN11,GAB2,PTPRJ	2	SOCS2,FLT3	0.00	1000000
FOXO-mediated transcription	1	0		1	TXN	0.00	1000000
Blood group systems biosynthesis	1	1	ST6GALNAC6	0		0.00	1000000
Metabolism of cofactors	1	0		1	PHB	0.00	1000000
FOXO-mediated transcription of cell cycle genes	1	0		1	GADD45A	0.00	1000000
NGF-stimulated transcription	3	2	CHD4,SRF	1	CDK5	0.00	1000000
RAS and bradykinin pathways in COVID-19	2	1	IL1B	1	ROCK1	0.00	1000000
1q21.1 copy number variation syndrome	1	1	TJP2	0		0.00	1000000
mBDNF and proBDNF regulation of GABA neurotransmission	1	0		1	ROCK1	0.00	1000000
Renin-angiotensin-aldosterone system (RAAS)	5	1	PLCB2	4	CAMK4,ATF1,CREB3,ATF4	0.00	1000000
Thyroid hormones production and peripheral downstream signaling effects	4	1	RPS6KB1	3	RHEB,RAF1,TTF2	0.00	1000000
Eicosanoid metabolism via lipooxygenases (LOX)	1	0		1	LTA4H	0.00	1000000
Vitamin D-sensitive calcium signaling in depression	1	0		1	NFE2L2	0.00	1000000
Leucine, isoleucine and valine metabolism	1	0		1	PCCB	0.00	1000000
Aerobic glycolysis - augmented	1	0		1	PHGDH	0.00	1000000
Relationship between inflammation, COX-2 and EGFR	1	1	KRAS	0		0.00	1000000
Resistin as a regulator of inflammation	1	1	PLCB2	0		0.00	1000000
Glutamate binding, activation of AMPA receptors and synaptic plasticity	1	0		1	MYO6	0.00	1000000
Signaling by Erythropoietin	1	1	GAB1	0		0.00	1000000
Signaling by Retinoic Acid	2	1	FABP5	1	AKR1C3	0.00	1000000
Interleukin-15 signaling	1	1	GAB2	0		0.00	1000000
Neovascularisation processes	1	0		1	CXCR4	0.00	1000000
Oligodendrocyte specification and differentiation, leading to myelin components for CNS	1	0		1	PLP1	0.00	1000000
GABA receptor signaling	2	0		2	GABARAP,AP2M1	0.00	1000000
White fat cell differentiation	1	1	IRF4	0		0.00	1000000
Fibrin complement receptor 3 signaling pathway	1	0		1	TLR3	0.00	1000000
Listeria monocytogenes entry into host cells	1	0		1	CTNND1	0.00	1000000
Regulation of RUNX1 Expression and Activity	1	1	PTPN11	0		0.00	1000000
Fatty acyl-CoA biosynthesis	1	0		1	PPT1	0.00	1000000
Digestion	1	0		1	PIR	0.00	1000000
Phase I - Functionalization of compounds	4	1	ACSS1	3	CYP2R1,TBXAS1,BPHL	0.00	1000000
Nucleotide salvage	2	0		2	ADA,ADK	0.00	1000000
RUNX1 and FOXP3 control the development of regulatory T lymphocytes (Tregs)	1	1	NFATC2	0		0.00	1000000
HSP90 chaperone cycle for steroid hormone receptors (SHR)	1	1	FKBP4	0		0.00	1000000
Synaptic adhesion-like molecules	1	0		1	RTN3	0.00	1000000
Nucleobase catabolism	1	0		1	DNPH1	0.00	1000000
NO/cGMP/PKG mediated neuroprotection	2	1	XIAP	1	GUCY1B3	0.00	1000000
T-cell antigen receptor (TCR) pathway during Staphylococcus aureus infection	2	1	DAG1	1	CDK4	0.00	1000000
Retinoid metabolism and transport	1	1	LDLR	0		0.00	1000000
Regulation of TP53 Activity through Methylation	1	0		1	SMYD2	0.00	1000000
Regulation of TP53 Activity through Acetylation	1	0		1	PIN1	0.00	1000000
SALM protein interactions at the synapse	1	0		1	RTN3	0.00	1000000
TP53 regulates transcription of cell cycle genes	3	0		3	AURKA,GADD45A,CDC25C	0.00	1000000
SUMOylation of RNA binding proteins	2	0		2	NOP58,HNRNPC	0.00	1000000
Physico-chemical features and toxicity-associated pathways	2	1	FZD8	1	GPX1	0.00	1000000
Hypothesized pathways in pathogenesis of cardiovascular disease	1	1	ENG	0		0.00	1000000
Surfactant metabolism	2	0		2	ZDHHC2,CCDC59	0.00	1000000
Endosomal sorting complex required for transport	1	0		1	CHMP7	0.00	1000000
Sulfur amino acid metabolism	1	0		1	TXN2	0.00	1000000
Metabolism of polyamines	2	0		2	SRM,NQO1	0.00	1000000
Mitophagy	2	1	MFN2	1	FUNDC1	0.00	1000000
Ovarian infertility	1	0		1	CDK4	0.00	1000000
Base-Excision Repair, AP Site Formation	2	0		2	TDG,SMUG1	0.00	1000000
RHO GTPases activate NADPH oxidases	1	0		1	PIN1	0.00	1000000
Uptake and function of anthrax toxins	1	0		1	MAP2K1	0.00	1000000
Signaling by leptin	1	1	PTPN11	0		0.00	1000000
RORA activates gene expression	1	1	CPT1A	0		0.00	1000000
RHO GTPases activate ROCKs	1	0		1	CFL1	0.00	1000000
RHO GTPases activate PKNs	1	0		1	CDC25C	0.00	1000000
Toll-like receptor 3 (TLR3) cascade	2	0		2	TANK,TLR3	0.00	1000000
RHO GTPases activate KTN1	1	0		1	KTN1	0.00	1000000
Caspase activation via dependence receptors in the absence of ligand	1	0		1	MAGED1	0.00	1000000
miRNA targets in ECM and membrane receptors	1	1	COL6A3	0		0.00	1000000
Pregnane X receptor pathway	1	0		1	HSP90AA1	0.00	1000000
Hair follicle development: organogenesis - part 2 of 3	1	1	PTCH1	0		0.00	1000000
Transcriptional regulation of pluripotent stem cells	1	1	SALL4	0		0.00	1000000
Cardiac hypertrophic response	2	0		2	RAC1,RAF1	0.00	1000000
SUMOylation	1	0		1	SUMO1	0.00	1000000
Toll-like Receptor Cascades	1	0		1	TLR10	0.00	1000000
MyD88-independent TLR4 cascade	2	1	PTPN11	1	TANK	0.00	1000000
PI Metabolism	4	2	PNPLA6,MTMR12	2	MTMR2,MTMR9	0.00	1000000
Signaling by TGF-beta Receptor Complex	3	1	SMURF1	2	FKBP1A,STRAP	0.00	1000000
Inositol phosphate metabolism	2	0		2	MTMR9,MINPP1	0.00	1000000
Glycerophospholipid biosynthesis	5	1	MBOAT7	4	ABHD3,GNPAT,PEMT,AGPAT5	0.00	1000000
Regulation of mRNA stability by proteins that bind AU-rich elements	5	4	ZFP36L1,ZFP36,TNPO1,EIF4G1	1	PABPC1	0.00	1000000
Interleukin-2 family signaling	2	0		2	LGALS9,IL2RG	0.00	1000000
Metabolism of angiotensinogen to angiotensins	1	1	CTSZ	0		0.00	1000000
Signaling by Hippo	1	1	TJP2	0		0.00	1000000
Signaling by SCF-KIT	2	2	PTPN11,GAB2	0		0.00	1000000
Fertilization	1	0		1	CD9	0.00	1000000
DAG and IP3 signaling	2	0		2	CAMK4,KPNA2	0.00	1000000
Prolactin receptor signaling	1	1	PTPN11	0		0.00	1000000
ISG15 antiviral mechanism	3	0		3	UBE2L6,PIN1,PPM1B	0.00	1000000
Ebstein-Barr virus LMP1 signaling	1	0		1	MAP3K7	0.00	1000000
Polycystic kidney disease pathway	1	0		1	RHEB	0.00	1000000
Cardiac progenitor differentiation	2	1	NOTCH1	1	CXCR4	0.00	1000000
Metastatic brain tumor	1	1	CDC42	0		0.00	1000000
Thyroxine (thyroid hormone) production	1	0		1	RAF1	0.00	1000000
Opioid signaling	5	1	PDE4B	4	CDK5,CAMK4,KPNA2,PPP1CA	0.00	1000000
Integrated cancer pathway	2	0		2	ATF1,MIR21	0.00	1000000
Transport of vitamins, nucleosides, and related molecules	2	0		2	SLC25A4,SLC35A1	0.00	1000000
Transport of bile salts and organic acids, metal ions and amine compounds	3	2	RSC1A1,SLC39A7	1	SLC5A3	0.00	1000000
Thrombin signaling through proteinase activated receptors (PARs)	1	1	ARRB1	0		0.00	1000000
Semaphorin interactions	4	3	NRP1,SEMA4D,LIMK1	1	CFL1	0.00	1000000
RNA Polymerase II Transcription	7	1	AFF4	6	NELFCD,SUPT4H1,NELFE,GTF2B,RNGTT,TCEB2	0.00	1000000
Processing of Capped Intronless Pre-mRNA	1	0		1	SLBP	0.00	1000000
Peroxisomal lipid metabolism	1	0		1	SLC27A2	0.00	1000000
Neurotransmitter release cycle	2	1	SYT1	1	ARL6IP5	0.00	1000000
Myogenesis	1	0		1	TCF3	0.00	1000000
mRNA Capping	1	0		1	RNGTT	0.00	1000000
Metabolism of porphyrins	1	0		1	UROS	0.00	1000000
Metabolism of nitric oxide: NOS3 activation and regulation	1	0		1	HSP90AA1	0.00	1000000
Gap junction trafficking and regulation	1	0		1	MYO6	0.00	1000000
Eukaryotic translation initiation	5	1	EIF4G1	4	EIF4EBP1,EIF1AX,EIF4E,PABPC1	0.00	1000000
Nuclear receptors	1	1	THRA	0		0.00	1000000
Energy metabolism	2	1	PPP3R1	1	CAMK4	0.00	1000000
Angiogenesis	1	0		1	TIMP2	0.00	1000000
Physiological and pathological hypertrophy of the heart	1	0		1	RAC1	0.00	1000000
Sphingolipid pathway	1	0		1	ASAH1	0.00	1000000
Matrix metalloproteinases	1	0		1	TIMP2	0.00	1000000
GPCRs, other	4	1	P2RY11	3	LGR6,GPR18,ALG6	0.00	1000000

## Sheet: T3
Table S3: WikiPathway Analysis: 24 h vs. DMSO control
Pathway	#Total	#Up	Up List	#Down	Down List	Significance	p-value
Elabela signaling pathway	1	0		1	AKT1S1	42064	0.000714
Perturbations to host-cell autophagy, induced by SARS-CoV-2 proteins	1	0		1	AKT1S1	25965	0.001938
Steatosis adverse outcome pathway	1	0		1	AKT1S1	21217	0.002651
Autophagy	1	0		1	AKT1S1	18660	0.003058
JAK-STAT signaling in the regulation of Beta-cells	1	0		1	AKT1S1	16469	0.003567
Target of rapamycin signaling	1	0		1	AKT1S1	16103	0.003668
Factors and pathways affecting insulin-like growth factor (IGF1)-Akt signaling	1	0		1	AKT1S1	15008	0.003872
Neurodegeneration with brain iron accumulation (NBIA) subtypes pathway	1	0		1	AKT1S1	12816	0.004482
MTOR signaling	1	0		1	AKT1S1	10990	0.004990
DYRK1A involvement regarding cell proliferation in brain development	1	0		1	AKT1S1	43497	0.006412
Clear cell renal cell carcinoma pathways	1	0		1	AKT1S1	45048	0.008845
p53 transcriptional gene network	1	0		1	AKT1S1	2.00	0.009958
Thermogenesis	1	0		1	AKT1S1	35065	0.010969
Senescence and autophagy in cancer	1	0		1	AKT1S1	33970	0.011676
Fragile X syndrome	1	0		1	AKT1S1	33239	0.012181
PIP3 activates AKT signaling	1	0		1	AKT1S1	25934	0.019326
Focal adhesion: PI3K-Akt-mTOR-signaling pathway	1	0		1	AKT1S1	18994	0.030404
VEGFA-VEGFR2 signaling	1	0		1	AKT1S1	13150	0.044120
Regulatory circuits of the STAT3 signaling pathway	1	0		1	AKT1S1	0.00	1000000

## Sheet: T4
Table S4: WikiPathway Analysis: 36 h vs. DMSO control
Pathway	#Total	#Up	Up List	#Down	Down List	Significance	p-value
VEGFA-VEGFR2 signaling	58	23	NRP1,PTPN11,CDC42,VAV2,CAMKK2,PDPK1,FBXW11,EEA1,MAP2K7,NFATC2,SRF,BCL2,ETS1,MDM2,S1PR1,ENG,TMEM170A,EIF4G1,RPL7,SSR3,FSCN1,PTPN14,RPL27	35	FAF1,CAPN2,ROCK1,RAF1,PAK1,ATF4,CTNND1,MMP14,IGFBP7,CYCS,TRAF3IP2,SLC39A14,PNP,APOLD1,LARP7,SDCBP,CSRP2,DECR1,DNAJA1,PABPC1,PRDX6,SRP54,ATP6V1E1,CCT7,CSRP1,EPRS,FARSB,MOV10,NAPA,NEXN,PSMD4,RCN1,RPL10A,TRIP4,TXNDC5	18.73	0.000000
miR-targeted genes in lymphocytes	62	22	NOTCH2,UBE2S,FADS3,CYP51A1,PPP2R4,KRAS,FNDC3B,NRP1,MYO10,GFPT1,PPP3R1,PLAG1,LUZP1,BCL2,ADAR,FADS1,LMNB2,DHFR,METTL7A,BRI3BP,MYLIP,MIR155	40	IFRD1,POLR2C,RCN2,RTN4,CSRP1,DHX40,ASH2L,RAB34,TPM2,CDK5RAP1,MLLT11,GALNT7,MTX1,BET1,SLC25A13,RARS,PPIF,NT5E,GOLGA7,NARS,CHD1,CHMP2A,ANXA2,SDCBP,DHX15,ATG3,RHEB,MOV10,ATP6V1F,CARHSP1,GSTM4,TAF9B,ARFIP2,AP3B1,MATR3,PPP1R7,DOCK5,GEMIN7,MIR196B,MIR21	18.36	0.000000
Ciliary landscape	39	6	EXOC8,ERF,IFT172,COX6C,AGPAT2,PSMC6	33	GLA,IFT52,MFAP1,LZTFL1,TSSC1,BBS9,COPS2,CTBP2,SNRPB2,IFT46,WEE1,COPS8,IFT74,MCM6,AIMP1,TTC8,EXOSC9,IFT22,EXOC6,EXOC1,BBS2,DYNLRB1,MAPRE2,DYNC1I2,RANBP9,HTRA2,LRPPRC,EIF5B,PSMD13,AAR2,DOCK5,PSMD7,PSMC4	17.72	0.000000
Alzheimer's disease	41	10	PPP3R1,PLCB2,MCU,PIK3CD,KRAS,ATG2A,TUBA4A,LRP6,MAP2K7,PSMC6	31	NAE1,PSENEN,IDE,BID,CYCS,PPP3CC,CASP3,SNCA,CAPN2,CDK5,CASP7,RTN4,RAF1,ULK1,ATG101,PIK3R4,NRBF2,PIK3C3,WIPI1,ATF4,XBP1,PSMB7,PSMC4,PSMC2,PSMD7,PSMD4,PSMD13,PPIF,SLC25A4,VDAC2,VDAC3	15.54	0.000000
miR-targeted genes in epithelium	45	15	LMNB2,CYP51A1,GFPT1,NRP1,ADAR,MYO10,FNDC3B,FADS3,PPP2R4,KRAS,MIR155,FADS1,BRI3BP,UBE2S,NOTCH2	30	IFRD1,GALNT7,GOLGA7,DOCK5,POLR2C,DHX40,ATG3,MATR3,MTX1,CSRP1,NARS,MIR21,CHD1,RCN2,CHMP2A,RAB34,NT5E,ARFIP2,CDK5RAP1,DHX15,GEMIN7,RARS,RTN4,PPIF,PPP1R7,GSTM4,ANXA2,RHEB,SDCBP,MIR196B	14.25	0.000000
Alzheimer's disease and miRNA effects	42	10	PPP3R1,PLCB2,MCU,PIK3CD,KRAS,ATG2A,TUBA4A,LRP6,MAP2K7,PSMC6	32	NAE1,PSENEN,IDE,BID,CYCS,PPP3CC,CASP3,SNCA,CAPN2,CDK5,CASP7,MIR21,RTN4,RAF1,ULK1,ATG101,PIK3R4,NRBF2,PIK3C3,WIPI1,ATF4,XBP1,PSMB7,PSMC4,PSMC2,PSMD7,PSMD4,PSMD13,PPIF,SLC25A4,VDAC2,VDAC3	1988-12-01	0.000000
RNA pol II transcription - Initiation and elongation	21	6	GTF2A1,TAF8,TAF13,MED16,MED22,AFF4	15	LEO1,LARP7,CDK7,GTF2F2,GTF2E2,GTF2A2,GTF2B,TAF2,TAF9,TAF9B,TAF10,TAF12,MED11,MED19,CDK8	2027-12-01	0.000000
miR-targeted genes in muscle cell	46	16	FNDC3B,NRP1,MYO10,BCL2,ERBB2,LMNB2,NOTCH2,SRF,CYP51A1,PPP2R4,METTL7A,KRAS,GFPT1,ADAR,LUZP1,MIR155	30	DHX15,PPIF,IFRD1,NT5E,CARHSP1,TPM2,ASH2L,SDCBP,GEMIN7,CHD1,CSRP1,GALNT7,MOV10,GSTM4,RAB34,SLC25A13,DOCK5,BET1,AP3B1,RCN2,CHMP2A,PPP1R7,CDK5RAP1,POLR2C,RTN4,MATR3,RARS,RHEB,DHX40,MIR21	2023-08-12	0.000000
Nonalcoholic fatty liver disease	27	8	PIK3CD,ADIPOR2,CDC42,NDUFA1,NDUFA13,COX6C,BAX,IL6R	19	PRKAG1,CASP3,CASP7,NDUFA2,NDUFA3,NDUFA6,NDUFB9,NDUFS8,NDUFC2,NDUFC2-KCTD14,SDHB,UQCRC1,UQCRC2,COX6B1,COX7A2L,CYCS,XBP1,ATF4,BID	2023-01-12	0.000000
Electron transport chain: OXPHOS system in mitochondria	22	5	ATP5I,COX6C,ND6,NDUFA1,ATP5G3	17	COX6B1,ATP5J2,NDUFA3,NDUFA6,NDUFB9,NDUFA2,UQCRC2,ATP5J,SDHB,COX7A2L,ATP5G1,SLC25A4,UQCRC1,NDUFC2,ATP5D,ATP5C1,NDUFS8	1968-11-01	0.000000
Integrated breast cancer pathway	27	10	MDM2,BCL2,KRAS,BRCA1,BRCA2,TFPI,SP1,BAX,DAG1,CDC42	17	RPP38,WEE1,BMPR2,MIR21,BLM,IMPA1,CASP3,ATF1,RHEB,BID,PHB,GADD45A,TRADD,CDK4,CDK7,PAK1,RALGAPA1	2022-11-01	0.000000
Cholesterol metabolism with Bloch and Kandutsch-Russell pathways	15	8	DHCR24,CYP51A1,HMGCS1,MVD,LSS,MYLIP,FADS1,SCD	7	NSDHL,IDI1,FDFT1,GGPS1,ACSL1,ACSL4,ACOT2	1994-10-01	0.000000
Eukaryotic transcription initiation	14	2	TAF13,POLR1A	12	CDK7,GTF2A2,GTF2F2,GTF2B,POLR2K,TAF12,POLR2B,POLR2C,POLR2I,POLR2H,TAF9,GTF2E2	1971-10-01	0.000000
B cell receptor signaling pathway	20	14	SH3BP2,VAV2,NFATC2,RPS6KA1,GAB2,PTPN11,PLCG2,ETS1,CDC42,PDPK2,PDPK1,CRKL,PIP5K1B,CD22	6	RAF1,MALT1,CD19,CD81,BLNK,BLK	2021-10-01	0.000000
Zinc homeostasis	13	1	SLC39A7	12	SLC39A4,MT1A,MT1B,MT1E,MT1F,MT1G,MT1H,MT1M,MT2A,MT1L,SLC30A9,SLC39A14	2017-10-01	0.000000
Senescence and autophagy in cancer	21	7	CDKN1A,LAMP1,IL6R,GSN,CD44,MDM2,BCL2	14	IGFBP7,SQSTM1,CDK4,ATG12,CREG1,ATG3,MMP14,ATG10,ULK1,PIK3C3,GABARAP,RSL1D1,SLC39A4,RAF1	1991-09-01	0.000000
Copper homeostasis	14	4	SP1,COMMD1,MDM2,XIAP	10	MT1A,MT1B,MT1E,MT1F,MT1G,MT1H,MT1JP,MT1L,MT2A,CASP3	1980-08-01	0.000000
Ferroptosis	15	0		15	CHMP5,FDFT1,ACSL1,VDAC2,AKR1C3,GCLC,SLC3A2,GCH1,GPX4,SLC39A14,ACSL4,ACSL5,FTL,NCOA4,VDAC3	1974-08-01	0.000000
Proteasome degradation	15	3	HIST1H2AB,H2AFX,PSMC6	12	UBC,PSME1,PSMB8,PSMD7,PSMB9,PSMD10,PSMD13,UBE2D1,PSMC4,PSMD4,PSMB7,PSMC2	1974-08-01	0.000000
DNA repair pathways, full network	20	7	RPA3,BRCA2,FANCA,FANCD2,FANCC,BRCA1,POLH	13	RFC2,RFC4,POLE2,POLD4,CETN2,CDK7,NHEJ1,APEX1,POLB,SMUG1,RAD54B,FAAP24,POLI	1974-08-01	0.000000
Nuclear receptors meta-pathway	34	11	SLC26A2,SP1,SLC7A5,ABCB4,PDE4B,PPP2R4,ABHD2,CPT1A,NRIP1,SLC39A7,SCD	23	TSC22D3,CBR1,CAP2,NFE2L2,MGST3,FTL,GSTA4,NQO1,PRDX6,ALOX5AP,SQSTM1,GCLC,BIRC2,GSTP1,AIP,SCP2,CDK4,GSTM5,GSTM1,GSTM2,GSTM4,SLC39A4,SLC39A14	1972-08-01	0.000000
Cytoplasmic ribosomal proteins	17	7	RPL9,RPL7,RPL27,RPS14,RPS29,RPS6KA1,RPS6KA3	10	RPL10A,RPL3,RPL12,RPL35,RPL6,RPL19,RPS15,RPS17,RPS25,RPS26	1954-08-01	0.000000
Glioblastoma signaling pathways	16	12	PIK3C2B,PDPK1,PIK3CD,ERBB2,KRAS,PRKCH,PLCG2,MAP2K7,CDKN1A,MDM2,BRCA1,BRCA2	4	MIR21,RAF1,MAP2K5,CDK4	1999-07-01	0.000000
miR-targeted genes in squamous cell	22	5	NRP1,FNDC3B,ADAR,GFPT1,MIR155	17	GOLGA7,GALNT7,RAB34,BET1,POLR2C,ANXA2,SDCBP,PPP1R7,MOV10,ATP6V1F,DHX40,RTN4,CHMP2A,RHEB,RARS,MIR21,MIR196B	1993-07-01	0.000000
EGF/EGFR signaling pathway	22	15	ELK4,KRAS,SP1,RPS6KA3,VAV2,GAB2,CDC42,ASAP1,ERBB2,RPS6KA1,PDPK1,PTPN11,CRKL,PIK3C2B,CBLB	7	ATF1,RAF1,STAMBP,ROCK1,MAP2K5,PAK1,AP2M1	1983-07-01	0.000000
Genes related to primary cilium development (based on CRISPR)	17	3	TXNDC15,IFT172,TMEM107	14	BBS2,IFT52,IFT74,CEP192,IFT46,CBY1,BBS9,TTC8,LZTFL1,KIFAP3,TRAPPC11,WDR19,TUBD1,CEP162	1973-07-01	0.000000
PI3K-Akt signaling pathway	33	14	COL6A3,DDIT4,IL6R,IL4R,PIK3CD,ITGA4,ANGPT1,GNB4,KRAS,PDPK1,MDM2,CDKN1A,BCL2,BRCA1	19	CCNE2,IL7R,EFNA4,PRL,GNG5,RHEB,PPP2CB,PPP2R2A,PPP2R5A,HSP90B1,RAF1,CREB3,ATF4,CD19,TLR4,FLT3,CDK4,G6PC3,SGK3	1958-07-01	0.000000
DNA damage response	14	6	CDKN1A,MDM2,H2AFX,FANCD2,BAX,BRCA1	8	CASP3,BID,GADD45A,CYCS,CDK5,PMAIP1,CDK4,CCNE2	1952-07-01	0.000000
Mitochondrial complex I assembly model OXPHOS system	13	2	NDUFA1,NDUFA13	11	NDUFB9,NDUFAF2,TIMMDC1,NDUFAF3,NDUFA6,NDUFA3,NDUFA2,NDUFC2,NDUFAF1,NDUFS8,NDUFAF4	1931-07-01	0.000000
Amino acid metabolism	16	2	DLST,ACSS1	14	EPRS,DLD,FAH,IARS,ADH5,FARSB,ASNS,ALDH7A1,SUCLG1,HMGCL,MUT,GLUL,RARS,SRM	2026-07-01	0.000000
Host-pathogen interaction of human coronaviruses - autophagy	8	0		8	ULK1,PIK3R4,PIK3C3,WIPI1,ATG10,ATG12,ATG3,ATG4A	2020-07-01	0.000000
Fatty acid beta-oxidation	10	1	CPT1A	9	HADHA,HADHB,ACADVL,ACSL5,DLD,ACSL1,DECR1,LIPC,ACSL4	2023-12-07	0.000000
Cholesterol metabolism	14	9	SORT1,LDLR,CYP51A1,DHCR24,TSPO,MYLIP,HMGCS1,MVD,LSS	5	LRPAP1,LIPC,NSDHL,IDI1,FDFT1	2023-11-07	0.000000
WikiPathways Academy: met-1-last	7	4	HMGCS1,MVD,CYP51A1,LSS	3	NSDHL,IDI1,FDFT1	7.00	0.000000
WikiPathways Academy: met-1-last	7	4	HMGCS1,MVD,CYP51A1,LSS	3	NSDHL,IDI1,FDFT1	7.00	0.000000
WikiPathways Academy: met-1-last	7	4	HMGCS1,MVD,CYP51A1,LSS	3	NSDHL,IDI1,FDFT1	7.00	0.000000
Neurodegeneration with brain iron accumulation (NBIA) subtypes pathway	11	1	ATG2A	10	PIK3C3,ATG10,RHEB,ULK1,ATG12,PIK3R4,WIPI1,ATG101,ATG3,FTL	1996-06-01	0.000000
WikiPathways Academy: wp-publish test	7	4	HMGCS1,MVD,CYP51A1,LSS	3	NSDHL,IDI1,FDFT1	1974-06-01	0.000000
Cholesterol biosynthesis pathway	7	4	HMGCS1,MVD,CYP51A1,LSS	3	NSDHL,IDI1,FDFT1	1974-06-01	0.000000
Histone modifications	13	13	HIST1H3J,HIST2H3A,HIST2H3C,DOT1L,EED,HIST1H4I,HIST1H3G,HIST1H3H,HIST1H4L,HIST1H3A,HIST1H3B,HIST1H4D,HIST1H4A	0		1971-06-01	0.000000
Metallothioneins bind metals	8	0		8	MT1B,MT1G,MT1F,MT1A,MT1H,MT1M,MT2A,MT1E	1961-06-01	0.000000
TNF-alpha signaling pathway	15	4	KRAS,MAP2K7,BAX,FBXW11	11	GLUL,TRADD,DIABLO,RAF1,BID,TANK,BIRC2,CASP7,CASP3,RFK,NSMAF	1953-06-01	0.000000
Cell cycle	17	3	CDKN1A,MDM2,YWHAG	14	CDK7,MAD2L2,CCNE2,GADD45A,WEE1,CDK4,MCM6,ORC3,ORC4,E2F5,ANAPC13,ANAPC4,ANAPC5,CDC23	1942-06-01	0.000000
Cholesterol biosynthesis pathway in hepatocytes	16	8	LSS,CYP51A1,DHCR24,HMGCS1,MVD,FADS1,SCD,MYLIP	8	GGPS1,FDFT1,NSDHL,IDI1,ACSL1,ACSL4,ACOT1,ACOT2	2027-06-01	0.000001
Focal adhesion: PI3K-Akt-mTOR-signaling pathway	28	14	ITGAE,ITGB2,DDIT4,IL6R,IL4R,PIK3CD,ITGA4,ANGPT1,GNB4,KRAS,PDPK1,MDM2,CDKN1A,PIK3C2B	14	IL7R,PIK3R4,EFNA4,PRL,GNG5,RHEB,ULK1,PPP2CB,PPP2R5A,HSP90B1,RAF1,CREB3,ATF4,RAB10	2014-06-01	0.000001
Androgen receptor network in prostate cancer	16	7	BRCA1,BCL2,BAX,MDM2,SP1,PTPN11,CRKL	9	MIR21,HSD17B4,ATF1,BLM,CASP3,ACTL6A,RAF1,PAK1,RHEB	2013-06-01	0.000001
Cholesterol synthesis disorders	7	5	HMGCS1,MVD,DHCR24,CYP51A1,LSS	2	FDFT1,IDI1	2023-08-06	0.000001
Fas ligand pathway and stress induction of heat shock proteins	10	3	LMNB1,LMNB2,BCL2	7	FAF1,CASP7,RIPK2,PAK1,ARHGDIB,CYCS,CASP3	2023-07-06	0.000001
7q11.23 copy number variation syndrome	16	4	RN7SL265P,MIR590,DLST,HDAC6	12	SMARCA5,ATPAF2,ATP5D,ATF4,SQSTM1,RFC2,TSG101,DLD,UBE2L6,ULK1,VPS28,VPS37A	2023-02-06	0.000001
Malignant pleural mesothelioma	36	19	EED,MCU,CD44,BRCA1,BCL2,BAX,SP1,CDKN1A,MDM2,RPS6KA1,ITGA4,ITGB2,SLC7A5,ANGPT1,LRP6,CTBP1,PIK3CD,MAP2K7,RPS6KA3	17	CYCS,LGALS9,SLC3A2,SERPINF1,CDK4,CDK7,RHEB,ULK1,PAK1,MMP14,PRKAG1,FLT3,EFNA4,STK3,RYK,CTBP2,MDK	1996-05-01	0.000001
FBXL10 enhancement of MAP/ERK signaling in diffuse large B-cell lymphoma	9	9	EED,HIST1H3J,HIST2H3A,HIST2H3C,HIST1H3G,HIST1H3H,HIST1H3A,HIST1H3B,H2AFX	0		1991-05-01	0.000001
DNA damage response (only ATM dependent)	15	10	CDC42,PIK3CD,BCL2,BAX,ERBB2,MDM2,KRAS,LDLR,CDKN1A,PIK3C2B	5	PIK3C3,PIK3R4,CAT,PMAIP1,SCP2	1989-05-01	0.000001
Smith-Magenis and Potocki-Lupski syndrome copy number variation	21	4	BAX,snoU13,IFT172,ETV5	17	CRY1,TLR4,WDR41,PEMT,ATPAF2,ROCK1,BIRC2,ULK1,ATG101,RAB10,IFT74,IFT22,IFT46,IFT52,RANBP9,COPS8,COPS2	1987-05-01	0.000001
Mevalonate arm of cholesterol biosynthesis pathway	6	2	HMGCS1,MVD	4	FDFT1,HMGCL,IDI1,GGPS1	1980-05-01	0.000002
miR-targeted genes in leukocytes	19	7	FADS1,FADS3,ADAR,LMNB2,PPP2R4,BCL2,MIR155	12	ATP6V1F,IFRD1,POLR2C,RAB34,CDK5RAP1,MLLT11,PPIF,RTN4,ANXA2,CSRP1,GOLGA7,MATR3	1978-05-01	0.000002
Gastrin signaling pathway	16	8	SP1,CDC42,CD44,PTPN11,PRKCH,CDKN1A,KRAS,ARRB1	8	ROCK1,LAMTOR3,PAK1,TCF4,CASP3,RAF1,BIRC2,ANXA2	1973-05-01	0.000002
Enterocyte cholesterol metabolism	9	6	HMGCS1,MVD,LSS,DHCR24,CYP51A1,LDLR	3	IDI1,FDFT1,NSDHL	1969-05-01	0.000002
Focal adhesion	21	12	ZYX,ITGA4,PDPK1,ERBB2,BCL2,CRKL,CDC42,XIAP,ACTN4,PIK3CD,ACTN1,VAV2	9	CAPN2,ROCK1,PPP1R12A,RAF1,BLK,BIRC2,PAK1,MYL12A,MYL12B	1969-05-01	0.000002
DNA IR-double strand breaks and cellular response via ATM	11	5	BAX,MDM2,BRCA2,BRCA1,FANCD2	6	STK3,ACTL6A,CDK5,BLM,BID,CASP3	1967-05-01	0.000002
Ebola virus infection in host	17	7	ITGA4,CDC42,VAV2,PIK3CD,GSN,ACTN1,ACTN4	10	CTSB,TLR4,TSG101,PAK1,HLA-DMA,HLA-DPA1,HLA-DPB1,HLA-DQA1,HLA-DRA,HLA-DRB1	1961-05-01	0.000002
Exercise-induced circadian regulation	10	1	ETV6	9	ZFR,SUMO1,CRY1,PPP2CB,NCOA4,HLA-DMA,DNAJA1,GSTP1,IDI1	1960-05-01	0.000003
Non-small cell lung cancer	12	6	KRAS,CDKN1A,ERBB2,PLCG2,PIK3CD,BAX	6	CDK4,RAF1,GADD45A,BID,CASP3,CYCS	1957-05-01	0.000003
miRNA regulation of DNA damage response	14	6	CDKN1A,FANCD2,BRCA1,MDM2,BAX,H2AFX	8	GADD45A,BID,CDK5,PMAIP1,CCNE2,CASP3,CDK4,CYCS	1949-05-01	0.000003
mRNA processing	16	6	SNRPD2,DICER1,PABPN1,U2AF2,SNRPE,SNRPG	10	DNAJC8,SPOP,SNRPB2,DDX1,SRP54,METTL3,CPSF1,CSTF2,NONO,DHX15	1945-05-01	0.000004
11p11.2 copy number variation syndrome	18	7	ITGB2,RPS29,LONRF3,CDKN1A,NEK9,ITGA4,ATXN1	11	CD9,DDX39A,HLA-DRA,HLA-DPB1,HLA-DMA,ANXA7,BIRC2,CD19,CREB3,PFDN1,CHCHD2P9	1941-05-01	0.000004
Methionine de novo and salvage pathway	7	2	AHCY,MTR	5	MAT2B,MSRB2,SRM,ADI1,ENOPH1	1940-05-01	0.000004
NRF2 pathway	17	1	SLC39A7	16	GCLC,MGST3,NFE2L2,CBR1,GSTP1,PRDX6,GSTA4,NQO1,SQSTM1,FTL,GSTM5,GSTM1,GSTM2,GSTM4,SLC39A4,SLC39A14	1940-05-01	0.000004
Fatty acid biosynthesis	7	1	SCD	6	ACSL5,ECHDC1,ACSL4,ACSL1,DECR1,ECH1	2026-05-01	0.000006
Retinoblastoma gene in cancer	13	4	MDM2,CDKN1A,RPA3,DHFR	9	RAF1,FAF1,RFC4,CCNE2,MCM6,CDK4,MIR21,POLE2,WEE1	2020-05-01	0.000006
G1 to S cell cycle control	11	3	CDKN1A,MDM2,RPA3	8	CDK4,CDK7,CREB3,MCM6,POLE2,WEE1,GADD45A,CCNE2	2017-05-01	0.000007
WikiPathways Academy: met-1-indirect	5	3	HMGCS1,MVD,LSS	2	IDI1,FDFT1	2023-12-05	0.000008
WikiPathways Academy: met-1-indirect	5	3	HMGCS1,MVD,LSS	2	IDI1,FDFT1	2023-12-05	0.000008
Apoptosis modulation and signaling	16	3	BAX,XIAP,BCL2	13	AIFM1,TRADD,CASP3,CASP4,BLK,CYCS,BID,CASP7,PTPN13,HTRA2,DIABLO,BIRC2,PMAIP1	2023-11-05	0.000008
Chemokine signaling pathway	18	12	CRKL,VAV2,CDC42,PREX1,RASGRP2,PIK3CD,PRKX,KRAS,PLCB2,TIAM2,GNB4,ARRB1	6	RAF1,GNG5,PAK1,CXCR4,ROCK1,ELMO1	2023-11-05	0.000008
Angiogenesis overview	11	8	DAG1,CDC42,PDPK1,NRP1,PTPN11,PIK3CD,VHL,ANGPT1	3	RAF1,PAK1,MMP14	2023-10-05	0.000008
Class I MHC mediated antigen processing and presentation	1	1	TAPBP	0		2023-10-05	0.000008
T-cell receptor signaling pathway	13	9	CBLB,CDC42,SH2B3,GAB2,PTPN11,NFATC2,PDPK1,CRKL,TNFRSF9	4	PAK1,RAF1,MALT1,RIPK2	2023-09-05	0.000008
ErbB signaling pathway	13	10	PLCG2,MDM2,ERBB2,CDKN1A,PDPK1,KRAS,MAP2K7,CBLB,CRKL,PIK3CD	3	MIR21,PAK1,RAF1	2023-09-05	0.000008
Hepatitis B infection	17	7	CDKN1A,PIK3CD,BCL2,BAX,NFATC2,KRAS,MAP2K7	10	CREB3,BID,CASP3,CYCS,TYK2,VDAC3,RAF1,ATF4,TLR4,TLR3	2023-07-05	0.000008
JAK/STAT pathway	14	7	MDM2,RPS6KA1,VAV2,PTPN11,BAX,CDC42,SP1	7	PDE3B,PRL,PAK1,PPIA,RAF1,SOCS2,ROCK1	2023-04-05	0.000009
Interleukin-11 signaling pathway	9	5	PPP2R4,PTPN11,RPS6KA1,BCL2,PDPK1	4	RAF1,ATF1,BGLAP,TYK2	2023-03-05	0.000009
Mitochondrial long chain fatty acid beta-oxidation	6	1	CPT1A	5	ACSL4,SCP2,ACSL1,HADHA,ACADVL	5.00	0.000010
Acute viral myocarditis	13	4	BAX,ITGB2,BCL2,EIF4G1	9	CASP7,TLR3,CYCS,CD55,HLA-DMA,TLR4,CXCR4,CASP3,PABPC1	1984-04-01	0.000015
Interactions between LOXL4 and oxidative stress pathway	6	1	NRF1	5	NQO1,NFE2L2,EXOC6,ANXA5,IGFBP7	1983-04-01	0.000015
Pyrimidine metabolism	16	1	POLR1A	15	NUDT2,CTPS1,ENTPD4,DCTPP1,PNP,NT5E,POLR2K,POLR1C,POLR2B,POLR2C,POLR2H,POLR2L,POLR2I,POLD4,POLE2	1979-04-01	0.000016
MET in type 1 papillary renal cell carcinoma	10	7	KRAS,CRKL,PTPN11,CDC42,PIK3CD,ETS1,CDKN1A	3	RAF1,PAK1,PRCC	1976-04-01	0.000018
Photodynamic therapy-induced unfolded protein response	7	0		7	XBP1,NFE2L2,ATF4,HSP90B1,ERP27,ASNS,NARS	1975-04-01	0.000018
PodNet: protein-protein interactions in the podocyte	25	15	PIK3CD,NOTCH2,SMURF1,ANGPT1,DICER1,MYH10,CDKN1A,JUP,ACTN4,SP1,CDC42,DAG1,NRP1,VAV2,BCL2	10	TSG101,ARPC5,RAB4B,PSENEN,IGFBP7,ARPC2,PAK1,IGFBP2,CDK5,PALLD	1968-04-01	0.000021
Insulin signaling	17	10	PIK3CD,PRKCH,SRF,RPS6KA3,MAP2K7,PFKL,RPS6KA1,CBLB,PTPN11,PDPK1	7	PIK3C3,RHEB,XBP1,STXBP3,PIK3R4,RAF1,MAP2K5	1967-04-01	0.000021
Apoptosis	12	3	MDM2,BAX,BCL2	9	PMAIP1,BIRC2,DIABLO,CASP4,CASP3,BID,CYCS,CASP7,TRADD	1964-04-01	0.000023
Phosphoinositides metabolism	9	5	PLCB2,PIP4K2B,PIK3CD,PLCG2,MTMR12	4	MTMR2,MTMR9,PIK3C3,PIK3R4	1963-04-01	0.000024
Oxidative phosphorylation	10	3	ATP5G3,ATP5I,ND6	7	ATP5D,ATP5G1,NDUFA2,NDUFS8,ATP5J,ATP6AP2,ATP5J2	1956-04-01	0.000028
Head and neck squamous cell carcinoma	11	6	DDIT4,CDKN1A,KRAS,NOTCH2,PDPK1,ERBB2	5	BIRC2,RHEB,CDK4,CUL3,NFE2L2	1955-04-01	0.000028
8p23.1 copy number variation syndrome	8	0		8	MTMR9,TLR4,BLK,FDFT1,CTSB,ERI1,PINX1,SLBP	1954-04-01	0.000029
Androgen receptor signaling pathway	12	6	CDC42,CDKN1A,MDM2,SP1,ETV5,BRCA1	6	PSMC3IP,SUMO1,ROCK1,TGIF1,RNF14,NCOA4	1954-04-01	0.000029
Clock-controlled autophagy in bone metabolism	12	2	SEMA4D,BCL2	10	CRY1,ULK1,ATG12,PIK3C3,ATG101,BMPR2,SERPINF1,ATG10,SQSTM1,ATG3	1949-04-01	0.000033
Regulation of actin cytoskeleton	16	8	PIP5K1B,GSN,MYH10,SSH2,CDC42,KRAS,ACTN1,PIK3CD	8	PAK1,PIK3C3,ARPC5,ROCK1,PPP1R12A,RRAS2,PIK3R4,RAF1	1949-04-01	0.000033
Host-pathogen interaction of human coronaviruses - MAPK signaling	8	4	MAP2K7,RPS6KA3,BCL2,RPS6KA1	4	RAF1,IFITM2,IFITM3,IFITM1	1945-04-01	0.000035
Genotoxicity pathway	10	7	RBM12B,CDKN1A,HIST1H2BI,AEN,MDM2,CBLB,RPS27L	3	USP41,GADD45A,TRIM22	1944-04-01	0.000037
Vitamin D receptor pathway	18	8	LPGAT1,NRIP1,ADGRE5,MYO9B,S100A4,SALL4,CDKN1A,NFATC2	10	HLA-DRB1,HLA-DQA1,SLC34A2,BGLAP,SATB1,NINJ1,CD9,LGALS9,GADD45A,CCNC	1943-04-01	0.000037
Autophagy	7	0		7	PIK3R4,PRKAG1,PIK3C3,ATG3,ULK1,ATG101,ATG12	1942-04-01	0.000038
Mitochondrial fatty acid oxidation disorders	6	1	CPT1A	5	SCP2,HADHA,ACSL4,ACSL1,ACADVL	1940-04-01	0.000040
Extrafollicular and follicular B cell activation by SARS-CoV-2	11	3	CD22,NEAT1,ETS1	8	IFITM1,BLNK,XBP1,CD19,TLR7,TLR4,CXCR4,SELL	1939-04-01	0.000041
Apoptosis-related network due to altered Notch3 in ovarian cancer	9	2	CDKN1A,ETS1	7	SQSTM1,RIPK2,ANXA5,NQO1,GCLC,CASP7,IL7R	1934-04-01	0.000045
Measles virus infection	15	5	CBLB,ADAR,BAX,BCL2,PIK3CD	10	TLR7,OAS1,TRADD,BID,CYCS,TLR4,TYK2,CASP3,CDK4,CCNE2	1934-04-01	0.000046
Ethanol effects on histone modifications	7	5	AHCY,DHFR,MTR,SLC19A1,HDAC6	2	ELP3,HAT1	1932-04-01	0.000047
Axon Guidance	13	6	NRP1,PTCH1,PDPK1,CDC42,PTPN11,NFATC2	7	CDK5,RAF1,RYK,BMPR2,ROCK1,MYL12B,CXCR4	2029-04-01	0.000051
Metabolic reprogramming in pancreatic cancer	8	6	PFKL,HK2,KRAS,GFPT1,LDLR,SLC7A5	2	SLC16A4,DLD	2029-04-01	0.000051
Hedgehog signaling pathway	8	5	ARRB1,PTCH1,CSNK1G1,SMURF1,BCL2	3	CSNK1G3,SPOP,CUL3	2029-04-01	0.000051
Complement system in neuronal development and plasticity	13	4	XIAP,BAX,ITGB2,ATP10A	9	HTRA2,DIABLO,CASP7,CYCS,BID,CD55,ATP11C,CASP3,CD59	2029-04-01	0.000051
MAPK signaling pathway	21	11	SRF,RPS6KA3,ELK4,ARRB1,PTPN7,CRKL,CDC42,RASGRP2,MAP2K7,PPP3R1,KRAS	10	PPP3CC,CASP3,GADD45A,MAP2K5,ATF4,PPM1B,RRAS2,STK3,RAF1,PAK1	2028-04-01	0.000053
miRNA regulation of p53 pathway in prostate cancer	7	4	MIR4482,MDM2,BAX,ZMAT3	3	PMAIP1,BID,CASP3	2023-04-01	0.000059
Melanoma	10	6	KRAS,ETS1,MDM2,PIK3CD,CDKN1A,BAX	4	PAK1,RAF1,GADD45A,CDK4	2015-04-01	0.000071
Hepatitis C and hepatocellular carcinoma	9	7	VAV2,PTPN11,IL6R,BRCA1,CD44,CDKN1A,MIR155	2	CASP3,CASP7	2015-04-01	0.000071
Alstrom syndrome	7	3	IFT172,PTCH1,ACTN4	4	NSFL1C,CEP192,IFT74,BLOC1S1	2014-04-01	0.000073
TP53 network	7	4	CDKN1A,BAX,BCL2,MDM2	3	BID,PMAIP1,GADD45A	2014-04-01	0.000073
Male infertility	15	9	BCL2,BRCA2,CHD2,ETV5,MDM2,MTR,CCNT1,HIST1H4A,AGO2	6	CAT,HLA-DRA,NFE2L2,NQO1,PEMT,POLB	2013-04-01	0.000075
Brain-derived neurotrophic factor (BDNF) signaling pathway	15	7	PTPN11,SORT1,VAV2,CDC42,PDPK1,RPS6KA3,RPS6KA1	8	CYFIP1,SQSTM1,RANBP9,CAMK4,RAF1,CDK5,CASP3,MAP2K5	2023-09-04	0.000081
Wnt signaling pathway and pluripotency	12	8	CTBP1,RACGAP1,FBXW2,LRP6,LDLR,PRKCH,CD44,PPP2R4	4	PPP2CB,CTBP2,PPP2R2A,CTNND1	1999-03-01	0.000102
Integrin-mediated cell adhesion	12	7	CDC42,PDPK1,VAV2,ZYX,ITGA4,ITGAE,ITGB2	5	RAF1,ROCK1,CAPN2,MAP2K5,PAK1	1999-03-01	0.000102
Parkinson's disease pathway	10	1	UBE2G2	9	EPRS,SNCA,HTRA2,CYCS,UBE2L3,UBE2L6,CCNE2,CASP7,CASP3	1999-03-01	0.000103
Ciliopathies	17	3	NEK9,TMEM107,IFT172	14	PIK3R4,DDX59,ATXN10,POC1B,TMEM138,DNAH6,ARMC4,UNC119,BBS2,WDR19,LZTFL1,TTC8,BBS9,IFT52	1997-03-01	0.000106
Nucleotide excision repair in xeroderma pigmentosum	9	4	BRCA1,RPA3,SLX4IP,POLH	5	POLD4,POLE2,RFC2,RFC4,CETN2	1997-03-01	0.000108
Mitochondrial complex IV assembly	7	3	COX6C,COX18,PNKD	4	HIGD1A,COX6B1,COA3,COX20	1996-03-01	0.000109
Olfactory receptor activity	1	1	OR5H6	0		1996-03-01	0.000109
Unfolded protein response	6	1	BCL2	5	NFE2L2,PMAIP1,ATF4,XBP1,BID	1994-03-01	0.000116
22q11.2 copy number variation syndrome	15	8	RANGAP1,BCL2,TNPO1,HIST1H4A,CBX5,CRKL,SRF,CDC42	7	CUL3,RTN4,MALT1,RAF1,RANBP1,MRPL40,USP41	1986-03-01	0.000137
Pancreatic adenocarcinoma pathway	11	7	KRAS,CDC42,PIK3CD,ERBB2,BRCA2,CDKN1A,BAX	4	PAK1,RAF1,GADD45A,CDK4	1986-03-01	0.000138
Fragile X syndrome	13	7	EIF4G1,CPT1A,PTPN11,AGO2,DICER1,DAG1,KRAS	6	CAMK4,AP2M1,CYFIP1,RAF1,RHEB,EIF4A1	1986-03-01	0.000139
Cholesterol biosynthesis	6	4	CYP51A1,HMGCS1,DHCR24,LSS	2	NSDHL,ARV1	1983-03-01	0.000147
Mesodermal commitment pathway	15	5	ELK4,ARID5B,TOX,SRF,JARID2	10	PBX3,CSRP2,BMPR2,MACF1,ELP4,C9orf72,TCF4,NFE2L2,UBR5,CTBP2	1983-03-01	0.000148
2q37 copy number variation syndrome	16	7	GMEB1,RAB17,HDLBP,COL6A3,CYTH1,RNA5SP122,DGKD	9	GABARAP,MYEOV2,CXCR4,RAB27A,PRL,THAP4,COPS8,RPL3P5,PPP1R7	1981-03-01	0.000155
Rett syndrome causing genes	8	4	TAF1B,TBL1X,GABBR2,CHD4	4	EIF2B2,TCF4,IMPDH2,RHOBTB2	1980-03-01	0.000159
Aryl hydrocarbon receptor pathway	8	3	NRIP1,CDKN1A,KRAS	5	NQO1,AIP,NFE2L2,RAF1,GCLC	1980-03-01	0.000159
Joubert syndrome	10	1	PCNT	9	ATF4,TMEM138,PCM1,BBS9,RHEB,UNC119,TTC8,CETN2,BBS2	1979-03-01	0.000163
Myometrial relaxation and contraction pathways	15	10	PRKCH,CNN2,PRKAR2A,PLCG2,GNB4,GABPB2,SP1,ARRB1,YWHAG,PDE4B	5	ATF4,ATF1,IGFBP2,GNG5,CREB3	1977-03-01	0.000171
Prolactin signaling pathway	10	4	GAB2,VAV2,PTPN11,YWHAG	6	PRL,CASP3,PAK1,SOCS2,PPIA,RAF1	1974-03-01	0.000181
Translation factors	8	1	EIF4G1	7	EIF2B2,EIF2B4,EIF4A1,PAIP1,EEF1D,PABPC1,EIF5B	1973-03-01	0.000184
G protein signaling pathways	11	8	AKAP1,GNA11,PRKCH,PRKAR2A,GNA15,AKAP11,PDE4B,KRAS	3	PPP3CC,GNAZ,GNG5	1973-03-01	0.000186
Leptin signaling pathway	10	6	PLCG2,SP1,PTPN11,ERBB2,BAX,CDC42	4	RAF1,SOCS2,PDE3B,ROCK1	1969-03-01	0.000202
Metabolic Epilepsies	11	5	SLC25A15,PFKP,PFKL,ENO1,HK2	6	SPCS1,ETHE1,ALDH7A1,DLD,FBP1,MOCS2	1969-03-01	0.000205
TCA cycle (aka Krebs or citric acid cycle)	5	1	DLST	4	SUCLG1,IDH3G,SDHB,DLD	1968-03-01	0.000208
Ectoderm differentiation	14	6	CTBP1,JUP,EDA2R,SMURF1,TBL1X,HDAC6	8	WDR44,CAP2,SOCS2,SNCA,ARHGAP15,SDCBP,TSC22D1,PTPN13	1967-03-01	0.000214
Deubiquitination	2	1	YOD1	1	STAMBP	1961-03-01	0.000246
Oxidative damage response	7	3	BCL2,CDC42,CDKN1A	4	TDP2,CYCS,GADD45A,CASP3	1958-03-01	0.000261
Small cell lung cancer	11	4	CDKN1A,BAX,BCL2,PIK3CD	7	BID,GADD45A,CYCS,CASP3,CCNE2,CDK4,BIRC2	1957-03-01	0.000271
Endothelin pathway	21	6	ARRB1,FNDC3B,GSN,BCL2,DAG1,RPS6KA3	15	DNAJC12,ARL6IP5,DNAJC10,EIF5B,MYO1B,NQO1,PPP1R12A,ANXA7,MYL12B,CREG1,PAK1,ATF1,CTNND1,TCF4,MMP14	1956-03-01	0.000273
Nucleotide metabolism	5	1	DHFR	4	OAZ1,POLB,ADSL,SRM	1956-03-01	0.000275
p53 transcriptional gene network	11	7	DDIT4,BAX,CDKN1A,ZMAT3,FANCC,POLH,DRAM1	4	PRKAG1,PMAIP1,GADD45A,ULK1	1949-03-01	0.000325
PPAR signaling pathway	9	4	SCD,CPT1A,FABP5,PDPK1	5	ACSL4,SLC27A2,ACSL5,ACSL1,SCP2	1949-03-01	0.000327
Ras signaling	16	11	GNB4,PLCG2,RASGRP2,GAB2,PTPN11,KRAS,RASA3,ETS1,RGL2,CDC42,PIK3CD	5	FLT3,GNG5,RRAS2,PAK1,RAF1	1948-03-01	0.000334
Autophagy in pancreatic ductal adenocarcinoma	5	2	KRAS,MDM2	3	NFE2L2,SQSTM1,VMP1	1945-03-01	0.000357
DNA replication	7	1	RPA3	6	RFC4,UBC,POLD4,MCM6,POLE2,RFC2	1945-03-01	0.000358
2q13 copy number variation syndrome	9	4	CKAP2L,TTL,POLR1A,PLCG2	5	RPL5P9,POLR2L,POLR2K,POLR2H,POLR1C	1939-03-01	0.000407
Trans-sulfuration, one-carbon metabolism and related pathways	6	4	AHCY,DHFR,MTHFD1L,MTR	2	MAT2B,GCLC	1939-03-01	0.000409
EGFR tyrosine kinase inhibitor resistance	10	8	KRAS,BAX,IL6R,ERBB2,PDPK1,PLCG2,BCL2,PIK3CD	2	RAF1,RRAS2	1939-03-01	0.000410
Nucleotide excision repair	7	1	RPA3	6	CDK7,POLD4,POLE2,RFC2,RFC4,CETN2	1938-03-01	0.000415
Metapathway biotransformation Phase I and II	16	1	CYP51A1	15	GSTA4,NAT1,TPMT,GSTM4,GSTM2,AKR1C3,GSTK1,GSTM5,GPX4,CYP2R1,GSTM1,SULT1A4,SULT1A3,GSTP1,MGST3	1937-03-01	0.000424
TGF-beta signaling pathway	13	6	SP1,CDKN1A,SMURF1,PRKAR2A,CDC42,ETS1	7	E2F5,PJA1,TGIF1,RAF1,SNW1,SUMO1,ROCK1	1935-03-01	0.000445
Clear cell renal cell carcinoma pathways	10	6	VHL,PBRM1,HK2,PFKL,PFKP,ENO1	4	SQSTM1,MIR21,RHEB,SSPN	1931-03-01	0.000495
Bardet-Biedl syndrome	10	3	IFT172,PTCH1,TMEM107	7	IFT74,BBS9,BBS2,TTC8,LZTFL1,WDR19,IFT52	2027-03-01	0.000543
Chromosomal and microsatellite instability in colorectal cancer	9	4	CDKN1A,KRAS,BAX,BCL2	5	CYCS,CASP3,PMAIP1,RAF1,GADD45A	2025-03-01	0.000558
Parkin-ubiquitin proteasomal system pathway	9	3	TUBA4A,UBE2G2,PSMC6	6	PSMD10,PSMC4,PSMC2,PSMD7,PSMD4,PSMD13	2025-03-01	0.000558
Class A/1 (rhodopsin-like receptors)	4	3	HRH4,S1PR1,P2RY11	1	GPR18	2025-03-01	0.000564
17p13.3 (YWHAE) copy number variation	5	1	YWHAG	4	CDK5,DCTN2,DCTN3,DCTN6	2024-03-01	0.000575
Mitochondrial fatty acid synthesis and respiration	4	3	FIS1,BAX,BCL2	1	MFN1	2022-03-01	0.000608
exRNA mechanism of action and biogenesis	3	2	DICER1,AGO2	1	ERI1	2021-03-01	0.000620
Prostaglandin synthesis and regulation	7	1	ANXA6	6	ANXA5,PRL,TBXAS1,ANXA2,AKR1C3,CBR1	2020-03-01	0.000634
Nanoparticle triggered autophagic cell death	5	0		5	VMP1,ATG10,ULK1,ATG3,ATG12	2015-03-01	0.000715
Thermogenesis	11	4	RPS6KA1,CPT1A,RPS6KA3,KRAS	7	RHEB,CREB3,ACSL1,ACTL6A,ACSL4,ACSL5,PRKAG1	2013-03-01	0.000747
Generic transcription pathway	4	1	MED16	3	SNW1,CCNC,CDK8	2023-12-03	0.000752
Omega-9 fatty acid synthesis	4	1	FADS1	3	ACSL1,ACSL4,ACOT2	2023-08-03	0.000829
Omega-3 / omega-6 fatty acid synthesis	4	1	FADS1	3	ACSL1,ACSL4,ACOT2	2023-08-03	0.000829
T-cell activation SARS-CoV-2	10	4	PDPK1,CDKN1A,PIK3CD,BAX	6	HLA-DRA,HLA-DRB1,RAF1,RHEB,MALT1,TYK2	2023-08-03	0.000841
Endoderm differentiation	13	4	KDM4A,JARID2,ELK4,TOX	9	UBR5,LRPPRC,LEO1,CTBP2,PABPC1,MAD2L2,PBX3,ELP4,TCF4	2023-06-03	0.000875
DNA mismatch repair	5	1	RPA3	4	POLD4,RFC2,RFC4,POLE2	2023-06-03	0.000879
Endometrial cancer	8	6	KRAS,PIK3CD,PDPK1,ERBB2,BAX,CDKN1A	2	RAF1,GADD45A	2023-04-03	0.000918
Target of rapamycin signaling	6	2	DDIT4,CDC42	4	ULK1,RHEB,PRKAG1,IDI1	2023-03-03	0.000942
Circadian rhythm genes	16	7	AHCY,GFPT1,DYRK1A,GNA11,FBXW11,NRIP1,CPT1A	9	CDK4,METTL3,MAGED1,OPN3,ATF4,NONO,CRY1,RBM4B,UBC	1999-02-01	0.001024
Cholesterol biosynthesis with skeletal dysplasias	3	2	DHCR24,CYP51A1	1	NSDHL	1997-02-01	0.001059
mRNA, protein, and metabolite inducation pathway by cyclosporin A	3	1	SLC7A5	2	SLC3A2,ATF4	1997-02-01	0.001059
S1P receptor signal transduction	5	4	S1PR1,PLCB2,PIK3C2B,RACGAP1	1	ASAH1	1997-02-01	0.001070
Photodynamic therapy-induced HIF-1 survival signaling	6	3	PFKL,ANGPT1,BAX	3	IGFBP2,BID,PMAIP1	1996-02-01	0.001094
H19 action Rb-E2F1 signaling and CDK-Beta-catenin activity	4	0		4	CDK4,CDK8,CSRP2,PMAIP1	1996-02-01	0.001102
Non-genomic actions of 1,25 dihydroxyvitamin D3	13	8	PLCB2,PRKCH,PIK3CD,PIK3C2B,PLCG2,ETS1,SP1,KRAS	5	PIK3R4,OAS1,PIK3C3,TLR4,TYK2	1992-02-01	0.001192
Wnt signaling pathway	7	5	LRP6,CSNK1G1,CTBP1,PIP5K1B,NFATC2	2	RYK,TCF4	1992-02-01	0.001194
Oncostatin M signaling pathway	8	4	KRAS,PRKCH,PTPN11,LDLR	4	TYK2,CASP3,RAF1,CASP7	1990-02-01	0.001251
Amyotrophic lateral sclerosis (ALS)	6	2	BCL2,BAX	4	CAT,PPP3CC,CASP3,BID	1990-02-01	0.001264
Endoplasmic reticulum stress response in coronavirus infection	7	3	BCL2,PPP1R16B,PPP1R15B	4	XBP1,ATF4,PPP1R7,PPP1R12A	1987-02-01	0.001341
Mitochondrial complex III assembly	4	1	LYRM7	3	UQCRC2,UQCRC1,BCS1L	1984-02-01	0.001432
Spinal cord injury	11	4	MIF,CSPG4,CDC42,ZFP36	7	APEX1,TLR4,RTN4,CDK4,E2F5,GADD45A,CASP3	1984-02-01	0.001447
Kisspeptin/kisspeptin receptor system in the ovary	6	5	PLCB2,PIK3CD,PRKCH,ARRB1,KRAS	1	RAF1	1984-02-01	0.001454
Breast cancer pathway	13	10	ERBB2,BRCA1,KRAS,PIK3CD,NOTCH2,LRP6,CDKN1A,BRCA2,BAX,SP1	3	CDK4,RAF1,GADD45A	1982-02-01	0.001518
10q11.21q11.23 copy number variation syndrome	12	1	DLST	11	MAGED1,NUDT5,BGLAP,PARG,CCDC167,MCM6,DLD,KIAA1033,SSB,CHRNA5,VPS26A	1982-02-01	0.001521
Intraflagellar transport proteins binding to dynein	5	0		5	WDR19,IFT22,IFT46,DYNLRB1,DYNC1I2	1981-02-01	0.001542
Mitochondrial complex II assembly	3	1	SDHAF4	2	SDHAF2,SDHB	1978-02-01	0.001655
Hijack of ubiquitination by SARS-CoV-2	3	0		3	NAE1,UBA3,CUL2	1978-02-01	0.001655
Bladder cancer	6	4	CDKN1A,ERBB2,MDM2,KRAS	2	CDK4,RAF1	1978-02-01	0.001664
Orexin receptor pathway	21	13	JARID2,TOX,PDPK1,ARRB1,VHL,PTPN11,CAMKK2,RPS6KA1,GNA11,LDLR,LUZP1,CDKN1A,SRF	8	NSMAF,DDX52,BTF3,BGLAP,CASP7,CASP3,NFE2L2,OPN3	1974-02-01	0.001805
Activation of gene expression by SREBF (SREBP)	9	6	SCD,HMGCS1,SP1,MVD,LSS,CYP51A1	3	GGPS1,IDI1,FDFT1	1974-02-01	0.001822
Cell interactions of the pancreatic cancer microenvironment	5	1	NRP1	4	IFITM2,HLA-DRB1,HLA-DRA,CXCR4	1974-02-01	0.001827
Progeria-associated lipodystrophy	5	2	LMNB1,LMNB2	3	RECQL,BANF1,FNTA	1974-02-01	0.001827
NF1 copy number variation syndrome	11	4	BCL2,JARID2,EED,EXOC8	7	CRY1,RFC2,HOXA9,RFC4,CTD-2349P21.1,CCNE2,EXOC6	1969-02-01	0.002024
One-carbon metabolism	5	4	DHFR,MTHFD1L,MTR,AHCY	1	MAT2B	1967-02-01	0.002150
Fatty acid transporters	4	1	FABP5	3	ACSL1,ACSL4,ACSL5	1964-02-01	0.002287
Genes associated with the development of rheumatoid arthritis	4	2	PHF19,CIITA	2	HLA-DRB1,BLK	1964-02-01	0.002287
Inhibition of exosome biogenesis and secretion by Manumycin A in CRPC cells	4	1	KRAS	3	RAB27A,RAF1,RRAS2	1964-02-01	0.002287
Cytosolic DNA-sensing pathway	8	2	ADAR,RNF125	6	POLR2K,POLR2H,POLR2L,POLR1C,ATG12,TRADD	1962-02-01	0.002402
Gene and protein expression by JAK-STAT signaling after Interleukin-12 stimulation	8	4	LMNB1,CNN2,MIF,CDC42	4	BOLA2,PPIA,AIP,ANXA2	1962-02-01	0.002402
Sterol regulatory element-binding proteins (SREBP) signaling	8	6	SP1,LSS,MVD,CYP51A1,LDLR,SCD	2	CDK8,PRKAG1	1962-02-01	0.002402
Network map of SARS-CoV-2 signaling pathway	28	4	NEK9,GSN,DDIT4,CTSZ	24	ERLEC1,SDF2,GTF2F2,MOV10,SRP72,SRP54,RTN4,PITRM1,PMPCB,CASP3,BID,TANK,IFITM1,IFITM3,SQSTM1,RHEB,ULK1,CAMK4,WDR74,CTSB,IGLC2,HLA-DRA,HLA-DRB1,IGLL1	1960-02-01	0.002496
Cell cycle checkpoints	2	1	CDKN1A	1	WEE1	1958-02-01	0.002648
Mitochondrial immune response to SARS-CoV-2	6	0		6	NDUFAF1,BCS1L,NDUFB9,TLR3,PHB,TLR7	1956-02-01	0.002744
Kit receptor signaling pathway	7	6	RPS6KA1,RPS6KA3,GAB2,BCL2,CRKL,PTPN11	1	RAF1	1955-02-01	0.002815
Serotonin receptor 2 and ELK-SRF/GATA4 signaling	4	3	KRAS,ELK4,SRF	1	RAF1	1955-02-01	0.002823
Fatty Acids and Lipoproteins Transport in Hepatocytes	10	5	SORT1,MYLIP,LDLR,TSPO,FABP5	5	LRPAP1,ACSL1,ACSL4,ACSL5,SLC27A2	1955-02-01	0.002823
Mitochondrial gene expression	4	3	NRF1,GABPB2,SP1	1	CAMK4	1955-02-01	0.002823
Base excision repair	5	0		5	APEX1,POLB,SMUG1,POLE2,POLD4	1954-02-01	0.002917
Direct reversal repair	2	0		2	ALKBH2,ALKBH3	1952-02-01	0.003044
Integrated lung cancer pathway	8	3	ERBB2,BCL2,MDM2	5	CASP3,MIR21,CASP7,RAF1,PAK1	1951-02-01	0.003081
Novel intracellular components of RIG-I-like receptor pathway	7	1	RNF125	6	ATG12,TRADD,TANK,AZI2,PIN1,SNW1	1951-02-01	0.003100
Allograft rejection	9	0		9	CD55,CASP7,CASP3,HLA-DRA,HLA-DRB1,HLA-DPA1,HLA-DQA1,HLA-DMA,HLA-DPB1	1947-02-01	0.003355
Host-pathogen interaction of human coronaviruses - apoptosis	5	2	BCL2,BAX	3	BID,CASP3,CASP7	1947-02-01	0.003366
Leptin and adiponectin	3	2	ADIPOR2,CPT1A	1	PRKAG1	1947-02-01	0.003378
Trans-sulfuration pathway	3	2	MTR,AHCY	1	MAT2B	1947-02-01	0.003378
Apoptosis modulation by HSP70	4	0		4	CASP3,CYCS,BID,CASP7	1946-02-01	0.003440
Nanomaterial induced apoptosis	4	2	BCL2,BAX	2	CASP7,CASP3	1946-02-01	0.003440
Glutathione metabolism	4	0		4	GSTM2,GCLC,GPX4,GSTM1	1946-02-01	0.003440
Glycolysis and gluconeogenesis	6	4	PFKP,PFKL,ENO1,HK2	2	FBP1,DLD	1946-02-01	0.003448
Corticotropin-releasing hormone signaling pathway	9	5	SP1,GNA11,PLCG2,ARRB1,BCL2	4	TLR4,TCF4,CASP3,GNAZ	1944-02-01	0.003602
Chromatin organization	2	2	BRWD1,DOT1L	0		1942-02-01	0.003811
16p11.2 distal deletion syndrome	5	2	VAV2,NFATC2	3	CD81,CD19,IFITM1	1941-02-01	0.003863
16p11.2 proximal deletion syndrome	5	2	VAV2,NFATC2	3	CD81,CD19,IFITM1	1941-02-01	0.003863
Type I interferon induction and signaling during SARS-CoV-2 infection	5	0		5	TLR3,OAS1,TYK2,TLR7,TLR4	1941-02-01	0.003863
Type I collagen synthesis in the context of osteogenesis imperfecta	5	2	LRP6,PLOD1	3	P3H1,SERPINF1,MIA3	1941-02-01	0.003863
Oxidative stress response	5	1	SP1	4	NFE2L2,GCLC,CAT,NQO1	1941-02-01	0.003863
Regulation of IGF transport and uptake by IGF binding proteins	1	0		1	IGFBP2	1941-02-01	0.003933
Angiopoietin-like protein 8 regulatory pathway	11	6	PIK3CD,SCD,MAP2K7,RPS6KA1,RPS6KA3,CBLB	5	PIK3C3,RHEB,PIK3R4,RAF1,MAP2K5	1940-02-01	0.003958
Glycolysis pathway	4	4	HK2,PFKL,PFKP,ENO1	0		1938-02-01	0.004142
Imatinib and chronic myeloid leukemia	4	2	SPRED2,GAB2	2	PVT1,GADD45A	1938-02-01	0.004142
New SOTOS	7	2	BRCA1,COX6C	5	PRELID1,HIGD2A,SNCA,FAM193B,COX6B1	1937-02-01	0.004279
CAMKK2 pathway	9	4	FIS1,NFATC2,HK2,CAMKK2	5	ASNS,CAMK4,SQSTM1,SELL,ULK1	1936-02-01	0.004411
Arsenic metabolism and reactive oxygen species generation	3	1	AS3MT	2	COA3,CAT	1934-02-01	0.004534
IL-3 signaling pathway	6	5	BCL2,CRKL,GAB2,PTPN11,PIK3CD	1	RAF1	1932-02-01	0.004745
Pathways affected in adenoid cystic carcinoma	7	5	ARID5B,BRCA1,MGA,ERBB2,CTBP1	2	MYCBP,RAF1	1931-02-01	0.004865
JAK-STAT signaling in the regulation of Beta-cells	5	2	KRAS,IL6R	3	SOCS2,PRL,CDK4	1930-02-01	0.005012
Photodynamic therapy-induced AP-1 survival signaling	6	4	MAP2K7,CDKN1A,BCL2,BAX	2	BID,NFE2L2	2028-02-01	0.005248
Immunoregulatory interactions between lymphoid and non-lymphoid cells	2	1	NCR3LG1	1	SELL	2028-02-01	0.005257
AGE/RAGE pathway	7	2	CDC42,SP1	5	CASP3,ROCK1,RAF1,CYCS,MMP14	2028-02-01	0.005294
DNA IR-damage and cellular response via ATR	9	6	FANCA,MDM2,SP1,BRCA2,BRCA1,FANCD2	3	BLM,POLB,RECQL	2024-02-01	0.005720
Glycolysis pathway D (2)	4	4	PFKP,PFKL,ENO1,HK2	0		2023-02-01	0.005823
Glycolysis pathway D (2)	4	4	PFKP,PFKL,ENO1,HK2	0		2023-02-01	0.005823
Immune response to tuberculosis	4	0		4	PSMB8,OAS1,IFITM1,TYK2	2023-02-01	0.005823
Photodynamic therapy-induced NFE2L2 (NRF2) survival signaling	4	0		4	GCLC,GSTP1,NFE2L2,NQO1	2023-02-01	0.005823
RAF/MAP kinase cascade	3	1	PTPN7	2	PHB,PAQR3	2022-02-01	0.006048
G13 signaling pathway	5	2	PIK3CD,CDC42	3	CYFIP1,ARHGDIB,ROCK1	2015-02-01	0.007158
CKAP4 signaling pathway map	10	6	BRCA1,CD44,BAX,BCL2,MDM2,MIF	4	FBXO3,CASP3,CASP4,MMP14	2013-02-01	0.007362
Spina bifida	3	2	MTR,AHCY	1	MAT2B	2013-02-01	0.007489
Familial hyperlipidemia type 3	3	1	LDLR	2	VLDLR,LIPC	2013-02-01	0.007489
Purine metabolism	3	0		3	ADSL,DGUOK,PNP	2013-02-01	0.007489
Homologous recombination	3	1	BRCA2	2	POLD4,RAD54B	2013-02-01	0.007489
Purine metabolism and related disorders	4	0		4	ADSL,DGUOK,PNP,TPMT	2023-10-02	0.007905
Eicosanoid synthesis	4	0		4	ALOX5AP,TBXAS1,LTA4H,PNPLA8	2023-10-02	0.007905
Glycolysis and Gluconeogenesis - for workshop	5	4	PFKP,PFKL,ENO1,HK2	1	FBP1	2023-10-02	0.007997
TAR	6	1	LIX1L	5	GPR89A,SUMO1,CXCR4,FLT3,PEX11B	2023-08-02	0.008361
Microglia pathogen phagocytosis pathway	5	4	ITGB2,PLCG2,VAV2,PIK3CD	1	PIK3C3	2023-05-02	0.008902
ATM signaling pathway	5	3	BRCA1,FANCD2,MDM2	2	GADD45A,BID	2023-01-02	0.009874
Proximal tubule transport	6	0		6	ATP6V0E1,SLC3A2,ATP6V0B,ATP6V1G1,ATP6V1F,ATP6V1E1	2.00	0.009916
Interferon type I signaling pathways	6	4	GAB2,CRKL,PIK3CD,PTPN11	2	TYK2,EIF4A1	1997-01-01	0.010766
IL-2 signaling pathway	5	4	GAB2,CRKL,BCL2,PTPN11	1	RAF1	1996-01-01	0.010918
7-oxo-C and 7-beta-HC pathways	3	0		3	ACOT1,ACOT2,ACOT13	1994-01-01	0.011356
GPR40 pathway	3	3	PLCG2,GNA11,PLCB2	0		1994-01-01	0.011356
ERK pathway in Huntington's disease	3	0		3	CASP7,CASP3,RAF1	1994-01-01	0.011356
Homologous recombination	4	2	BRCA1,BRCA2	2	SSB,BLM	1993-01-01	0.011857
Wnt signaling	9	5	PPP3R1,LRP6,PLCB2,NFATC2,CTBP1	4	PPP3CC,RYK,SERPINF1,CTBP2	1989-01-01	0.012907
Vasopressin-regulated water reabsorption	5	0		5	DCTN2,CREB3,DYNC1I2,DCTN6,ARHGDIB	1988-01-01	0.013225
AXL signaling pathway	13	8	SP1,BCL2,CPT1A,SCD,CDKN1A,PTPN11,KRAS,MDM2	5	ANXA2,CDK4,CASP3,PAK1,ELMO1	1985-01-01	0.013971
Hippo signaling regulation pathways	8	5	GNA11,PRKAR2A,PRKCH,PLCB2,CDC42	3	PRKAG1,STK3,FLT3	1985-01-01	0.013971
Gamma-glutamyl cycle for the biosynthesis and degradation of glutathione, including diseases	2	0		2	GGCT,GCLC	1985-01-01	0.014265
Pilocytic astrocytoma	2	1	PTPN11	1	RAF1	1985-01-01	0.014265
Osteoblast differentiation and related diseases	9	6	LRP6,PTCH1,NOTCH2,PRKCH,PIK3CD,PIK3C2B	3	BMPR2,PIK3R4,PIK3C3	1984-01-01	0.014309
miRNA regulation of prostate cancer signaling pathways	5	4	BCL2,KRAS,CDKN1A,MDM2	1	RAF1	1984-01-01	0.014493
GPR143 in melanocytes and retinal pigment epithelium cells	4	3	GNA15,ARRB1,PLCB2	1	SERPINF1	1982-01-01	0.015086
Pathogenesis of SARS-CoV-2 mediated by nsp9-nsp10 complex	4	0		4	IGLC2,HLA-DRA,HLA-DRB1,IGLL1	1982-01-01	0.015086
Regucalcin in proximal tubule epithelial kidney cells	5	3	BAX,PPP3R1,MCU	2	CASP3,RAF1	1980-01-01	0.015840
Translation inhibitors in chronically activated PDGFRA cells	5	3	RPS6KA1,MAP2K7,EIF4G1	2	MAP2K5,EIF4A1	1980-01-01	0.015840
Envelope proteins and their potential roles in EDMD physiopathology	5	3	SYNE3,SRF,KRAS	2	BANF1,LEMD3	1980-01-01	0.015840
Iron metabolism disorders	3	0		3	FTL,CYBRD1,BCS1L	1979-01-01	0.016180
Fcgamma receptor (FCGR) dependent phagocytosis	1	0		1	PAK1	1978-01-01	0.016496
Burn wound healing	9	4	CNN2,BCL2,NOTCH2,BAX	5	TLR4,CXCR4,TLR3,TLR7,CASP3	1978-01-01	0.016619
Tumor suppressor activity of SMARCB1	4	2	PTCH1,EED	2	CDK4,ACTL6A	1977-01-01	0.016889
Energy metabolism	5	2	PPP3R1,NRF1	3	PRKAG1,CAMK4,PPP3CC	1976-01-01	0.017267
Calcium regulation in cardiac cells	11	8	STIM2,GNB4,ANXA6,GNA11,PRKCH,ARRB1,YWHAG,PRKAR2A	3	CAMK4,GNG5,GNAZ	1975-01-01	0.017950
Trans-sulfuration pathway	5	2	MTR,AHCY	3	MAT2B,GCLC,DLD	1973-01-01	0.018778
Aryl hydrocarbon receptor pathway	5	1	SLC7A5	4	AIP,CAP2,NQO1,NFE2L2	1973-01-01	0.018778
Initiation of transcription and translation elongation at the HIV-1 LTR	4	3	NFATC2,PPP3R1,SP1	1	PPP3CC	1973-01-01	0.018821
Serotonin receptor 4/6/7 and NR3C signaling	3	2	SRF,ELK4	1	ATF1	1972-01-01	0.018959
Sulfation biotransformation reaction	3	0		3	PAPSS1,SULT1A4,SULT1A3	1972-01-01	0.018959
Acquired partial lipodystrophy / Barraquer-Simons syndrome	3	2	LMNB2,LMNB1	1	FNTA	1972-01-01	0.018959
SREBF and miR33 in cholesterol and lipid homeostasis	3	3	SCD,HMGCS1,LDLR	0		1972-01-01	0.018959
Thyroid stimulating hormone (TSH) signaling pathway	6	2	PDPK1,RPS6KA1	4	RAF1,MYL12B,CDK4,APEX1	1971-01-01	0.019491
Sandbox pathway test	2	2	BRCA2,BRCA1	0		1971-01-01	0.019548
Mevalonate pathway	2	2	MVD,HMGCS1	0		1971-01-01	0.019548
Mitotic G2-G2/M phases	2	1	CDKN1A	1	WEE1	1970-01-01	0.020161
Interactions between immune cells and microRNAs in tumor microenvironment	5	2	MIR155,IL4R	3	TLR4,MIR21,TLR7	1969-01-01	0.020372
Antiviral and anti-inflammatory effects of Nrf2 on SARS-CoV-2 pathway	4	0		4	NFE2L2,GCLC,NQO1,GUCY1B3	1968-01-01	0.020884
MAPK cascade	4	3	MAP2K7,RASA3,KRAS	1	RAF1	1968-01-01	0.020884
Synaptic signaling pathways associated with autism spectrum disorder	5	2	PIK3CD,KRAS	3	PRKAG1,RHEB,CAMK4	1966-01-01	0.022053
Familial partial lipodystrophy	4	2	LMNB1,LMNB2	2	BANF1,FNTA	1964-01-01	0.023081
Type 2 papillary renal cell carcinoma	4	2	CDKN1A,VHL	2	PRCC,CUL2	1964-01-01	0.023081
Hepatocyte growth factor receptor signaling	4	2	PTPN11,CRKL	2	PAK1,RAF1	1964-01-01	0.023081
Influenza Infection	1	1	PABPN1	0		1963-01-01	0.023546
Ether lipid biosynthesis	3	2	LPCAT1,LPIN2	1	PEX1	1960-01-01	0.025257
Disorders of bile acid synthesis and biliary transport	3	1	ABCB4	2	SCP2,HSD17B4	1960-01-01	0.025257
Calcium mediated T-cell apoptosis involved in inclusion body myositis	3	1	NFATC2	2	CAPN2,PPP3CC	1960-01-01	0.025257
Hereditary leiomyomatosis and renal cell carcinoma pathway	3	0		3	NFE2L2,PRKAG1,CUL3	1960-01-01	0.025257
Hematopoietic stem cell gene regulation by GABP alpha/beta complex	3	2	BCL2,ETV6	1	FLT3	1960-01-01	0.025257
TROP2 regulatory signaling	6	3	PDPK1,BCL2,BAX	3	MDK,CASP3,CDK4	1960-01-01	0.025274
test pathway	2	1	SPTLC2	1	ASAH1	1959-01-01	0.025512
Biosynthesis and turnover of 1-deoxy-sphingoid bases	2	1	SPTLC2	1	ASAH1	1959-01-01	0.025512
Peroxiredoxin 2 induced ovarian failure	2	1	BAX	1	CASP3	1959-01-01	0.025512
CYP2E1 activation leading to neurodegeneration	2	1	BCL2	1	NFE2L2	1959-01-01	0.025512
Glucocorticoid receptor pathway	6	3	PDE4B,SLC26A2,ABHD2	3	ALOX5AP,TSC22D3,BIRC2	1957-01-01	0.026880
Pathogenic Escherichia coli infection	6	2	CDC42,TUBA4A	4	ARPC5,ROCK1,ARPC2,TLR4	1957-01-01	0.026880
Folate metabolism	6	4	SLC19A1,AHCY,DHFR,LDLR	2	RFK,FLAD1	1957-01-01	0.026880
Resolution of Abasic Sites (AP sites)	5	1	ADPRHL2	4	POLB,APEX1,PARG,SMUG1	1956-01-01	0.027624
Cardiomyocyte signaling pathways converging on Titin	4	3	GUCD1,SRF,MDM2	1	RAF1	1952-01-01	0.030486
Methylation pathways	2	0		2	TPMT,MAT2B	1949-01-01	0.032109
Heme biosynthesis	2	0		2	UROS,UROD	1949-01-01	0.032109
Hemesynthesis defects and porphyrias	2	0		2	UROS,UROD	1949-01-01	0.032109
Nanomaterial-induced inflammasome activation	2	0		2	CTSB,TLR4	1949-01-01	0.032109
Tgif disruption of Shh signaling	2	1	TGIF2	1	TGIF1	1949-01-01	0.032109
Folate-alcohol and cancer pathway hypotheses	2	1	MTR	1	ADH5	1949-01-01	0.032109
WikiPathways Academy: met-1-second	1	1	HMGCS1	0		1949-01-01	0.032205
Hippo-Merlin signaling dysregulation	10	6	PRKAR2A,ITGA4,ITGAE,ITGB2,CD44,KRAS	4	STK3,FLT3,PPP1R12A,PAK1	1949-01-01	0.032329
PKC-gamma calcium signaling pathway in ataxia	3	3	PLCB2,GNA11,GNA15	0		1949-01-01	0.032540
Regulation of apoptosis by parathyroid hormone-related protein	3	2	BCL2,BAX	1	BID	1949-01-01	0.032540
Genetic causes of porto-sinusoidal vascular disease	4	2	CDC42,SP1	2	DGUOK,IBTK	1948-01-01	0.033230
PTEN Regulation	1	1	SALL4	0		1948-01-01	0.033444
Beta-catenin independent WNT signaling	1	0		1	RYK	1946-01-01	0.034438
Signaling by FGFR2	1	1	PTPN11	0		1946-01-01	0.034708
miR-targeted genes in adipocytes	4	3	MIR155,FADS3,FADS1	1	CSRP1	1944-01-01	0.036114
Sphingolipid metabolism overview	3	2	UGCG,SPTLC2	1	ASAH1	1944-01-01	0.036548
NRF2-ARE regulation	3	0		3	GCLC,NQO1,CUL3	1944-01-01	0.036548
DDR1-mediated signaling	5	4	CDKN1A,MAP2K7,SP1,PTPN11	1	CD9	1941-01-01	0.038744
PDGF pathway	4	2	SRF,CDC42	2	RAF1,PAK1	1941-01-01	0.039138
Linoleic acid metabolism affected by SARS-CoV-2	2	1	FADS1	1	ACOT2	1941-01-01	0.039292
Ethanol metabolism production of ROS by CYP2E1	2	1	SP1	1	NFE2L2	1941-01-01	0.039292
Adipogenesis	9	7	MIF,SCD,CDKN1A,SP1,NRIP1,AGPAT2,LPIN2	2	GTF3A,GADD45A	1940-01-01	0.039971
Sudden infant death syndrome (SIDS) susceptibility pathways	10	5	SP1,IL6R,PRKAR2A,YWHAG,CPT1A	5	HADHA,CASP3,HADHB,SLC25A4,HSP90B1	1939-01-01	0.040325
Triacylglyceride synthesis	3	1	AGPAT2	2	AGPAT5,LIPC	1939-01-01	0.040796
Type II interferon signaling	4	2	PTPN11,CIITA	2	PSMB9,OAS1	1937-01-01	0.042301
Nucleotide-binding oligomerization domain (NOD) pathway	4	2	NDUFA13,XIAP	2	RIPK2,CASP7	1937-01-01	0.042301
IL-5 signaling pathway	4	3	RPS6KA1,PTPN11,BCL2	1	RAF1	1937-01-01	0.042301
TYROBP causal network in microglia	5	4	ITGB2,RPS6KA1,ZFP36L2,SH2B3	1	LGALS9C	1936-01-01	0.043854
Metabolic reprogramming in colon cancer	4	3	PFKL,ENO1,DLST	1	SDHB	1934-01-01	0.045605
Deadenylation-dependent mRNA decay	5	1	EIF4G1	4	PAIP1,PABPC1,DCPS,NT5C3B	1933-01-01	0.046553
Degradation of the extracellular matrix	1	1	CD44	0		1932-01-01	0.047794
Glycogen synthesis and degradation	4	1	PPP2R4	3	PPP2CB,PPP2R5A,PPP2R2A	1931-01-01	0.049048
1p36 copy number variation syndrome	7	3	DLST,COMMD1,CDK11B	4	MIR6859-2,CUL3,GDE1,INTS10	1931-01-01	0.049071
Sphingolipid metabolism: integrated pathway	3	2	UGCG,SPTLC2	1	ASAH1	1930-01-01	0.049999
Twelve loci associated with ADHD	3	1	KDM4A	2	ATP6V0B,POC1B	1930-01-01	0.049999
PPAR-alpha pathway	3	1	CPT1A	2	SCP2,CDK4	1930-01-01	0.049999
Modulators of TCR signaling and T cell activation	5	4	CBLB,SH2B3,PDPK1,AGO1	1	MALT1	2028-01-01	0.052241
Complement cascade	2	0		2	CD55,CD59	2028-01-01	0.052530
Neural crest cell migration in cancer	4	2	PIK3CD,SORT1	2	PIK3R4,PAK1	2028-01-01	0.052630
Intracellular trafficking proteins involved in CMT neuropathy	3	0		3	PMP22,MTMR2,RAB4B	2026-01-01	0.054946
Wnt/beta-catenin signaling pathway in leukemia	3	2	LRP6,SALL4	1	FLT3	2026-01-01	0.054946
mRNA vaccine activation of dendritic cell and induction of IFN-1	2	0		2	TLR3,TLR7	2026-01-01	0.055239
Methionine metabolism leading to sulfur amino acids and related disorders	2	1	AHCY	1	MAT2B	2026-01-01	0.055239
RalA downstream regulated genes	2	2	CDC42,KRAS	0		2026-01-01	0.055239
Bone morphogenic protein signaling and regulation	2	1	SMURF1	1	BMPR2	2026-01-01	0.055239
miRNA role in immune response in sepsis	5	2	MIR155HG,MIR155	3	TLR4,TLR7,MIR21	2023-01-01	0.058316
IL-18 signaling pathway	16	9	BAX,RASA3,BCL2,SP1,LMNB2,RANGAP1,ENO1,CPT1A,MAP2K7	7	CYCS,MMP14,PRCC,RAF1,BID,CASP3,BPGM	2023-01-01	0.058558
A network map of Macrophage-stimulating protein (MSP) signaling	8	6	RPS6KA1,PDPK1,RPS6KA3,HK2,CPT1A,CRKL	2	BGLAP,RAF1	2023-01-01	0.059265
Kleefstra syndrome	3	0		3	ACTL6A,ASH2L,DPY30	2022-01-01	0.060116
Sphingolipid metabolism in senescence	3	1	S1PR1	2	CDK4,ASAH1	2022-01-01	0.060116
Mevalonate arm of cholesterol biosynthesis pathway with inhibitors	5	2	HMGCS1,MVD	3	FDFT1,IDI1,GGPS1	2020-01-01	0.063374
WikiPathways Academy: draw-complex	1	0		1	SUCLG1	2020-01-01	0.063374
Evolocumab mechanism to reduce LDL cholesterol	1	1	LDLR	0		2020-01-01	0.063374
Hypoxia-mediated EMT and stemness	1	1	DICER1	0		2020-01-01	0.063374
PCSK9-mediated LDL receptor degradation	1	1	LDLR	0		2020-01-01	0.063374
Valproic acid pathway	2	0		2	HADHB,HADHA	2019-01-01	0.063920
Mammary gland development pathway - Puberty (Stage 2 of 4)	2	2	ERBB2,NRIP1	0		2019-01-01	0.063920
Dopamine metabolism	2	0		2	NQO1,PPP2CB	2019-01-01	0.063920
NO/cGMP/PKG mediated neuroprotection	4	3	TSPO,XIAP,BCL2	1	GUCY1B3	2019-01-01	0.064204
Heart development	4	3	PTPN11,SRF,NFATC2	1	BMPR2	2019-01-01	0.064204
COVID-19 structural coverage map	3	1	NRP1	2	PAIP1,UBC	2018-01-01	0.065506
Selenium micronutrient network	6	3	MTR,PRDX5,LDLR	3	RFK,PRDX3,FLAD1	2017-01-01	0.067734
Nucleotide Excision Repair	1	0		1	CETN2	2016-01-01	0.069826
Extracellular vesicle-mediated signaling in recipient cells	3	2	ERBB2,KRAS	1	RAF1	2015-01-01	0.071108
MTOR signaling	4	2	EIF4G1,LAMTOR4	2	LAMTOR3,SLC38A9	2014-01-01	0.072597
Glucocorticoid biosynthesis	2	0		2	CBR1,AKR1C3	2014-01-01	0.073023
Disorders of fructose metabolism	2	1	PFKL	1	FBP1	2014-01-01	0.073023
Alpha-linolenic (omega-3) and linoleic (omega-6) acid metabolism	3	1	FADS1	2	SCP2,ACSL1	2014-01-01	0.073023
Statin inhibition of cholesterol production	3	1	LDLR	2	LIPC,FDFT1	2023-11-01	0.076917
Toll-like receptor signaling related to MyD88	3	0		3	TLR7,TLR4,TLR3	2023-11-01	0.076917
PI3K-AKT-mTOR signaling pathway and therapeutic opportunities	3	1	KRAS	2	ULK1,RHEB	2023-11-01	0.076917
Th17 cell differentiation pathway	5	2	IL6R,IL4R	3	HLA-DMA,TYK2,CRY1	2023-10-01	0.078847
RAC1/PAK1/p38/MMP2 pathway	5	3	BAX,ERBB2,KRAS	2	PAK1,CASP7	2023-10-01	0.078847
Synaptic vesicle pathway	4	1	SYT1	3	NAPA,AP2M1,SLC25A4	2023-09-01	0.081517
Familial hyperlipidemia type 5	2	1	LDLR	1	LIPC	2023-08-01	0.082510
Transcriptional activation by NRF2 in response to phytochemicals	2	0		2	GCLC,NQO1	2023-08-01	0.082510
ATF6 (ATF6-alpha) activates chaperone genes	2	0		2	ATF4,HSP90B1	2023-08-01	0.082510
Interconversion of nucleotide di- and triphosphates	3	0		3	AK6,GUK1,GLRX	2023-08-01	0.082927
Ovarian infertility	3	1	NRIP1	2	ZP3,CDK4	2023-08-01	0.082927
One-carbon metabolism and related pathways	4	1	MTR	3	GPX4,GCLC,PEMT	2023-06-01	0.086171
Th17 cell differentiation pathway	5	2	IL6R,IL4R	3	HLA-DMA,TYK2,CRY1	2023-06-01	0.086447
RNA Polymerase I Transcription	7	2	TAF1B,POLR1A	5	TAF1D,POLR2H,POLR2L,POLR1C,POLR2K	2023-06-01	0.088049
Serotonin HTR1 group and FOS pathway	3	3	PDPK1,SRF,ELK4	0		2023-05-01	0.089131
Purinergic signaling	3	2	P2RY8,P2RY11	1	GNAZ	2023-05-01	0.089131
Disruption of postsynaptic signaling by CNV	3	2	NLGN4X,YWHAG	1	CYFIP1	2023-05-01	0.089131
BDNF-TrkB signaling	3	2	GAB2,KRAS	1	RHEB	2023-05-01	0.089131
Arrhythmogenic right ventricular cardiomyopathy	5	5	JUP,ACTN1,ACTN4,DAG1,ITGA4	0		2023-04-01	0.090386
Fc epsilon receptor (FCERI) signaling	4	3	GAB2,MAP2K7,PDPK1	1	MALT1	2023-04-01	0.091585
Iron-sulfur cluster biogenesis	2	0		2	LYRM4,NUBP1	2023-03-01	0.092347
Familial hyperlipidemia type 2	2	1	LDLR	1	LIPC	2023-03-01	0.092347
nsp1 from SARS-CoV-2 inhibits translation initiation in the host cell	2	0		2	EIF3I,EIF3G	2023-03-01	0.092347
Hedgehog signaling pathway	2	1	PTCH1	1	SAP18	2023-03-01	0.092347
Cancer immunotherapy by CTLA4 blockade	2	2	PTPN11,PIK3CD	0		2023-03-01	0.092347
Interactome of polycomb repressive complex 2 (PRC2)	2	1	EED	1	BCLAF1	2023-03-01	0.092347
TCA cycle and deficiency of pyruvate dehydrogenase complex (PDHc)	2	1	DLST	1	DLD	2023-03-01	0.092347
Rap1 signaling	2	1	RAP1GAP2	1	RAF1	2023-03-01	0.092347
Cell surface interactions at the vascular wall	4	3	CD58,PTPN11,ANGPT1	1	PPIA	2023-03-01	0.092988
Ethylmalonic encephalopathy	1	0		1	ETHE1	2023-03-01	0.093539
Signaling by FGFR1	1	1	PTPN11	0		2023-02-01	0.095585
Transcriptional regulation by RUNX3	1	1	CDKN1A	0		2023-02-01	0.095682
Pre-NOTCH Expression and Processing	1	0		1	POGLUT1	2023-01-01	0.096823
MAPK6/MAPK4 signaling	1	0		1	2007-09-01	2023-01-01	0.098458
PIP3 activates AKT signaling	2	2	MDM2,PDPK1	0		2023-01-01	0.098837
TCR signaling	2	1	PDPK1	1	RIPK2	2023-01-01	0.098837
Oxidative Stress Induced Senescence	1	1	EED	0		1.00	0.100742
RANKL/RANK signaling pathway	4	3	MAP2K7,GAB2,CDC42	1	SQSTM1	1.00	0.100877
Vitamin D-sensitive calcium signaling in depression	3	1	BCL2	2	GCLC,NFE2L2	0.99	0.102096
Prion disease pathway	3	1	CHD2	2	HSP90B1,CASP3	0.99	0.102096
Pro-survival signaling of neuroprotectin D1	2	1	BAX	1	TRADD	0.99	0.102503
Riboflavin and CoQ disorders	3	0		3	APTX,ETFDH,PHB	0.99	0.102503
Cells and molecules involved in local acute inflammatory response	2	2	ITGB2,ITGA4	0		0.99	0.102503
Leptin-insulin signaling overlap	2	1	PDPK1	1	SOCS2	0.99	0.102503
Canonical and non-canonical TGF-B signaling	2	0		2	BMPR2,LOXL2	0.99	0.102503
Amplification and expansion of oncogenic pathways as metastatic traits	2	1	VHL	1	CXCR4	0.99	0.102503
Trafficking and processing of endosomal TLR	2	1	CNPY3	1	TLR3	0.99	0.102503
Embryonic stem cell pluripotency pathways	7	4	PIK3CD,MDM2,PTPN11,LRP6	3	BMPR2,RAF1,MAP2K5	0.98	0.103896
Oxysterols derived from cholesterol	3	0		3	ACOT1,ACOT2,ACOT13	0.96	0.108843
Epithelial to mesenchymal transition in colorectal cancer	9	6	JUP,KRAS,NOTCH2,EED,LRP6,PIK3CD	3	RAF1,TUSC3,PAK1	0.96	0.109900
IL-4 signaling pathway	4	3	PTPN11,IL4R,PIK3CD	1	TYK2	0.95	0.111280
SARS-CoV-2 innate immunity evasion and cell-specific immune response	5	0		5	RAE1,TLR7,TRADD,IFITM1,TANK	0.95	0.111422
Estrogen metabolism	2	0		2	NQO1,GSTM1	0.95	0.112946
Warburg effect modulated by deubiquitinating enzymes and their substrates	5	3	HK2,VHL,U2AF2	2	OTUD6B,FBP1	0.95	0.112946
Familial hyperlipidemia type 1	2	1	LDLR	1	LIPC	0.95	0.112946
Platelet-mediated interactions with vascular and circulating cells	2	0		2	TLR4,TLR7	0.95	0.112946
OAS antiviral response	2	0		2	ABCE1,OAS1	0.95	0.112946
ncRNAs involved in STAT3 signaling in hepatocellular carcinoma	2	1	IL6R	1	MIR21	0.95	0.112946
MYD88 distinct input-output pathway	2	0		2	TLR4,TLR7	0.95	0.112946
Arachidonic acid (AA, ARA) oxylipin metabolism	1	0		1	TBXAS1	0.91	0.122733
miR-222 in exercise-induced cardiac growth	1	0		1	HMBOX1	0.91	0.122733
WikiPathways Tutorial: demo_step3	1	0		1	FDFT1	0.91	0.122733
Cholestasis	2	2	ABCB4,LDLR	0		0.91	0.123647
Pathways of nucleic acid metabolism and innate immune sensing	2	1	ADAR	1	OAS1	0.91	0.123647
Major pathway of rRNA processing in the nucleolus and cytosol	11	3	RPS14,RPS27L,NOL9	8	DIS3,ERI1,EXOSC10,LTV1,RIOK2,NIP7,NOL11,RIOK1	0.90	0.126847
Transcriptional regulation by RUNX1	3	1	SOCS4	2	BLK,KCTD6	0.89	0.128567
Signaling by the B Cell Receptor (BCR)	3	2	CD22,PLCG2	1	MALT1	0.89	0.128567
Interleukin-4 and Interleukin-13 signaling	3	1	IL4R	2	TYK2,HSP90B1	0.89	0.129628
Neural crest cell migration during development	3	1	PIK3CD	2	PIK3R4,PAK1	0.89	0.130057
XBP1(S) activates chaperone genes	6	3	GFPT1,HDGF,DDX11	3	SULT1A3,WIPI1,ACADVL	0.88	0.131116
Notch signaling pathway	4	2	CDKN1A,NOTCH2	2	PSENEN,SNW1	0.87	0.133425
Lung pathology of COVID-19	2	0		2	TLR7,TLR3	0.87	0.134580
Congenital generalized lipodystrophy	2	2	AGPAT2,LPIN2	0		0.87	0.134580
RHOBTB GTPase Cycle	2	0		2	RHOBTB2,RHOBTB1	0.87	0.134580
Olfactory bulb development and olfactory learning	2	1	PCNT	1	TTC8	0.87	0.134580
RNA Polymerase II Transcription	2	1	AFF4	1	GTF2B	0.87	0.134805
Signaling by FGFR3	1	1	PTPN11	0		0.87	0.135070
Hedgehog 'on' state	1	1	PTCH1	0		0.87	0.135070
trans-Golgi Network Vesicle Budding	6	2	ARRB1,GBF1	4	TXNDC5,BLOC1S1,CHMP2A,NAPA	0.87	0.135152
Clathrin-mediated endocytosis	1	0		1	REPS1	0.87	0.135174
RHO GTPases activate formins	1	1	SRF	0		0.87	0.135377
Response to elevated platelet cytosolic Ca ions	1	0		1	STXBP3	0.87	0.135678
lncRNA in canonical Wnt signaling and colorectal cancer	6	2	LRP6,CTBP1	4	RYK,CDK8,SERPINF1,CTBP2	0.86	0.137344
Intrinsic Pathway for Apoptosis	6	3	XIAP,BAX,BCL2	3	PMAIP1,CYCS,DIABLO	0.86	0.137344
SARS-CoV-2 Infection	2	1	VHL	1	ZCRB1	0.86	0.138253
Hedgehog 'off' state	1	1	PTCH1	0		0.86	0.138616
Neural crest differentiation	6	3	NOTCH2,ETS1,HDAC6	3	TCF4,PMP22,CTBP2	0.84	0.144595
Tryptophan metabolism	3	0		3	DLD,CAT,AFMID	0.84	0.144939
miRNA in muscle cell differentiation	3	3	SRF,PRKAR2A,PRKCH	0		0.84	0.144939
Nicotine effect on dopaminergic neurons	2	0		2	CDK5,CHRNA5	0.84	0.145717
Sebaleic acid formation and metabolism	1	1	FADS1	0		0.82	0.150987
Disorders in ketone body synthesis	1	0		1	HMGCL	0.82	0.150987
Sialylation	1	0		1	SLC35A1	0.82	0.150987
Ultraconserved region 339 modulation of tumor suppressor microRNAs in cancer	1	0		1	CCNE2	0.82	0.150987
G-protein beta:gamma signaling	3	2	CDC42,PDPK1	1	PAK1	0.82	0.152580
Splicing factor NOVA regulated synaptic proteins	3	1	GABBR2	2	EPB41L2,SNW1	0.82	0.152580
Synthesis of ceramides and 1-deoxyceramides	2	1	UGCG	1	ASAH1	0.80	0.157035
Familial hyperlipidemia type 4	2	1	LDLR	1	LIPC	0.80	0.157035
NAD+ biosynthetic pathways	2	1	TNKS2	1	SIRT2	0.80	0.157035
Opioid receptor pathways	16	11	KRAS,CDC42,EEA1,RPS6KA1,BCL2,BAX,ARRB1,NRP1,SYT1,SP1,JUP	5	RAF1,CASP3,TLR4,GNAZ,SQSTM1	0.79	0.160345
Host-pathogen interaction of human coronaviruses - interferon induction	3	0		3	TLR7,OAS1,TYK2	0.79	0.160345
IL6 signaling pathway	3	2	IL6R,PTPN11	1	TYK2	0.79	0.160345
Insulin processing	3	1	EXOC8	2	EXOC6,EXOC1	0.79	0.160345
TNF-related weak inducer of apoptosis (TWEAK) signaling pathway	3	0		3	BIRC2,CASP3,CASP7	0.79	0.160345
Genes controlling nephrogenesis	3	1	NOTCH2	2	CXCR4,HOXA11	0.77	0.168226
RNA Polymerase III Transcription	3	0		3	ZNF143,SSB,GTF3A	0.77	0.168226
Sildenafil treatment	2	2	NRF1,PDE4B	0		0.77	0.168510
Glycosphingolipid metabolism	2	1	UGCG	1	GLA	0.77	0.168510
Extracellular vesicles in the crosstalk of cardiac cells	2	0		2	CD81,TLR4	0.77	0.168510
Processing of SMDT1	2	1	MCU	1	MICU1	0.77	0.168510
TGF/Smad signaling pathway	1	1	CNN2	0		0.75	0.178331
TGF/Smad signaling pathway	1	1	CNN2	0		0.75	0.178331
Mitochondrial beta-oxidation	1	0		1	DECR1	0.75	0.178331
Estradiol regulation in porto-sinusoidal vascular disease	1	1	SP1	0		0.75	0.178331
SARS-CoV-2 altering angiogenesis via NRP1	1	1	NRP1	0		0.75	0.178331
Proline and hydroxyproline pathways	1	0		1	PEPD	0.75	0.178331
Metabolism of alpha-linolenic acid	1	1	FADS1	0		0.75	0.178331
Choline catabolism	1	0		1	ALDH7A1	0.75	0.178331
Benzene metabolism	1	0		1	NQO1	0.75	0.178331
mir-124 predicted interactions with cell cycle and differentiation	1	0		1	STRADB	0.75	0.178331
Synthesis of wybutosine at G37 of tRNA(Phe)	1	0		1	TYW3	0.75	0.178331
Demo_complete	1	0		1	FDFT1	0.75	0.178331
miRNA biogenesis	1	1	DICER1	0		0.75	0.178331
LDL- influence on CD14 and TLR4	2	0		2	TLR4,CREB3	0.74	0.180120
Mitotic Metaphase and Anaphase	6	1	CHMP4B	5	CHMP2A,BANF1,SIRT2,CHMP2B,CHMP7	0.74	0.181213
SARS-CoV-1 Infection	2	1	VHL	1	ZCRB1	0.74	0.183881
Mechanoregulation and pathology of YAP/TAZ via Hippo and non-Hippo mechanisms	3	1	ITGB2	2	STK3,PAK1	0.73	0.184311
Notch signaling	3	2	NOTCH2,CTBP1	1	CTBP2	0.73	0.184311
HDR through Homologous Recombination or Single Strand Annealing	2	1	BRCA2	1	BABAM1	0.73	0.184795
Signaling by VEGF	2	2	NRP1,PDPK1	0		0.72	0.189547
Sphingolipid metabolism	2	1	UGCG	1	ASAH1	0.72	0.190382
Signaling by NOTCH4	1	1	TACC3	0		0.72	0.190382
Primary focal segmental glomerulosclerosis (FSGS)	5	4	CDKN1A,ACTN4,LRP6,DAG1	1	TLR4	0.72	0.190896
Selenoamino acid metabolism	1	1	AHCY	0		0.72	0.191118
Cilium Assembly	11	4	HDAC6,TNPO1,IFT172,GBF1	7	IFT46,IFT52,BBS9,WDR19,TTC8,BBS2,IFT74	0.72	0.191822
Assembly of the primary cilium	11	4	IFT172,HDAC6,GBF1,TNPO1	7	IFT46,IFT74,IFT52,WDR19,BBS2,TTC8,BBS9	0.72	0.191822
Cancer immunotherapy by PD-1 blockade	2	2	PTPN11,NFATC2	0		0.72	0.191845
MTHFR deficiency	2	0		2	CASP3,PEMT	0.72	0.191845
ABC-family proteins mediated transport	1	1	ABCB4	0		0.72	0.192221
Class B/2 (secretin family receptors)	1	0		1	CD55	0.71	0.192952
Formation of Fibrin Clot and the Clotting Cascade	1	1	TFPI	0		0.71	0.192952
Thymic stromal lymphopoietin (TSLP) signaling pathway	3	2	PTPN11,GAB2	1	IL7R	0.70	0.200778
Effect of progerin on genes involved in Hutchinson-Gilford progeria syndrome	2	2	CHD4,CBX5	0		0.69	0.203666
Protein methylation	2	0		2	N6AMT2,CAMKMT	0.69	0.203666
Mitotic G1 phase and G1/S transition	4	3	CDKN1A,DHFR,DYRK1A	1	WEE1	0.69	0.203981
Arylamine metabolism	1	0		1	NAT1	0.69	0.204795
Acetylcholine synthesis	1	0		1	PEMT	0.69	0.204795
MTF1 activates gene expression	1	0		1	CSRP1	0.69	0.204795
DDX1 as a regulatory component of the Drosha microprocessor	1	0		1	DDX1	0.69	0.204795
Prader-Willi and Angelman syndrome	5	2	MDM2,ATP10A	3	CDK4,CYFIP1,PCM1	0.68	0.210537
Estrogen metabolism	2	0		2	HSD17B4,AKR1C3	0.67	0.215563
FGFR3 signaling in chondrocyte proliferation and terminal differentiation	2	1	CDKN1A	1	RAF1	0.67	0.215563
Follicle stimulating hormone (FSH) signaling pathway	2	0		2	RAF1,RHEB	0.67	0.215563
ncRNAs involved in Wnt signaling in hepatocellular carcinoma	6	2	LRP6,CTBP1	4	UFC1,RYK,SERPINF1,CTBP2	0.66	0.217385
Neuroinflammation and glutamatergic signaling	7	5	IL4R,IL6R,CAMKK2,PLCB2,BCL2	2	CAMK4,DLD	0.65	0.224474
Hippocampal synaptogenesis and neurogenesis	2	1	BCL2	1	PRL	0.64	0.227521
Angiotensin II receptor type 1 pathway	2	2	SP1,PTPN11	0		0.64	0.227521
Aflatoxin B1 metabolism	1	0		1	GSTM1	0.64	0.230407
COVID-19 and endothelial cell senescence	1	0		1	TLR4	0.64	0.230407
Glucose metabolism in triple-negative breast cancer cells	1	1	PFKP	0		0.64	0.230407
Ketogenesis and ketolysis	1	0		1	CAT	0.64	0.230407
Serine metabolism	1	1	DHFR	0		0.64	0.230407
Cholesterol biosynthesis, regulation and transport	2	1	LSS	1	FDFT1	0.64	0.230407
Krebs cycle disorders	1	0		1	SUCLG1	0.64	0.230407
FTO obesity variant mechanism	1	1	ARID5B	0		0.64	0.230407
NAD biosynthesis II (from tryptophan)	1	0		1	AFMID	0.64	0.230407
Signaling by ROBO receptors	5	3	EIF4G1,MYO9B,NRP1	2	NELL2,PABPC1	0.63	0.233462
Kinesins	3	2	KIFC1,RACGAP1	1	KIFAP3	0.63	0.234642
SARS-CoV-2 and COVID-19 pathway	2	1	NRP1	1	TLR7	0.62	0.239522
Regulatory circuits of the STAT3 signaling pathway	3	1	IL6R	2	IL7R,TYK2	0.62	0.239522
Selective expression of chemokine receptors during T-cell polarization	2	1	IL4R	1	CXCR4	0.62	0.239522
PDGFR-beta pathway	2	1	SRF	1	RAF1	0.62	0.239522
Lipid metabolism pathway	2	1	PRKAR2A	1	PRKAG1	0.62	0.239522
Gastric cancer network 1	2	0		2	ACTL6A,CEP192	0.62	0.239522
RNA polymerase II transcribes snRNA genes	5	2	SP1,PCF11	3	ZNF143,GTF2B,CDK7	0.62	0.240775
Phosphodiesterases in neuronal function	3	1	PDE4B	2	PDE3B,GUCY1B3	0.61	0.243263
Hair follicle development: induction - Part 1 of 3	3	2	LRP6,PTCH1	1	TCF4	0.61	0.243263
PI Metabolism	5	2	PNPLA6,MTMR12	3	MTMR2,MTMR9,GDE1	0.61	0.245050
EPH-Ephrin signaling	2	0		2	SDCBP,MYL12A	0.60	0.249282
Cytokines and inflammatory response	2	0		2	HLA-DRA,HLA-DRB1	0.60	0.251552
Cell migration and invasion through p75NTR	2	0		2	EFNA4,PAK1	0.60	0.251552
Metabolism of water-soluble vitamins and cofactors	5	0		5	FLAD1,MOCS2,SLC25A19,LMBRD1,AASDHPPT	0.60	0.253893
Benzo(a)pyrene metabolism	1	0		1	AKR1C3	0.59	0.255194
Biotin metabolism, including IMDs	1	0		1	PCCB	0.59	0.255194
MicroRNA network associated with chronic lymphocytic leukemia	1	1	BCL2	0		0.59	0.255194
Thiamine metabolic pathways	1	0		1	SLC25A19	0.59	0.255194
ApoE and miR-146 in inflammation and atherosclerosis	1	0		1	TLR4	0.59	0.255194
Netrin-UNC5B signaling pathway	3	1	PTPN11	2	RAF1,CASP3	0.58	0.260649
Mitophagy	3	0		3	ULK1,MFN1,SQSTM1	0.58	0.260649
IL-1 signaling pathway	3	2	PTPN11,MAP2K7	1	SQSTM1	0.58	0.260649
WHS	2	1	TACC3	1	SLBP	0.58	0.263595
SARS-CoV-2 mitochondrial chronic oxidative stress and endothelial dysfunction	2	0		2	NDUFAF2,NDUFAF1	0.58	0.263595
Nicotinate metabolism	2	0		2	NMRK1,NUDT12	0.58	0.263595
Processing of Capped Intronless Pre-mRNA	2	1	PABPN1	1	SLBP	0.58	0.263595
Matrix metalloproteinases	2	1	TCF20	1	MMP14	0.58	0.263595
Signaling by NOTCH3	1	1	TACC3	0		0.57	0.267543
Regulation of RUNX2 expression and activity	1	1	SMURF1	0		0.57	0.268013
Cytosolic sensors of pathogen-associated DNA	1	1	MB21D1	0		0.57	0.269837
E3 ubiquitin ligases ubiquitinate target proteins	1	0		1	UBE2L3	0.57	0.271769
TP53 Regulates Metabolic Genes	1	1	DDIT4	0		0.56	0.274249
Prostaglandin and leukotriene metabolism in senescence	2	0		2	ALOX5AP,LTA4H	0.56	0.275640
15q13.3 copy number variation syndrome	2	2	FANCD2,ARHGAP11B	0		0.56	0.275640
SARS coronavirus and innate immunity	2	0		2	TLR3,TYK2	0.56	0.275640
Constitutive androstane receptor pathway	2	2	PPP2R4,SP1	0		0.56	0.275640
Gastric cancer network 2	2	1	LMNB2	1	RFC4	0.56	0.275640
IL-17 signaling pathway	2	1	SP1	1	TRAF3IP2	0.56	0.275640
Processing of Capped Intron-Containing Pre-mRNA	14	2	PABPN1,U2AF2	12	SNRNP27,CWC27,SNW1,SRSF11,PRCC,CRNKL1,WBP4,DNAJC8,CWC22,SRSF2,PRPF38A,CCAR1	0.56	0.276883
Senescence-Associated Secretory Phenotype (SASP)	1	0		1	IGFBP7	0.56	0.277257
TCA cycle in senescence	1	1	PDP2	0		0.55	0.279184
Steroid biosynthesis	1	0		1	HSD17B4	0.55	0.279184
15q11.2 copy number variation syndrome	1	0		1	CYFIP1	0.55	0.279184
Non-homologous end joining	1	0		1	NHEJ1	0.55	0.279184
Reelin signaling pathway	1	0		1	VLDLR	0.55	0.279184
Interleukin-1 induced activation of NF-kB	1	0		1	SQSTM1	0.55	0.279184
Lipid particles composition	1	1	LDLR	0		0.55	0.279184
Liver X receptor pathway	1	1	SCD	0		0.55	0.279184
Mammary gland development pathway - Involution (Stage 4 of 4)	1	1	BAX	0		0.55	0.279184
Abacavir transport and metabolism	1	0		1	GUK1	0.55	0.279184
Type III interferon signaling	1	0		1	TYK2	0.55	0.279184
Signaling by NOTCH2	2	1	NOTCH2	1	MDK	0.55	0.281091
Regulation of lipid metabolism by PPARalpha	8	6	CPT1A,HMGCS1,FADS1,TIAM2,ABCB4,TBL1X	2	FDFT1,ACSL1	0.55	0.281336
Acute myeloid leukemia	4	3	KRAS,PIK3CD,JUP	1	RAF1	0.54	0.286786
Cohesin complex - Cornelia de Lange syndrome	2	0		2	PPP2R5A,PPP2CB	0.54	0.287673
Resistin as a regulator of inflammation	2	2	PLCB2,PLCG2	0		0.54	0.287673
Fanconi Anemia Pathway	4	3	FANCA,FANCC,FANCD2	1	FAAP24	0.53	0.293233
Interferon gamma signaling	3	1	CIITA	2	SUMO1,MT2A	0.53	0.296664
p38 MAPK signaling pathway	2	1	CDC42	1	TRADD	0.52	0.299682
Mammary gland development pathway - Pregnancy and lactation (Stage 3 of 4)	2	1	ERBB2	1	PRL	0.52	0.299682
Fluoropyrimidine activity	2	1	DHFR	1	SMUG1	0.52	0.299682
Induction of autophagy and toll-like receptor signaling pathways by graphene oxide	1	0		1	TLR4	0.52	0.302400
NF-kB signalling pathways in COVID-19	1	0		1	TLR7	0.52	0.302400
PtdIns(4,5)P2 in cytokinesis pathway	1	1	RACGAP1	0		0.52	0.302400
SMC1/SMC3 role in DNA damage - Cornelia de Lange Syndrome	1	1	BRCA1	0		0.52	0.302400
Cellular proteostasis	1	0		1	PFDN1	0.52	0.302400
Autosomal recessive osteopetrosis pathways	1	0		1	OSTM1	0.52	0.302400
Aspirin and miRNAs	1	1	MVD	0		0.52	0.302400
Meiotic recombination	4	2	BRCA1,BRCA2	2	CDK4,BLM	0.52	0.304191
17q12 copy number variation syndrome	9	6	TAF15,MYO19,PIP4K2B,ERBB2,MLLT6,SLFN5	3	MIEN1,DDX52,AATF	0.52	0.304316
Glyoxylate metabolism	1	0		1	GRHPR	0.49	0.324870
Inclusion body myositis	1	0		1	PSENEN	0.49	0.324870
Bile acids synthesis and enterohepatic circulation	1	1	LDLR	0		0.49	0.324870
C-type lectin receptors	4	1	PLCG2	3	MALT1,UBA3,RAF1	0.48	0.334352
Prostaglandin and leukotriene metabolism in senescence	2	0		2	ALOX5AP,LTA4H	0.47	0.335463
ATF4 activates genes in response to endoplasmic reticulum stress	2	0		2	ATF4,ASNS	0.47	0.335463
Protein folding	2	0		2	TBCB,TBCE	0.47	0.341343
Regulation of toll-like receptor signaling pathway	7	3	MIR155,PIK3CD,MAP2K7	4	TLR4,TLR7,SQSTM1,TLR3	0.46	0.344209
Resolvin E1 and resolvin D1 signaling pathways promoting inflammation resolution	1	1	PIK3CD	0		0.46	0.346616
Disorders of galactose metabolism	1	0		1	GYG1	0.46	0.346616
Leukotriene metabolic pathway	1	0		1	LTA4H	0.46	0.346616
Modular map of bradykinin signaling network	11	4	BAX,GNA11,BCL2,PRKCH	7	BGLAP,SQSTM1,TRPM7,CASP3,CASP7,ROCK1,RAF1	0.46	0.346616
ACE inhibitor pathway - for workshop	1	0		1	ATP6AP2	0.46	0.346616
Neuroinflammation	1	0		1	TLR4	0.46	0.346616
Disorders of folate metabolism and transport	1	1	DHFR	0		0.46	0.346616
EDA signaling in hair follicle development	1	1	PTCH1	0		0.46	0.346616
Uptake and function of diphtheria toxin	1	0		1	CD9	0.46	0.346616
Estrogen receptor pathway	1	1	SP1	0		0.46	0.346616
Nanoparticle triggered regulated necrosis	1	0		1	TRADD	0.46	0.346616
mRNA Editing	1	1	ADAR	0		0.46	0.346616
Influenza A virus infection	1	1	BCL2	0		0.46	0.346616
Striated muscle contraction pathway	2	1	ACTN4	1	TPM2	0.46	0.347276
Response of EIF2AK1 (HRI) to heme deficiency	2	0		2	ATF4,ASNS	0.44	0.359018
Glyoxylate metabolism and glycine degradation	2	0		2	GCSH,GRHPR	0.44	0.359018
Octadecanoid formation from linoleic acid	1	0		1	GPX4	0.43	0.367661
Mineralocorticoid biosynthesis	1	0		1	AKR1C3	0.43	0.367661
Tryptophan catabolism	1	0		1	AFMID	0.43	0.367661
Kennedy pathway from sphingolipids	1	0		1	PEMT	0.43	0.367661
FOXO-mediated transcription of cell cycle genes	2	1	CDKN1A	1	GADD45A	0.43	0.370680
Interferon alpha/beta signaling	7	2	ADAR,PTPN11	5	ABCE1,IFITM3,IFITM1,PSMB8,IFITM2	0.43	0.374245
COPII-mediated vesicle transport	1	0		1	BET1	0.43	0.374608
NIK -&gt; non-canonical NF-kB signaling	1	0		1	UBA3	0.43	0.374664
Signaling by FGFR4	1	1	PTPN11	0		0.43	0.374664
Platelet homeostasis	1	1	PTPN11	0		0.42	0.375884
Protein ubiquitination	1	0		1	UBC	0.42	0.377537
TP53 Regulates Transcription of DNA Repair Genes	1	1	FANCC	0		0.42	0.379827
Visual phototransduction	1	0		1	CAMKMT	0.42	0.379827
Activation of Matrix Metalloproteinases	1	0		1	MMP14	0.42	0.379827
Common pathways underlying drug addiction	2	0		2	CAMK4,RAF1	0.42	0.382257
Eukaryotic translation elongation	1	0		1	EEF1D	0.42	0.384391
Primary ovarian insufficiency	3	1	BRCA1	2	ZP3,BLM	0.41	0.387243
Biomarkers for pyrimidine metabolism disorders	1	1	PUS1	0		0.41	0.388029
GP1b-IX-V activation signaling	1	0		1	RAF1	0.41	0.388029
Toll-like receptor signaling pathway	5	2	PIK3CD,MAP2K7	3	TLR4,TLR7,TLR3	0.41	0.390220
Pathophysiological roles of DUX4 in FSHD1	1	1	CDKN1A	0		0.39	0.407741
Vitamin B12 disorders	1	0		1	MUT	0.39	0.407741
Vitamin D (calciferol) metabolism	1	0		1	CYP2R1	0.39	0.407741
NAD+ metabolism	1	0		1	SIRT2	0.39	0.407741
Quercetin and Nf-kB / AP-1 induced apoptosis	1	0		1	NFE2L2	0.39	0.407741
Deregulation of Rab and Rab effector genes in bladder cancer	1	0		1	RAB27A	0.39	0.407741
TCF dependent signaling in response to WNT	7	3	PIP5K1B,XIAP,CTBP1	4	LEO1,ASH2L,RYK,CBY1	0.38	0.420394
Intra-Golgi and retrograde Golgi-to-ER traffic	4	1	GBF1	3	ARFIP2,USE1,STX18	0.37	0.424103
ACE inhibitor pathway	1	0		1	ATP6AP2	0.37	0.426819
Airway smooth muscle cell contraction	1	0		1	ROCK1	0.37	0.426819
MAP3K1 role in promoting and blocking gonadal determination	1	0		1	ROCK1	0.37	0.426819
Glycosaminoglycan degradation	1	0		1	HGSNAT	0.37	0.426819
miR-509-3p alteration of YAP1/ECM axis	1	0		1	PBX3	0.37	0.426819
Regulation of Wnt / B-catenin signaling by small molecule compounds	1	0		1	TCF4	0.37	0.426819
SRF and miRs in smooth muscle differentiation and proliferation	1	1	SRF	0		0.37	0.426819
Telomere Maintenance	5	0		5	NOP10,RFC2,RFC4,DNA2,POT1	0.36	0.438579
Pre-implantation embryo	3	2	ZFP36L2,ZFP36	1	E2F5	0.36	0.440682
Response of EIF2AK4 (GCN2) to amino acid deficiency	2	0		2	ASNS,ATF4	0.35	0.444698
TGF&beta;/Smad signaling pathway	1	1	CNN2	0		0.35	0.445282
TGF&beta;/Smad signaling pathway	1	1	CNN2	0		0.35	0.445282
Proteoglycan biosynthesis	1	1	SLC26A2	0		0.35	0.445282
MFAP5 effect on permeability and motility of endothelial cells via cytoskeleton rearrangement	1	1	ACTN1	0		0.35	0.445282
Transcription co-factors SKI and SKIL protein partners	1	0		1	STK3	0.35	0.445282
Tryptophan catabolism leading to NAD+ production	1	0		1	AFMID	0.35	0.445282
4-hydroxytamoxifen, dexamethasone, and retinoic acids regulation of p27 expression	1	0		1	PBK	0.35	0.445282
Genes targeted by miRNAs in adipocytes	1	1	SRF	0		0.35	0.445282
Cori cycle	1	1	PFKP	0		0.35	0.445282
Nonsense-Mediated Decay (NMD)	2	1	EIF4G1	1	PABPC1	0.35	0.445616
Eukaryotic translation initiation	2	1	EIF4G1	1	PABPC1	0.35	0.449425
S Phase	2	1	CDKN1A	1	WEE1	0.35	0.450520
DYRK1A involvement regarding cell proliferation in brain development	3	0		3	PSENEN,CASP3,E2F5	0.34	0.458325
L1CAM interactions	6	2	NRP1,VAV2	4	PAK1,LYPLA2,SDCBP,RANBP9	0.34	0.461041
Apoptotic execution phase	6	2	LMNB1,GSN	4	BIRC2,ROCK1,SATB1,STK24	0.34	0.461041
Overlap between signal transduction pathways contributing to LMNA laminopathies	3	2	AGO2,DICER1	1	CDK4	0.33	0.463090
Nephrogenesis	1	1	NOTCH2	0		0.33	0.463150
Perturbations to host-cell autophagy, induced by SARS-CoV-2 proteins	6	0		6	SQSTM1,ATG4A,ATG3,ATG12,RHEB,ULK1	0.33	0.463150
Metabolic pathway of LDL, HDL and TG, including diseases	1	1	LDLR	0		0.33	0.463150
LTF danger signal response pathway	1	0		1	TLR4	0.33	0.463150
Metabolism of folate and pterines	2	2	DHFR,SLC19A1	0		0.33	0.463150
Farnesoid X receptor pathway	1	1	ABCB4	0		0.33	0.463150
FLT3 Signaling	6	4	PTPN11,GAB2,CDKN1A,SH2B3	2	SOCS2,FLT3	0.33	0.464896
Glycerophospholipid biosynthesis	6	2	LPCAT1,MBOAT7	4	PCTP,ABHD4,PEMT,AGPAT5	0.33	0.464896
T-cell antigen receptor (TCR) pathway during Staphylococcus aureus infection	3	1	DAG1	2	MALT1,CDK4	0.33	0.472980
IL-26 signaling pathways	3	1	BAX	2	CASP3,TYK2	0.32	0.478089
Metabolism of non-coding RNA	3	3	SNRPE,SNRPG,SNRPD2	0		0.32	0.478089
Male steroid hormones in cardiomyocyte energy metabolism	1	0		1	AKR1C3	0.32	0.480443
Hypertrophy model	1	0		1	IFRD1	0.32	0.480443
Lipid metabolism in senescent cells	1	1	CDKN1A	0		0.32	0.480443
AMP-activated protein kinase signaling	3	2	CAMKK2,ADIPOR2	1	STRADB	0.32	0.483296
GPCRs, class A rhodopsin-like	6	3	GPR63,P2RY11,NTSR1	3	OPN3,GPR18,CXCR4	0.31	0.484874
Signaling by SCF-KIT	3	3	PTPN11,GAB2,SH2B3	0		0.31	0.493975
Galanin receptor pathway	1	1	CDKN1A	0		0.30	0.497180
Urea cycle and metabolism of amino groups	1	0		1	SRM	0.30	0.497180
TYSND1 cleaves peroxisomal proteins	1	0		1	SCP2	0.30	0.497180
FOXA2 pathway	1	0		1	GSTM2	0.29	0.513377
Glycerolipids and glycerophospholipids	1	0		1	PEMT	0.29	0.513377
Vitamin D in inflammatory diseases	1	1	PPP3R1	0		0.29	0.513377
PI3K/AKT/mTOR - vitamin D3 signaling	1	0		1	HLA-DRA	0.29	0.513377
Transcription factor regulation in adipogenesis	1	1	NRIP1	0		0.29	0.513377
Globo sphingolipid metabolism	1	1	GCNT1	0		0.29	0.513377
MECP2 and associated Rett syndrome	3	1	SP1	2	CSRP1,TARDBP	0.29	0.516187
Regulation of TP53 Expression and Degradation	1	1	MDM2	0		0.28	0.522364
Roles of ceramides in development of insulin resistance	1	0		1	ACSL1	0.28	0.529053
FGF23 signaling in hypophosphatemic rickets and related disorders	1	1	CDKN1A	0		0.28	0.529053
Leucine, isoleucine and valine metabolism	1	0		1	PCCB	0.28	0.529053
Hippo-YAP signaling	1	0		1	STK3	0.28	0.529053
Digestion	1	0		1	PIR	0.28	0.529053
Nucleotide-binding domain, leucine rich repeat containing receptor (NLR) signaling pathways	1	0		1	RIPK2	0.28	0.529946
Transport of bile salts and organic acids, metal ions and amine compounds	1	1	SLC39A7	0		0.27	0.535209
Hematopoietic stem cell differentiation	5	2	NFATC2,MIR155	3	HMGN5,CXCR4,MXI1	0.26	0.544002
Hair follicle development: cytodifferentiation - part 3 of 3	4	2	S100A4,LRIG1	2	LGR5,TCF4	0.26	0.544002
PPAR Beta/Delta pathway	1	1	CPT1A	0		0.26	0.544224
Kynurenine pathway and links to cell senescence	1	0		1	AFMID	0.26	0.544224
RORA activates gene expression	1	1	CPT1A	0		0.26	0.544224
Caspase activation via dependence receptors in the absence of ligand	1	0		1	MAGED1	0.26	0.544224
Prolactin receptor signaling	1	1	PTPN11	0		0.26	0.544224
Relationship between inflammation, COX-2 and EGFR	1	1	KRAS	0		0.25	0.558906
Hypothesized pathways in pathogenesis of cardiovascular disease	1	1	ENG	0		0.25	0.558906
Signaling by leptin	1	1	PTPN11	0		0.25	0.558906
SUMOylation	1	0		1	SUMO1	0.25	0.558906
IL-7 signaling pathway	1	0		1	IL7R	0.25	0.558906
HIV Life Cycle	5	1	RANGAP1	4	GTF2B,PPIA,RANBP1,BANF1	0.25	0.567959
Kallmann syndrome	1	1	PTPN11	0		0.24	0.573116
Glycosylation and related congenital defects	1	0		1	ALG13	0.24	0.573116
RUNX1 and FOXP3 control the development of regulatory T lymphocytes (Tregs)	1	1	NFATC2	0		0.24	0.573116
Steatosis adverse outcome pathway	2	1	SCD	1	HSD17B4	0.24	0.573116
RHO GTPases activate CIT	1	1	PRC1	0		0.24	0.573116
Ebstein-Barr virus LMP1 signaling	1	0		1	TRADD	0.24	0.573116
Polycystic kidney disease pathway	1	0		1	RHEB	0.24	0.573116
Thyroxine (thyroid hormone) production	1	0		1	RAF1	0.24	0.573116
EPO receptor signaling	1	0		1	RAF1	0.23	0.586868
NAD metabolism in oncogene-induced senescence and mitochondrial dysfunction-associated senescence	1	0		1	SIRT2	0.23	0.586868
RAS and bradykinin pathways in COVID-19	1	0		1	ROCK1	0.23	0.586868
Metabolism of angiotensinogen to angiotensins	1	1	CTSZ	0		0.23	0.586868
Metastatic brain tumor	1	1	CDC42	0		0.23	0.586868
Transport of inorganic cations/anions and amino acids/oligopeptides	2	1	SLC25A10	1	SLC7A3	0.23	0.588909
Semaphorin interactions	2	2	NRP1,SEMA4D	0		0.23	0.589783
SUMOylation of transcription cofactors	2	2	CTBP1,NRIP1	0		0.23	0.591593
Mitochondrial biogenesis	2	1	NRF1	1	CYCS	0.23	0.591593
Transcriptional regulation of white adipocyte differentiation	2	0		2	CDK4,ZNF638	0.23	0.591593
Extra-nuclear estrogen signaling	2	2	BCL2,SRF	0		0.23	0.592404
Costimulation by the CD28 family	2	2	PTPN11,PDPK1	0		0.23	0.593315
Circadian Clock	2	1	NRIP1	1	CRY1	0.23	0.593315
TP53 Regulates Transcription of Cell Death Genes	2	1	BAX	1	PMAIP1	0.23	0.594324
Factors involved in megakaryocyte development and platelet production	5	1	CBX5	4	CDK5,WEE1,AK3,VPS45	0.22	0.599287
Growth factors and hormones in Beta-cell proliferation	1	0		1	CDK4	0.22	0.600177
Growth factors and hormones in Beta-cell proliferation	1	0		1	CDK4	0.22	0.600177
Regulation of RUNX1 Expression and Activity	1	1	PTPN11	0		0.22	0.600177
Nanoparticle-mediated activation of receptor signaling	1	1	KRAS	0		0.22	0.600177
Estrogen signaling pathway	1	1	SP1	0		0.21	0.613058
Interactions of natural killer cells in pancreatic cancer	1	1	NCR3LG1	0		0.21	0.613058
Pexophagy	1	0		1	SQSTM1	0.21	0.613058
Eicosanoid metabolism via lipooxygenases (LOX)	1	0		1	LTA4H	0.21	0.613058
TLR4 signaling and tolerance	1	0		1	TLR4	0.21	0.613058
Canonical and non-canonical Notch signaling	1	1	NOTCH2	0		0.21	0.613058
RHO GTPases activate NADPH oxidases	1	0		1	PIN1	0.21	0.613058
GABA synthesis, release, reuptake and degradation	1	1	SYT1	0		0.21	0.613058
Growth factors and hormones in Beta-cell proliferation	1	0		1	CDK4	0.20	0.625523
Growth factors and hormones in Beta-cell proliferation	1	0		1	CDK4	0.20	0.625523
Female steroid hormones in cardiomyocyte energy metabolism	1	0		1	HADHB	0.20	0.625523
FOXO-mediated transcription of cell death genes	1	0		1	CITED2	0.20	0.625523
Peroxisomal lipid metabolism	1	0		1	SLC27A2	0.20	0.625523
Disturbed pathways in Duchenne Muscular Dystrophy	1	1	MCU	0		0.20	0.629574
DNA Double Strand Break Response	3	2	WHSC1,BRCA1	1	BABAM1	0.20	0.633726
Synthesis of DNA	3	0		3	DNA2,GINS2,GINS3	0.20	0.634715
Influence of laminopathies on Wnt signaling	2	2	AGO2,DICER1	0		0.19	0.649767
Deregulated CDK5 triggers multiple neurodegenerative pathways in Alzheimer's disease models	2	1	LMNB1	1	CDK5	0.19	0.649767
Fibrin complement receptor 3 signaling pathway	2	0		2	TLR3,TLR4	0.18	0.653165
tRNA aminoacylation	2	0		2	IARS2,NARS	0.18	0.653165
Chronic hyperglycemia impairment of neuron function	2	1	PRKCH	1	MMP14	0.18	0.660383
Interleukin-7 signaling	2	1	BRWD1	1	IL7R	0.18	0.660383
ATM signaling in development and disease	2	1	PPP2R4	1	CDK5	0.18	0.664177
TNFs bind their physiological receptors	2	2	TNFRSF9,EDA2R	0		0.18	0.664177
Signaling by Retinoic Acid	2	1	FABP5	1	AKR1C3	0.18	0.668079
Pluripotent stem cell differentiation pathway	2	1	IL6R	1	NT5E	0.18	0.668079
Syndecan interactions	2	1	ACTN1	1	TRAPPC4	0.18	0.668079
Transport of vitamins, nucleosides, and related molecules	2	0		2	SLC25A4,SLC35A1	0.18	0.668079
PI3K Cascade	2	1	PDPK1	1	PDE3B	0.17	0.672079
Detoxification of reactive oxygen species	2	1	PRDX5	1	NUDT2	0.17	0.672079
Integrated cancer pathway	2	0		2	ATF1,MIR21	0.17	0.672079
Urotensin-II-mediated signaling pathway	6	4	BCL2,BAX,PTPN11,FSCN1	2	CAT,CASP3	0.17	0.676165
SUMOylation of ubiquitinylation proteins	2	2	MDM2,VHL	0		0.17	0.676165
Vitamin B12 metabolism	2	1	LDLR	1	MUT	0.16	0.684560
Unfolded Protein Response	2	0		2	CREB3,ATF4	0.16	0.688850
GPVI-mediated activation cascade	2	2	PLCG2,PDPK1	0		0.16	0.688850
Interleukin-6 family signaling	2	2	IL6R,PTPN11	0		0.16	0.693192
Neurotransmitter release cycle	2	1	SYT1	1	ARL6IP5	0.16	0.693192
N-glycan biosynthesis	2	0		2	TUSC3,ALG13	0.15	0.701997
Interleukin-20 family signaling	2	1	PTPN11	1	TYK2	0.15	0.701997
Smooth Muscle Contraction	2	1	ANXA6	1	ANXA2	0.15	0.701997
Surfactant metabolism	2	0		2	ZDHHC2,CCDC59	0.15	0.701997
Cell differentiation - index	2	2	MIR155,SRF	0		0.15	0.715409
Complement and coagulation cascades	2	1	TFPI	1	F8	0.14	0.719909
Neurogenesis regulation in the olfactory epithelium	2	0		2	RTN4,CDK5	0.14	0.719909
rRNA modification in the nucleus and cytosol	2	0		2	TSR3,DIMT1	0.14	0.719909
Development of ureteric collection system	2	0		2	HOXA11,BMPR2	0.14	0.724415
Dengue-2 interactions with complement and coagulation cascades	2	1	TFPI	1	F8	0.14	0.724415
Interleukin-12 family signaling	1	0		1	TYK2	0.14	0.724902
2q11.2 copy number variation syndrome	1	1	ERBB2	0		0.14	0.725581
Signaling by PDGF	1	1	PTPN11	0		0.14	0.725581
CCL18 signaling pathway	6	4	ASAP1,SP1,CD44,ITGB2	2	ANXA2,CXCR4	0.14	0.726785
FOXO-mediated transcription of oxidative stress, metabolic and neuronal genes	1	0		1	CAT	0.14	0.726785
SUMOylation of DNA replication proteins	1	0		1	TOP2B	0.14	0.729492
RIPK1-mediated regulated necrosis	1	0		1	SDCBP	0.13	0.733171
B-WICH complex positively regulates rRNA expression	1	0		1	SMARCA5	0.13	0.733171
Neurotoxicity of clostridium toxins	1	1	SYT1	0		0.13	0.733171
Nonhomologous End-Joining	2	0		2	NHEJ1,BABAM1	0.13	0.736103
Signaling by TGF-beta Receptor Complex	1	1	SMURF1	0		0.13	0.736103
DNA Damage/Telomere Stress Induced Senescence	3	2	CDKN1A,LMNB1	1	POT1	0.13	0.737701
DNA Damage Bypass	3	2	POLH,KIAA0101	1	MAD2L2	0.13	0.739380
NGF-stimulated transcription	3	2	CHD4,SRF	1	CDK5	0.12	0.753099
3q29 copy number variation syndrome	3	0		3	MCRS1,CASP7,DYNLRB1	0.12	0.757539
TP53 regulates transcription of cell cycle genes	3	2	BAX,CDKN1A	1	GADD45A	0.11	0.771847
Mitochondrial protein import	2	0		2	PITRM1,TIMM22	0.11	0.774216
Glucose metabolism	2	1	SLC25A10	1	G6PC3	0.11	0.774799
Mitochondrial translation	2	0		2	MRRF,MTIF3	0.11	0.774799
Cellular response to hypoxia	2	0		2	HIGD1A,CITED2	0.11	0.777772
DNA Replication Pre-Initiation	2	0		2	ORC4,ORC3	0.11	0.778665
Phase I - Functionalization of compounds	4	2	ACSS1,CYP51A1	2	CYP2R1,TBXAS1	0.11	0.779616
MicroRNAs in cardiomyocyte hypertrophy	4	2	PIK3CD,LRP6	2	ROCK1,RAF1	0.11	0.779616
Plasma lipoprotein assembly, remodeling, and clearance	4	2	LDLR,HDLBP	2	LIPC,VLDLR	0.11	0.785148
GPCRs, other	4	3	HRH4,NTSR1,P2RY11	1	GPR18	0.10	0.789027
Phase II - Conjugation of compounds	5	2	BPNT1,AS3MT	3	TPMT,PNP,NAT1	0.10	0.797822
Signaling by NTRK1	3	1	CRKL	2	MAP2K5,ATF1	0.10	0.802286
SUMOylation of DNA damage response and repair proteins	3	1	BRCA1	2	BLM,CETN2	0.10	0.802628
p75 NTR receptor-mediated signaling	5	0		5	SQSTM1,RIPK2,MAGED1,AATF,ITGB3BP	0.09	0.808430
Respiratory electron transport, ATP synthesis by chemiosmotic coupling, and heat production by uncoupling proteins.	5	0		5	ETFDH,NDUFAF4,NDUFAF3,NDUFAF2,TIMMDC1	0.09	0.814713
Host Interactions of HIV factors	5	2	CCNT1,RANGAP1	3	ELMO1,RANBP1,AP2M1	0.08	0.836806
ESR-mediated signaling	7	4	SP1,NRIP1,BCL2,ZNF217	3	CHD1,KCTD6,EBAG9	0.08	0.841034
Monoamine transport	1	0		1	PPP2CB	0.00	1000000
Glucose homeostasis	1	0		1	GCA	0.00	1000000
TGF-beta receptor signaling	1	1	ENG	0		0.00	1000000
Role of hypoxia, angiogenesis, and FGF pathway in OA chondrocyte hypertrophy	1	1	VHL	0		0.00	1000000
WHS	2	1	TACC3	1	SLBP	0.00	1000000
Carnosine metabolism of glial cells	1	1	SLC7A5	0		0.00	1000000
Metabolic pathways of fibroblasts	1	1	PLOD1	0		0.00	1000000
Immune infiltration in pancreatic cancer	1	0		1	LGALS9	0.00	1000000
Markers of kidney cell lineage	1	0		1	NT5E	0.00	1000000
2q21.1 copy number variation syndrome	1	1	FAM168B	0		0.00	1000000
Diet-dependent trimethylamine/trimethylamine N-oxide metabolism	1	0		1	ALDH7A1	0.00	1000000
Inflammatory bowel disease signaling	1	0		1	TLR4	0.00	1000000
NRP1-triggered signaling pathways in pancreatic cancer	1	1	NRP1	0		0.00	1000000
GDNF signaling	17	12	GAB2,BCL2,PTPN11,LRIG1,PLCG2,S1PR1,SORL1,VAV2,SP1,ETV5,PRKAR2A,PDPK1	5	RAF1,ATF1,ROCK1,MAP2K5,AP2M1	0.00	1000000
Elabela signaling pathway	7	3	BAX,BCL2,ARRB1	4	CASP3,ATG12,ATP6AP2,CYCS	0.00	1000000
FOXP3 in COVID-19	2	1	IL6R	1	IL7R	0.00	1000000
Amino acid transport defects (IEMs)	1	0		1	SLC3A2	0.00	1000000
NR1H2 and NR1H3-mediated signaling	3	3	SCD,MYLIP,NRIP1	0		0.00	1000000
EGR2 and SOX10-mediated initiation of Schwann cell myelination	2	1	CYP51A1	1	PMP22	0.00	1000000
Transcriptional regulation of granulopoiesis	3	2	CDKN1A,IL6R	1	CDK4	0.00	1000000
Metabolism of cofactors	1	0		1	PHB	0.00	1000000
1q21.1 copy number variation syndrome	1	0		1	PRKAG1	0.00	1000000
mBDNF and proBDNF regulation of GABA neurotransmission	1	0		1	ROCK1	0.00	1000000
TGF-beta receptor signaling in skeletal dysplasias	1	1	ENG	0		0.00	1000000
Endochondral ossification with skeletal dysplasias	2	2	PTCH1,HMGCS1	0		0.00	1000000
Nephrotic syndrome	1	1	ACTN4	0		0.00	1000000
Renin-angiotensin-aldosterone system (RAAS)	5	1	PLCB2	4	CAMK4,ATF1,CREB3,ATF4	0.00	1000000
Thyroid hormones production and peripheral downstream signaling effects	3	1	MDM2	2	RHEB,RAF1	0.00	1000000
Endochondral ossification	2	2	PTCH1,HMGCS1	0		0.00	1000000
Eicosanoid metabolism via cyclooxygenases (COX)	1	0		1	TBXAS1	0.00	1000000
Overview of interferons-mediated signaling pathway	1	0		1	TYK2	0.00	1000000
Leukocyte-intrinsic Hippo pathway functions	1	0		1	CD19	0.00	1000000
Inflammatory response pathway	1	1	IL4R	0		0.00	1000000
Signaling by NTRK3 (TRKC)	1	1	BAX	0		0.00	1000000
COPI-mediated anterograde transport	2	1	GBF1	1	BET1	0.00	1000000
Signaling by NTRK2 (TRKB)	1	1	PTPN11	0		0.00	1000000
Transcriptional regulation by RUNX2	3	3	BAX,CDKN1A,HDAC6	0		0.00	1000000
Transcriptional regulation by E2F6	2	2	CBX5,BRCA1	0		0.00	1000000
Interleukin-15 signaling	1	1	GAB2	0		0.00	1000000
Neovascularisation processes	1	0		1	CXCR4	0.00	1000000
Oxidation by cytochrome P450	2	1	CYP51A1	1	CYP2R1	0.00	1000000
GABA receptor signaling	2	0		2	GABARAP,AP2M1	0.00	1000000
Biosynthesis and regeneration of tetrahydrobiopterin and catabolism of phenylalanine	1	1	DHFR	0		0.00	1000000
Wnt signaling in kidney disease	1	1	LRP6	0		0.00	1000000
Signaling by MET	3	2	LRIG1,PTPN11	1	RANBP9	0.00	1000000
Listeria monocytogenes entry into host cells	1	0		1	CTNND1	0.00	1000000
RET signaling	1	1	PTPN11	0		0.00	1000000
Transcriptional regulation by the AP-2 (TFAP2) family of transcription factors	2	2	ERBB2,CDKN1A	0		0.00	1000000
Carboxyterminal post-translational modifications of tubulin	1	1	TTL	0		0.00	1000000
TBC/RABGAPs	1	0		1	ULK1	0.00	1000000
Nucleobase catabolism	1	0		1	DNPH1	0.00	1000000
Mitochondrial fatty acid beta-oxidation	1	0		1	PCTP	0.00	1000000
OSX and miRNAs in tooth development	1	1	NOTCH2	0		0.00	1000000
Development and heterogeneity of the ILC family	1	1	TOX	0		0.00	1000000
Cannabinoid receptor signaling	1	1	PRKAR2A	0		0.00	1000000
Factors and pathways affecting insulin-like growth factor (IGF1)-Akt signaling	1	0		1	EIF2B2	0.00	1000000
Retinoid metabolism and transport	1	1	LDLR	0		0.00	1000000
Regulation of TP53 Activity through Acetylation	1	0		1	PIN1	0.00	1000000
SUMOylation of chromatin organization proteins	2	1	CBX5	1	SATB1	0.00	1000000
SUMOylation of RNA binding proteins	1	0		1	NOP58	0.00	1000000
Lung fibrosis	2	0		2	NFE2L2,MT2A	0.00	1000000
Photodynamic therapy-induced NF-kB survival signaling	1	0		1	BIRC2	0.00	1000000
Sleep regulation	1	1	AHCY	0		0.00	1000000
Endosomal sorting complex required for transport	1	0		1	CHMP7	0.00	1000000
Sulfur amino acid metabolism	1	1	SLC25A10	0		0.00	1000000
tRNA modification in the nucleus and cytosol	1	0		1	FTSJ1	0.00	1000000
Cargo concentration in the ER	1	0		1	MIA3	0.00	1000000
Metabolism of polyamines	2	0		2	SRM,NQO1	0.00	1000000
Amyloid fiber formation	3	1	SORL1	2	UBE2L6,SNCA	0.00	1000000
Base-Excision Repair, AP Site Formation	1	0		1	SMUG1	0.00	1000000
Uptake and function of anthrax toxins	1	1	MAP2K7	0		0.00	1000000
TNF signaling	2	0		2	TRADD,NSMAF	0.00	1000000
Sialic acid metabolism	1	0		1	SLC35A1	0.00	1000000
Toll-like receptor 3 (TLR3) cascade	2	0		2	TANK,TLR3	0.00	1000000
RHO GTPases activate PAKs	1	0		1	PAK1	0.00	1000000
Macroautophagy	3	0		3	ATG10,ATG3,ATG12	0.00	1000000
Oncogene Induced Senescence	2	2	SP1,ERF	0		0.00	1000000
Melatonin metabolism and effects	1	0		1	CRY1	0.00	1000000
Nuclear receptors in lipid metabolism and toxicity	1	1	ABCB4	0		0.00	1000000
miRNA targets in ECM and membrane receptors	1	1	COL6A3	0		0.00	1000000
Pregnane X receptor pathway	1	1	NRIP1	0		0.00	1000000
Hair follicle development: organogenesis - part 2 of 3	1	1	PTCH1	0		0.00	1000000
Transcriptional regulation of pluripotent stem cells	1	1	SALL4	0		0.00	1000000
Complement system	4	1	GNA15	3	CD59,CD19,SELL	0.00	1000000
Selenium metabolism and selenoproteins	1	0		1	GPX4	0.00	1000000
Cardiac hypertrophic response	1	0		1	RAF1	0.00	1000000
Toll-like Receptor Cascades	1	1	PLCG2	0		0.00	1000000
Transcriptional activity of SMAD2/SMAD3:SMAD4 heterotrimer	2	1	SP1	1	SNW1	0.00	1000000
MyD88-independent TLR4 cascade	2	1	PTPN11	1	TANK	0.00	1000000
Inositol phosphate metabolism	1	0		1	MTMR9	0.00	1000000
Regulation of mRNA stability by proteins that bind AU-rich elements	4	3	ZFP36,TNPO1,EIF4G1	1	PABPC1	0.00	1000000
Interleukin-2 family signaling	1	0		1	LGALS9	0.00	1000000
Meiotic synapsis	2	2	BRCA1,SUN2	0		0.00	1000000
Fertilization	1	0		1	CD9	0.00	1000000
DAG and IP3 signaling	2	1	PRKAR2A	1	CAMK4	0.00	1000000
ISG15 antiviral mechanism	3	0		3	UBE2L6,PIN1,PPM1B	0.00	1000000
T cell receptor and co-stimulatory signaling	1	1	DYRK1A	0		0.00	1000000
Alpha 6 beta 4 signaling pathway	1	1	PTPN11	0		0.00	1000000
Cardiac progenitor differentiation	1	0		1	CXCR4	0.00	1000000
Peptide GPCRs	2	1	NTSR1	1	CXCR4	0.00	1000000
Microtubule cytoskeleton regulation	1	1	CDC42	0		0.00	1000000
Cell differentiation - expanded index	2	2	MIR155,SRF	0		0.00	1000000
Opioid signaling	4	2	PRKAR2A,PDE4B	2	CDK5,CAMK4	0.00	1000000
Thrombin signaling through proteinase activated receptors (PARs)	1	1	ARRB1	0		0.00	1000000
Signaling by EGFR	3	3	LRIG1,PTPN11,PAG1	0		0.00	1000000
DDX58/IFIH1-mediated induction of interferon-alpha/beta	3	1	RNF125	2	PIN1,TANK	0.00	1000000
Netrin-1 signaling	2	2	MYO10,PTPN11	0		0.00	1000000
Metabolism of porphyrins	1	0		1	UROS	0.00	1000000
MAPK targets/ Nuclear events mediated by MAP kinases	1	0		1	ATF1	0.00	1000000
Interleukin-3, Interleukin-5 and GM-CSF signaling	2	1	PTPN11	1	BLNK	0.00	1000000
Cell junction organization	3	1	ACTN1	2	CTNND1,RSU1	0.00	1000000
Bile acid and bile salt metabolism	1	0		1	SLC27A2	0.00	1000000
miRNAs involved in DNA damage response	2	2	CDKN1A,H2AFX	0		0.00	1000000
Sphingolipid pathway	1	0		1	ASAH1	0.00	1000000

## Sheet: T5
Table S5: Go-Term Analysis of top 500 deregulated genes from microarray analysis of RS4;11 cells after incubation with 5 µM of AV25R for 12 h, 24 h and 36 h (compared to DMSO control cells).
cellular divalent inorganic cation homeostasis (GO:0072503)	6/111	5.77274e+16	7818869640865999	0	0	2.26702e+16	6465586012012884	STIM2;MT1F;MT1G;MT1H;MT1B;SLC39A4
anterograde synaptic vesicle transport (GO:0048490)	2/15	5.18915e+16	7818869640865999	0	0	6082696208456857	1.79963e+16	AP3M2;BLOC1S1
contractile actin filament bundle assembly (GO:0030038)	2/15	5.18915e+16	7818869640865999	0	0	6082696208456857	1.79963e+16	ZYX;ARRB1
regulation of nuclear-transcribed mRNA catabolic process, deadenylation-dependent decay (GO:1900151)	2/15	5.18915e+16	7818869640865999	0	0	6082696208456857	1.79963e+16	ZFP36;CNOT7
regulation of nuclear-transcribed mRNA poly(A) tail shortening (GO:0060211)	2/15	5.18915e+16	7818869640865999	0	0	6082696208456857	1.79963e+16	ZFP36;CNOT7
regulation of superoxide anion generation (GO:0032928)	2/15	5.18915e+16	7818869640865999	0	0	6082696208456857	1.79963e+16	ITGB2;AATF
histone mRNA catabolic process (GO:0071044)	2/15	5.18915e+16	7818869640865999	0	0	6082696208456857	1.79963e+16	EXOSC10;LSM1
lipoxygenase pathway (GO:0019372)	2/15	5.18915e+16	7818869640865999	0	0	6082696208456857	1.79963e+16	GPX4;ALOX5AP
stress fiber assembly (GO:0043149)	2/15	5.18915e+16	7818869640865999	0	0	6082696208456857	1.79963e+16	ZYX;ARRB1
synaptic vesicle transport along microtubule (GO:0099517)	2/15	5.18915e+16	7818869640865999	0	0	6082696208456857	1.79963e+16	AP3M2;BLOC1S1
negative regulation of cellular component movement (GO:0051271)	2/15	5.18915e+16	7818869640865999	0	0	6082696208456857	1.79963e+16	CCDC125;PIN1
positive regulation of nuclear-transcribed mRNA catabolic process, deadenylation-dependent decay (GO:1900153)	2/15	5.18915e+16	7818869640865999	0	0	6082696208456857	1.79963e+16	ZFP36;CNOT7
termination of RNA polymerase II transcription (GO:0006369)	3/34	5.11913e+16	7818869640865999	0	0	3.83045e+16	1.13848e+16	SLBP;PCF11;SNRPG
positive regulation of protein dephosphorylation (GO:0035307)	3/34	5.11913e+16	7818869640865999	0	0	3.83045e+16	1.13848e+16	PPP1R16B;PIN1;PPIA
protein N-linked glycosylation (GO:0006487)	2/67	4.96623e+16	825259707722326	0	0	1.21329e+16	8492146213247875	OST4;TUSC3
anion transmembrane transport (GO:0098656)	2/67	4.96623e+16	825259707722326	0	0	1.21329e+16	8492146213247875	SLC25A19;SLC7A3
chromosome organization (GO:0051276)	3/106	4.89806e+16	8251000341084651	0	0	1.14859e+16	8198032576454894	SATB1;CETN2;PHF19
small GTPase mediated signal transduction (GO:0007264)	3/106	4.89806e+16	8251000341084651	0	0	1.14859e+16	8198032576454894	TIAM2;ARHGAP18;RGL2
protein localization to nucleus (GO:0034504)	3/106	4.89806e+16	8251000341084651	0	0	1.14859e+16	8198032576454894	PINX1;CHCHD10;NXT2
regulation of protein phosphorylation (GO:0001932)	7/266	4.88316e+16	8251000341084651	0	0	1.06591e+16	7640345670376036	ITGB2;PIN1;CDK2AP1;ARRB1;PPIA;ENG;CAMKK2
positive regulation of multicellular organismal process (GO:0051240)	9/345	4.83761e+16	8251000341084651	0	0	1056492504409171	767186503699472	PRKCH;IL4R;FABP5;MDK;S100A13;PEMT;ADIPOR2;RTN4;DECR1
clathrin-dependent endocytosis (GO:0072583)	1/26	4.79002e+16	8251000341084651	0	0	1.57733e+16	1.16099e+16	ITSN2
regulation of mitotic metaphase/anaphase transition (GO:0030071)	1/26	4.79002e+16	8251000341084651	0	0	1.57733e+16	1.16099e+16	CDC23
regulation of protein insertion into mitochondrial membrane involved in apoptotic signaling pathway (GO:1900739)	1/26	4.79002e+16	8251000341084651	0	0	1.57733e+16	1.16099e+16	BID
endothelial cell development (GO:0001885)	1/26	4.79002e+16	8251000341084651	0	0	1.57733e+16	1.16099e+16	PPP1R16B
regulation of regulatory T cell differentiation (GO:0045589)	1/26	4.79002e+16	8251000341084651	0	0	1.57733e+16	1.16099e+16	MDK
glial cell development (GO:0021782)	1/26	4.79002e+16	8251000341084651	0	0	1.57733e+16	1.16099e+16	MDK
global genome nucleotide-excision repair (GO:0070911)	1/26	4.79002e+16	8251000341084651	0	0	1.57733e+16	1.16099e+16	CETN2
regulation of viral life cycle (GO:1903900)	1/26	4.79002e+16	8251000341084651	0	0	1.57733e+16	1.16099e+16	PPIA
RNA polyadenylation (GO:0043631)	1/26	4.79002e+16	8251000341084651	0	0	1.57733e+16	1.16099e+16	PCF11
snRNA processing (GO:0016180)	1/26	4.79002e+16	8251000341084651	0	0	1.57733e+16	1.16099e+16	INTS12
mononuclear cell differentiation (GO:1903131)	1/26	4.79002e+16	8251000341084651	0	0	1.57733e+16	1.16099e+16	MT1G
mRNA polyadenylation (GO:0006378)	1/26	4.79002e+16	8251000341084651	0	0	1.57733e+16	1.16099e+16	PCF11
negative regulation of protein localization to membrane (GO:1905476)	1/26	4.79002e+16	8251000341084651	0	0	1.57733e+16	1.16099e+16	LZTFL1
negative regulation of transposition (GO:0010529)	1/26	4.79002e+16	8251000341084651	0	0	1.57733e+16	1.16099e+16	MOV10
positive regulation of histone methylation (GO:0031062)	1/26	4.79002e+16	8251000341084651	0	0	1.57733e+16	1.16099e+16	PHF19
positive regulation of protein insertion into mitochondrial membrane involved in apoptotic signaling pathway (GO:1900740)	1/26	4.79002e+16	8251000341084651	0	0	1.57733e+16	1.16099e+16	BID
3'-phosphoadenosine 5'-phosphosulfate metabolic process (GO:0050427)	1/25	4.65763e+16	8189894104379243	0	0	1643134278002699	1.25548e+16	SLC26A2
receptor signaling pathway via STAT (GO:0097696)	1/25	4.65763e+16	8189894104379243	0	0	1643134278002699	1.25548e+16	SOCS2
regulation of cardiac muscle cell action potential (GO:0098901)	1/25	4.65763e+16	8189894104379243	0	0	1643134278002699	1.25548e+16	JUP
regulation of epidermal cell differentiation (GO:0045604)	1/25	4.65763e+16	8189894104379243	0	0	1643134278002699	1.25548e+16	ZFP36
regulation of heterotypic cell-cell adhesion (GO:0034114)	1/25	4.65763e+16	8189894104379243	0	0	1643134278002699	1.25548e+16	CD44
regulation of mitochondrial fission (GO:0090140)	1/25	4.65763e+16	8189894104379243	0	0	1643134278002699	1.25548e+16	FIS1
regulation of neutrophil chemotaxis (GO:0090022)	1/25	4.65763e+16	8189894104379243	0	0	1643134278002699	1.25548e+16	MDK
endosome transport via multivesicular body sorting pathway (GO:0032509)	1/25	4.65763e+16	8189894104379243	0	0	1643134278002699	1.25548e+16	VTA1
energy derivation by oxidation of organic compounds (GO:0015980)	1/25	4.65763e+16	8189894104379243	0	0	1643134278002699	1.25548e+16	COQ10A
RNA splicing, via transesterification reactions (GO:0000375)	1/25	4.65763e+16	8189894104379243	0	0	1643134278002699	1.25548e+16	LSM1
negative regulation of actin filament polymerization (GO:0030837)	1/25	4.65763e+16	8189894104379243	0	0	1643134278002699	1.25548e+16	SSH2
organophosphate ester transport (GO:0015748)	1/25	4.65763e+16	8189894104379243	0	0	1643134278002699	1.25548e+16	SLC25A19
peripheral nervous system development (GO:0007422)	1/25	4.65763e+16	8189894104379243	0	0	1643134278002699	1.25548e+16	PMP22
positive regulation of DNA-templated transcription, elongation (GO:0032786)	1/25	4.65763e+16	8189894104379243	0	0	1643134278002699	1.25548e+16	CCNT1
positive regulation of ERBB signaling pathway (GO:1901186)	1/25	4.65763e+16	8189894104379243	0	0	1643134278002699	1.25548e+16	RTN4
positive regulation of release of cytochrome c from mitochondria (GO:0090200)	1/25	4.65763e+16	8189894104379243	0	0	1643134278002699	1.25548e+16	BID
positive regulation of T cell migration (GO:2000406)	1/25	4.65763e+16	8189894104379243	0	0	1643134278002699	1.25548e+16	DOCK8
regulation of protein catabolic process (GO:0042176)	3/102	4.64461e+16	8189894104379243	0	0	1.19525e+16	9166067556399540	SMURF1;PIN1;ZDHHC2
protein localization to cell periphery (GO:1990778)	4/140	4.57395e+16	8189894104379243	0	0	1.16024e+16	9075455922046874	JUP;SMURF1;PDZD11;ZDHHC2
double-strand break repair via nonhomologous end joining (GO:0006303)	2/62	4.56133e+16	8189894104379243	0	0	131473968897904	103203214370907	POLB;DNTT
negative regulation of kinase activity (GO:0033673)	2/62	4.56133e+16	8189894104379243	0	0	131473968897904	103203214370907	PRDX3;PPIA
positive regulation of cysteine-type endopeptidase activity (GO:2001056)	2/62	4.56133e+16	8189894104379243	0	0	131473968897904	103203214370907	FIS1;GRAMD4
protein stabilization (GO:0050821)	5/179	4.55987e+16	8189894104379243	0	0	1.13365e+16	8902444557379757	PIN1;TBL1X;TAF9B;GOLGA7;RTN4
RNA processing (GO:0006396)	5/179	4.55987e+16	8189894104379243	0	0	1.13365e+16	8902444557379757	U2AF2;SNRPG;LSM1;ZCRB1;LSM3
amino acid import across plasma membrane (GO:0089718)	1/24	4.52188e+16	8176995427352051	0	0	1.71466e+16	1.36085e+16	SLC7A3
regulation of axon extension involved in axon guidance (GO:0048841)	1/24	4.52188e+16	8176995427352051	0	0	1.71466e+16	1.36085e+16	NRP1
axon extension (GO:0048675)	1/24	4.52188e+16	8176995427352051	0	0	1.71466e+16	1.36085e+16	NRP1
regulation of cell size (GO:0008361)	1/24	4.52188e+16	8176995427352051	0	0	1.71466e+16	1.36085e+16	LAMTOR4
regulation of cellular response to transforming growth factor beta stimulus (GO:1903844)	1/24	4.52188e+16	8176995427352051	0	0	1.71466e+16	1.36085e+16	ENG
endocrine system development (GO:0035270)	1/24	4.52188e+16	8176995427352051	0	0	1.71466e+16	1.36085e+16	MDK
immune response-activating cell surface receptor signaling pathway (GO:0002429)	1/24	4.52188e+16	8176995427352051	0	0	1.71466e+16	1.36085e+16	LAX1
leukotriene metabolic process (GO:0006691)	1/24	4.52188e+16	8176995427352051	0	0	1.71466e+16	1.36085e+16	ALOX5AP
lipid translocation (GO:0034204)	1/24	4.52188e+16	8176995427352051	0	0	1.71466e+16	1.36085e+16	ATP9A
lymphocyte activation involved in immune response (GO:0002285)	1/24	4.52188e+16	8176995427352051	0	0	1.71466e+16	1.36085e+16	MDK
wound healing, spreading of cells (GO:0044319)	1/24	4.52188e+16	8176995427352051	0	0	1.71466e+16	1.36085e+16	CD44
ncRNA 3'-end processing (GO:0043628)	1/24	4.52188e+16	8176995427352051	0	0	1.71466e+16	1.36085e+16	INTS12
negative regulation of ossification (GO:0030279)	1/24	4.52188e+16	8176995427352051	0	0	1.71466e+16	1.36085e+16	MDK
negative regulation of synaptic transmission (GO:0050805)	1/24	4.52188e+16	8176995427352051	0	0	1.71466e+16	1.36085e+16	NLGN4X
neuromuscular junction development (GO:0007528)	1/24	4.52188e+16	8176995427352051	0	0	1.71466e+16	1.36085e+16	PPFIBP1
nucleotide-excision repair, DNA gap filling (GO:0006297)	1/24	4.52188e+16	8176995427352051	0	0	1.71466e+16	1.36085e+16	POLB
positive regulation of cell-substrate junction organization (GO:0150117)	1/24	4.52188e+16	8176995427352051	0	0	1.71466e+16	1.36085e+16	NRP1
long-chain fatty acid transport (GO:0015909)	3/32	4.39786e+16	7818869640865999	0	0	4095037846930193	1.27931e+16	CPT1A;FABP5;SLC27A2
peptidyl-proline modification (GO:0018208)	3/32	4.39786e+16	7818869640865999	0	0	4095037846930193	1.27931e+16	PIN1;PPIL3;PPIA
ribonucleoprotein complex biogenesis (GO:0022613)	2/60	4.39419e+16	8102205149806401	0	0	1.36022e+16	1.11851e+16	PAK1IP1;RIOK1
positive regulation of phosphorylation (GO:0042327)	7/253	4.36423e+16	8095132478082655	0	0	1.12299e+16	9311224384478894	NRP1;PIN1;CDK2AP1;ARRB1;PPIA;ENG;CAMKK2
regulation of calcium ion transport (GO:0051924)	2/58	4.22427e+16	7991416760755968	0	0	1.40894e+16	1.21414e+16	STIM2;SARAF
regulation of pathway-restricted SMAD protein phosphorylation (GO:0060393)	2/58	4.22427e+16	7991416760755968	0	0	1.40894e+16	1.21414e+16	PIN1;ENG
fat cell differentiation (GO:0045444)	2/58	4.22427e+16	7991416760755968	0	0	1.40894e+16	1.21414e+16	CTBP2;PSMB8
negative regulation of neuron projection development (GO:0010977)	2/58	4.22427e+16	7991416760755968	0	0	1.40894e+16	1.21414e+16	MYLIP;RTN4
regulation of cell motility (GO:2000145)	4/133	4.18839e+16	7991416760755968	0	0	1.22364e+16	1.06489e+16	CCDC25;CCDC125;ARHGAP18;PIN1
regulation of lipid metabolic process (GO:0019216)	3/92	3.98925e+16	7947295923535597	0	0	1.33023e+16	1.22246e+16	HMGCS1;TBL1X;FDFT1
regulation of gene silencing by RNA (GO:0060966)	2/55	3.96454e+16	791576693154874	0	0	1.48892e+16	1.37754e+16	POLR2H;POLR2K
regulation of posttranscriptional gene silencing (GO:0060147)	2/55	3.96454e+16	791576693154874	0	0	1.48892e+16	1.37754e+16	POLR2H;POLR2K
triglyceride metabolic process (GO:0006641)	2/55	3.96454e+16	791576693154874	0	0	1.48892e+16	1.37754e+16	FABP5;LPIN2
cardiac epithelial to mesenchymal transition (GO:0060317)	1/20	3.9436e+16	7900485435029374	0	0	2.07607e+16	1.93177e+16	ENG
cardiac ventricle development (GO:0003231)	1/20	3.9436e+16	7900485435029374	0	0	2.07607e+16	1.93177e+16	ENG
regulation of fibroblast growth factor receptor signaling pathway (GO:0040036)	1/20	3.9436e+16	7900485435029374	0	0	2.07607e+16	1.93177e+16	SPRY4
regulation of granulocyte chemotaxis (GO:0071622)	1/20	3.9436e+16	7900485435029374	0	0	2.07607e+16	1.93177e+16	MDK
regulation of nuclear division (GO:0051783)	1/20	3.9436e+16	7900485435029374	0	0	2.07607e+16	1.93177e+16	PIN1
regulation of programmed necrotic cell death (GO:0062098)	1/20	3.9436e+16	7900485435029374	0	0	2.07607e+16	1.93177e+16	ASAH1
endoplasmic reticulum calcium ion homeostasis (GO:0032469)	1/20	3.9436e+16	7900485435029374	0	0	2.07607e+16	1.93177e+16	FIS1
regulation of smooth muscle cell migration (GO:0014910)	1/20	3.9436e+16	7900485435029374	0	0	2.07607e+16	1.93177e+16	NRP1
eye morphogenesis (GO:0048592)	1/20	3.9436e+16	7900485435029374	0	0	2.07607e+16	1.93177e+16	EFEMP1
fatty acid transport (GO:0015908)	1/20	3.9436e+16	7900485435029374	0	0	2.07607e+16	1.93177e+16	FABP5
regulation of T cell migration (GO:2000404)	1/20	3.9436e+16	7900485435029374	0	0	2.07607e+16	1.93177e+16	DOCK8
regulation of tissue remodeling (GO:0034103)	1/20	3.9436e+16	7900485435029374	0	0	2.07607e+16	1.93177e+16	MDK
growth hormone receptor signaling pathway (GO:0060396)	1/20	3.9436e+16	7900485435029374	0	0	2.07607e+16	1.93177e+16	SOCS2
hepaticobiliary system development (GO:0061008)	1/20	3.9436e+16	7900485435029374	0	0	2.07607e+16	1.93177e+16	ARID5B
toll-like receptor 4 signaling pathway (GO:0034142)	1/20	3.9436e+16	7900485435029374	0	0	2.07607e+16	1.93177e+16	ITGB2
negative regulation of dephosphorylation (GO:0035305)	1/20	3.9436e+16	7900485435029374	0	0	2.07607e+16	1.93177e+16	PPP1R16B
organic cation transport (GO:0015695)	1/20	3.9436e+16	7900485435029374	0	0	2.07607e+16	1.93177e+16	SLC25A19
positive regulation of activated T cell proliferation (GO:0042104)	1/20	3.9436e+16	7900485435029374	0	0	2.07607e+16	1.93177e+16	IGFBP2
positive regulation of cyclin-dependent protein kinase activity (GO:1904031)	1/20	3.9436e+16	7900485435029374	0	0	2.07607e+16	1.93177e+16	PSMD10
positive regulation of epidermal cell differentiation (GO:0045606)	1/20	3.9436e+16	7900485435029374	0	0	2.07607e+16	1.93177e+16	PRKCH
positive regulation of lymphocyte differentiation (GO:0045621)	1/20	3.9436e+16	7900485435029374	0	0	2.07607e+16	1.93177e+16	MDK
positive regulation of peptidyl-lysine acetylation (GO:2000758)	1/20	3.9436e+16	7900485435029374	0	0	2.07607e+16	1.93177e+16	ARRB1
production of small RNA involved in gene silencing by RNA (GO:0070918)	1/20	3.9436e+16	7900485435029374	0	0	2.07607e+16	1.93177e+16	ZC3H7B
negative regulation of canonical Wnt signaling pathway (GO:0090090)	5/165	3.87763e+16	7900485435029374	0	0	1233737244897959	1.1688e+16	PSMD10;PSMB7;MDK;IGFBP2;PSMB8
SCF-dependent proteasomal ubiquitin-dependent protein catabolic process (GO:0031146)	3/89	3.78803e+16	7871839718124205	0	0	1376843448667045	1336557089183523	PSMD10;PSMB7;PSMB8
transforming growth factor beta receptor signaling pathway (GO:0007179)	3/89	3.78803e+16	7871839718124205	0	0	1376843448667045	1336557089183523	SMURF1;ZYX;ENG
protein import (GO:0017038)	3/89	3.78803e+16	7871839718124205	0	0	1376843448667045	1336557089183523	FIS1;SAMM50;NXT2
regulation of intrinsic apoptotic signaling pathway (GO:2001242)	2/52	3.69957e+16	7871839718124205	0	0	1578498985801217	1.56961e+16	FIS1;BID
fatty acid beta-oxidation (GO:0006635)	2/52	3.69957e+16	7871839718124205	0	0	1578498985801217	1.56961e+16	SLC27A2;DECR1
regulation of telomere maintenance via telomerase (GO:0032210)	2/52	3.69957e+16	7871839718124205	0	0	1578498985801217	1.56961e+16	EXOSC10;PINX1
sprouting angiogenesis (GO:0002040)	2/52	3.69957e+16	7871839718124205	0	0	1578498985801217	1.56961e+16	NRP1;ENG
negative regulation of protein metabolic process (GO:0051248)	2/52	3.69957e+16	7871839718124205	0	0	1578498985801217	1.56961e+16	PFDN1;PIN1
positive regulation of developmental growth (GO:0048639)	2/52	3.69957e+16	7871839718124205	0	0	1578498985801217	1.56961e+16	ITSN2;SMURF1
positive regulation of protein localization to plasma membrane (GO:1903078)	2/52	3.69957e+16	7871839718124205	0	0	1578498985801217	1.56961e+16	PRKCH;ZDHHC2
protein homotetramerization (GO:0051289)	2/52	3.69957e+16	7871839718124205	0	0	1578498985801217	1.56961e+16	ACOT13;CRYZ
3'-UTR-mediated mRNA stabilization (GO:0070935)	1/18	3.632e+16	7871839718124205	0	0	2320552512502977	2350261438204442	ZFP36
regulation of cartilage development (GO:0061035)	1/18	3.632e+16	7871839718124205	0	0	2320552512502977	2350261438204442	MDK
regulation of catabolic process (GO:0009894)	1/18	3.632e+16	7871839718124205	0	0	2320552512502977	2350261438204442	ZDHHC2
carbohydrate derivative transport (GO:1901264)	1/18	3.632e+16	7871839718124205	0	0	2320552512502977	2350261438204442	SLC25A19
cell migration involved in sprouting angiogenesis (GO:0002042)	1/18	3.632e+16	7871839718124205	0	0	2320552512502977	2350261438204442	NRP1
cellular response to glucocorticoid stimulus (GO:0071385)	1/18	3.632e+16	7871839718124205	0	0	2320552512502977	2350261438204442	ZFP36
regulation of fatty acid metabolic process (GO:0019217)	1/18	3.632e+16	7871839718124205	0	0	2320552512502977	2350261438204442	ADIPOR2
regulation of mRNA polyadenylation (GO:1900363)	1/18	3.632e+16	7871839718124205	0	0	2320552512502977	2350261438204442	CCNT1
DNA conformation change (GO:0071103)	1/18	3.632e+16	7871839718124205	0	0	2320552512502977	2350261438204442	HAT1
regulation of oxidative stress-induced intrinsic apoptotic signaling pathway (GO:1902175)	1/18	3.632e+16	7871839718124205	0	0	2320552512502977	2350261438204442	PPIA
regulation of telomerase RNA localization to Cajal body (GO:1904872)	1/18	3.632e+16	7871839718124205	0	0	2320552512502977	2350261438204442	EXOSC10
regulation of telomere maintenance via telomere lengthening (GO:1904356)	1/18	3.632e+16	7871839718124205	0	0	2320552512502977	2350261438204442	PINX1
regulation of transcription by RNA polymerase I (GO:0006356)	1/18	3.632e+16	7871839718124205	0	0	2320552512502977	2350261438204442	POLR2K
regulation of vascular endothelial cell proliferation (GO:1905562)	1/18	3.632e+16	7871839718124205	0	0	2320552512502977	2350261438204442	MDK
hyaluronan catabolic process (GO:0030214)	1/18	3.632e+16	7871839718124205	0	0	2320552512502977	2350261438204442	CD44
sodium ion import across plasma membrane (GO:0098719)	1/18	3.632e+16	7871839718124205	0	0	2320552512502977	2350261438204442	SLC9A7
triglyceride biosynthetic process (GO:0019432)	1/18	3.632e+16	7871839718124205	0	0	2320552512502977	2350261438204442	LPIN2
microtubule depolymerization (GO:0007019)	1/18	3.632e+16	7871839718124205	0	0	2320552512502977	2350261438204442	NCKAP5
mitochondrial fusion (GO:0008053)	1/18	3.632e+16	7871839718124205	0	0	2320552512502977	2350261438204442	FIS1
negative regulation of biosynthetic process (GO:0009890)	1/18	3.632e+16	7871839718124205	0	0	2320552512502977	2350261438204442	CIITA
negative regulation of interleukin-8 production (GO:0032717)	1/18	3.632e+16	7871839718124205	0	0	2320552512502977	2350261438204442	ARRB1
negative regulation of leukocyte cell-cell adhesion (GO:1903038)	1/18	3.632e+16	7871839718124205	0	0	2320552512502977	2350261438204442	LAX1
negative regulation of Rho protein signal transduction (GO:0035024)	1/18	3.632e+16	7871839718124205	0	0	2320552512502977	2350261438204442	CCDC125
positive chemotaxis (GO:0050918)	1/18	3.632e+16	7871839718124205	0	0	2320552512502977	2350261438204442	NRP1
positive regulation of cartilage development (GO:0061036)	1/18	3.632e+16	7871839718124205	0	0	2320552512502977	2350261438204442	MDK
positive regulation of glial cell differentiation (GO:0045687)	1/18	3.632e+16	7871839718124205	0	0	2320552512502977	2350261438204442	MDK
positive regulation of macrophage derived foam cell differentiation (GO:0010744)	1/18	3.632e+16	7871839718124205	0	0	2320552512502977	2350261438204442	PRKCH
presynapse assembly (GO:0099054)	1/18	3.632e+16	7871839718124205	0	0	2320552512502977	2350261438204442	NLGN4X
retrograde vesicle-mediated transport, Golgi to endoplasmic reticulum (GO:0006890)	3/85	3.51766e+16	7871839718124205	0	0	1444303985722784	1.50899e+16	USE1;ATP9A;COPE
protein homooligomerization (GO:0051260)	4/121	3.51543e+16	7871839718124205	0	0	1.34997e+16	1.4113e+16	ALOX5AP;ACOT13;MICU1;CRYZ
aorta morphogenesis (GO:0035909)	1/17	3.47025e+16	7871839718124205	0	0	2.46571e+16	2.60961e+16	ENG
regulation of Arp2/3 complex-mediated actin nucleation (GO:0034315)	1/17	3.47025e+16	7871839718124205	0	0	2.46571e+16	2.60961e+16	GMFG
regulation of cellular response to growth factor stimulus (GO:0090287)	1/17	3.47025e+16	7871839718124205	0	0	2.46571e+16	2.60961e+16	XIAP
copper ion homeostasis (GO:0055070)	1/17	3.47025e+16	7871839718124205	0	0	2.46571e+16	2.60961e+16	XIAP
diol biosynthetic process (GO:0034312)	1/17	3.47025e+16	7871839718124205	0	0	2.46571e+16	2.60961e+16	ASAH1
DNA biosynthetic process (GO:0071897)	1/17	3.47025e+16	7871839718124205	0	0	2.46571e+16	2.60961e+16	PPIA
regulation of receptor recycling (GO:0001919)	1/17	3.47025e+16	7871839718124205	0	0	2.46571e+16	2.60961e+16	KIF16B
regulation of steroid biosynthetic process (GO:0050810)	1/17	3.47025e+16	7871839718124205	0	0	2.46571e+16	2.60961e+16	ASAH1
regulation of transferase activity (GO:0051338)	1/17	3.47025e+16	7871839718124205	0	0	2.46571e+16	2.60961e+16	PINX1
ribosomal small subunit assembly (GO:0000028)	1/17	3.47025e+16	7871839718124205	0	0	2.46571e+16	2.60961e+16	MRPS11
snRNA metabolic process (GO:0016073)	1/17	3.47025e+16	7871839718124205	0	0	2.46571e+16	2.60961e+16	INTS12
maturation of 5.8S rRNA (GO:0000460)	1/17	3.47025e+16	7871839718124205	0	0	2.46571e+16	2.60961e+16	EXOSC10
tail-anchored membrane protein insertion into ER membrane (GO:0071816)	1/17	3.47025e+16	7871839718124205	0	0	2.46571e+16	2.60961e+16	EMC4
mesenchyme morphogenesis (GO:0072132)	1/17	3.47025e+16	7871839718124205	0	0	2.46571e+16	2.60961e+16	ENG
negative regulation of ATP metabolic process (GO:1903579)	1/17	3.47025e+16	7871839718124205	0	0	2.46571e+16	2.60961e+16	FIS1
negative regulation of ATPase activity (GO:0032780)	1/17	3.47025e+16	7871839718124205	0	0	2.46571e+16	2.60961e+16	OXA1L
negative regulation of peptidyl-threonine phosphorylation (GO:0010801)	1/17	3.47025e+16	7871839718124205	0	0	2.46571e+16	2.60961e+16	SPRED2
negative regulation of viral entry into host cell (GO:0046597)	1/17	3.47025e+16	7871839718124205	0	0	2.46571e+16	2.60961e+16	CIITA
positive regulation of cyclin-dependent protein serine/threonine kinase activity (GO:0045737)	1/17	3.47025e+16	7871839718124205	0	0	2.46571e+16	2.60961e+16	PSMD10
fatty acid metabolic process (GO:0006631)	7/124	3.46626e+16	7818869640865999	0	0	2.37698e+16	799162752505285	CPT1A;GPX4;OXSM;ALOX5AP;SLC27A2;ADIPOR2;LPIN2
P-body assembly (GO:0033962)	2/12	3.42406e+16	7818869640865999	0	0	7.90872e+16	2.66867e+16	DDX6;LSM3
protein deubiquitination (GO:0016579)	8/267	3.41975e+16	7871839718124205	0	0	1.22068e+16	1.30981e+16	PSMD10;POLB;PSMB7;USP47;MCRS1;TAF10;TAF9B;PSMB8
negative regulation of transferase activity (GO:0051348)	3/29	3.41937e+16	7818869640865999	0	0	4568245778611632	1.54211e+16	PRDX3;ZFP36;PINX1
positive regulation of dephosphorylation (GO:0035306)	3/29	3.41937e+16	7818869640865999	0	0	4568245778611632	1.54211e+16	PPP1R16B;PIN1;PPIA
ribosome biogenesis (GO:0042254)	6/192	3.39825e+16	7871839718124205	0	0	1.27442e+16	1.37552e+16	EXOSC10;PAK1IP1;EXOSC8;RPL27;RIOK1;EXOSC1
long-chain fatty acid metabolic process (GO:0001676)	3/83	3.38191e+16	7871839718124205	0	0	1.48056e+16	160514654961814	CPT1A;GPX4;SLC27A2
purine ribonucleotide biosynthetic process (GO:0009152)	2/48	3.33945e+16	7871839718124205	0	0	1.71611e+16	1.8822e+16	SLC26A2;NUDT2
cognition (GO:0050890)	2/48	3.33945e+16	7871839718124205	0	0	1.71611e+16	1.8822e+16	METTL23;TUSC3
histone H4 acetylation (GO:0043967)	2/48	3.33945e+16	7871839718124205	0	0	1.71611e+16	1.8822e+16	MCRS1;HAT1
regulation of cyclin-dependent protein serine/threonine kinase activity (GO:0000079)	3/82	3.31396e+16	7871839718124205	0	0	1.49938e+16	1655980217371748	PSMD10;CCNT1;CCNE2
regulation of gene expression, epigenetic (GO:0040029)	3/82	3.31396e+16	7871839718124205	0	0	1.49938e+16	1655980217371748	POLR2H;POLR2K;PHF19
positive regulation of protein ubiquitination (GO:0031398)	3/82	3.31396e+16	7871839718124205	0	0	1.49938e+16	1655980217371748	PSMD10;XIAP;PIN1
mRNA processing (GO:0006397)	9/300	3.2613e+16	7871839718124205	0	0	1.22273e+16	1.37002e+16	PCF11;U2AF2;SNRPG;ZCRB1;PLRG1;POLR2H;PPIL3;LSM3;POLR2K
epidermal growth factor receptor signaling pathway (GO:0007173)	2/47	3.24842e+16	7871839718124205	0	0	1.75434e+16	1.97261e+16	EFEMP1;KIF16B
epithelial to mesenchymal transition (GO:0001837)	2/47	3.24842e+16	7871839718124205	0	0	1.75434e+16	1.97261e+16	S100A4;ENG
negative regulation of cold-induced thermogenesis (GO:0120163)	2/47	3.24842e+16	7871839718124205	0	0	1.75434e+16	1.97261e+16	NRDC;ACOT13
positive regulation of cell-cell adhesion (GO:0022409)	2/47	3.24842e+16	7871839718124205	0	0	1.75434e+16	1.97261e+16	MDK;CD44
neutrophil mediated immunity (GO:0002446)	14/488	3.24214e+16	7871839718124205	0	0	1168600928094599	1.31625e+16	ASAH1;TRAPPC1;JUP;GMFG;ITGB2;UBR4;PSMB7;FABP5;ADGRE5;METTL7A;SLC27A2;GOLGA7;PPIA;CD44
regulation of mitotic cell cycle phase transition (GO:1901990)	6/188	3.22326e+16	7871839718124205	0	0	1.3027e+16	1474910991295671	PSMD10;PSMB7;CDC23;CETN2;KNTC1;PSMB8
regulation of protein localization to plasma membrane (GO:1903076)	3/80	3.17802e+16	7871839718124205	0	0	1538485904339563	1.76361e+16	PRKCH;STX8;ZDHHC2
regulation of DNA damage response, signal transduction by p53 class mediator (GO:0043516)	3/28	3.1214e+16	7818869640865999	0	0	4751219512195122	1647195603982094	PSMD10;SPRED2;CD44
macromolecule catabolic process (GO:0009057)	3/28	3.1214e+16	7818869640865999	0	0	4751219512195122	1647195603982094	SMURF1;KIF16B;USE1
mRNA 3'-end processing (GO:0031124)	3/79	3.11007e+16	7871839718124205	0	0	1.55881e+16	1820595240063311	SLBP;PCF11;U2AF2
establishment of protein localization to mitochondrion (GO:0072655)	4/48	3.06274e+16	7818869640865999	0	0	3.60322e+16	1.25603e+16	FIS1;PITRM1;TIMM13;TIMM17B
branching morphogenesis of an epithelial tube (GO:0048754)	2/44	2.9736e+16	7871839718124205	0	0	1.87994e+16	2.28001e+16	NRP1;ENG
cation transmembrane transport (GO:0098655)	2/44	2.9736e+16	7871839718124205	0	0	1.87994e+16	2.28001e+16	SLC25A19;SLC7A3
intracellular protein transmembrane transport (GO:0065002)	2/44	2.9736e+16	7871839718124205	0	0	1.87994e+16	2.28001e+16	TIMM17B;PEX1
mRNA catabolic process (GO:0006402)	2/44	2.9736e+16	7871839718124205	0	0	1.87994e+16	2.28001e+16	ZFP36;EXOSC10
negative regulation of epidermal growth factor receptor signaling pathway (GO:0042059)	2/44	2.9736e+16	7871839718124205	0	0	1.87994e+16	2.28001e+16	CBLB;VPS25
positive regulation of cell-matrix adhesion (GO:0001954)	2/44	2.9736e+16	7871839718124205	0	0	1.87994e+16	2.28001e+16	NRP1;JUP
Fc-epsilon receptor signaling pathway (GO:0038095)	4/111	2.95457e+16	7871839718124205	0	0	1.4769e+16	1.80068e+16	PSMD10;PSMB7;GAB2;PSMB8
regulation of mRNA stability (GO:0043488)	8/146	2.90426e+16	7818869640865999	0	0	2305389399755974	8158752815711019	PSMD10;PSMB7;ZFP36;CARHSP1;APEX1;EXOSC8;EXOSC1;PSMB8
transcription by RNA polymerase II (GO:0006366)	14/320	2.89907e+16	7818869640865999	0	0	1826165532047885	6466049349300325	SLBP;INTS12;ELOF1;CCNT1;TAF10;GTF2E2;TAF5L;DRAP1;PCF11;SNRPG;TBL1X;POLR2H;TAF9B;POLR2K
negative regulation of type I interferon production (GO:0032480)	2/43	2.88156e+16	7871839718124205	0	0	1.92589e+16	2396294092025384	RNF125;PIN1
regulation of hematopoietic progenitor cell differentiation (GO:1901532)	3/75	2.83893e+16	7871839718124205	0	0	1.64575e+16	2.07225e+16	PSMD10;PSMB7;PSMB8
regulation of transcription from RNA polymerase II promoter in response to hypoxia (GO:0061418)	3/75	2.83893e+16	7871839718124205	0	0	1.64575e+16	2.07225e+16	PSMD10;PSMB7;PSMB8
integrin-mediated signaling pathway (GO:0007229)	3/75	2.83893e+16	7871839718124205	0	0	1.64575e+16	2.07225e+16	NRP1;ITGB2;ZYX
positive regulation of protein modification process (GO:0031401)	7/214	2.80346e+16	7871839718124205	0	0	1.33727e+16	1700653088432222	PPP1R16B;PIN1;CDK2AP1;ARRB1;PPIA;ENG;CAMKK2
NIK/NF-kappaB signaling (GO:0038061)	3/74	2.77143e+16	7871839718124205	0	0	1.66901e+16	214171310027273	PSMD10;PSMB7;PSMB8
cell junction organization (GO:0034330)	3/72	2.63694e+16	7871839718124205	0	0	1.71757e+16	2289459607714942	PPFIBP1;NLGN4X;PIN1
translational termination (GO:0006415)	8/96	2.63116e+16	2.75962e+16	0	0	3.6246e+16	2.15313e+16	OXA1L;MRPL40;MRPS11;MRPL18;MRPS34;MRPL49;MRPS21;MRPL34
ribosomal small subunit biogenesis (GO:0042274)	2/40	2.60483e+16	7818869640865999	0	0	2.07825e+16	2795704760058315	MRPS11;RIOK1
nucleocytoplasmic transport (GO:0006913)	2/40	2.60483e+16	7818869640865999	0	0	2.07825e+16	2795704760058315	SNRPG;NXT2
positive regulation of intrinsic apoptotic signaling pathway (GO:2001244)	2/40	2.60483e+16	7818869640865999	0	0	2.07825e+16	2795704760058315	FIS1;BID
positive regulation of viral transcription (GO:0050434)	3/26	2.56842e+16	7818869640865999	0	0	5164899257688229	1.89132e+16	CCNT1;POLR2H;POLR2K
regulation of cell communication (GO:0010646)	2/38	2.42039e+16	7818869640865999	0	0	2.19394e+16	3112442382189905	SOCS2;IGFBP7
connective tissue development (GO:0061448)	2/38	2.42039e+16	7818869640865999	0	0	2.19394e+16	3112442382189905	ARID5B;CD44
sterol biosynthetic process (GO:0016126)	2/38	2.42039e+16	7818869640865999	0	0	2.19394e+16	3112442382189905	HMGCS1;FDFT1
synaptic vesicle endocytosis (GO:0048488)	2/38	2.42039e+16	7818869640865999	0	0	2.19394e+16	3112442382189905	ITSN2;NLGN4X
mRNA destabilization (GO:0061157)	2/38	2.42039e+16	7818869640865999	0	0	2.19394e+16	3112442382189905	MOV10;ZFP36
regulation of epithelial cell apoptotic process (GO:1904035)	2/10	2.41183e+16	7818869640865999	0	0	9886916835699796	3.68266e+16	ZFP36;MDK
rRNA 3'-end processing (GO:0031125)	2/10	2.41183e+16	7818869640865999	0	0	9886916835699796	3.68266e+16	EXOSC10;EXOSC8
nuclear mRNA surveillance (GO:0071028)	2/10	2.41183e+16	7818869640865999	0	0	9886916835699796	3.68266e+16	EXOSC10;EXOSC8
protein oxidation (GO:0018158)	1/11	2.40994e+16	7818869640865999	0	0	3.94636e+16	5615606821177795	PRDX3
angiogenesis involved in wound healing (GO:0060055)	1/11	2.40994e+16	7818869640865999	0	0	3.94636e+16	5615606821177795	ADIPOR2
carnitine shuttle (GO:0006853)	1/11	2.40994e+16	7818869640865999	0	0	3.94636e+16	5615606821177795	CPT1A
regulation of cytoplasmic transport (GO:1903649)	1/11	2.40994e+16	7818869640865999	0	0	3.94636e+16	5615606821177795	ATP9A
regulation of endocytic recycling (GO:2001135)	1/11	2.40994e+16	7818869640865999	0	0	3.94636e+16	5615606821177795	ATP9A
cellular response to UV-A (GO:0071492)	1/11	2.40994e+16	7818869640865999	0	0	3.94636e+16	5615606821177795	OPN3
chromatin-mediated maintenance of transcription (GO:0048096)	1/11	2.40994e+16	7818869640865999	0	0	3.94636e+16	5615606821177795	ELOF1
regulation of lamellipodium morphogenesis (GO:2000392)	1/11	2.40994e+16	7818869640865999	0	0	3.94636e+16	5615606821177795	CD44
regulation of lymphocyte migration (GO:2000401)	1/11	2.40994e+16	7818869640865999	0	0	3.94636e+16	5615606821177795	GCSAM
regulation of melanin biosynthetic process (GO:0048021)	1/11	2.40994e+16	7818869640865999	0	0	3.94636e+16	5615606821177795	OPN3
regulation of mitochondrial fusion (GO:0010635)	1/11	2.40994e+16	7818869640865999	0	0	3.94636e+16	5615606821177795	ZDHHC6
desensitization of G protein-coupled receptor signaling pathway (GO:0002029)	1/11	2.40994e+16	7818869640865999	0	0	3.94636e+16	5615606821177795	ARRB1
regulation of pH (GO:0006885)	1/11	2.40994e+16	7818869640865999	0	0	3.94636e+16	5615606821177795	SLC9A7
embryonic eye morphogenesis (GO:0048048)	1/11	2.40994e+16	7818869640865999	0	0	3.94636e+16	5615606821177795	EFEMP1
hepatocyte growth factor receptor signaling pathway (GO:0048012)	1/11	2.40994e+16	7818869640865999	0	0	3.94636e+16	5615606821177795	NRP1
humoral immune response mediated by circulating immunoglobulin (GO:0002455)	1/11	2.40994e+16	7818869640865999	0	0	3.94636e+16	5615606821177795	IGLL1
miRNA mediated inhibition of translation (GO:0035278)	1/11	2.40994e+16	7818869640865999	0	0	3.94636e+16	5615606821177795	ZFP36
UDP-N-acetylglucosamine biosynthetic process (GO:0006048)	1/11	2.40994e+16	7818869640865999	0	0	3.94636e+16	5615606821177795	NAGK
mitochondrion morphogenesis (GO:0070584)	1/11	2.40994e+16	7818869640865999	0	0	3.94636e+16	5615606821177795	FIS1
monocyte differentiation (GO:0030224)	1/11	2.40994e+16	7818869640865999	0	0	3.94636e+16	5615606821177795	MT1G
negative regulation of lymphocyte migration (GO:2000402)	1/11	2.40994e+16	7818869640865999	0	0	3.94636e+16	5615606821177795	GCSAM
negative regulation of translation, ncRNA-mediated (GO:0040033)	1/11	2.40994e+16	7818869640865999	0	0	3.94636e+16	5615606821177795	ZFP36
nuclear DNA replication (GO:0033260)	1/11	2.40994e+16	7818869640865999	0	0	3.94636e+16	5615606821177795	ORC3
nucleus localization (GO:0051647)	1/11	2.40994e+16	7818869640865999	0	0	3.94636e+16	5615606821177795	SUN2
positive regulation of keratinocyte proliferation (GO:0010838)	1/11	2.40994e+16	7818869640865999	0	0	3.94636e+16	5615606821177795	MDK
positive regulation of posttranscriptional gene silencing (GO:0060148)	1/11	2.40994e+16	7818869640865999	0	0	3.94636e+16	5615606821177795	ZFP36
postsynapse assembly (GO:0099068)	1/11	2.40994e+16	7818869640865999	0	0	3.94636e+16	5615606821177795	NLGN4X
presynaptic membrane organization (GO:0097090)	1/11	2.40994e+16	7818869640865999	0	0	3.94636e+16	5615606821177795	NLGN4X
proteasome assembly (GO:0043248)	1/11	2.40994e+16	7818869640865999	0	0	3.94636e+16	5615606821177795	PSMD10
protein kinase C signaling (GO:0070528)	1/11	2.40994e+16	7818869640865999	0	0	3.94636e+16	5615606821177795	PLVAP
cellular response to chemical stress (GO:0062197)	4/101	2.40721e+16	7818869640865999	0	0	1.63e+16	2.32131e+16	PRDX3;NUDT2;PPIA;ETV5
positive regulation of protein localization to membrane (GO:1905477)	4/101	2.40721e+16	7818869640865999	0	0	1.63e+16	2.32131e+16	FIS1;PRKCH;ITGB2;BID
positive regulation of protein localization to nucleus (GO:1900182)	3/68	2.37072e+16	7818869640865999	0	0	1823639774859287	26249315757291	JUP;MCRS1;PINX1
anterograde axonal transport (GO:0008089)	2/37	2.32837e+16	7818869640865999	0	0	2.25674e+16	3.28901e+16	AP3M2;BLOC1S1
regulation of actin cytoskeleton reorganization (GO:2000249)	2/37	2.32837e+16	7818869640865999	0	0	2.25674e+16	3.28901e+16	NRP1;MDK
lysosome localization (GO:0032418)	2/37	2.32837e+16	7818869640865999	0	0	2.25674e+16	3.28901e+16	BLOC1S1;S100A13
phagocytosis, engulfment (GO:0006911)	2/37	2.32837e+16	7818869640865999	0	0	2.25674e+16	3.28901e+16	IGLL1;ITGB2
regulation of gene silencing by miRNA (GO:0060964)	3/67	2.3049e+16	7818869640865999	0	0	1.85223e+16	2.71824e+16	ZFP36;POLR2H;POLR2K
regulation of viral genome replication (GO:0045069)	3/67	2.3049e+16	7818869640865999	0	0	1.85223e+16	2.71824e+16	CNOT7;BANF1;PPIA
response to copper ion (GO:0046688)	4/23	2.2586e+16	2.51693e+16	0	0	8355021974488155	5.09072e+16	MT1F;MT1G;MT1H;MT1B
axonal transport (GO:0098930)	2/36	2.23657e+16	7818869640865999	0	0	2.32323e+16	3479368734958655	AP3M2;BLOC1S1
positive regulation of substrate adhesion-dependent cell spreading (GO:1900026)	2/36	2.23657e+16	7818869640865999	0	0	2.32323e+16	3479368734958655	NRP1;MDK
adrenal gland development (GO:0030325)	1/10	2.21722e+16	7818869640865999	0	0	438506522717049	6605369054111574	MDK
regulation of axon guidance (GO:1902667)	1/10	2.21722e+16	7818869640865999	0	0	438506522717049	6605369054111574	NRP1
calcium import into the mitochondrion (GO:0036444)	1/10	2.21722e+16	7818869640865999	0	0	438506522717049	6605369054111574	MICU1
cellular biogenic amine catabolic process (GO:0042402)	1/10	2.21722e+16	7818869640865999	0	0	438506522717049	6605369054111574	ALDH7A1
regulation of endoplasmic reticulum unfolded protein response (GO:1900101)	1/10	2.21722e+16	7818869640865999	0	0	438506522717049	6605369054111574	PIGBOS1
DNA replication-dependent nucleosome assembly (GO:0006335)	1/10	2.21722e+16	7818869640865999	0	0	438506522717049	6605369054111574	HAT1
DNA replication-dependent nucleosome organization (GO:0034723)	1/10	2.21722e+16	7818869640865999	0	0	438506522717049	6605369054111574	HAT1
ectoderm development (GO:0007398)	1/10	2.21722e+16	7818869640865999	0	0	438506522717049	6605369054111574	SMURF1
ESCRT complex disassembly (GO:1904896)	1/10	2.21722e+16	7818869640865999	0	0	438506522717049	6605369054111574	VTA1
ESCRT III complex disassembly (GO:1904903)	1/10	2.21722e+16	7818869640865999	0	0	438506522717049	6605369054111574	VTA1
regulation of store-operated calcium entry (GO:2001256)	1/10	2.21722e+16	7818869640865999	0	0	438506522717049	6605369054111574	SARAF
granulocyte activation (GO:0036230)	1/10	2.21722e+16	7818869640865999	0	0	438506522717049	6605369054111574	PREX1
granulocyte migration (GO:0097530)	1/10	2.21722e+16	7818869640865999	0	0	438506522717049	6605369054111574	ITGB2
secretory granule organization (GO:0033363)	1/10	2.21722e+16	7818869640865999	0	0	438506522717049	6605369054111574	BLOC1S1
smooth muscle tissue development (GO:0048745)	1/10	2.21722e+16	7818869640865999	0	0	438506522717049	6605369054111574	ENG
long-chain fatty acid import into cell (GO:0044539)	1/10	2.21722e+16	7818869640865999	0	0	438506522717049	6605369054111574	SLC27A2
low-density lipoprotein particle receptor catabolic process (GO:0032802)	1/10	2.21722e+16	7818869640865999	0	0	438506522717049	6605369054111574	MYLIP
low-density lipoprotein receptor particle metabolic process (GO:0032799)	1/10	2.21722e+16	7818869640865999	0	0	438506522717049	6605369054111574	MYLIP
telomere maintenance in response to DNA damage (GO:0043247)	1/10	2.21722e+16	7818869640865999	0	0	438506522717049	6605369054111574	APEX1
methylguanosine-cap decapping (GO:0110156)	1/10	2.21722e+16	7818869640865999	0	0	438506522717049	6605369054111574	LSM1
monocyte activation (GO:0042117)	1/10	2.21722e+16	7818869640865999	0	0	438506522717049	6605369054111574	MT1G
myelin assembly (GO:0032288)	1/10	2.21722e+16	7818869640865999	0	0	438506522717049	6605369054111574	PMP22
N-acetylneuraminate metabolic process (GO:0006054)	1/10	2.21722e+16	7818869640865999	0	0	438506522717049	6605369054111574	NAGK
negative regulation of protein autophosphorylation (GO:0031953)	1/10	2.21722e+16	7818869640865999	0	0	438506522717049	6605369054111574	ENG
negative regulation of telomerase activity (GO:0051974)	1/10	2.21722e+16	7818869640865999	0	0	438506522717049	6605369054111574	PINX1
negative regulation of viral-induced cytoplasmic pattern recognition receptor signaling pathway (GO:0039532)	1/10	2.21722e+16	7818869640865999	0	0	438506522717049	6605369054111574	RNF125
neuron projection fasciculation (GO:0106030)	1/10	2.21722e+16	7818869640865999	0	0	438506522717049	6605369054111574	RTN4
nuclear pore complex assembly (GO:0051292)	1/10	2.21722e+16	7818869640865999	0	0	438506522717049	6605369054111574	RTN4
nuclear-transcribed mRNA catabolic process, exonucleolytic, 3'-5' (GO:0034427)	1/10	2.21722e+16	7818869640865999	0	0	438506522717049	6605369054111574	EXOSC8
peptidyl-lysine acetylation (GO:0018394)	1/10	2.21722e+16	7818869640865999	0	0	438506522717049	6605369054111574	BLOC1S1
positive regulation of rRNA processing (GO:2000234)	1/10	2.21722e+16	7818869640865999	0	0	438506522717049	6605369054111574	RIOK1
presynaptic membrane assembly (GO:0097105)	1/10	2.21722e+16	7818869640865999	0	0	438506522717049	6605369054111574	NLGN4X
protein insertion into ER membrane by stop-transfer membrane-anchor sequence (GO:0045050)	1/10	2.21722e+16	7818869640865999	0	0	438506522717049	6605369054111574	EMC4
protein localization to endosome (GO:0036010)	1/10	2.21722e+16	7818869640865999	0	0	438506522717049	6605369054111574	NRP1
MAPK cascade (GO:0000165)	10/303	2.19989e+16	7818869640865999	0	0	1.35196e+16	2.0471e+16	PSMD10;PSMB7;PLVAP;ZFP36;RASA3;PTPN7;GOLGA7;RGL2;PSMB8;CAMKK2
base-excision repair, gap-filling (GO:0006287)	2/35	2.14506e+16	7818869640865999	0	0	2.39375e+16	3.68499e+16	POLB;APEX1
cholesterol biosynthetic process (GO:0006695)	2/35	2.14506e+16	7818869640865999	0	0	2.39375e+16	3.68499e+16	HMGCS1;FDFT1
regulation of lipid biosynthetic process (GO:0046890)	2/35	2.14506e+16	7818869640865999	0	0	2.39375e+16	3.68499e+16	ASAH1;ADIPOR2
regulation of trans-synaptic signaling (GO:0099177)	2/35	2.14506e+16	7818869640865999	0	0	2.39375e+16	3.68499e+16	NLGN4X;FABP5
maturation of SSU-rRNA (GO:0030490)	2/35	2.14506e+16	7818869640865999	0	0	2.39375e+16	3.68499e+16	MRPS11;RIOK1
negative regulation of Ras protein signal transduction (GO:0046580)	2/35	2.14506e+16	7818869640865999	0	0	2.39375e+16	3.68499e+16	CCDC125;SPRY4
regulation of cellular ketone metabolic process (GO:0010565)	3/64	2.10964e+16	7818869640865999	0	0	1.94362e+16	3.02441e+16	PSMD10;PSMB7;PSMB8
protein localization to membrane (GO:0072657)	7/195	2.09953e+16	7818869640865999	0	0	1.47387e+16	2300524035983532	JUP;PDZD11;SMURF1;FRMPD1;ITGB2;BID;ZDHHC2
regulation of cell cycle phase transition (GO:1901987)	4/95	2.09116e+16	7818869640865999	0	0	1.73801e+16	2.71975e+16	PSMD10;PSMB7;CDC23;PSMB8
protein insertion into mitochondrial membrane (GO:0051204)	3/24	2.07317e+16	7543808949818887	0	0	5657375145180024	2192849631564712	SAMM50;COX18;TIMM13
cellular response to tumor necrosis factor (GO:0071356)	7/194	2.06443e+16	7818869640865999	0	0	1.48183e+16	2.33793e+16	PSMD10;PSMB7;ASAH1;PLVAP;ZFP36;TNFRSF9;PSMB8
regulation of amyloid-beta formation (GO:1902003)	2/34	2.05391e+16	7818869640865999	0	0	2468686612576065	3.90753e+16	PIN1;RTN4
cellular response to vascular endothelial growth factor stimulus (GO:0035924)	2/34	2.05391e+16	7818869640865999	0	0	2468686612576065	3.90753e+16	NRP1;MT1G
regulation of keratinocyte differentiation (GO:0045616)	2/34	2.05391e+16	7818869640865999	0	0	2468686612576065	3.90753e+16	ZFP36;PRKCH
secondary alcohol biosynthetic process (GO:1902653)	2/34	2.05391e+16	7818869640865999	0	0	2468686612576065	3.90753e+16	HMGCS1;FDFT1
transcription by RNA polymerase I (GO:0006360)	2/34	2.05391e+16	7818869640865999	0	0	2468686612576065	3.90753e+16	POLR2H;POLR2K
organic cyclic compound biosynthetic process (GO:1901362)	2/34	2.05391e+16	7818869640865999	0	0	2468686612576065	3.90753e+16	MOCS2;FDFT1
positive regulation of mitochondrial outer membrane permeabilization involved in apoptotic signaling pathway (GO:1901030)	2/34	2.05391e+16	7818869640865999	0	0	2468686612576065	3.90753e+16	CHCHD10;BID
protein insertion into membrane (GO:0051205)	2/34	2.05391e+16	7818869640865999	0	0	2468686612576065	3.90753e+16	OXA1L;COX18
negative regulation of growth (GO:0045926)	5/126	2.02575e+16	7818869640865999	0	0	1634677011300388	2609998519146263	MT1F;MT1G;MT1H;MT1B;RTN4
biotin metabolic process (GO:0006768)	1/9	2.01961e+16	7818869640865999	0	0	4933451417004049	7891942301258216	PDZD11
bundle of His cell to Purkinje myocyte communication (GO:0086069)	1/9	2.01961e+16	7818869640865999	0	0	4933451417004049	7891942301258216	JUP
regulation of cellular extravasation (GO:0002691)	1/9	2.01961e+16	7818869640865999	0	0	4933451417004049	7891942301258216	PLVAP
regulation of glial cell proliferation (GO:0060251)	1/9	2.01961e+16	7818869640865999	0	0	4933451417004049	7891942301258216	PRKCH
regulation of histone H4 acetylation (GO:0090239)	1/9	2.01961e+16	7818869640865999	0	0	4933451417004049	7891942301258216	ARRB1
complement activation, classical pathway (GO:0006958)	1/9	2.01961e+16	7818869640865999	0	0	4933451417004049	7891942301258216	IGLL1
regulation of mammary gland epithelial cell proliferation (GO:0033599)	1/9	2.01961e+16	7818869640865999	0	0	4933451417004049	7891942301258216	RTN4
regulation of protein deacetylation (GO:0090311)	1/9	2.01961e+16	7818869640865999	0	0	4933451417004049	7891942301258216	SPRED2
endothelial cell chemotaxis (GO:0035767)	1/9	2.01961e+16	7818869640865999	0	0	4933451417004049	7891942301258216	NRP1
epithelial to mesenchymal transition involved in endocardial cushion formation (GO:0003198)	1/9	2.01961e+16	7818869640865999	0	0	4933451417004049	7891942301258216	ENG
fatty acid alpha-oxidation (GO:0001561)	1/9	2.01961e+16	7818869640865999	0	0	4933451417004049	7891942301258216	SLC27A2
regulation of tumor necrosis factor superfamily cytokine production (GO:1903555)	1/9	2.01961e+16	7818869640865999	0	0	4933451417004049	7891942301258216	ZFP36
short-chain fatty acid metabolic process (GO:0046459)	1/9	2.01961e+16	7818869640865999	0	0	4933451417004049	7891942301258216	OXSM
sympathetic ganglion development (GO:0061549)	1/9	2.01961e+16	7818869640865999	0	0	4933451417004049	7891942301258216	NRP1
maintenance of apical/basal cell polarity (GO:0035090)	1/9	2.01961e+16	7818869640865999	0	0	4933451417004049	7891942301258216	PDZD11
maintenance of epithelial cell apical/basal polarity (GO:0045199)	1/9	2.01961e+16	7818869640865999	0	0	4933451417004049	7891942301258216	PDZD11
mast cell mediated immunity (GO:0002448)	1/9	2.01961e+16	7818869640865999	0	0	4933451417004049	7891942301258216	S100A13
mitochondrial fragmentation involved in apoptotic process (GO:0043653)	1/9	2.01961e+16	7818869640865999	0	0	4933451417004049	7891942301258216	FIS1
negative regulation of exocytosis (GO:0045920)	1/9	2.01961e+16	7818869640865999	0	0	4933451417004049	7891942301258216	ATP9A
negative regulation of mRNA 3'-end processing (GO:0031441)	1/9	2.01961e+16	7818869640865999	0	0	4933451417004049	7891942301258216	CCNT1
negative regulation of protein activation cascade (GO:2000258)	1/9	2.01961e+16	7818869640865999	0	0	4933451417004049	7891942301258216	TFPI
peptidyl-cysteine modification (GO:0018198)	1/9	2.01961e+16	7818869640865999	0	0	4933451417004049	7891942301258216	PRDX3
peroxisomal transport (GO:0043574)	1/9	2.01961e+16	7818869640865999	0	0	4933451417004049	7891942301258216	PEX1
peroxisome fission (GO:0016559)	1/9	2.01961e+16	7818869640865999	0	0	4933451417004049	7891942301258216	FIS1
positive regulation of autophagy of mitochondrion (GO:1903599)	1/9	2.01961e+16	7818869640865999	0	0	4933451417004049	7891942301258216	CAMKK2
positive regulation of blood vessel endothelial cell proliferation involved in sprouting angiogenesis (GO:1903589)	1/9	2.01961e+16	7818869640865999	0	0	4933451417004049	7891942301258216	PPP1R16B
positive regulation of mast cell degranulation (GO:0043306)	1/9	2.01961e+16	7818869640865999	0	0	4933451417004049	7891942301258216	GAB2
positive regulation of protein polyubiquitination (GO:1902916)	1/9	2.01961e+16	7818869640865999	0	0	4933451417004049	7891942301258216	XIAP
postsynaptic membrane assembly (GO:0097104)	1/9	2.01961e+16	7818869640865999	0	0	4933451417004049	7891942301258216	NLGN4X
positive regulation of viral process (GO:0048524)	5/63	1.97459e+16	7334786085387579	0	0	3.42136e+16	1.34282e+16	CNOT7;CCNT1;POLR2H;PPIA;POLR2K
apoptotic mitochondrial changes (GO:0008637)	2/33	1.96321e+16	7818869640865999	0	0	2.54845e+16	4148897308229393	FIS1;BID
phosphatidylcholine biosynthetic process (GO:0006656)	2/33	1.96321e+16	7818869640865999	0	0	2.54845e+16	4148897308229393	PEMT;LPIN2
exonucleolytic trimming involved in rRNA processing (GO:0000459)	2/9	1.96123e+16	7334786085387579	0	0	1.12999e+16	4442671646709173	EXOSC10;EXOSC8
exonucleolytic trimming to generate mature 3'-end of 5.8S rRNA from tricistronic rRNA transcript (SSU-rRNA, 5.8S rRNA, LSU-rRNA) (GO:0000467)	2/9	1.96123e+16	7334786085387579	0	0	1.12999e+16	4442671646709173	EXOSC10;EXOSC8
nuclear RNA surveillance (GO:0071027)	2/9	1.96123e+16	7334786085387579	0	0	1.12999e+16	4442671646709173	EXOSC10;EXOSC8
positive regulation of mitochondrial calcium ion concentration (GO:0051561)	2/9	1.96123e+16	7334786085387579	0	0	1.12999e+16	4442671646709173	FIS1;MICU1
non-canonical Wnt signaling pathway (GO:0035567)	5/124	1.9392e+16	7818869640865999	0	0	1.66232e+16	2.72672e+16	PSMD10;MOV10;PSMB7;SMURF1;PSMB8
regulation of peptidyl-tyrosine phosphorylation (GO:0050730)	4/92	1.93789e+16	7818869640865999	0	0	1.79754e+16	2.94973e+16	NRP1;CNOT7;ITGB2;CD44
7-methylguanosine mRNA capping (GO:0006370)	2/32	1.87302e+16	7818869640865999	0	0	2633536173089926	4411257708107277	POLR2H;POLR2K
7-methylguanosine RNA capping (GO:0009452)	2/32	1.87302e+16	7818869640865999	0	0	2633536173089926	4411257708107277	POLR2H;POLR2K
protein transmembrane import into intracellular organelle (GO:0044743)	2/32	1.87302e+16	7818869640865999	0	0	2633536173089926	4411257708107277	TIMM17B;PEX1
regulation of cell morphogenesis (GO:0022604)	2/32	1.87302e+16	7818869640865999	0	0	2633536173089926	4411257708107277	MOV10;CD44
intra-Golgi vesicle-mediated transport (GO:0006891)	2/32	1.87302e+16	7818869640865999	0	0	2633536173089926	4411257708107277	COG1;COPE
transcription initiation from RNA polymerase I promoter (GO:0006361)	2/32	1.87302e+16	7818869640865999	0	0	2633536173089926	4411257708107277	POLR2H;POLR2K
mitochondrial membrane organization (GO:0007006)	2/32	1.87302e+16	7818869640865999	0	0	2633536173089926	4411257708107277	SAMM50;MTX1
negative regulation of DNA biosynthetic process (GO:2000279)	2/32	1.87302e+16	7818869640865999	0	0	2633536173089926	4411257708107277	EXOSC10;PINX1
respiratory chain complex IV assembly (GO:0008535)	3/23	1.84725e+16	7334786085387579	0	0	5940548780487805	2.37115e+16	OXA1L;COX18;BCS1L
peptidyl-L-cysteine S-palmitoylation (GO:0018230)	3/23	1.84725e+16	7334786085387579	0	0	5940548780487805	2.37115e+16	ZDHHC6;ZDHHC2;GOLGA7
peptidyl-S-diacylglycerol-L-cysteine biosynthetic process from peptidyl-cysteine (GO:0018231)	3/23	1.84725e+16	7334786085387579	0	0	5940548780487805	2.37115e+16	ZDHHC6;ZDHHC2;GOLGA7
transcription, DNA-templated (GO:0006351)	8/221	1.83365e+16	7818869640865999	0	0	1487848377052183	2523803845878982	DRAP1;CCNT1;TAF10;POLR2H;TAF9B;GTF2E2;TAF5L;POLR2K
regulation of viral transcription (GO:0046782)	4/41	1.82259e+16	7334786085387579	0	0	4286453459569549	1.71669e+16	ZFP36;CCNT1;POLR2H;POLR2K
aspartate family amino acid biosynthetic process (GO:0009067)	1/8	1.817e+16	7818869640865999	0	0	5638519375361481	9615915463273716	ASNS
axon extension involved in axon guidance (GO:0048846)	1/8	1.817e+16	7818869640865999	0	0	5638519375361481	9615915463273716	NRP1
regulation of Cdc42 protein signal transduction (GO:0032489)	1/8	1.817e+16	7818869640865999	0	0	5638519375361481	9615915463273716	NRP1
cardiac atrium development (GO:0003230)	1/8	1.817e+16	7818869640865999	0	0	5638519375361481	9615915463273716	ENG
regulation of epithelial to mesenchymal transition involved in endocardial cushion formation (GO:1905005)	1/8	1.817e+16	7818869640865999	0	0	5638519375361481	9615915463273716	ENG
cellular response to hepatocyte growth factor stimulus (GO:0035729)	1/8	1.817e+16	7818869640865999	0	0	5638519375361481	9615915463273716	NRP1
chromatin silencing at telomere (GO:0006348)	1/8	1.817e+16	7818869640865999	0	0	5638519375361481	9615915463273716	DPY30
commissural neuron axon guidance (GO:0071679)	1/8	1.817e+16	7818869640865999	0	0	5638519375361481	9615915463273716	NRP1
coronary vasculature morphogenesis (GO:0060977)	1/8	1.817e+16	7818869640865999	0	0	5638519375361481	9615915463273716	NRP1
regulation of metaphase/anaphase transition of cell cycle (GO:1902099)	1/8	1.817e+16	7818869640865999	0	0	5638519375361481	9615915463273716	CDC23
cytoplasmic sequestering of NF-kappaB (GO:0007253)	1/8	1.817e+16	7818869640865999	0	0	5638519375361481	9615915463273716	PSMD10
regulation of pattern recognition receptor signaling pathway (GO:0062207)	1/8	1.817e+16	7818869640865999	0	0	5638519375361481	9615915463273716	XIAP
establishment of protein localization to peroxisome (GO:0072663)	1/8	1.817e+16	7818869640865999	0	0	5638519375361481	9615915463273716	PEX1
fusion of virus membrane with host plasma membrane (GO:0019064)	1/8	1.817e+16	7818869640865999	0	0	5638519375361481	9615915463273716	PPIA
respiratory chain complex III assembly (GO:0017062)	1/8	1.817e+16	7818869640865999	0	0	5638519375361481	9615915463273716	BCS1L
response to hepatocyte growth factor (GO:0035728)	1/8	1.817e+16	7818869640865999	0	0	5638519375361481	9615915463273716	NRP1
internal protein amino acid acetylation (GO:0006475)	1/8	1.817e+16	7818869640865999	0	0	5638519375361481	9615915463273716	HAT1
leukocyte aggregation (GO:0070486)	1/8	1.817e+16	7818869640865999	0	0	5638519375361481	9615915463273716	CD44
lipid import into cell (GO:0140354)	1/8	1.817e+16	7818869640865999	0	0	5638519375361481	9615915463273716	SLC27A2
mast cell activation involved in immune response (GO:0002279)	1/8	1.817e+16	7818869640865999	0	0	5638519375361481	9615915463273716	S100A13
mast cell degranulation (GO:0043303)	1/8	1.817e+16	7818869640865999	0	0	5638519375361481	9615915463273716	S100A13
membrane fusion involved in viral entry into host cell (GO:0039663)	1/8	1.817e+16	7818869640865999	0	0	5638519375361481	9615915463273716	PPIA
U4 snRNA 3'-end processing (GO:0034475)	1/8	1.817e+16	7818869640865999	0	0	5638519375361481	9615915463273716	EXOSC8
mitochondrial respiratory chain complex III assembly (GO:0034551)	1/8	1.817e+16	7818869640865999	0	0	5638519375361481	9615915463273716	BCS1L
vascular associated smooth muscle cell differentiation (GO:0035886)	1/8	1.817e+16	7818869640865999	0	0	5638519375361481	9615915463273716	ENG
venous blood vessel development (GO:0060841)	1/8	1.817e+16	7818869640865999	0	0	5638519375361481	9615915463273716	ENG
ventricular trabecula myocardium morphogenesis (GO:0003222)	1/8	1.817e+16	7818869640865999	0	0	5638519375361481	9615915463273716	ENG
natural killer cell differentiation (GO:0001779)	1/8	1.817e+16	7818869640865999	0	0	5638519375361481	9615915463273716	TOX
negative regulation of actin nucleation (GO:0051126)	1/8	1.817e+16	7818869640865999	0	0	5638519375361481	9615915463273716	GMFG
negative regulation of glial cell apoptotic process (GO:0034351)	1/8	1.817e+16	7818869640865999	0	0	5638519375361481	9615915463273716	PRKCH
negative regulation of mRNA polyadenylation (GO:1900364)	1/8	1.817e+16	7818869640865999	0	0	5638519375361481	9615915463273716	CCNT1
negative regulation of striated muscle cell apoptotic process (GO:0010664)	1/8	1.817e+16	7818869640865999	0	0	5638519375361481	9615915463273716	MDK
neuron projection extension involved in neuron projection guidance (GO:1902284)	1/8	1.817e+16	7818869640865999	0	0	5638519375361481	9615915463273716	NRP1
positive regulation of endocytic recycling (GO:2001137)	1/8	1.817e+16	7818869640865999	0	0	5638519375361481	9615915463273716	ZDHHC2
positive regulation of isomerase activity (GO:0010912)	1/8	1.817e+16	7818869640865999	0	0	5638519375361481	9615915463273716	ITGB2
positive regulation of melanin biosynthetic process (GO:0048023)	1/8	1.817e+16	7818869640865999	0	0	5638519375361481	9615915463273716	OPN3
positive regulation of MHC class II biosynthetic process (GO:0045348)	1/8	1.817e+16	7818869640865999	0	0	5638519375361481	9615915463273716	CIITA
positive regulation of oligodendrocyte differentiation (GO:0048714)	1/8	1.817e+16	7818869640865999	0	0	5638519375361481	9615915463273716	MDK
positive regulation of secondary metabolite biosynthetic process (GO:1900378)	1/8	1.817e+16	7818869640865999	0	0	5638519375361481	9615915463273716	OPN3
pre-replicative complex assembly involved in nuclear cell cycle DNA replication (GO:0006267)	1/8	1.817e+16	7818869640865999	0	0	5638519375361481	9615915463273716	ORC3
fatty acid oxidation (GO:0019395)	3/59	1.79333e+16	7818869640865999	0	0	2.1177e+16	3.6393e+16	SLC27A2;ADIPOR2;DECR1
regulation of type I interferon production (GO:0032479)	4/89	1.78834e+16	7818869640865999	0	0	1.86127e+16	3203793647432494	RNF125;PIN1;POLR2H;POLR2K
post-Golgi vesicle-mediated transport (GO:0006892)	4/89	1.78834e+16	7818869640865999	0	0	1.86127e+16	3203793647432494	KIF16B;BLOC1S1;ARRB1;GOLGA7
purine nucleoside bisphosphate metabolic process (GO:0034032)	2/31	1.78344e+16	7818869640865999	0	0	2.72449e+16	4.69712e+16	OXSM;ACOT13
regulation of transmembrane receptor protein serine/threonine kinase signaling pathway (GO:0090092)	2/31	1.78344e+16	7818869640865999	0	0	2.72449e+16	4.69712e+16	XIAP;ENG
ribonucleoside bisphosphate metabolic process (GO:0033875)	2/31	1.78344e+16	7818869640865999	0	0	2.72449e+16	4.69712e+16	OXSM;ACOT13
multivesicular body organization (GO:0036257)	2/31	1.78344e+16	7818869640865999	0	0	2.72449e+16	4.69712e+16	VTA1;VPS25
negative regulation of response to DNA damage stimulus (GO:2001021)	2/31	1.78344e+16	7818869640865999	0	0	2.72449e+16	4.69712e+16	PSMD10;CD44
peptidyl-asparagine modification (GO:0018196)	2/31	1.78344e+16	7818869640865999	0	0	2.72449e+16	4.69712e+16	OST4;TUSC3
protein acetylation (GO:0006473)	2/31	1.78344e+16	7818869640865999	0	0	2.72449e+16	4.69712e+16	BLOC1S1;HAT1
mitochondrial respiratory chain complex assembly (GO:0033108)	8/90	1.7485e+16	2.07838e+16	0	0	3891020183302449	2.47041e+16	OXA1L;NDUFS8;SAMM50;COX18;NDUFA3;NDUFA1;NDUFAF3;BCS1L
regulation of establishment of planar polarity (GO:0090175)	4/88	1.73939e+16	7818869640865999	0	0	1.88352e+16	3294378997007212	PSMD10;PSMB7;SMURF1;PSMB8
receptor metabolic process (GO:0043112)	3/58	1.73171e+16	7818869640865999	0	0	2156319290465632	3781054059610407	KIF16B;SMURF1;ITGB2
RNA splicing, via transesterification reactions with bulged adenosine as nucleophile (GO:0000377)	9/251	1.71678e+16	7818869640865999	0	0	1474058769513315	2.59749e+16	PCF11;U2AF2;SNRPG;ZCRB1;PLRG1;POLR2H;PPIL3;LSM3;POLR2K
positive regulation of gene expression, epigenetic (GO:0045815)	3/57	1.67071e+16	7818869640865999	0	0	2196364046973803	3.93004e+16	ELOF1;POLR2H;POLR2K
regulation of G2/M transition of mitotic cell cycle (GO:0010389)	6/149	1.65092e+16	7818869640865999	0	0	1.66133e+16	2.99248e+16	PSMD10;USP47;PSMB7;CETN2;PINX1;PSMB8
negative regulation of cellular amide metabolic process (GO:0034249)	4/86	1.64292e+16	7818869640865999	0	0	1929660722269137	3.48519e+16	DDX6;CNOT7;PIN1;RTN4
mitochondrial translational elongation (GO:0070125)	8/89	1.62752e+16	2072769192898343	0	0	3.93926e+16	2.52928e+16	OXA1L;MRPL40;MRPS11;MRPL18;MRPS34;MRPL49;MRPS21;MRPL34
mitochondrial translational termination (GO:0070126)	8/89	1.62752e+16	2072769192898343	0	0	3.93926e+16	2.52928e+16	OXA1L;MRPL40;MRPS11;MRPL18;MRPS34;MRPL49;MRPS21;MRPL34
negative regulation of metabolic process (GO:0009892)	3/56	1.61036e+16	7818869640865999	0	0	2237919926369075	4086726113885506	FIS1;NRDC;ACOT13
proton-transporting ATP synthase complex assembly (GO:0043461)	1/7	1.60926e+16	7818869640865999	0	0	6578609986504723	1.20179e+16	OXA1L
amino sugar catabolic process (GO:0046348)	1/7	1.60926e+16	7818869640865999	0	0	6578609986504723	1.20179e+16	NAGK
amino-acid betaine metabolic process (GO:0006577)	1/7	1.60926e+16	7818869640865999	0	0	6578609986504723	1.20179e+16	CPT1A
regulation of bone remodeling (GO:0046850)	1/7	1.60926e+16	7818869640865999	0	0	6578609986504723	1.20179e+16	MDK
bleb assembly (GO:0032060)	1/7	1.60926e+16	7818869640865999	0	0	6578609986504723	1.20179e+16	PMP22
cardiac muscle cell-cardiac muscle cell adhesion (GO:0086042)	1/7	1.60926e+16	7818869640865999	0	0	6578609986504723	1.20179e+16	JUP
regulation of dopamine metabolic process (GO:0042053)	1/7	1.60926e+16	7818869640865999	0	0	6578609986504723	1.20179e+16	ITGB2
regulation of glial cell apoptotic process (GO:0034350)	1/7	1.60926e+16	7818869640865999	0	0	6578609986504723	1.20179e+16	PRKCH
regulation of histone H3-K27 methylation (GO:0061085)	1/7	1.60926e+16	7818869640865999	0	0	6578609986504723	1.20179e+16	PHF19
regulation of lens fiber cell differentiation (GO:1902746)	1/7	1.60926e+16	7818869640865999	0	0	6578609986504723	1.20179e+16	SPRED2
cytochrome complex assembly (GO:0017004)	1/7	1.60926e+16	7818869640865999	0	0	6578609986504723	1.20179e+16	COX18
regulation of MHC class I biosynthetic process (GO:0045343)	1/7	1.60926e+16	7818869640865999	0	0	6578609986504723	1.20179e+16	CIITA
deadenylation-dependent decapping of nuclear-transcribed mRNA (GO:0000290)	1/7	1.60926e+16	7818869640865999	0	0	6578609986504723	1.20179e+16	LSM1
regulation of miRNA mediated inhibition of translation (GO:1905616)	1/7	1.60926e+16	7818869640865999	0	0	6578609986504723	1.20179e+16	DDX6
dendrite arborization (GO:0140059)	1/7	1.60926e+16	7818869640865999	0	0	6578609986504723	1.20179e+16	NRP1
desmosome organization (GO:0002934)	1/7	1.60926e+16	7818869640865999	0	0	6578609986504723	1.20179e+16	JUP
regulation of necrotic cell death (GO:0010939)	1/7	1.60926e+16	7818869640865999	0	0	6578609986504723	1.20179e+16	ASAH1
dorsal aorta development (GO:0035907)	1/7	1.60926e+16	7818869640865999	0	0	6578609986504723	1.20179e+16	ENG
dorsal aorta morphogenesis (GO:0035912)	1/7	1.60926e+16	7818869640865999	0	0	6578609986504723	1.20179e+16	ENG
G protein-coupled receptor internalization (GO:0002031)	1/7	1.60926e+16	7818869640865999	0	0	6578609986504723	1.20179e+16	ARRB1
regulation of vascular associated smooth muscle cell differentiation (GO:1905063)	1/7	1.60926e+16	7818869640865999	0	0	6578609986504723	1.20179e+16	ENG
lipoxin biosynthetic process (GO:2001301)	1/7	1.60926e+16	7818869640865999	0	0	6578609986504723	1.20179e+16	ALOX5AP
substrate-dependent cell migration, cell extension (GO:0006930)	1/7	1.60926e+16	7818869640865999	0	0	6578609986504723	1.20179e+16	NRP1
maintenance of synapse structure (GO:0099558)	1/7	1.60926e+16	7818869640865999	0	0	6578609986504723	1.20179e+16	CHCHD10
terpenoid metabolic process (GO:0006721)	1/7	1.60926e+16	7818869640865999	0	0	6578609986504723	1.20179e+16	FDFT1
thiamine-containing compound metabolic process (GO:0042723)	1/7	1.60926e+16	7818869640865999	0	0	6578609986504723	1.20179e+16	SLC25A19
membrane invagination (GO:0010324)	1/7	1.60926e+16	7818869640865999	0	0	6578609986504723	1.20179e+16	SMURF1
vascular associated smooth muscle cell development (GO:0097084)	1/7	1.60926e+16	7818869640865999	0	0	6578609986504723	1.20179e+16	ENG
vascular wound healing (GO:0061042)	1/7	1.60926e+16	7818869640865999	0	0	6578609986504723	1.20179e+16	ADIPOR2
very long-chain fatty acid catabolic process (GO:0042760)	1/7	1.60926e+16	7818869640865999	0	0	6578609986504723	1.20179e+16	SLC27A2
white fat cell differentiation (GO:0050872)	1/7	1.60926e+16	7818869640865999	0	0	6578609986504723	1.20179e+16	CTBP2
xenobiotic catabolic process (GO:0042178)	1/7	1.60926e+16	7818869640865999	0	0	6578609986504723	1.20179e+16	CRYZ
zinc ion import across plasma membrane (GO:0071578)	1/7	1.60926e+16	7818869640865999	0	0	6578609986504723	1.20179e+16	SLC39A4
negative regulation of RIG-I signaling pathway (GO:0039536)	1/7	1.60926e+16	7818869640865999	0	0	6578609986504723	1.20179e+16	RNF125
negative regulation of stress-activated protein kinase signaling cascade (GO:0070303)	1/7	1.60926e+16	7818869640865999	0	0	6578609986504723	1.20179e+16	PPIA
nuclear-transcribed mRNA catabolic process, deadenylation-independent decay (GO:0031086)	1/7	1.60926e+16	7818869640865999	0	0	6578609986504723	1.20179e+16	ZFP36
pantothenate metabolic process (GO:0015939)	1/7	1.60926e+16	7818869640865999	0	0	6578609986504723	1.20179e+16	PDZD11
pentose metabolic process (GO:0019321)	1/7	1.60926e+16	7818869640865999	0	0	6578609986504723	1.20179e+16	DCXR
platelet dense granule organization (GO:0060155)	1/7	1.60926e+16	7818869640865999	0	0	6578609986504723	1.20179e+16	BLOC1S1
polyadenylation-dependent snoRNA 3'-end processing (GO:0071051)	1/7	1.60926e+16	7818869640865999	0	0	6578609986504723	1.20179e+16	EXOSC10
positive regulation of B cell receptor signaling pathway (GO:0050861)	1/7	1.60926e+16	7818869640865999	0	0	6578609986504723	1.20179e+16	PRKCH
positive regulation of cardiac epithelial to mesenchymal transition (GO:0062043)	1/7	1.60926e+16	7818869640865999	0	0	6578609986504723	1.20179e+16	ENG
positive regulation of gliogenesis (GO:0014015)	1/7	1.60926e+16	7818869640865999	0	0	6578609986504723	1.20179e+16	PRKCH
positive regulation of histone H4 acetylation (GO:0090240)	1/7	1.60926e+16	7818869640865999	0	0	6578609986504723	1.20179e+16	ARRB1
positive regulation of lipopolysaccharide-mediated signaling pathway (GO:0031666)	1/7	1.60926e+16	7818869640865999	0	0	6578609986504723	1.20179e+16	LY86
positive regulation of miRNA mediated inhibition of translation (GO:1905618)	1/7	1.60926e+16	7818869640865999	0	0	6578609986504723	1.20179e+16	DDX6
positive regulation of vascular associated smooth muscle cell differentiation (GO:1905065)	1/7	1.60926e+16	7818869640865999	0	0	6578609986504723	1.20179e+16	ENG
protein localization to basolateral plasma membrane (GO:1903361)	1/7	1.60926e+16	7818869640865999	0	0	6578609986504723	1.20179e+16	PDZD11
tumor necrosis factor-mediated signaling pathway (GO:0033209)	5/116	1.60716e+16	7818869640865999	0	0	1.78286e+16	3259286546980396	PSMD10;PSMB7;PLVAP;TNFRSF9;PSMB8
actin filament polymerization (GO:0030041)	2/29	1.60647e+16	7818869640865999	0	0	2.9266e+16	535142905782548	PREX1;GAS7
protein targeting to peroxisome (GO:0006625)	2/29	1.60647e+16	7818869640865999	0	0	2.9266e+16	535142905782548	FIS1;PEX1
regulation of protein targeting to membrane (GO:0090313)	2/29	1.60647e+16	7818869640865999	0	0	2.9266e+16	535142905782548	FIS1;ITGB2
negative regulation of wound healing (GO:0061045)	2/29	1.60647e+16	7818869640865999	0	0	2.9266e+16	535142905782548	CD109;TFPI
positive regulation of leukocyte migration (GO:0002687)	2/29	1.60647e+16	7818869640865999	0	0	2.9266e+16	535142905782548	PLVAP;MDK
positive regulation of viral genome replication (GO:0045070)	2/29	1.60647e+16	7818869640865999	0	0	2.9266e+16	535142905782548	CNOT7;PPIA
Wnt signaling pathway, planar cell polarity pathway (GO:0060071)	4/85	1.59543e+16	7818869640865999	0	0	1.95358e+16	3585694465688062	PSMD10;PSMB7;SMURF1;PSMB8
aerobic respiration (GO:0009060)	4/21	1.58743e+16	2072769192898343	0	0	9338924164370432	6019531045858386	OXA1L;NDUFS8;BLOC1S1;MTFR1L
positive regulation of canonical Wnt signaling pathway (GO:0090263)	8/130	1.56689e+16	7163505121176041	0	0	2.60989e+16	1.08469e+16	PSMD10;USP47;PSMB7;JUP;PIN1;XIAP;TBL1X;PSMB8
negative regulation of cysteine-type endopeptidase activity involved in apoptotic process (GO:0043154)	3/55	1.5507e+16	7818869640865999	0	0	2.28107e+16	4.25165e+16	USP47;XIAP;CD44
negative regulation of protein modification by small protein conjugation or removal (GO:1903321)	3/55	1.5507e+16	7818869640865999	0	0	2.28107e+16	4.25165e+16	U2AF2;PINX1;ARRB1
regulation of protein localization to nucleolus (GO:1904749)	2/8	1.55057e+16	7163505121176041	0	0	1.31839e+16	5493140231988021	MCRS1;PINX1
store-operated calcium entry (GO:0002115)	2/8	1.55057e+16	7163505121176041	0	0	1.31839e+16	5493140231988021	STIM2;ORAI2
regulation of cellular amino acid metabolic process (GO:0006521)	3/54	1.49175e+16	7818869640865999	0	0	2.32592e+16	4425385813384742	PSMD10;PSMB7;PSMB8
negative regulation of cysteine-type endopeptidase activity (GO:2000117)	3/53	1.43354e+16	7818869640865999	0	0	2372560975609756	4608548045805406	USP47;XIAP;CD44
regulation of epidermal growth factor-activated receptor activity (GO:0007176)	2/27	1.43304e+16	7818869640865999	0	0	316105476673428	6141264203308448	CBLB;VPS25
microtubule polymerization or depolymerization (GO:0031109)	2/27	1.43304e+16	7818869640865999	0	0	316105476673428	6141264203308448	PIN1;NCKAP5
peroxisomal membrane transport (GO:0015919)	2/27	1.43304e+16	7818869640865999	0	0	316105476673428	6141264203308448	FIS1;PEX1
positive regulation of gene silencing by miRNA (GO:2000637)	2/27	1.43304e+16	7818869640865999	0	0	316105476673428	6141264203308448	DDX6;ZFP36
positive regulation of mitochondrion organization (GO:0010822)	5/58	1.422e+16	7042872468059691	0	0	3745090489025799	1.59283e+16	FIS1;ZDHHC6;CHCHD10;BID;CAMKK2
mitochondrion organization (GO:0007005)	12/175	1.42147e+16	2072769192898343	0	0	294813855123271	1932818582306957	PRDX3;OXA1L;FIS1;SAMM50;PITRM1;MTX1;TIMM13;CHCHD10;TIMM17B;MTFR1L;BCS1L;BID
3'-phosphoadenosine 5'-phosphosulfate biosynthetic process (GO:0050428)	1/6	1.39625e+16	7818869640865999	0	0	7894736842105263	155431056478157	SLC26A2
adiponectin-activated signaling pathway (GO:0033211)	1/6	1.39625e+16	7818869640865999	0	0	7894736842105263	155431056478157	ADIPOR2
purine nucleobase transport (GO:0006863)	1/6	1.39625e+16	7818869640865999	0	0	7894736842105263	155431056478157	VDAC3
purine ribonucleoside bisphosphate biosynthetic process (GO:0034036)	1/6	1.39625e+16	7818869640865999	0	0	7894736842105263	155431056478157	SLC26A2
bundle of His cell-Purkinje myocyte adhesion involved in cell communication (GO:0086073)	1/6	1.39625e+16	7818869640865999	0	0	7894736842105263	155431056478157	JUP
regulation of DNA demethylation (GO:1901535)	1/6	1.39625e+16	7818869640865999	0	0	7894736842105263	155431056478157	TOX
cellular response to granulocyte macrophage colony-stimulating factor stimulus (GO:0097011)	1/6	1.39625e+16	7818869640865999	0	0	7894736842105263	155431056478157	ZFP36
regulation of hepatocyte proliferation (GO:2000345)	1/6	1.39625e+16	7818869640865999	0	0	7894736842105263	155431056478157	MDK
choline catabolic process (GO:0042426)	1/6	1.39625e+16	7818869640865999	0	0	7894736842105263	155431056478157	ALDH7A1
regulation of keratinocyte apoptotic process (GO:1902172)	1/6	1.39625e+16	7818869640865999	0	0	7894736842105263	155431056478157	ZFP36
regulation of neutrophil extravasation (GO:2000389)	1/6	1.39625e+16	7818869640865999	0	0	7894736842105263	155431056478157	MDK
regulation of protein localization to cilium (GO:1903564)	1/6	1.39625e+16	7818869640865999	0	0	7894736842105263	155431056478157	LZTFL1
regulation of retrograde transport, endosome to Golgi (GO:1905279)	1/6	1.39625e+16	7818869640865999	0	0	7894736842105263	155431056478157	ATP9A
response to granulocyte macrophage colony-stimulating factor (GO:0097012)	1/6	1.39625e+16	7818869640865999	0	0	7894736842105263	155431056478157	ZFP36
retinal ganglion cell axon guidance (GO:0031290)	1/6	1.39625e+16	7818869640865999	0	0	7894736842105263	155431056478157	NRP1
L-arginine transmembrane transport (GO:1903400)	1/6	1.39625e+16	7818869640865999	0	0	7894736842105263	155431056478157	SLC7A3
L-ornithine transmembrane transport (GO:1903352)	1/6	1.39625e+16	7818869640865999	0	0	7894736842105263	155431056478157	SLC7A3
leukocyte chemotaxis involved in inflammatory response (GO:0002232)	1/6	1.39625e+16	7818869640865999	0	0	7894736842105263	155431056478157	MDK
lipoxin metabolic process (GO:2001300)	1/6	1.39625e+16	7818869640865999	0	0	7894736842105263	155431056478157	ALOX5AP
medium-chain fatty acid biosynthetic process (GO:0051792)	1/6	1.39625e+16	7818869640865999	0	0	7894736842105263	155431056478157	OXSM
metaphase/anaphase transition of cell cycle (GO:0044784)	1/6	1.39625e+16	7818869640865999	0	0	7894736842105263	155431056478157	CDC23
metaphase/anaphase transition of mitotic cell cycle (GO:0007091)	1/6	1.39625e+16	7818869640865999	0	0	7894736842105263	155431056478157	CDC23
mitochondrial proton-transporting ATP synthase complex assembly (GO:0033615)	1/6	1.39625e+16	7818869640865999	0	0	7894736842105263	155431056478157	OXA1L
venous blood vessel morphogenesis (GO:0048845)	1/6	1.39625e+16	7818869640865999	0	0	7894736842105263	155431056478157	ENG
molybdopterin cofactor biosynthetic process (GO:0032324)	1/6	1.39625e+16	7818869640865999	0	0	7894736842105263	155431056478157	MOCS2
monoubiquitinated protein deubiquitination (GO:0035520)	1/6	1.39625e+16	7818869640865999	0	0	7894736842105263	155431056478157	USP47
N-acetylneuraminate catabolic process (GO:0019262)	1/6	1.39625e+16	7818869640865999	0	0	7894736842105263	155431056478157	NAGK
negative regulation of Arp2/3 complex-mediated actin nucleation (GO:0034316)	1/6	1.39625e+16	7818869640865999	0	0	7894736842105263	155431056478157	GMFG
negative regulation of cardiac muscle cell apoptotic process (GO:0010667)	1/6	1.39625e+16	7818869640865999	0	0	7894736842105263	155431056478157	MDK
negative regulation of endoplasmic reticulum calcium ion concentration (GO:0032471)	1/6	1.39625e+16	7818869640865999	0	0	7894736842105263	155431056478157	FIS1
negative regulation of erythrocyte differentiation (GO:0045647)	1/6	1.39625e+16	7818869640865999	0	0	7894736842105263	155431056478157	ZFP36
negative regulation of excitatory postsynaptic potential (GO:0090394)	1/6	1.39625e+16	7818869640865999	0	0	7894736842105263	155431056478157	NLGN4X
negative regulation of lens fiber cell differentiation (GO:1902747)	1/6	1.39625e+16	7818869640865999	0	0	7894736842105263	155431056478157	SPRED2
nucleotide transport (GO:0006862)	1/6	1.39625e+16	7818869640865999	0	0	7894736842105263	155431056478157	SLC25A19
positive regulation of receptor binding (GO:1900122)	1/6	1.39625e+16	7818869640865999	0	0	7894736842105263	155431056478157	NRP1
protein localization to nucleolus (GO:1902570)	1/6	1.39625e+16	7818869640865999	0	0	7894736842105263	155431056478157	PINX1
negative regulation of cell cycle G2/M phase transition (GO:1902750)	5/57	1.32561e+16	6753044196700422	0	0	3.81731e+16	165033520466946	PSMD10;USP47;PSMB7;PINX1;PSMB8
regulation of cellular amine metabolic process (GO:0033238)	3/51	1.31951e+16	7818869640865999	0	0	2.47167e+16	5005936056061755	PSMD10;PSMB7;PSMB8
regulation of protein modification process (GO:0031399)	3/51	1.31951e+16	7818869640865999	0	0	2.47167e+16	5005936056061755	PPP1R16B;SPRED2;PIN1
regulation of substrate adhesion-dependent cell spreading (GO:1900024)	3/51	1.31951e+16	7818869640865999	0	0	2.47167e+16	5005936056061755	NRP1;MDK;SPRY4
negative regulation of protein ubiquitination (GO:0031397)	3/51	1.31951e+16	7818869640865999	0	0	2.47167e+16	5005936056061755	U2AF2;PINX1;ARRB1
mitochondrial cytochrome c oxidase assembly (GO:0033617)	3/20	1.25581e+16	6585589731876031	0	0	6989956958393114	3.05978e+16	OXA1L;COX18;BCS1L
regulation of keratinocyte proliferation (GO:0010837)	2/24	1.18137e+16	7818869640865999	0	0	3.59266e+16	7673607895624151	ZFP36;MDK
DNA packaging (GO:0006323)	2/24	1.18137e+16	7818869640865999	0	0	3.59266e+16	7673607895624151	HAT1;BANF1
negative regulation of protein tyrosine kinase activity (GO:0061099)	2/24	1.18137e+16	7818869640865999	0	0	3.59266e+16	7673607895624151	CBLB;VPS25
positive regulation of protein targeting to membrane (GO:0090314)	2/24	1.18137e+16	7818869640865999	0	0	3.59266e+16	7673607895624151	FIS1;ITGB2
[truncated: 1,230 more rows]

## Sheet: T6
Table S6: KEGG-Term Analysis of top 500 deregulated genes from microarray analysis of RS4;11 cells after incubation with 5 µM of AV25R for 12 h, 24 h and 36 h (compared to DMSO control cells).
[truncated: 191 more rows]

[truncated: 1 more sheets: T7]
